# Supplementary material for: Hydroxy-directed iridium-catalyzed enantioselective formal β-C(sp2)–H allylic alkylation of α,β-unsaturated carbonyls
Source: Royal Society of Chemistry journal article supplement (doi:10.1039/d2sc03966d), 2022-01-01

## SUPPORTING INFORMATION: PART A

### Hydroxy-directed iridium-catalyzed enantioselective formal $\beta$ -C(sp<sup>2</sup>)-H allylic alkylation of $\alpha,\beta$ -unsaturated carbonyls

Sankash Mitra, Rahul Sarkar, Aditya Chakrabarty and Santanu Mukherjee\*

*Department of Organic Chemistry, Indian Institute of Science, Bangalore 560 012, INDIA*

\*Corresponding author: E-mail: [sm@iisc.ac.in](mailto:sm@iisc.ac.in)

#### Table of Contents

|    |                                                                                               |      |
|----|-----------------------------------------------------------------------------------------------|------|
| A. | General information                                                                           | S-2  |
| B. | Representative bioactive natural products containing 3-hydroxypyranone                        | S-3  |
| C. | Procedure for the synthesis of 3-hydroxypyranone derivatives                                  | S-3  |
| D. | Procedure for the synthesis of allylic alcohols                                               | S-6  |
| E. | Preliminary studies on asymmetric allylic alkylation of kojic acid                            | S-6  |
| F. | Promoter and reaction conditions optimization for asymmetric allylic alkylation of kojic acid | S-7  |
| G. | General procedure for the preparation of racemic products ( <i>rac</i> - <b>3</b> )           | S-9  |
| H. | General procedure for the Ir-catalyzed asymmetric allylic alkylation of kojic acid            | S-10 |
| I. | Unsuccessful substrates for the asymmetric allylic alkylation reaction                        | S-21 |
| J. | Large scale synthesis of <b>3aa</b> and <b>3ba</b>                                            | S-22 |
| K. | Procedure for the Staudinger reduction of <b>3da</b>                                          | S-22 |
| L. | Procedure for the selective hydrogenation of the allylic olefin of <b>3aa</b>                 | S-23 |
| M. | Procedure for the double silylation and hydroboration of <b>3aa</b>                           | S-23 |
| N. | Procedure for the oxidation of <b>6</b>                                                       | S-24 |
| O. | Procedure for the ozonolysis induced cyclization of <b>7</b>                                  | S-25 |
| P. | Procedure for the selective <i>O</i> -allylation of <b>3aa</b>                                | S-26 |
| Q. | Procedure for the ring closing metathesis of <b>9</b>                                         | S-26 |
| R. | Procedure for the triflyl protection of <b>3ba</b>                                            | S-27 |
| S. | Procedure for the Suzuki cross coupling of <b>11</b> with phenyl boronic acid                 | S-28 |
| T. | Attempted reductive removal of triflate in <b>11</b>                                          | S-28 |

## A. General information:

Infrared (FT-IR) spectra were recorded on a Bruker Alfa FT-IR,  $\nu_{\max}$  in cm<sup>-1</sup> and the bands are characterized as broad (br), strong (s), medium (m), and weak (w). NMR spectra were recorded on Bruker Ultrashield spectrometer at 400 MHz (for <sup>1</sup>H-NMR) and 100 MHz (for <sup>13</sup>C-NMR). Chemical shifts are reported in ppm from tetramethylsilane with the solvent resonance as internal standard [CDCl<sub>3</sub>:  $\delta$  7.26, CD<sub>3</sub>OD:  $\delta$  3.31, (CD<sub>3</sub>)<sub>2</sub>SO:  $\delta$  2.50 for <sup>1</sup>H-NMR and CDCl<sub>3</sub>:  $\delta$  77.16, CD<sub>3</sub>OD:  $\delta$  49.00, (CD<sub>3</sub>)<sub>2</sub>SO:  $\delta$  39.52 for <sup>13</sup>C-NMR]. For <sup>1</sup>H-NMR, data are reported as follows: chemical shift, multiplicity (s = singlet, d = doublet, dd = double doublet, ddd = doublet of doublet of doublets, t = triplet, q = quartet, sep = septet, br = broad, m = multiplet), coupling constants (Hz) and integration. High resolution mass spectrometry was performed on Waters XEVO G2-XS QToF instrument. Optical rotations were measured on a JASCO P-2000 polarimeter. Melting points were measured in open glass capillary using Büchi M-560 melting point apparatus. Enantiomeric ratios were determined by Shimadzu LC-20AD HPLC instrument and SPD-20A Diode Array Detector using stationary phase chiral columns (25 cm  $\times$  0.46 cm) in comparison with authentic racemic compounds.

Unless stated otherwise, all reactions were carried out with distilled and dried solvents under an atmosphere of nitrogen or argon in oven (120 °C) dried glassware with standard vacuum-line techniques. Organic solvents used for carrying out reactions were dried using standard methods. [Ir(COD)Cl]<sub>2</sub>, (*S*)-BINOL and *rac*-BINOL were purchased from Sigma-Aldrich, iminostilbene was purchased from Combi-Blocks and used as received. All work up and purification were carried out with reagent grade solvents in air. Thin-layer chromatography was performed using Merck silica gel 60 F<sub>254</sub> pre-coated plates (0.25 mm). Column chromatography was performed using silica gel (230-400 or 100-200 mesh). NMR yields were determined by using mesitylene as an internal standard. Unless otherwise noted, all reported yields of the Ir-catalyzed allylation reactions are isolated yields. Chiral ligands used in this work were prepared according to the literature procedure.<sup>1</sup>

---

<sup>1</sup> a) J. Y. Hamilton, D. Sarlah and E. M. Carreira, *Org. Synth*, 2015, **92**, 1-12. b) J. Y. Hamilton, D. Sarlah and E. M. Carreira, *Angew. Chem., Int. Ed.*, 2013, **52**, 7532-7535.

## B. Representative bioactive natural products containing 3-hydroxypyranone:

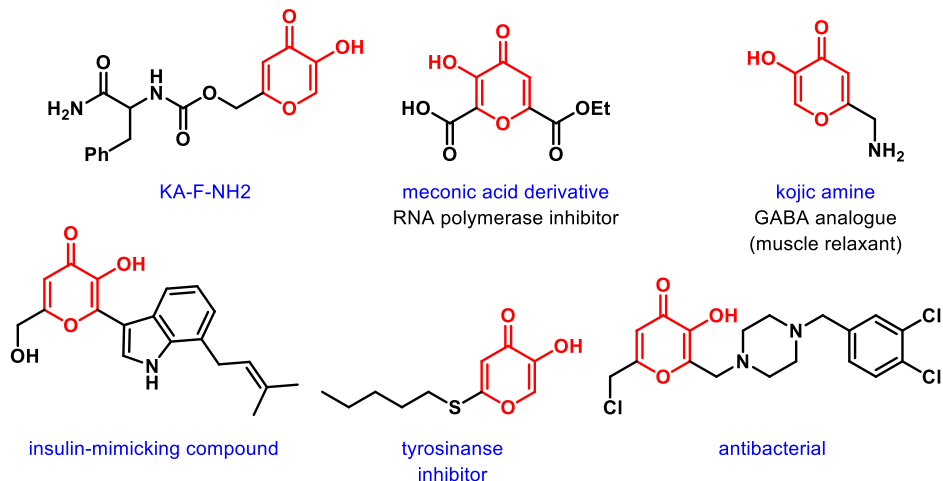

## C. Procedure for the synthesis of 3-hydroxypyranone derivatives:

Kojic acid (**1a**) and 2-hydroxynaphthaquinone (**1g**) were procured from Avra Synthesis Pvt. Ltd and Sigma-Aldrich respectively and used as received. The other 3-hydroxypyranone derivatives **1b-f**, **1h** were prepared according to the previously reported procedure and the spectral data are consistent with those described in the literature.<sup>2</sup>

**General procedure A:** **S1** was prepared according to the reported literature procedure.<sup>3</sup> Acyl chlorides were prepared according to the reported literature procedure.<sup>4</sup> 3-Hydroxypyranone derivatives **1i-j** and **1l** were prepared according to the following modified literature procedure:<sup>5</sup>

<sup>2</sup> (a) C. V. Credille, B. L. Dick, C. N. Morrison, R. W. Stokes, R. N. Adamek, N. C. Wu, I. A. Wilson and S. M. Cohen, *J. Med. Chem.*, 2018, **61**, 10206-10217. (b) S. M. Meier, M. Novak, W. Kandioller, M. A. Jakupec, V. B. Arion, N. Metzler-Nolte, B. K. Keppler and C. G. Hartinger, *Chem. Eur. J.*, 2013, **19**, 9297-9307. (c) H.-S. Rho, H.-S. Baek, S.-M. Ahn, M.-K. Kim, A. K. Ghimeray, D.-H. Cho and J.-S. Hwang, *Bull. Korean Chem. Soc.*, 2010, **31**, 2375-2378. (d) M. Spadafora, V. Y. Postupalenko, V. V. Shvadchak, A. S. Klymchenko, Y. Mély, A. Burger and R. Benhida, *Tetrahedron*, 2009, **65**, 7809-7816. (e) N. S. Poonia, A. k. Arora and A. V. Bajaj, *Bull. Chem. Soc. Jpn.*, 1980, **53**, 569-570.

<sup>3</sup> H. Kaatz, K. Streffer, U. Wollenberger and M. G. Peter, *Naturforsch.* **1999**, *54c*, 70-74.

<sup>4</sup> S. K. Kariofillis, B. J. Shields, M. A. Tekle-Smith, M. J. Zacuto and A. G. Doyle, *J. Am. Chem. Soc.*, 2020, **142**, 7683-7689.

<sup>5</sup> S. L. Capim, G. M. Gonçalves, G. C. M. dos Santos, B. G. Marinho and M. L. A. A. Vasconcellos, *Bioorg. Med. Chem.*, 2013, **21**, 6003-6010.

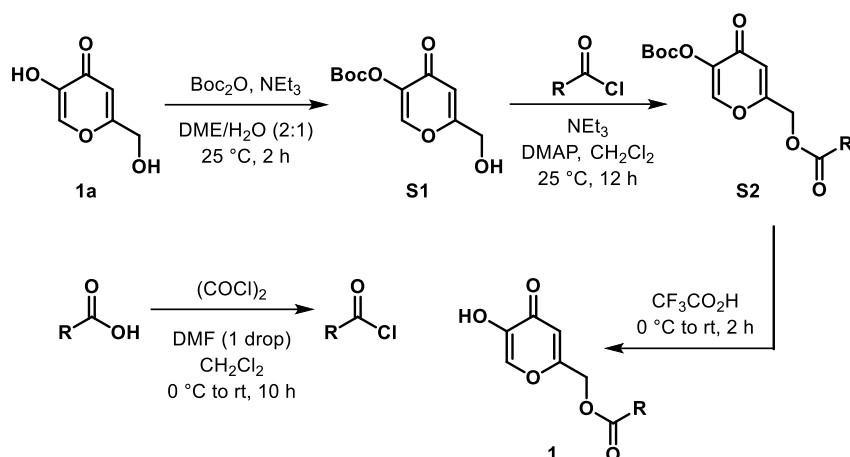

In an oven-dried round-bottom flask, **S1** (1.0 equiv.) was taken along with acyl chloride (1.1 equiv.) and DMAP (0.2 equiv.) under a positive argon pressure. Then CH<sub>2</sub>Cl<sub>2</sub> (9 mL/mmol of **S1**) was added, followed by dropwise addition of NEt<sub>3</sub> (4.0 equiv.) and the resulting mixture was stirred at 25 °C for 24 h under argon until TLC (30% EtOAc in petroleum ether) revealed complete consumption of **S1**. The reaction mixture was quenched with saturated NH<sub>4</sub>Cl solution and diluted with CH<sub>2</sub>Cl<sub>2</sub>. The organic layer was separated, and the aqueous layer was extracted with CH<sub>2</sub>Cl<sub>2</sub>. Combined organic layer was washed with brine, dried over anh. Na<sub>2</sub>SO<sub>4</sub> and concentrated under reduced pressure to obtain a yellow liquid. This residue was purified by silica-gel flash column chromatography (20-25% EtOAc in petroleum ether) to obtain **S2**.

In an oven-dried round-bottom flask equipped with a magnetic stir bar, **S2** (1.0 equiv.) was taken in dry CH<sub>2</sub>Cl<sub>2</sub> (6 mL/mmol of **S2**) under a positive argon pressure, followed by addition of trifluoroacetic acid (TFA) (6.0 equiv.) dropwise at 0 °C. The resulting mixture was gradually allowed to attain ambient temperature and stirred for 4-8 h under argon until TLC (30% EtOAc in petroleum ether) revealed complete consumption of **S2**. The reaction mixture was quenched with saturated NaHCO<sub>3</sub> solution and diluted with CH<sub>2</sub>Cl<sub>2</sub>. The organic layer was separated, and the aqueous layer was extracted with CH<sub>2</sub>Cl<sub>2</sub>. Combined organic layer was washed with brine, dried over anh. Na<sub>2</sub>SO<sub>4</sub> and concentrated under reduced pressure to obtain a yellow liquid. This residue was purified by silica-gel flash column chromatography to obtain kojic acid derivative **1**.

**Compound 1i:** Prepared according to the general procedure A; Purified by silica-gel flash column chromatography (1-4% methanol in CH<sub>2</sub>Cl<sub>2</sub>); Yellow sticky liquid (205.0 mg, 0.425 mmol, 26% yield over 3 steps); **m.p.** 135-136 °C;

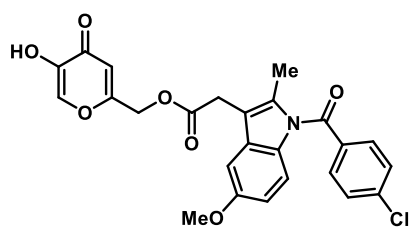

**FT-IR (Thin film):** 3443 (br), 2956 (w), 2926 (m), 2840 (w), 1746 (s), 1681 (s), 1650 (s), 1593 (s), 1478 (m), 1457 (m), 1322 (m), 1215 (m), 1143 (m) cm<sup>-1</sup>; **<sup>1</sup>H-NMR (400 MHz, CDCl<sub>3</sub>):**  $\delta$  7.77 (s, 1H), 7.66 (d,  $J$  = 8.3 Hz, 2H), 7.47 (d,  $J$  = 8.3 Hz, 2H), 6.93 (d,  $J$  = 2.3

Hz, 1H), 6.85 (d,  $J$  = 9.0 Hz, 1H), 6.67 (dd,  $J$  = 9.0, 2.3 Hz, 1H), 6.39 (s, 1H), 4.94 (s, 2H), 3.81 (s, 3H), 3.76 (s, 2H), 2.39 (s, 3H); **<sup>13</sup>C-NMR (100 MHz, CDCl<sub>3</sub>):**  $\delta$  173.9, 169.9, 168.4, 162.6, 156.2,

146.0, 139.5, 138.2, 136.3, 133.8, 131.3, 130.9, 130.4, 129.3, 115.1, 111.7, 111.6, 111.3, 101.4, 61.8, 55.8, 30.1, 13.4; **HRMS (ESI+)**:  $m/z$  calcd. for C<sub>25</sub>H<sub>21</sub>ClNO<sub>7</sub> ([M+H]<sup>+</sup>): 482.1007, Found: 482.1009.

**Compound 1j**: Prepared according to general procedure A; Purified by silica-gel flash column chromatography (1-4% methanol in CH<sub>2</sub>Cl<sub>2</sub>); Yellow sticky liquid

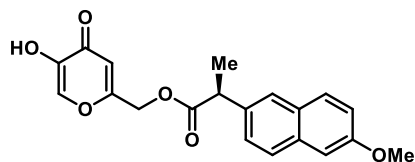

(200.0 mg, 0.570 mmol, 29% yield over 3 steps); **m.p.** 142-143 °C; **FT-IR (Thin film)**: 3350 (br), 2936 (w), 1741 (s), 1620 (m), 1454 (m), 1371 (m), 1260 (m), 1167 (m) cm<sup>-1</sup>; **<sup>1</sup>H-NMR (400 MHz, CDCl<sub>3</sub>)**:  $\delta$  7.73-7.69 (m, 3H), 7.66 (s, 1H), 7.39-7.37 (m, 1H), 7.17-

7.12 (m, 2H), 6.37 (s, 1H), 4.95-4.86 (m, 2H), 3.97-3.92 (m, 1H), 3.92 (s, 3H), 1.62 (d,  $J = 7.1$  Hz, 3H); **<sup>13</sup>C-NMR (100 MHz, CDCl<sub>3</sub>)**:  $\delta$  173.9, 173.7, 162.9, 157.9, 145.9, 137.8, 134.7, 134.0, 129.4, 129.0, 127.5, 126.2, 126.0, 119.4, 111.1, 105.8, 61.7, 55.5, 45.3, 18.5; **HRMS (ESI+)**:  $m/z$  calcd. for C<sub>20</sub>H<sub>19</sub>O<sub>6</sub> ([M+H]<sup>+</sup>): 355.1182, Found: 355.1182.

**Compound 1l**: Prepared according to general procedure A; Purified by silica-gel flash column chromatography (35-42% EtOAc in petroleum ether); Yellow liquid

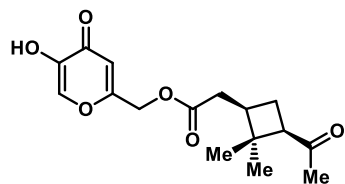

(241.0 mg, 0.781 mmol, 24% yield over 3 steps); **m.p.** 82-83 °C; **FT-IR (Thin film)**: 3424 (br), 2956 (m), 2923 (m), 2854 (m), 1743 (s), 1701 (s), 1651 (s), 1456 (m), 1211 (s), 1163 (s) cm<sup>-1</sup>; **<sup>1</sup>H-NMR (400 MHz, CDCl<sub>3</sub>)**:  $\delta$  7.82 (s, 1H), 6.45 (s, 1H), 4.86 (s, 2H), 2.93-2.82 (m, 1H), 2.42-2.29 (m,

3H), 2.03-1.99 (m, 1H), 1.99 (s, 3H), 1.90-1.86 (m, 1H), 1.26 (s, 3H), 0.81 (s, 3H); **<sup>13</sup>C-NMR (100 MHz, CDCl<sub>3</sub>)**:  $\delta$  207.4, 174.2, 171.7, 162.7, 146.1, 138.7, 111.7, 61.3, 54.1, 43.2, 37.8, 34.7, 30.2, 23.0, 17.3; **HRMS (ESI+)**:  $m/z$  calcd. for C<sub>16</sub>H<sub>20</sub>O<sub>6</sub>Na ([M+Na]<sup>+</sup>): 331.1158, Found: 331.1159.

**General procedure B**: kojic acid derivative **1k** was prepared according to the following procedure:

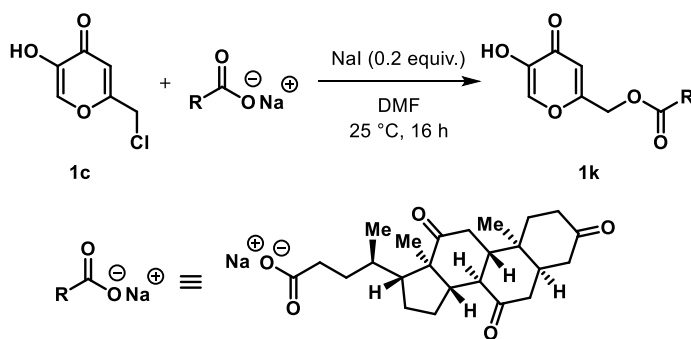

In an oven dried 25 mL round-bottom flask equipped with a magnetic stir bar, **1c** (200 mg, 1.245 mmol, 1.0 equiv.), sodium dehydrocholate (634 mg, 1.495 mmol, 1.2 equiv.) and NaI (37 mg, 0.249 mmol, 0.2 equiv.) were taken with 4 mL of dry DMF under a positive argon pressure. The resulting solution was then stirred at 25 °C for 16 h to obtain a grey-coloured heterogeneous solution. The resulting mixture was diluted with 10 mL of distilled water and 10 mL of diethyl ether. The organic layer was separated and washed with distilled water (10 mL  $\times$  3). The combined organic layer was

washed with brine (20 mL), dried over anh. Na<sub>2</sub>SO<sub>4</sub> and concentrated under reduced pressure to obtain a yellow liquid. This residue was purified by silica-gel flash column chromatography (1-2% methanol in CH<sub>2</sub>Cl<sub>2</sub>) to obtain **1k** as a yellow liquid (420 mg, 0.797 mmol, 64% yield); **m.p.** 173-174 °C; **FT-IR (Thin film):** 3392 (br), 2947 (w), 2875 (w), 1703 (s), 1628 (m), 1372 (s), 1258 (m), 1166 (s) cm<sup>-1</sup>; **<sup>1</sup>H-NMR (400 MHz, CDCl<sub>3</sub>):**  $\delta$  7.84 (s, 1H), 6.48 (s, 1H), 4.92 (s, 2H), 2.94-2.81 (m, 4H), 2.36-2.12 (m, 14H), 2.05-2.01 (m, 5H), 1.89-1.81 (m, 3H), 1.66-1.61 (m, 2H), 1.40 (s, 3H), 1.06 (s, 3H), 0.86 (d, *J* = 6.5 Hz, 3H); **<sup>13</sup>C-NMR (100 MHz, CDCl<sub>3</sub>):**  $\delta$  212.1, 209.3, 208.8, 177.8, 174.0, 173.1, 163.2, 146.0, 138.1, 111.3, 61.3, 57.0, 51.9, 49.1, 47.0, 45.7, 45.1, 42.9, 38.8, 36.6, 36.1, 35.6, 35.4, 31.2, 30.4, 27.8, 25.2, 22.0, 18.7, 12.0; **HRMS (ESI+):** *m/z* calcd. for C<sub>30</sub>H<sub>39</sub>O<sub>8</sub> ([M+H]<sup>+</sup>): 527.2645, Found: 527.2642.

#### D. Procedure for the synthesis of allylic alcohols:

Allylic alcohols (**2a-r**) were prepared according to the previously reported procedure by the reaction of the corresponding aldehydes with vinyl magnesium bromide.<sup>6</sup>

#### E. Preliminary studies on asymmetric allylic alkylation of kojic acid:

➤ Reaction with branched allylic carbonate:

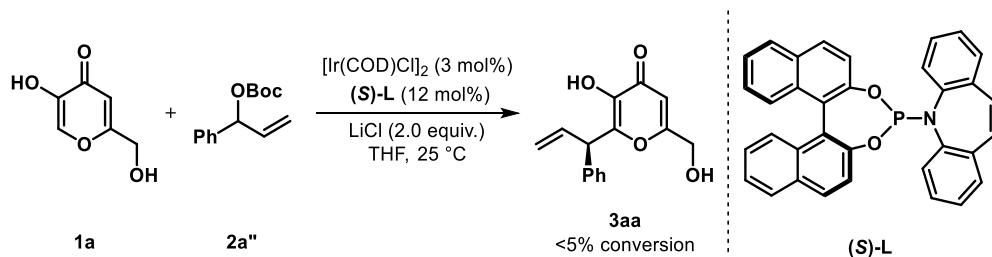

➤ Reaction with branched allylic alcohol:

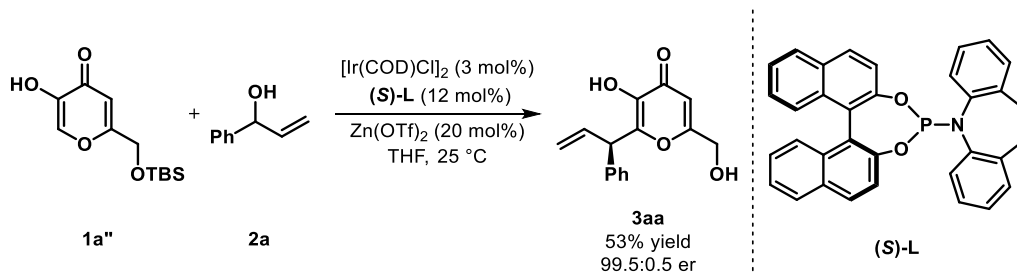

<sup>6</sup> a) C. Defieber, M. A. Ariger, P. Moriel and E. M. Carreira, *Angew. Chem., Int. Ed.*, 2007, **46**, 3139-3143. b) M. Lafrance, M. Roggen and E. M. Carreira, *Angew. Chem. Int. Ed.*, 2012, **51**, 3470-3473. (c) M. Roggen and E. M. Carreira, *Angew. Chem., Int. Ed.*, 2012, **51**, 8652-8655.

## F. Promoter and reaction conditions optimization for asymmetric allylic alkylation of kojic acid:

**Table S1.** Promoter screening and reaction conditions optimization

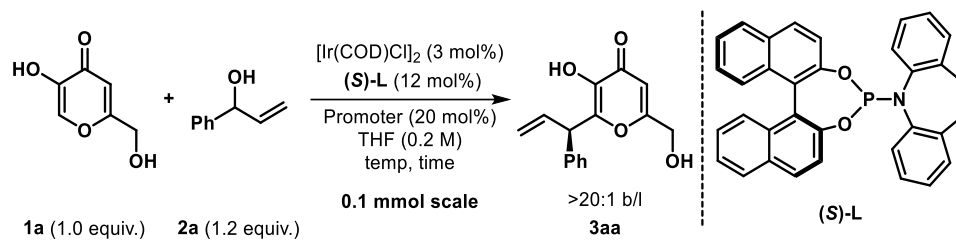

| entry          | promoter             | temp | time (h) | yield (%) <sup>a</sup> | er <sup>b</sup> |
|----------------|----------------------|------|----------|------------------------|-----------------|
| 1              | -                    | 25   | 24       | <5                     | n.d.            |
| 2              | Zn(OTf) <sub>2</sub> | 25   | 48       | 52 (50)                | 99.8:0.2        |
| 3              | Zn(OTf) <sub>2</sub> | 50   | 24       | 54                     | 99.9:0.1        |
| 4 <sup>c</sup> | Zn(OTf) <sub>2</sub> | 25   | 36       | 73                     | 99.9:0.1        |
| 5              | Sc(OTf) <sub>3</sub> | 25   | 36       | 62                     | 99.9:0.1        |
| 6              | Fe(OTf) <sub>2</sub> | 25   | 24       | 81                     | 99.9:0.1        |
| 7              | La(OTf) <sub>3</sub> | 25   | 36       | 39                     | 99.9:0.1        |
| 8 <sup>c</sup> | Fe(OTf) <sub>2</sub> | 25   | 24       | 95 (85)                | 99.9:0.1        |
| 9 <sup>d</sup> | Fe(OTf) <sub>2</sub> | 25   | 22       | (91)                   | 99.9:0.1        |

<sup>a</sup>Yields were determined by <sup>1</sup>H-NMR spectroscopy with mesitylene as the internal standard. Isolated yields are given in the parentheses.

<sup>b</sup>Enantiomeric ratio (er) was determined by HPLC analysis on a chiral stationary phase. <sup>c</sup>Reaction with 2.0 equiv. of **2a**. <sup>d</sup>Reaction with 1.5 equiv. of **2a** on a 0.2 mmol scale. n.d. = not determined.

**Table S2.** Optimization of solvent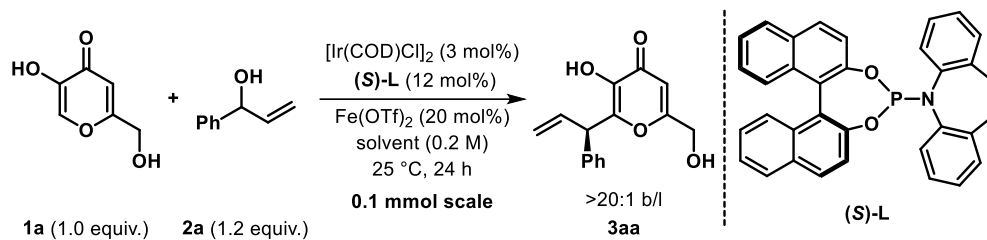

| entry | solvent         | yield (%) <sup>a</sup> | er <sup>b</sup> |
|-------|-----------------|------------------------|-----------------|
| 1     | Toluene         | 54 (50)                | >99.5:0.5       |
| 2     | 1,4-dioxane     | 64 (62)                | >99.5:0.5       |
| 3     | $\text{CHCl}_3$ | <10                    | n.d.            |
| 4     | 2-Me-THF        | (72)                   | >99.9:0.1       |
| 5     | THF             | 81                     | 99.9:0.1        |
| 6     | Acetone         | 75                     | >99.9:0.1       |
| 7     | DCE             | <10                    | n.d.            |

<sup>a</sup>Yields were determined by <sup>1</sup>H-NMR spectroscopy with mesitylene as the internal standard. Isolated yields are given in the parentheses. <sup>b</sup>Enantiomeric ratio (er) was determined by HPLC analysis on a chiral stationary phase. n.d. = not determined.



**Table S3.** Optimization of other reaction parameters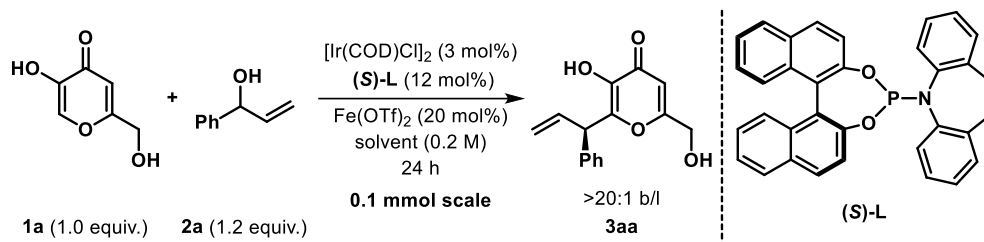

| entry | deviation from the standard reaction conditions | yield (%) <sup>a</sup> | er <sup>b</sup> |
|-------|-------------------------------------------------|------------------------|-----------------|
| 1     | $\text{Fe}(\text{OTf})_2$ (10 mol%)             | 84                     | 99.9:0.1        |
| 2     | $\text{Fe}(\text{OTf})_2$ (50 mol%)             | 87                     | >99.9:0.1       |
| 3     | THF (0.1M)                                      | 81                     | >99.9:0.1       |
| 4     | 12 h instead of 24 h                            | 87                     | >99.9:0.1       |

<sup>a</sup>Yields were determined by <sup>1</sup>H-NMR spectroscopy with mesitylene as the internal standard. <sup>b</sup>Enantiomeric ratio (er) was determined by HPLC analysis on a chiral stationary phase.

### G. General procedure for the preparation of racemic products (*rac-3*):

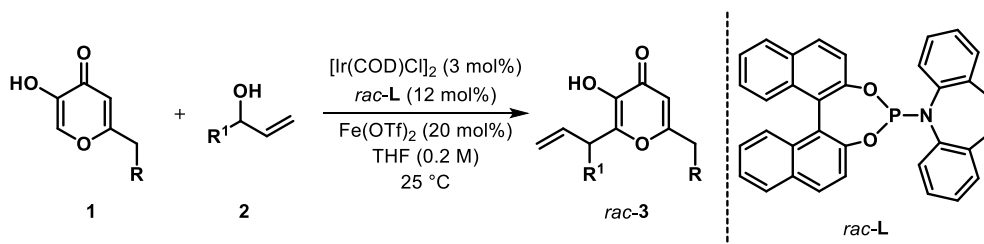

In a glass-vial  $[\text{Ir}(\text{COD})\text{Cl}]_2$  (0.003 mmol, 3 mol%) and ligand *rac-L* (0.012 mmol, 12 mol%) were taken with 0.1 mL of dry THF, and the resulting solution was stirred at ambient temperature for 15 min. To this solution, *rac-2* (0.150 mmol, 1.5 equiv.) in 0.2 mL of dry THF was added followed by addition of **1** (0.100 mmol, 1.0 equiv.) and  $\text{Fe}(\text{OTf})_2$  (0.02 mmol, 0.2 equiv.) in 0.2 mL of dry THF. The resulting suspension was stirred at 25 °C for 24–36 h. The crude reaction mixture was purified by preparative TLC (Merck silica-gel 60 F<sub>254</sub> pre-coated plates of 0.25 mm thickness) to obtain the racemic  $\beta$ -allylic kojic acid (*rac-3*) samples for HPLC analysis.

**H. General procedure for the Ir-catalyzed asymmetric allylic alkylation of kojic acid:**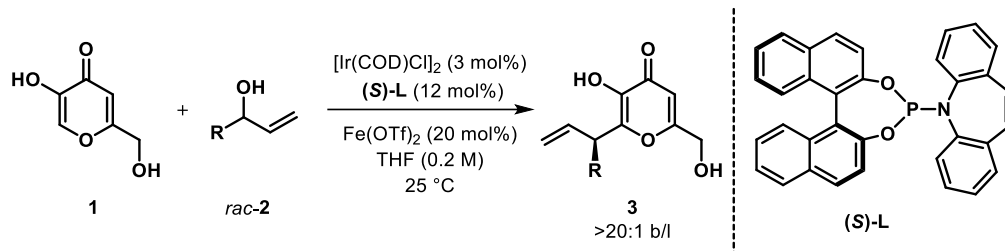

In an oven and vacuum-dried reaction tube equipped with a magnetic stir bar, [Ir(COD)Cl]<sub>2</sub> (4 mg, 0.006 mmol, 3 mol%) and (S)-L (12.2 mg, 0.024 mmol, 12 mol%) were taken with 0.3 mL of dry THF under a positive argon pressure. The solution was then stirred vigorously at 25 °C for 15 min to obtain a deep red solution. A solution of allylic alcohol *rac*-2 (0.3 mmol, 1.5 equiv.) in 0.7 mL of dry THF was then added to this red solution and stirred at 25 °C for 5 min. Subsequently, kojic acid **1** (0.2 mmol, 1.0 equiv.) was added followed by Fe(OTf)<sub>2</sub> (14.2 mg, 0.04 mmol, 0.2 equiv.). The reaction tube was purged with argon, closed with a glass stopper, and stirred at 25 °C until TLC (5% methanol in CH<sub>2</sub>Cl<sub>2</sub>) revealed complete consumption of **1**. The reaction mixture was then diluted with 2 mL of CH<sub>2</sub>Cl<sub>2</sub> and 2 mL of 1(N) HCl. The organic layer was separated, and the aqueous layer was extracted with CH<sub>2</sub>Cl<sub>2</sub> (4 mL × 3). Combined organic layer was washed with brine (10 mL), dried over anh. Na<sub>2</sub>SO<sub>4</sub> and concentrated under reduced pressure to obtain a yellow liquid. This residue was purified by silica-gel flash column chromatography (1-3% methanol in CH<sub>2</sub>Cl<sub>2</sub>) to obtain  $\beta$ -allylic kojic acid **3**.

**Compound 3aa:** Reaction was performed on a 0.2 mmol scale; purified by silica-gel flash column chromatography (1-2% methanol in CH<sub>2</sub>Cl<sub>2</sub>); yellow sticky liquid (47.0 mg, 0.182 mmol, 91% yield); **FT-IR (Thin film):** 3306 (w), 2923 (w), 2853 (w), 1651 (s), 1623 (s), 1580 (s), 1455 (s), 1204 (s), 1092 (m) cm<sup>-1</sup>; **<sup>1</sup>H-NMR (400 MHz, CDCl<sub>3</sub>):**  $\delta$  7.34-7.28 (m, 4H), 7.26-7.24 (m, 1H), 6.52 (s, 1H), 6.26 (ddd, *J* = 17.3, 10.1, 7.5 Hz, 1H), 5.30 (d, *J* = 10.1 Hz, 1H), 5.22 (d, *J* = 17.1 Hz, 1H), 5.08 (d, *J* = 7.3 Hz, 1H), 4.49-4.41 (m, 2H); **<sup>13</sup>C-NMR (100 MHz, CDCl<sub>3</sub>):**  $\delta$  174.5, 167.8, 150.6, 141.5, 139.0, 135.2, 128.8, 128.2, 127.4, 118.4, 108.6, 61.1, 47.8; **HRMS (ESI+):** *m/z* calcd. for C<sub>15</sub>H<sub>15</sub>O<sub>4</sub> ([M+H]<sup>+</sup>): 259.0970, Found: 259.0968; **Optical rotation:** [ $\alpha$ ]<sub>D</sub><sup>22</sup> -104.6 (*c* 2.0, CHCl<sub>3</sub>) for an enantiomerically enriched sample with 99.9:0.1 er. The enantiomeric ratio was determined by HPLC analysis using Phenomenex Cellulose-1 column (85:15 *n*-Hexane/*i*-PrOH, flow rate = 1.0 mL/min, 20 °C, I = 277 nm,  $\tau_{\text{minor}}$  = 7.8 min,  $\tau_{\text{major}}$  = 9.1 min. See Supporting Information: Part B for HPLC chromatograms. The absolute stereochemistry of the product **3aa** was assigned in analogy with **8**.

**Compound 3ab:** Reaction was performed on a 0.2 mmol scale; purified by silica-gel flash column chromatography (1-3% methanol in CH<sub>2</sub>Cl<sub>2</sub>); Yellow liquid (51.0 mg, 0.186 mmol, 93% yield); **FT-IR (Thin film):** 3332 (br), 2958 (w), 2921 (w), 2850 (w), 1655 (s), 1622 (s), 1577 (s), 1511 (s), 1456 (m), 1204 (s), 1091 (m) cm<sup>-1</sup>; **<sup>1</sup>H-NMR (400 MHz, CDCl<sub>3</sub>):**  $\delta$  7.18 (d, *J* = 7.5 Hz, 2H), 7.12 (d, *J* = 7.6 Hz, 2H), 6.54 (s, 1H), 6.28-6.20 (m, 1H), 5.27 (d, *J* = 10.0 Hz, 1H), 5.19 (d, *J* = 17.1 Hz, 1H), 5.06 (d, *J* = 7.1 Hz,

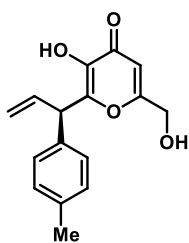

1H), 4.48-4.40 (m, 2H), 2.31 (s, 3H); <sup>13</sup>C-NMR (100 MHz, CDCl<sub>3</sub>):  $\delta$  174.5, 167.9, 151.0, 141.4, 137.1, 136.0, 135.4, 129.5, 128.0, 118.2, 108.6, 61.0, 47.4, 21.1; HRMS (ESI+):  $m/z$  calcd. for C<sub>16</sub>H<sub>17</sub>O<sub>4</sub> ([M+H]<sup>+</sup>): 273.1127, Found: 273.1130; Optical rotation:  $[\alpha]_D^{22}$  -93.2 (*c* 2.0, CHCl<sub>3</sub>) for an enantiomerically enriched sample with >99.9:0.1 er. The enantiomeric ratio was determined by HPLC analysis using Daicel Chiralpak AS-H column (90:10 *n*-Hexane/*i*-PrOH, flow rate = 1.0 mL/min, 20 °C, I = 285 nm,  $\tau_{\text{major}}$  = 19.9 min). See Supporting Information: Part B for HPLC chromatograms. The absolute stereochemistry of the product **3ab** was assigned in analogy with **8**.

**Compound 3ac:** Reaction was performed on a 0.2 mmol scale; purified by silica-gel flash column chromatography (1-3% methanol in CH<sub>2</sub>Cl<sub>2</sub>); Yellow liquid (56.0 mg, 0.186 mmol, 93% yield); FT-IR (Thin film): 3300 (br), 2961 (m), 2925 (w), 2868 (w), 1656 (s), 1623 (s), 1578 (s), 1511 (s), 1457 (m), 1202 (s), 1092 (m) cm<sup>-1</sup>; <sup>1</sup>H-NMR (400 MHz, CDCl<sub>3</sub>):  $\delta$  7.22 (d, *J* = 7.7 Hz, 2H), 7.17 (d, *J* = 7.8 Hz, 2H), 6.56 (s, 1H), 6.29-6.21 (m, 1H), 5.26 (d, *J* = 10.1 Hz, 1H), 5.20 (d, *J* = 17.0 Hz, 1H), 5.07 (d, *J* = 7.4 Hz, 1H), 4.49-4.41 (m, 2H), 2.87 (sep, *J* = 6.8 Hz, 1H), 1.22 (d, *J* = 6.8 Hz, 6H); <sup>13</sup>C-

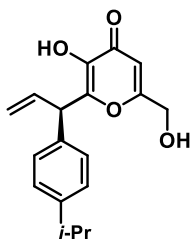

NMR (100 MHz, CDCl<sub>3</sub>):  $\delta$  174.6, 168.0, 151.1, 148.0, 141.4, 136.3, 135.4, 128.1, 126.9, 118.2, 108.6, 61.0, 47.5, 33.8, 24.0; HRMS (ESI+):  $m/z$  calcd. for C<sub>18</sub>H<sub>21</sub>O<sub>4</sub> ([M+H]<sup>+</sup>): 301.1440, Found: 301.1438; Optical rotation:  $[\alpha]_D^{21}$  -96.6 (*c* 2.0, CHCl<sub>3</sub>) for an enantiomerically enriched sample with >99.9:0.1 er. The enantiomeric ratio was determined by HPLC analysis using Daicel Chiralpak IH column (90:10 *n*-Hexane/*i*-PrOH, flow rate = 1.0 mL/min, 20 °C, I = 277 nm,  $\tau_{\text{major}}$  = 13.8 min. See Supporting Information: Part B for HPLC chromatograms. The absolute stereochemistry of the product **3ac** was assigned in analogy with **8**.

**Compound 3ad:** Reaction was performed on a 0.2 mmol scale; purified by silica-gel flash column chromatography (1-2% methanol in CH<sub>2</sub>Cl<sub>2</sub>); yellow liquid (41.0 mg, 0.142 mmol, 71% yield); FT-IR (Thin film): 3288 (br), 2958 (s), 2919 (s), 2844 (m), 1654 (s), 1617 (s), 1579 (s), 1510 (s), 1458 (s), 1250 (s), 1032 (m) cm<sup>-1</sup>; <sup>1</sup>H-NMR (400 MHz, CDCl<sub>3</sub>):  $\delta$  7.20 (d, *J* = 8.5 Hz, 2H), 6.84 (d, *J* = 8.5 Hz, 2H), 6.52 (s, 1H), 6.22 (ddd, *J* = 17.3, 10.1, 7.4, Hz, 1H), 5.26 (d, *J* = 10.1 Hz, 1H), 5.17 (d, *J* = 17.1 Hz, 1H), 5.03 (d, *J* = 7.2 Hz, 1H), 4.48-4.39 (m, 2H), 3.77 (s, 3H); <sup>13</sup>C-NMR (100 MHz, CDCl<sub>3</sub>):  $\delta$

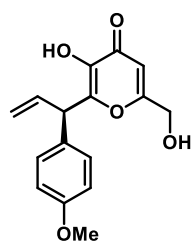

174.4, 167.7, 158.9, 150.8, 141.3, 135.5, 131.1, 129.2, 118.1, 114.2, 108.6, 61.1, 55.4, 47.0; HRMS (ESI+):  $m/z$  calcd. for C<sub>16</sub>H<sub>16</sub>O<sub>5</sub>Na ([M+Na]<sup>+</sup>): 311.0895, Found: 311.0899; Optical rotation:  $[\alpha]_D^{22}$  -83.8 (*c* 2.0, CHCl<sub>3</sub>) for an enantiomerically enriched sample with 99.5:0.5 er. The enantiomeric ratio was determined by HPLC analysis using Daicel Chiralpak IG column (85:15 *n*-Hexane/*i*-PrOH, flow rate = 1.0 mL/min, 20 °C, I = 279 nm,  $\tau_{\text{minor}}$  = 22.5 min,  $\tau_{\text{major}}$  = 27.2 min). See Supporting Information: Part B for HPLC chromatograms. The absolute stereochemistry of the product **3ad** was assigned in analogy with **8**.

**Compound 3ae:** Reaction was performed on a 0.2 mmol scale; purified by silica-gel flash column chromatography (1-2% methanol in CH<sub>2</sub>Cl<sub>2</sub>); Yellow sticky liquid (40.0 mg, 0.122 mmol, 61% yield);

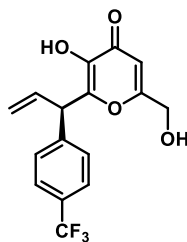

**FT-IR (Thin film):** 3363 (br), 2962 (m), 2927 (w), 2870 (w), 1735 (m), 1657 (s), 1623 (s), 1582 (m), 1457 (m), 1327 (s), 1124 (m) cm<sup>-1</sup>; **<sup>1</sup>H-NMR (400 MHz, CDCl<sub>3</sub>):**  $\delta$  7.57 (d,  $J$  = 7.8 Hz, 2H), 7.41 (d,  $J$  = 7.9 Hz, 2H), 6.54 (s, 1H), 6.23 (ddd,  $J$  = 17.3, 9.8, 7.8, Hz, 1H), 5.34 (d,  $J$  = 10.1 Hz, 1H), 5.24 (d,  $J$  = 17.0 Hz, 1H), 5.13 (d,  $J$  = 7.3 Hz, 1H), 4.50-4.42 (m, 2H); **<sup>13</sup>C-NMR (100**

**MHz, CDCl<sub>3</sub>):**  $\delta$  174.3, 167.6, 149.5, 143.0, 141.7, 134.3, 129.7 (q,  $J$  = 32.5 Hz), 128.6, 125.8 (q,  $J$  = 3.8 Hz), 124.1 (q,  $J$  = 272.0 Hz), 119.3, 108.8, 61.1, 47.6; **HRMS (ESI+):**  $m/z$  calcd. for C<sub>16</sub>H<sub>14</sub>F<sub>3</sub>O<sub>4</sub> ([M+H]<sup>+</sup>): 327.0844, Found: 327.0842; **Optical rotation:**  $[\alpha]_D^{22}$  -80.9 ( $c$  1.0, CHCl<sub>3</sub>) for an enantiomerically enriched sample with >99.9:0.1 er. The enantiomeric ratio was determined by HPLC analysis using Daicel Chiralpak AD-H column (95:5 *n*-Hexane/*i*-PrOH, flow rate = 1.0 mL/min, 20 °C, I = 275 nm,  $\tau_{\text{major}}$  = 38.2 min). See Supporting Information: Part B for HPLC chromatograms. The absolute stereochemistry of the product **3ae** was assigned in analogy with **8**.

**Compound 3af:** Reaction was performed on a 0.2 mmol scale; purified by silica-gel flash column chromatography (2-4% methanol in CH<sub>2</sub>Cl<sub>2</sub>); white sticky liquid (23.0 mg, 0.082 mmol, 41% yield);

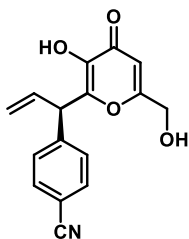

**FT-IR (Thin film):** 3426 (br), 3297 (br), 2922 (w), 2852 (w), 1657 (m), 1626 (s), 1582 (s), 1455 (m), 1204 (m), 1091 (m) cm<sup>-1</sup>; **<sup>1</sup>H-NMR (400 MHz, CDCl<sub>3</sub>):**  $\delta$  7.61 (d,  $J$  = 8.2 Hz, 2H), 7.41 (d,  $J$  = 8.2 Hz, 2H), 6.53 (s, 1H), 6.22 (ddd,  $J$  = 17.4, 10.1, 7.6 Hz, 1H), 5.37 (d,  $J$  = 10.6 Hz, 1H), 5.25 (d,  $J$  = 16.7 Hz, 1H), 5.11 (d,  $J$  = 7.6 Hz, 1H), 4.51-4.42 (m, 2H); **<sup>13</sup>C-NMR (100 MHz, CDCl<sub>3</sub>):**  $\delta$  174.1, 167.3, 148.6, 144.5, 141.8, 133.8, 132.7, 129.0, 119.8, 118.7, 111.4, 108.9, 61.2, 47.9; **HRMS (ESI+):**  $m/z$  calcd.

for C<sub>16</sub>H<sub>14</sub>NO<sub>4</sub> ([M+H]<sup>+</sup>): 284.0923, Found: 284.0921; **Optical rotation:**  $[\alpha]_D^{21}$  -68.1 ( $c$  1.0, CHCl<sub>3</sub>) for an enantiomerically enriched sample with >99.9:0.1 er. The enantiomeric ratio was determined by HPLC analysis using Phenomenex Amylose-2 column (75:25 *n*-Hexane/*i*-PrOH, flow rate = 1.0 mL/min, 20 °C, I = 254 nm,  $\tau_{\text{major}}$  = 16.1 min). See Supporting Information: Part B for HPLC chromatograms. The absolute stereochemistry of the product **3af** was assigned in analogy with **8**.

**Compound 3ag:** Reaction was performed on a 0.2 mmol scale; purified by silica-gel flash column chromatography (1-2% methanol in CH<sub>2</sub>Cl<sub>2</sub>); pale yellow sticky liquid (48.0 mg, 0.174 mmol, 87% yield);

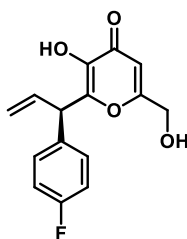

**FT-IR (Thin film):** 3321 (br), 2921 (w), 2847 (w), 1656 (m), 1624 (s), 1579 (s), 1457 (m), 1220 (s), 1090 (m) cm<sup>-1</sup>; **<sup>1</sup>H-NMR (400 MHz, CDCl<sub>3</sub>):**  $\delta$  7.19-7.16 (m, 2H), 6.94-6.90 (m, 2H), 6.46 (s, 1H), 6.18-6.09 (m, 1H), 5.22 (d,  $J$  = 10.1 Hz, 1H), 5.12 (d,  $J$  = 17.3 Hz, 1H), 4.99 (d,  $J$  = 7.2 Hz, 1H), 4.42-4.33 (m, 2H); **<sup>13</sup>C-NMR (100 MHz, CDCl<sub>3</sub>):**  $\delta$  174.5, 167.8, 162.1 (d,  $J$  =

254.8 Hz), 150.4, 141.5, 135.0, 134.6 (d,  $J$  = 3.1 Hz), 129.75 (d,  $J$  = 8.0 Hz), 118.6, 115.7 (d,  $J$  = 21.5 Hz), 108.7, 61.1, 47.0; **HRMS (ESI+):**  $m/z$  calcd. for C<sub>15</sub>H<sub>14</sub>O<sub>4</sub>F ([M+H]<sup>+</sup>): 277.0876, Found: 277.0874; **Optical rotation:**  $[\alpha]_D^{21}$  -89.0 ( $c$  1.0, CHCl<sub>3</sub>) for an enantiomerically enriched sample with >99.9:0.1 er. The enantiomeric ratio was determined by HPLC analysis using Daicel Chiralpak AD-H

column (85:15 *n*-Hexane/*i*-PrOH, flow rate = 1.0 mL/min, 20 °C, I = 283 nm,  $\tau_{\text{major}}$  = 12.1 min. See Supporting Information: Part B for HPLC chromatograms. The absolute stereochemistry of the product **3ag** was assigned in analogy with **8**.

**Compound 3ah:** Reaction was performed on a 0.2 mmol scale; purified by silica-gel flash column chromatography (1-2% methanol in CH<sub>2</sub>Cl<sub>2</sub>); pale yellow sticky liquid (51.0 mg, 0.174 mmol, 87% yield);

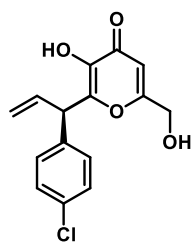

FT-IR (Thin film): 3307 (br), 2923 (w), 2852 (w), 1624 (s), 1583 (s), 1454 (s), 1202 (s), 1091 (m) cm<sup>-1</sup>; <sup>1</sup>H-NMR (400 MHz, CDCl<sub>3</sub>):  $\delta$  7.20 (d, *J* = 8.0 Hz, 2H), 7.14 (d, *J* = 8.2 Hz, 2H), 6.46 (s, 1H), 6.17-6.08 (m, 1H), 5.23 (d, *J* = 8.1 Hz, 1H), 5.12 (d, *J* = 17.1 Hz, 1H), 4.98 (d, *J* = 7.4 Hz, 1H), 4.41-4.32 (m, 2H); <sup>13</sup>C-NMR (100 MHz, CDCl<sub>3</sub>):  $\delta$  174.5, 167.8, 150.2, 141.6, 137.5, 134.7, 133.3, 129.6, 129.0, 118.9, 108.8, 61.0, 47.2; HRMS (ESI<sup>+</sup>): *m/z* calcd. for C<sub>15</sub>H<sub>14</sub>O<sub>4</sub>Cl ([M+H]<sup>+</sup>): 293.0581,

Found: 293.0583; **Optical rotation:** [ $\alpha$ ]<sub>D</sub><sup>20</sup> -109.3 (*c* 1.0, CHCl<sub>3</sub>) for an enantiomerically enriched sample with >99.9:0.1 er. The enantiomeric ratio was determined by HPLC analysis using Daicel Chiralpak AD-H column (85:15 *n*-Hexane/*i*-PrOH, flow rate = 1.0 mL/min, 20 °C, I = 282 nm,  $\tau_{\text{major}}$  = 13.0 min. See Supporting Information: Part B for HPLC chromatograms. The absolute stereochemistry of the product **3ah** was assigned in analogy with **8**.

**Compound 3ai:** Reaction was performed on a 0.2 mmol scale; purified by silica-gel flash column chromatography (1-3% methanol in CH<sub>2</sub>Cl<sub>2</sub>); Yellow sticky liquid (59.0 mg, 0.174 mmol, 87% yield);

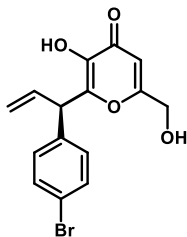

FT-IR (Thin film): 3300 (br), 2959 (m), 2924 (w), 2852 (w), 1656 (s), 1623 (s), 1580 (m), 1456 (m), 1204 (m) cm<sup>-1</sup>; <sup>1</sup>H-NMR (400 MHz, CDCl<sub>3</sub>):  $\delta$  7.43 (d, *J* = 8.1 Hz, 2H), 7.15 (d, *J* = 8.1 Hz, 2H), 6.53 (s, 1H), 6.20 (ddd, *J* = 17.3, 10.0, 7.5, Hz, 1H), 5.30 (d, *J* = 10.1 Hz, 1H), 5.20 (d, *J* = 17.1 Hz, 1H), 5.03 (d, *J* = 7.3 Hz, 1H), 4.48-4.40 (m, 2H); <sup>13</sup>C-NMR (100 MHz, CDCl<sub>3</sub>):  $\delta$  174.4,

167.8, 150.0, 141.6, 138.0, 134.6, 131.9, 129.9, 121.4, 118.9, 108.8, 61.1, 47.2; HRMS (ESI<sup>+</sup>): *m/z* calcd. for C<sub>15</sub>H<sub>14</sub>BrO<sub>4</sub> ([M+H]<sup>+</sup>): 337.0075, Found: 337.0073; **Optical rotation:** [ $\alpha$ ]<sub>D</sub><sup>22</sup> -84.4 (*c* 2.0, CHCl<sub>3</sub>) for an enantiomerically enriched sample with 98.5:1.5 er. The enantiomeric ratio was determined by HPLC analysis using Daicel Chiralpak AD-H column (85:15 *n*-Hexane/*i*-PrOH, flow rate = 1.0 mL/min, 20 °C, I = 222 nm,  $\tau_{\text{minor}}$  = 11.8 min  $\tau_{\text{major}}$  = 13.7 min). See Supporting Information: Part B for HPLC chromatograms. The absolute stereochemistry of the product **3ai** was assigned in analogy with **8**.

**Compound 3aj:** Reaction was performed on a 0.2 mmol scale; purified by silica-gel flash column chromatography (1-2% methanol in CH<sub>2</sub>Cl<sub>2</sub>); pale yellow sticky liquid (50.0 mg,

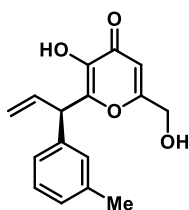

0.183 mmol, 92% yield); FT-IR (Thin film): 3334 (br), 2920 (s), 2847 (w), 1655 (m), 1623 (s), 1579 (s), 1458 (m), 1223 (m), 1091 (w) cm<sup>-1</sup>; <sup>1</sup>H-NMR (400 MHz, CDCl<sub>3</sub>):  $\delta$  7.22-7.18 (m, 1H), 7.10-7.05 (m, 3H), 6.53 (s, 1H), 6.25 (ddd, *J* = 17.5, 10.1, 7.5 Hz, 1H), 5.28 (d, *J* = 10.1 Hz, 1H), 5.21 (d, *J* = 17.2 Hz, 1H), 5.05 (d, *J* =

7.5 Hz, 1H), 4.49-4.40 (m, 2H), 2.32 (s, 3H); <sup>13</sup>C-NMR (100 MHz, CDCl<sub>3</sub>):  $\delta$  174.6, 167.7, 150.8, 141.5, 139.0, 138.5, 135.3, 128.9, 128.7, 128.2, 125.1, 118.3, 108.6, 61.1, 47.8, 21.6; HRMS (ESI<sup>+</sup>):

$m/z$  calcd. for C<sub>16</sub>H<sub>17</sub>O<sub>4</sub> ([M+H]<sup>+</sup>): 273.1127, Found: 273.1128; **Optical rotation:** [ $\alpha$ ]<sub>D</sub><sup>21</sup> -86.0 (*c* 1.0, CHCl<sub>3</sub>) for an enantiomerically enriched sample with >99.9:0.1 er. The enantiomeric ratio was determined by HPLC analysis using Daicel Chiralpak IH column (85:15 *n*-Hexane/*i*-PrOH, flow rate = 1.0 mL/min, 20 °C, I = 215 nm,  $\tau_{\text{major}}$  = 10.9 min. See Supporting Information: Part B for HPLC chromatograms. The absolute stereochemistry of the product **3aj** was assigned in analogy with **8**.

**Compound 3ak:** Reaction was performed on a 0.2 mmol scale; purified by silica-gel flash column chromatography (1-2% methanol in CH<sub>2</sub>Cl<sub>2</sub>); pale yellow sticky liquid (54.0 mg, 0.16 mmol, 80% yield); **FT-IR (Thin film):** 3419 (br), 2921 (w), 2849 (w), 1655 (m), 1623 (s), 1581 (s), 1458 (m), 1223 (m), 1093 (m) cm<sup>-1</sup>; **<sup>1</sup>H-NMR (400 MHz, CDCl<sub>3</sub>):**  $\delta$  7.36 (s, 1H), 7.30 (d, *J* = 7.5 Hz, 1H), 7.15-7.08 (m, 2H), 6.48 (s, 1H), 6.13 (ddd, *J* = 17.5, 10.2, 7.5 Hz, 1H), 5.24 (d, *J* = 9.8 Hz, 1H), 5.14 (d, *J* = 17.6 Hz, 1H), 4.98 (d, *J* = 6.8 Hz, 1H), 4.43-4.34 (m, 2H); **<sup>13</sup>C-NMR (100 MHz, CDCl<sub>3</sub>):**  $\delta$  174.5, 167.9, 150.0, 141.3, 134.4, 131.2, 130.6, 130.4, 128.2, 126.9, 122.9, 119.1, 108.8, 61.0, 47.4; **HRMS (ESI+):**  $m/z$  calcd. for C<sub>15</sub>H<sub>14</sub>O<sub>4</sub>Br ([M+H]<sup>+</sup>): 337.0075, Found: 337.0078; **Optical rotation:** [ $\alpha$ ]<sub>D</sub><sup>22</sup> -77.0 (*c* 1.0, CHCl<sub>3</sub>) for an enantiomerically enriched sample with >99.9:0.1 er. The enantiomeric ratio was determined by HPLC analysis using Daicel Chiralpak AD-H column (90:10 *n*-Hexane/*i*-PrOH, flow rate = 1.0 mL/min, 20 °C, I = 276 nm,  $\tau_{\text{major}}$  = 17.6 min. See Supporting Information: Part B for HPLC chromatograms. The absolute stereochemistry of the product **3ak** was assigned in analogy with **8**.

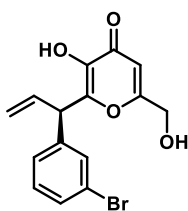

**Compound 3al:** Reaction was performed on a 0.2 mmol scale; purified by silica-gel flash column chromatography (1-3% methanol in CH<sub>2</sub>Cl<sub>2</sub>); Light yellow liquid (37.0 mg, 0.110 mmol, 55% yield); **m.p.** 99-100 °C; **FT-IR (Thin film):** 3420 (br), 2922 (w), 1649 (s), 1619 (s), 1458 (m), 1219 (m), cm<sup>-1</sup>; **<sup>1</sup>H-NMR (400 MHz, CDCl<sub>3</sub>):**  $\delta$  7.57 (dd, *J* = 7.9, 0.9 Hz, 1H), 7.39 (dd, *J* = 7.7, 1.3 Hz, 1H), 7.32-7.29 (m, 1H), 7.14 (t, *J* = 7.5 Hz, 1H), 6.51 (s, 1H), 6.17 (ddd, *J* = 16.8, 10.5, 6.6 Hz, 1H), 5.47 (d, *J* = 6.2 Hz, 1H), 5.33 (d, *J* = 10.3 Hz, 1H), 5.12 (d, *J* = 17.1 Hz, 1H), 4.47-4.39 (m, 2H); **<sup>13</sup>C-NMR (100 MHz, CDCl<sub>3</sub>):**  $\delta$  174.5, 168.1, 149.0, 142.2, 138.0, 134.4, 133.2, 130.3, 129.0, 127.7, 124.6, 118.3, 108.6, 60.9, 47.4; **HRMS (ESI+):**  $m/z$  calcd. for C<sub>15</sub>H<sub>14</sub>BrO<sub>4</sub> ([M+H]<sup>+</sup>): 337.0075, Found: 337.0075; **Optical rotation:** [ $\alpha$ ]<sub>D</sub><sup>22</sup> -22.0 (*c* 4.0, CHCl<sub>3</sub>) for an enantiomerically enriched sample with >99.9:0.1 er. The enantiomeric ratio of compound was determined by HPLC analysis using Daicel Chiralpak AD-H column (85:15 *n*-Hexane/*i*-PrOH, flow rate = 1.0 mL/min, 20 °C, I = 280 nm,  $\tau_{\text{minor}}$  = 10.8 min,  $\tau_{\text{major}}$  = 13.0 min). See Supporting Information: Part B for HPLC chromatograms. The absolute stereochemistry of the product **3al** was assigned in analogy with **8**.

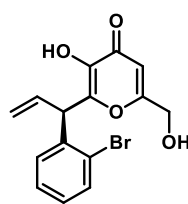

**Compound 3am:** Reaction was performed on a 0.2 mmol scale; purified by silica-gel flash column chromatography (1-3% methanol in CH<sub>2</sub>Cl<sub>2</sub>); Yellow sticky liquid (33.0 mg, 0.100 mmol, 50% yield) [*Note:* compound **3am** is unstable in silica]; **FT-IR (Thin film):** 3414 (br), 2923 (w), 2855 (w), 1625 (s), 1588 (m), 1468 (m), 1204 (m), cm<sup>-1</sup>; **<sup>1</sup>H-NMR (400 MHz, CDCl<sub>3</sub>):**  $\delta$  7.43-7.38 (m, 1H), 7.33-7.31 (m, 1H), 7.23-7.21 (m, 1H), 6.54 (s, 1H), 6.12 (ddd, *J* = 16.9, 10.4, 6.7 Hz, 1H), 5.43 (d, *J* = 6.4 Hz, 1H),

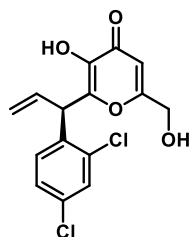

5.31 (d,  $J = 10.1$  Hz, 1H), 5.10 (d,  $J = 17.1$  Hz, 1H), 4.42-4.32 (m, 2H); <sup>13</sup>C-NMR (100 MHz, CDCl<sub>3</sub>):  $\delta$  174.3, 167.8, 148.3, 142.2, 135.0, 134.8, 134.0, 133.8, 130.9, 129.7, 127.4, 118.8, 108.7, 61.0, 44.4; **HRMS (ESI+)**:  $m/z$  calcd. for C<sub>15</sub>H<sub>13</sub>Cl<sub>2</sub>O<sub>4</sub> ([M+H]<sup>+</sup>): 327.0191, Found: 327.0190; **Optical rotation**:  $[\alpha]_D^{22} -59.3$  ( $c$  2.0, CHCl<sub>3</sub>) for an enantiomerically enriched sample with >99.9:0.1 er. The enantiomeric ratio was determined by HPLC analysis using AD-H column (85:15 *n*-Hexane/*i*-PrOH, flow rate = 1.0 mL/min, 20 °C,  $I = 288$  nm,  $\tau_{\text{major}} = 12.4$  min). See Supporting Information: Part B for HPLC chromatograms. The absolute stereochemistry of the product **3am** was assigned in analogy with **8**.

**Compound 3an**: Reaction was performed on a 0.2 mmol scale; purified by silica-gel flash column chromatography (1-2% methanol in CH<sub>2</sub>Cl<sub>2</sub>); pale yellow sticky liquid (28.0 mg, 0.08 mmol, 40% yield) [*Note*: compound **3an** is unstable in silica]; **FT-IR (Thin film)**: 3424 (br), 2923 (s), 2851 (m), 1653 (m), 1589 (s), 1461 (m), 1217 (m), 1081 (w) cm<sup>-1</sup>; **<sup>1</sup>H-NMR (400 MHz, CDCl<sub>3</sub>)**:  $\delta$  7.82 (s, 1H), 6.54 (s, 1H), 6.20-6.11 (m, 1H), 5.46-5.38 (m, 2H), 5.23 (d,  $J = 8.1$  Hz, 1H), 4.41-4.29 (m, 2H); **<sup>13</sup>C-NMR (100 MHz, CDCl<sub>3</sub>)**:  $\delta$  174.1, 173.6, 164.7, 163.8, 146.42, 146.40, 146.30, 146.27, 146.2,

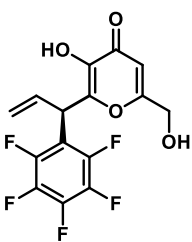

145.9, 143.9, 143.85, 143.81, 143.78, 143.7, 142.8, 142.7, 142.0, 140.22, 140.16, 139.2, 139.1, 138.96, 137.8, 136.75, 136.69, 136.6, 136.4, 134.8, 133.8, 120.3, 119.7, 119.0, 110.9, 74.7, 66.6; **HRMS (ESI+)**:  $m/z$  calcd. for C<sub>15</sub>H<sub>9</sub>O<sub>4</sub>F<sub>5</sub>Na ([M+Na]<sup>+</sup>): 371.0319, Found: 371.0321; **Optical rotation**:  $[\alpha]_D^{21} -59.5$  ( $c$  1.0, CHCl<sub>3</sub>) for an enantiomerically enriched sample with >99.9:0.1 er. The enantiomeric ratio was determined by HPLC analysis using Daicel Chiralpak AD-H column (90:10 *n*-Hexane/*i*-PrOH, flow rate = 1.0 mL/min, 20 °C,  $I = 241$  nm,  $\tau_{\text{major}} = 22.7$  min). See Supporting Information: Part B for HPLC chromatograms. The absolute stereochemistry of the product **3an** was assigned in analogy with **8**.

**Compound 3ao**: Reaction was performed on a 0.2 mmol scale; purified by silica-gel flash column chromatography (1-3% methanol in CH<sub>2</sub>Cl<sub>2</sub>); colourless sticky liquid (59.0 mg, 0.192 mmol, 96% yield); **FT-IR (Thin film)**: 3407 (br), 2924 (m), 2853 (m), 1654 (s), 1622 (s), 1578 (s), 1455 (m), 1200 (m) cm<sup>-1</sup>; **<sup>1</sup>H-NMR (400 MHz, CDCl<sub>3</sub>)**:  $\delta$  8.14 (d,  $J = 8.3$  Hz, 1H), 7.84 (d,  $J = 7.6$  Hz, 1H), 7.78 (d,  $J = 8.0$  Hz, 1H), 7.53-7.43 (m, 4H), 6.45 (s, 1H), 6.35 (ddd,  $J = 16.8, 10.2, 6.2$  Hz, 1H), 5.85 (d,  $J = 6.0$  Hz, 1H), 5.36 (d,  $J = 10.2$  Hz, 1H), 5.16 (d,  $J = 17.2$  Hz, 1H), 4.36 (d,  $J = 15.4$  Hz, 1H), 4.27 (d,  $J = 15.4$  Hz, 1H); **<sup>13</sup>C-NMR (100 MHz, CDCl<sub>3</sub>)**:  $\delta$  174.2, 167.5, 149.5, 141.6, 135.4, 134.8, 134.0, 131.6, 129.0, 128.3, 126.8, 126.4, 126.0, 125.4, 123.2, 118.0, 108.5, 61.1, 43.3; **HRMS (ESI+)**:  $m/z$  calcd. for C<sub>19</sub>H<sub>17</sub>O<sub>4</sub> ([M+H]<sup>+</sup>): 309.1127, Found: 309.1127; **Optical rotation**:  $[\alpha]_D^{22} -113.4$  ( $c$  2.0, CHCl<sub>3</sub>) for an enantiomerically enriched sample with >99.9:0.1 er. The enantiomeric ratio was determined by HPLC analysis using Daicel Chiralpak IH column (85:15 *n*-Hexane/*i*-PrOH, flow rate = 1.0 mL/min, 20 °C,  $I = 281$  nm,  $\tau_{\text{major}} = 15.0$  min). See Supporting Information: Part B for HPLC chromatograms. The absolute stereochemistry of the product **3ao** was assigned in analogy with **8**.

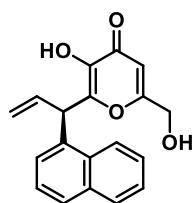

**Compound 3ap:** Reaction was performed on a 0.2 mmol scale; purified by silica-gel flash column chromatography (1-2% methanol in CH<sub>2</sub>Cl<sub>2</sub>); colourless sticky liquid (58.0 mg, 0.188 mmol, 94% yield);

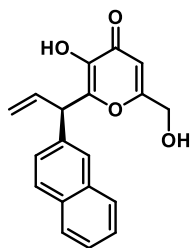

**FT-IR (Thin film):** 3423 (br), 2922 (w), 2852 (w), 1656 (s), 1624 (s), 1586 (s), 1458 (w), 1259 (w), 1092 (m) cm<sup>-1</sup>; **<sup>1</sup>H-NMR (400 MHz, CDCl<sub>3</sub>):**  $\delta$  7.78-7.73 (m, 4H), 7.45-7.40 (m, 3H), 6.53 (s, 1H), 6.35 (ddd,  $J = 17.2, 10.1, 7.1$  Hz, 1H), 5.34 (d,  $J = 10.1$  Hz, 1H), 5.29-5.24 (m, 2H), 4.45-4.35 (m, 2H); **<sup>13</sup>C-NMR (100 MHz, CDCl<sub>3</sub>):**  $\delta$  174.5, 167.8, 150.7, 141.7, 136.5, 135.1, 133.5, 132.6, 128.5,

127.9, 127.7, 126.9, 126.4, 126.3, 126.1, 118.7, 108.7, 61.0, 47.9; **HRMS (ESI+):**  $m/z$  calcd. for C<sub>19</sub>H<sub>17</sub>O<sub>4</sub> ([M+H]<sup>+</sup>): 309.1127, Found: 309.1125; **Optical rotation:**  $[\alpha]_D^{22} -146.3$  ( $c$  1.0, CHCl<sub>3</sub>) for an enantiomerically enriched sample with >99.9:0.1 er. The enantiomeric ratio was determined by HPLC analysis using Daicel Chiralpak IH column (85:15 *n*-Hexane/*i*-PrOH, flow rate = 1.0 mL/min, 20 °C, I = 221 nm,  $\tau_{\text{major}} = 17.8$  min. See Supporting Information: Part B for HPLC chromatograms. The absolute stereochemistry of the product **3ap** was assigned in analogy with **8**.

**Compound 3aq:** Reaction was performed on a 0.2 mmol scale; purified by silica-gel flash column chromatography (1-3% methanol in CH<sub>2</sub>Cl<sub>2</sub>); Yellow liquid (44.0 mg, 0.114 mmol, 57% yield) [*Note:* compound **3aq** is unstable in silica]; **m.p.** 114-115 °C; **FT-IR**

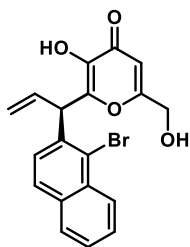

**(Thin film):** 3394 (br), 2924 (m), 2853 (m), 1650 (s), 1622 (s), 1577 (s), 1457 (m), 1202 (m) cm<sup>-1</sup>; **<sup>1</sup>H-NMR (400 MHz, CDCl<sub>3</sub>):**  $\delta$  8.32 (d,  $J = 8.7$  Hz, 1H), 7.80-7.76 (m, 2H), 7.60-7.56 (m, 1H), 7.52-7.49 (m, 2H), 6.52 (s, 1H), 6.24 (ddd,  $J = 16.7, 10.6, 6.6$  Hz, 1H), 5.86 (d,  $J = 5.9$  Hz, 1H), 5.34 (d,  $J = 10.1$  Hz, 1H), 5.13 (d,  $J = 17.0$  Hz, 1H), 4.45-4.35 (m, 2H); **<sup>13</sup>C-NMR (100 MHz, CDCl<sub>3</sub>):**  $\delta$  174.3, 167.7, 148.8, 142.3, 136.1,

134.6, 133.8, 132.6, 128.2, 128.0, 127.9, 127.8, 126.9, 126.8, 124.9, 118.4, 108.6, 61.1, 48.6; **HRMS (ESI+):**  $m/z$  calcd. for C<sub>19</sub>H<sub>16</sub>BrO<sub>4</sub> ([M+H]<sup>+</sup>): 387.0232, Found: 387.0230; **Optical rotation:**  $[\alpha]_D^{22} +9.5$  ( $c$  1.0, CHCl<sub>3</sub>) for an enantiomerically enriched sample with >99.9:0.1 er. The enantiomeric ratio was determined by HPLC analysis using Daicel Chiralpak IC column (90:10 *n*-Hexane/*i*-PrOH, flow rate = 1.0 mL/min, 20 °C, I = 280 nm,  $\tau_{\text{minor}} = 30.1$  min,  $\tau_{\text{major}} = 47.5$  min.). See Supporting Information: Part B for HPLC chromatograms. The absolute stereochemistry of the product **3aq** was assigned in analogy with **8**.

**Compound 3ar:** Reaction was performed on a 0.2 mmol scale; purified by silica-gel flash column chromatography (1-3% methanol in CH<sub>2</sub>Cl<sub>2</sub>); Yellow sticky liquid (46.0 mg, 0.152 mmol, 76% yield);

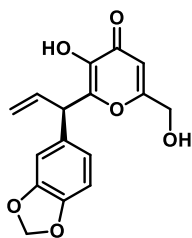

**FT-IR (Thin film):** 3332 (br), 2959 (m), 2924 (m), 2848 (m), 1656 (s), 1623 (s), 1580 (m), 1456 (m), 1251 (m) cm<sup>-1</sup>; **<sup>1</sup>H-NMR (400 MHz, CDCl<sub>3</sub>):**  $\delta$  6.79 (s, 1H), 6.73 (brs, 2H), 6.53 (s, 1H), 6.19 (ddd,  $J = 17.2, 9.9, 7.5$  Hz, 1H), 5.91 (s, 2H), 5.25 (d,  $J = 10.0$  Hz, 1H), 5.17 (d,  $J = 17.1$  Hz, 1H), 4.99 (d,  $J = 7.2$  Hz, 1H), 4.45 (s, 2H); **<sup>13</sup>C-NMR (100 MHz, CDCl<sub>3</sub>):**  $\delta$  174.5, 167.9, 150.7, 148.0, 146.8,

141.3, 135.3, 132.8, 121.4, 118.3, 108.6, 108.5, 101.2, 61.0, 47.4; **HRMS (ESI+):**  $m/z$  calcd. for C<sub>16</sub>H<sub>15</sub>O<sub>6</sub> ([M+H]<sup>+</sup>): 303.0869, Found: 303.0865; **Optical rotation:**  $[\alpha]_D^{22} -82.1$  ( $c$  2.0, CHCl<sub>3</sub>) for an enantiomerically enriched sample with 99.5:0.5 er. The enantiomeric ratio of compound was



determined by HPLC analysis using Daicel Chiralpak AD-H column (85:15 *n*-Hexane/*i*-PrOH, 1.0 mL/min, 20 °C, I = 282 nm,  $\tau_{\text{minor}} = 19.6$  min,  $\tau_{\text{major}} = 27.4$  min). See Supporting Information: Part B for HPLC chromatograms. The absolute stereochemistry of the product **3ar** was assigned in analogy with **8**.

**Compound 3as:** Reaction was performed on a 0.2 mmol scale; purified by silica-gel flash column chromatography (1-2% methanol in CH<sub>2</sub>Cl<sub>2</sub>); Yellow sticky liquid (35.0 mg, 0.132 mmol, 66% yield);

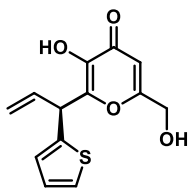

FT-IR (Thin film): 3288 (w), 2925 (w), 2853 (w), 1660 (s), 1628 (s), 1586 (s), 1417 (m), 1121 (m), 1018 (m) cm<sup>-1</sup>; <sup>1</sup>H-NMR (400 MHz, CDCl<sub>3</sub>):  $\delta$  7.22 (d, *J* = 5.0 Hz, 1H), 6.97-6.95 (m, 1H), 6.93-6.92 (m, 1H), 6.53 (s, 1H), 6.22 (ddd, *J* = 17.0, 10.3, 7.5 Hz, 1H), 5.33-5.31 (m, 2H), 5.27 (d, *J* = 7.5 Hz, 1H), 4.49 (s,

2H); <sup>13</sup>C-NMR (100 MHz, CDCl<sub>3</sub>):  $\delta$  174.3, 167.2, 148.9, 141.5, 141.1, 134.9, 127.1, 125.8, 125.1, 118.5, 108.7, 61.3, 43.3; HRMS (ESI<sup>+</sup>): *m/z* calcd. For C<sub>13</sub>H<sub>13</sub>O<sub>4</sub>S ([M+H]<sup>+</sup>): 265.0535, Found: 265.0534; Optical rotation:  $[\alpha]_{\text{D}}^{22} -52.9$  (*c* 1.0, CHCl<sub>3</sub>) for an enantiomerically enriched sample with 99:1 er. The enantiomeric ratio was determined by HPLC analysis using Daicel Chiralpak AD-H column (85:15 *n*-Hexane/*i*-PrOH, 1.0 mL/min, 20 °C, I = 276 nm,  $\tau_{\text{minor}} = 12.0$  min,  $\tau_{\text{major}} = 13.5$  min). See Supporting Information: Part B for HPLC chromatograms. The absolute stereochemistry of the product **3as** was assigned in analogy with **8**.

**Compound 3ba:** Reaction was performed on a 0.2 mmol scale; purified by silica-gel flash column chromatography (1% methanol in CH<sub>2</sub>Cl<sub>2</sub>); Yellow sticky liquid (46.0 mg, 0.190 mmol, 95% yield);

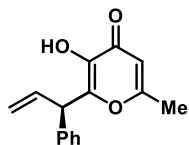

FT-IR (Thin film): 3458 (br), 2924 (m), 2853 (m), 1654 (s), 1621 (s), 1585 (s), 1452 (m), 1344 (w), 1207 (m) cm<sup>-1</sup>; <sup>1</sup>H-NMR (400 MHz, CDCl<sub>3</sub>):  $\delta$  7.33-7.32 (m, 4H), 7.29-7.25 (m, 1H), 6.28 (ddd, *J* = 17.3, 10.1, 7.6 Hz, 1H), 6.21 (s, 1H), 5.30 (d, *J* = 10.2 Hz, 1H), 5.23 (d, *J* = 17.1 Hz, 1H), 5.11 (d, *J* = 7.5 Hz, 1H), 2.25 (s, 3H); <sup>13</sup>C-

NMR (100 MHz, CDCl<sub>3</sub>):  $\delta$  174.3, 165.4, 150.3, 141.2, 139.4, 135.5, 128.7, 128.2, 127.2, 118.1, 110.7, 47.6, 20.1; HRMS (ESI<sup>+</sup>): *m/z* calcd. for C<sub>15</sub>H<sub>15</sub>O<sub>3</sub> ([M+H]<sup>+</sup>): 243.1021, Found: 243.1025; Optical rotation:  $[\alpha]_{\text{D}}^{22} -92.0$  (*c* 2.0, CHCl<sub>3</sub>) for an enantiomerically enriched sample with 99.9:0.1 er. The enantiomeric ratio was determined by HPLC analysis using Phenomenex Cellulose-1 column (90:10 *n*-Hexane/*i*-PrOH, flow rate = 1.0 mL/min, 20 °C, I = 276 nm,  $\tau_{\text{minor}} = 10.4$  min,  $\tau_{\text{major}} = 14.5$  min). See Supporting Information: Part B for HPLC chromatograms. The absolute stereochemistry of the product **3ba** was assigned in analogy with **8**.

**Compound 3ca:** Reaction was performed on a 0.2 mmol scale; purified by silica-gel flash column chromatography (1% methanol in CH<sub>2</sub>Cl<sub>2</sub>); Yellow sticky liquid (42.0 mg, 0.152 mmol, 76% yield);

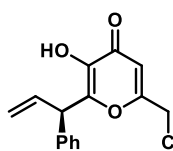

FT-IR (Thin film): 3404 (br), 2923 (m), 2852 (m), 1632 (s), 1588 (s), 1449 (m), 1361 (w), 1208 (m) cm<sup>-1</sup>; <sup>1</sup>H-NMR (400 MHz, CDCl<sub>3</sub>):  $\delta$  7.35-7.33 (m, 4H), 7.29-7.26 (m, 1H), 6.48 (s, 1H), 6.28 (ddd, *J* = 17.3, 10.1, 7.5 Hz, 1H), 5.32 (d, *J* = 10.2 Hz, 1H), 5.24 (d, *J* = 17.1 Hz, 1H), 5.13 (d, *J* = 7.3 Hz, 1H), 4.30 (s, 2H); <sup>13</sup>C-NMR (100 MHz,

CDCl<sub>3</sub>):  $\delta$  173.9, 161.8, 151.0, 141.8, 139.0, 135.1, 128.9, 128.3, 127.5, 118.5, 111.4, 47.8, 41.3; HRMS (ESI<sup>+</sup>): *m/z* calcd. for C<sub>15</sub>H<sub>14</sub>ClO<sub>3</sub> ([M+H]<sup>+</sup>): 277.0631, Found: 277.0630; Optical rotation:

$[\alpha]_D^{22}$   $-60.3$  ( $c$  2.0, CHCl<sub>3</sub>) for an enantiomerically enriched sample with >99.5:0.5 er. The enantiomeric ratio was determined by HPLC analysis using Daicel Chiralpak IC column (95:5 *n*-Hexane/*i*-PrOH, flow rate = 1.0 mL/min, 20 °C,  $I = 305$  nm,  $\tau_{\text{minor}} = 27.7$  min,  $\tau_{\text{major}} = 32.2$  min). See Supporting Information: Part B for HPLC chromatograms. The absolute stereochemistry of the product **3ca** was assigned in analogy with **8**.

**Compound 3da:** Reaction was performed on a 0.2 mmol scale; purified by silica-gel flash column chromatography (1% methanol in CH<sub>2</sub>Cl<sub>2</sub>); Yellow sticky liquid (55.0 mg, 0.194 mmol, 97% yield); **FT-IR (Thin film):** 3247 (br), 3060 (m), 2923 (m), 2852 (m), 2364 (m), 2105 (s), 1646 (s), 1628 (s), 1588 (s), 1448 (m), 1201 (m), 990 (m) cm<sup>-1</sup>; **<sup>1</sup>H-NMR (400 MHz, CDCl<sub>3</sub>):**  $\delta$  7.36-7.33 (m, 4H), 7.29-7.26 (m, 1H), 6.41 (s, 2H), 6.29 (ddd,  $J = 17.3, 9.9, 7.2$  Hz, 1H), 5.33 (d,  $J = 10.1$  Hz, 1H), 5.24 (d,  $J = 17.0$  Hz, 1H), 5.16 (d,  $J = 7.4$  Hz, 1H), 4.17-4.08 (m, 2H); **<sup>13</sup>C-NMR (100 MHz, CDCl<sub>3</sub>):**  $\delta$  173.9, 161.7, 151.1, 141.9, 138.9, 134.9, 128.9, 128.2, 127.4, 118.5, 111.0, 51.3, 47.7; **HRMS (ESI+):**  $m/z$  calcd. for C<sub>15</sub>H<sub>14</sub>N<sub>3</sub>O<sub>3</sub> ([M+H]<sup>+</sup>): 284.1035, Found: 284.1036; **Optical rotation:**  $[\alpha]_D^{22}$   $-80.6$  ( $c$  2.5, CHCl<sub>3</sub>) for an enantiomerically enriched sample with >99.9:0.1 er. The enantiomeric ratio was determined by HPLC analysis using Daicel Chiralpak IH column (85:15 *n*-Hexane/*i*-PrOH, flow rate = 1 mL/min, 20 °C,  $I = 282$  nm,  $\tau_{\text{major}} = 24.5$  min). See Supporting Information: Part B for HPLC chromatograms. The absolute stereochemistry of the product **3da** was assigned in analogy with **8**.

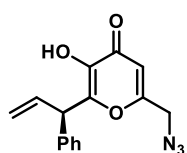

**Compound 3ea:** Reaction was performed on a 0.2 mmol scale; purified by silica-gel flash column chromatography (1% methanol in CH<sub>2</sub>Cl<sub>2</sub>); Yellow sticky liquid (55.0 mg, 0.156 mmol, 78% yield); **FT-IR (Thin film):** 3420 (br), 2923 (w), 1621 (s), 1582 (s), 1441 (m), 1207 (m), 987 (m) cm<sup>-1</sup>; **<sup>1</sup>H-NMR (400 MHz, CDCl<sub>3</sub>):**  $\delta$  7.29-7.23 (m, 10H), 6.20-6.10 (m, 2H), 5.24 (d,  $J = 10.0$  Hz, 1H), 5.17 (d,  $J = 17.0$  Hz, 1H), 5.04 (d,  $J = 6.9$  Hz, 1H), 3.79 (s, 2H); **<sup>13</sup>C-NMR (100 MHz, CDCl<sub>3</sub>):**  $\delta$  174.0, 164.1, 150.8, 141.5, 139.1, 135.2, 133.5, 131.6, 129.3, 128.7, 128.2, 127.9, 127.2, 118.2, 111.0, 47.6, 37.2; **HRMS (ESI+):**  $m/z$  calcd. for C<sub>21</sub>H<sub>19</sub>O<sub>3</sub>S ([M+H]<sup>+</sup>): 351.1055, Found: 351.1054; **Optical rotation:**  $[\alpha]_D^{22}$   $+66.0$  ( $c$  2.0, CHCl<sub>3</sub>) for an enantiomerically enriched sample with >99.9:0.1 er. The enantiomeric ratio was determined by HPLC analysis using Daicel Chiralpak IH column (90:10 *n*-Hexane/*i*-PrOH, flow rate = 0.5 mL/min, 20 °C,  $I = 272$  nm,  $\tau_{\text{major}} = 48.4$  min). See Supporting Information: Part B for HPLC chromatograms. The absolute stereochemistry of the product **3ea** was assigned in analogy with **8**.

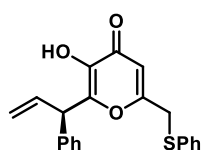

**Compound 3fa:** Reaction was performed on a 0.2 mmol scale; purified by silica-gel flash column chromatography (5-6% EtOAc in petroleum ether); Yellow sticky liquid (40.0 mg, 0.142 mmol, 71% yield); **m.p.** 96-97 °C; **FT-IR (Thin film):** 3276 (br), 2920 (m), 2850 (m), 1605 (s), 1420 (m), 1119 (m), 1033 (m) cm<sup>-1</sup>; **<sup>1</sup>H-NMR (400 MHz, CDCl<sub>3</sub>):**  $\delta$  8.22 (d,  $J = 8.0$  Hz, 1H), 7.65-7.61 (m, 1H), 7.46 (d,  $J = 8.5$  Hz, 1H), 7.42-7.40 (m, 2H), 7.37-7.32 (m, 3H), 7.29-7.25 (m, 1H), 6.55 (br, 1H), 6.41 (ddd,  $J = 17.3, 9.6, 7.1$  Hz, 1H), 5.35 (d,  $J = 10.2$  Hz, 1H), 5.30 (d,  $J = 17.3$  Hz, 1H), 5.28-5.19 (m, 1H); **<sup>13</sup>C-NMR (100 MHz, CDCl<sub>3</sub>):**  $\delta$  173.1, 155.8, 151.0, 139.3, 138.0, 135.4, 133.3, 128.8, 128.3, 127.4, 125.6, 124.6, 121.4,

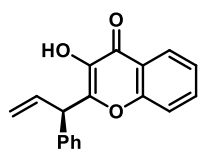

118.5, 118.4, 48.4; **HRMS (ESI+)**:  $m/z$  calcd. for C<sub>18</sub>H<sub>15</sub>O<sub>3</sub> ([M+H]<sup>+</sup>): 279.1021, Found: 279.1024; **Optical rotation**:  $[\alpha]_D^{22}$  -24.7 (*c* 1.5, CHCl<sub>3</sub>) for an enantiomerically enriched sample with >99.5:0.5 er. The enantiomeric ratio was determined by HPLC analysis using Daicel Chiralpak IG column (95:5 *n*-Hexane/*i*-PrOH, flow rate = 1 mL/min, 20 °C, I = 233 nm,  $\tau_{\text{minor}}$  = 26.0 min,  $\tau_{\text{major}}$  = 33.0 min). See Supporting Information: Part B for HPLC chromatograms. The absolute stereochemistry of the product **3fa** was assigned in analogy with **8**.

**Compound 3ga**: Reaction was performed on a 0.2 mmol scale; purified by silica-gel flash column chromatography (1-2% methanol in CH<sub>2</sub>Cl<sub>2</sub>); bright yellow sticky liquid (60.0 mg, 0.2 mmol, >99% yield); **FT-IR (Thin film)**: 3362 (br), 2922 (w), 2851 (w), 1661 (s), 1593 (m), 1456 (w), 1255 (s), 1076 (w) cm<sup>-1</sup>; **<sup>1</sup>H-NMR (400 MHz, CDCl<sub>3</sub>)**:  $\delta$  8.12 (d, *J* = 7.2 Hz, 1H), 8.07 (d, *J* = 7.7 Hz, 1H), 7.77-7.73 (m, 1H), 7.69-7.65 (m, 1H), 7.55 (br s, 1H), 7.41-7.39 (m, 2H), 7.31-7.28 (m, 2H), 7.22-7.18 (m, 1H), 6.67-6.59 (m, 1H), 5.29-5.23 (m, 3H); **<sup>13</sup>C-NMR (100 MHz, CDCl<sub>3</sub>)**:  $\delta$  183.9, 181.9, 152.9, 141.6, 137.1, 135.3, 133.1, 132.9, 129.3, 128.4, 128.0, 127.2, 126.6, 126.2, 124.9, 117.3, 45.0; **HRMS (ESI+)**:  $m/z$  calcd. for C<sub>19</sub>H<sub>14</sub>O<sub>3</sub>Na([M+Na]<sup>+</sup>): 313.0841, Found: 313.0841; **Optical rotation**:  $[\alpha]_D^{22}$  -93.4 (*c* 1.0, CHCl<sub>3</sub>) for an enantiomerically enriched sample with >99.9:0.1 er. The enantiomeric ratio was determined by HPLC analysis using Daicel Chiralpak IG column (90:10 *n*-Hexane/*i*-PrOH, flow rate = 1.0 mL/min, 20 °C, I = 232 nm,  $\tau_{\text{major}}$  = 14.9 min. See Supporting Information: Part B for HPLC chromatograms. The absolute stereochemistry of the product **3ga** was assigned in analogy with **8**.

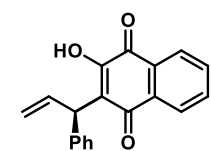

**Compound 3ha**: Reaction was performed on a 0.2 mmol scale; purified by silica-gel flash column chromatography (5% EtOAc in petroleum ether); Yellow sticky liquid (55.0 mg, 0.174 mmol, 87% yield); **FT-IR (Thin film)**: 3271 (br), 2924 (m), 2852 (m), 1728 (s), 1631 (s), 1593 (s), 1451 (m), 1265 (s), 1110 (m) cm<sup>-1</sup>; **<sup>1</sup>H-NMR (400 MHz, CDCl<sub>3</sub>)**:  $\delta$  8.03 (d, *J* = 7.4 Hz, 2H), 7.64-7.60 (m, 1H), 7.49-7.45 (m, 2H), 7.33-7.28 (m, 3H), 7.26-7.22 (m, 2H), 6.53 (s, 1H), 6.25 (ddd, *J* = 17.2, 9.9, 7.2 Hz, 1H), 5.28 (d, *J* = 10.1 Hz, 1H), 5.22 (d, *J* = 17.1 Hz, 1H), 5.19-5.11 (m, 3H); **<sup>13</sup>C-NMR (100 MHz, CDCl<sub>3</sub>)**:  $\delta$  173.9, 165.6, 161.8, 150.8, 141.8, 138.9, 135.1, 133.8, 129.9, 128.9, 128.8, 128.7, 128.2, 127.4, 118.4, 110.6, 61.8, 47.6; **HRMS (ESI+)**:  $m/z$  calcd. for C<sub>22</sub>H<sub>19</sub>O<sub>5</sub> ([M+H]<sup>+</sup>): 363.1232, Found: 363.1230; **Optical rotation**:  $[\alpha]_D^{22}$  -42.1 (*c* 2.0, CHCl<sub>3</sub>) for an enantiomerically enriched sample with >99.9:0.1 er. The enantiomeric ratio was determined by HPLC analysis using Daicel Chiralpak IH column (85:15 *n*-Hexane/*i*-PrOH, flow rate = 1 mL/min, 20 °C, I = 298 nm,  $\tau_{\text{major}}$  = 27.5 min). See Supporting Information: Part B for HPLC chromatograms. The absolute stereochemistry of the product **3ha** was assigned in analogy with **8**.

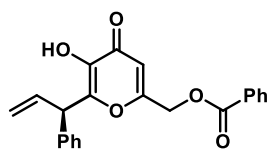

**Compound 3ia:** Reaction was performed on a 0.2 mmol scale; purified by silica-gel flash column chromatography (30% EtOAc in petroleum ether); Yellow sticky liquid (75.0 mg, 0.126 mmol, 63% yield);

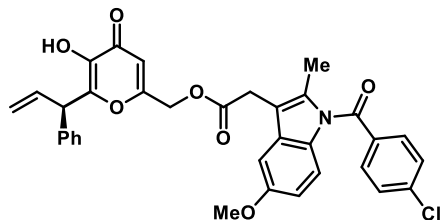

FT-IR (Thin film): 3266 (br), 3079 (w), 2928 (m), 1746 (s), 1680 (s), 1636 (s), 1459 (s), 1453 (m), 1318 (m), 1222 (m), 1148 (m), 1078 (m) cm<sup>-1</sup>; <sup>1</sup>H-NMR (400 MHz, CDCl<sub>3</sub>):  $\delta$  7.66 (d,  $J$  = 8.5 Hz, 2H), 7.47 (d,  $J$  = 8.4 Hz, 2H), 7.34-7.25 (m, 5H), 6.92 (d,  $J$  = 2.4 Hz, 1H), 6.86 (d,  $J$  = 9.0 Hz, 1H), 6.68 (dd,  $J$  = 9.0, 2.5 Hz, 1H), 6.35 (s, 1H), 6.20 (ddd,  $J$  = 17.3, 9.9, 7.2 Hz, 1H), 5.27 (d,  $J$  = 10.1 Hz, 1H), 5.20 (d,  $J$  = 17.2 Hz, 1H), 5.09 (d,  $J$  = 7.5 Hz, 1H), 4.92 (s, 2H), 3.81 (s, 3H), 3.72 (s, 2H), 2.37 (s, 3H); <sup>13</sup>C-NMR (100 MHz, CDCl<sub>3</sub>):  $\delta$  173.8, 169.8, 168.4, 161.6, 156.2, 150.8, 141.8, 139.5, 138.9, 136.3, 135.0, 133.8, 131.3, 130.9, 130.4, 129.3, 128.8, 128.2, 127.5, 118.4, 115.2, 111.8, 111.6, 110.6, 101.3, 61.8, 55.8, 47.7, 30.1, 13.4; HRMS (ESI<sup>+</sup>):  $m/z$  calcd. for C<sub>34</sub>H<sub>29</sub>ClNO<sub>7</sub> ([M+H]<sup>+</sup>): 598.1633, Found: 598.1635; Optical rotation:  $[\alpha]_D^{22}$  -31.4 ( $c$  2.0, CHCl<sub>3</sub>) for an enantiomerically enriched sample with >99.9:0.1 er. The enantiomeric ratio was determined by HPLC analysis using Daicel Chiralpak IG column (40:60 *n*-Hexane/EtOH, flow rate = 1.0 mL/min, 20 °C,  $\lambda$  = 268 nm,  $\tau_{\text{minor}}$  = 37.6 min  $\tau_{\text{major}}$  = 49.9 min). See Supporting Information: Part B for HPLC chromatograms. The absolute stereochemistry of the product **3ia** was assigned in analogy with **8**.

**Compound 3ja:** Reaction was performed on a 0.2 mmol scale; **3ja** was formed with >20:1 dr as

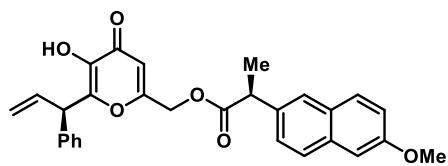

determined by <sup>1</sup>H-NMR of the crude product; purified by silica-gel flash column chromatography (25-30% EtOAc in petroleum ether); Yellow sticky liquid (86.0 mg, 0.182 mmol, 91% yield); FT-IR (Thin film): 3432 (br), 2978 (w), 2931 (w), 2851 (w), 1742 (m), 1632 (s), 1604 (s), 1452 (m), 1220 (m) cm<sup>-1</sup>; <sup>1</sup>H-NMR

(400 MHz, CDCl<sub>3</sub>):  $\delta$  7.73-7.70 (m, 2H), 7.67 (s, 1H), 7.40-7.38 (m, 1H), 7.31-7.26 (m, 6H), 7.18-7.13 (m, 2H), 6.37 (s, 1H), 6.14 (ddd,  $J$  = 17.3, 9.8, 7.3 Hz, 1H), 5.22-5.16 (m, 2H), 5.10 (d,  $J$  = 7.5 Hz, 1H), 4.93-4.83 (m, 2H), 3.93-3.88 (m, 1H), 3.91 (s, 3H), 1.61 (d,  $J$  = 7.2 Hz, 3H); <sup>13</sup>C-NMR (100 MHz, CDCl<sub>3</sub>):  $\delta$  173.9, 173.6, 161.6, 157.9, 150.9, 141.8, 138.9, 135.0, 134.7, 133.9, 129.3, 129.0, 128.7, 128.1, 127.5, 127.3, 126.1, 126.0, 119.3, 118.3, 110.7, 105.7, 61.7, 55.4, 47.6, 45.3, 18.4; HRMS (ESI<sup>+</sup>):  $m/z$  calcd. for C<sub>29</sub>H<sub>27</sub>O<sub>6</sub> ([M+H]<sup>+</sup>): 471.0808, Found: 471.0844; Optical rotation:  $[\alpha]_D^{22}$  -35.5 ( $c$  2.0, CHCl<sub>3</sub>). The absolute stereochemistry of the product **3ja** was assigned in analogy with **8**.

**Compound 3ka:** Reaction was performed on a 0.2 mmol scale; **3ka** was formed with >20:1 dr as

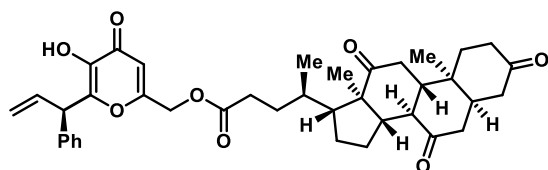

determined by <sup>1</sup>H-NMR of the crude product; purified by silica-gel flash column chromatography (1% methanol in CH<sub>2</sub>Cl<sub>2</sub>); Pale yellow sticky liquid (82.0 mg, 0.128 mmol, 64% yield); FT-IR (Thin film): 3397 (br), 2962 (m), 2926 (m), 2876 (m), 1743 (m), 1710 (s),

1633 (s), 1591 (m), 1451 (m), 1205 (m) cm<sup>-1</sup>; <sup>1</sup>H-NMR (400 MHz, CDCl<sub>3</sub>):  $\delta$  7.34-7.26 (m, 4H),

7.24-7.22 (m, 1H), 6.41 (s, 1H), 6.23 (ddd,  $J = 17.3, 9.8, 7.2$  Hz, 1H), 5.29 (d,  $J = 10.2$  Hz, 1H), 5.21 (d,  $J = 17.2$  Hz, 1H), 5.10 (d,  $J = 7.6$  Hz, 1H), 4.88 (s, 2H), 2.93-2.77 (m, 4H), 2.53-2.15 (m, 11H), 2.15-2.00 (m, 6H), 1.94-1.84 (m, 4H), 1.64-1.56 (m, 1H), 1.38 (s, 3H), 1.05 (s, 3H), 0.84 (d,  $J = 6.5$  Hz, 3H); **<sup>13</sup>C-NMR (100 MHz, CDCl<sub>3</sub>):**  $\delta$  212.1, 209.3, 208.8, 173.9, 173.0, 162.0, 150.8, 141.8, 138.9, 135.1, 128.8, 128.2, 127.4, 118.4, 110.6, 61.2, 57.0, 51.8, 49.0, 47.7, 46.9, 45.6, 45.0, 42.9, 38.7, 36.6, 36.1, 35.6, 35.3, 31.1, 30.3, 27.7, 25.2, 22.0, 18.7, 11.9; **HRMS (ESI+):**  $m/z$  calcd. for C<sub>39</sub>H<sub>47</sub>O<sub>8</sub> ([M+H]<sup>+</sup>): 643.3271, Found: 643.3270; **Optical rotation:**  $[\alpha]_D^{22} -13.7$  ( $c$  2.0, CHCl<sub>3</sub>). The absolute stereochemistry of the product **3ka** was assigned in analogy with **8**.

**Compound 3la:** Reaction was performed on a 0.2 mmol scale; **3la** was formed with >20:1 dr as determined by <sup>1</sup>H-NMR of the crude product; purified by silica-gel flash column chromatography (1% methanol in CH<sub>2</sub>Cl<sub>2</sub>); Yellow liquid (52.0 mg, 0.124 mmol, 62% yield); **FT-IR (Thin film):** 3272 (br), 2955 (w), 2924 (w), 2854 (w), 1744 (s), 1702 (s), 1633 (s), 1592 (s), 1451 (m), 1202 (m), 1157 (m) cm<sup>-1</sup>; **<sup>1</sup>H-NMR (400 MHz, CDCl<sub>3</sub>):**  $\delta$  7.34-7.25 (m, 5H), 6.41 (s, 1H), 6.24 (ddd,  $J = 17.3, 10.1, 7.5$  Hz, 1H), 5.30 (d,  $J = 10.1$  Hz, 1H), 5.21 (d,  $J = 17.2$  Hz, 1H), 5.10 (d,  $J = 7.4$  Hz, 1H), 4.86 (s, 2H), 2.88-2.83 (m, 1H), 2.40-2.27 (m, 3H), 2.03 (s, 3H), 1.99-1.86 (m, 2H), 1.25 (s, 3H), 0.84 (s, 3H); **<sup>13</sup>C-NMR (100 MHz, CDCl<sub>3</sub>):**  $\delta$  207.3, 173.8, 171.7, 161.7, 150.6, 141.8, 139.0, 135.1, 128.8, 128.2, 127.4, 118.4, 110.7, 61.4, 54.2, 47.7, 43.2, 37.9, 34.7, 30.3, 29.8, 23.1, 17.5; **HRMS (ESI+):**  $m/z$  calcd. for C<sub>25</sub>H<sub>29</sub>O<sub>6</sub> ([M+H]<sup>+</sup>): 425.1964, Found: 425.1963; **Optical rotation:**  $[\alpha]_D^{22} -68.3$  ( $c$  2.0, CHCl<sub>3</sub>). The absolute stereochemistry of the product **3la** was assigned in analogy with **8**.

## I. Unsuccessful substrates for the asymmetric allylic alkylation reaction:

Unreactive electrophiles:

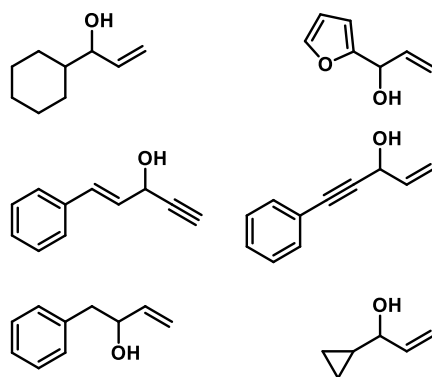

Unreactive nucleophiles:

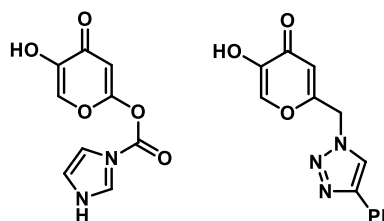

**J. Large scale synthesis of 3aa and 3ba:**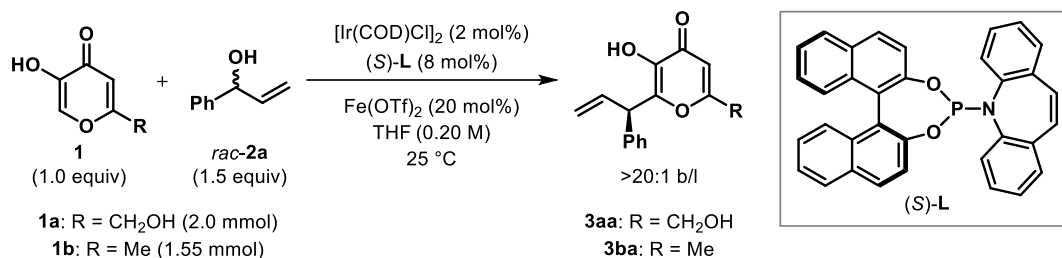

In an oven and vacuum-dried 50 mL round-bottom flask equipped with a magnetic stir bar,  $[\text{Ir}(\text{COD})\text{Cl}]_2$  (27.0 mg, 0.04 mmol, 2 mol%) and (*S*)-**L** (81.0 mg, 0.16 mmol, 8 mol%) were taken with 2 mL of dry THF under a positive argon pressure. The solution was stirred vigorously at 25 °C for 15 min to obtain a deep red solution. A solution of allylic alcohol *rac*-**2a** (402.0 mg, 3.0 mmol, 1.5 equiv.) in 7 mL of dry THF was then added to this red solution and stirred at 25 °C for 5 min. Kojic acid derivative **1** (2.0 mmol, 1.0 equiv.) was then added followed by  $\text{Fe}(\text{OTf})_2$  (142 mg, 0.4 mmol, 0.2 equiv.). The reaction flask was purged with argon, closed with a glass stopper, and stirred at 25 °C until TLC revealed complete consumption of **1**. The reaction mixture was then allowed to attain ambient temperature, diluted with 10 mL of  $\text{CH}_2\text{Cl}_2$  and 10 mL of 1(N) HCl. The organic layer was separated, and the aqueous layer was extracted with  $\text{CH}_2\text{Cl}_2$  (10 mL  $\times$  3). The combined organic layer was washed with brine (25 mL), dried over anhydrous  $\text{Na}_2\text{SO}_4$  and concentrated under reduced pressure to obtain a yellow liquid. This residue was purified by silica-gel flash column chromatography (1-3% methanol in  $\text{CH}_2\text{Cl}_2$ ) to obtain  $\beta$ -allylic kojic acid derivatives **3aa** and **3ba** as a yellow liquid in 98% and 93% yield respectively with >99.5:0.5 er in both cases.

**K. Procedure for the Staudinger reduction of 3da:**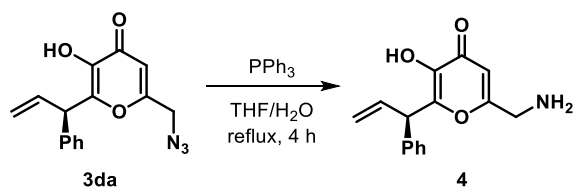

In an oven-dried 10 mL round-bottom flask, **3da** (50.0 mg, 0.175 mmol, 1.0 equiv.) and  $\text{PPh}_3$  (70 mg, 0.2645 mmol, 1.5 equiv.) were taken in 3.5 mL THF followed by addition of 25  $\mu\text{L}$  distilled water and allowed to reflux at 75 °C for 4 h. Then solvent was evaporated from the reaction mixture to obtain a dark yellow residue, which was purified by silica-gel flash column chromatography (3-5% methanol in  $\text{CH}_2\text{Cl}_2$ ) to afford **4** as a yellow liquid (36.0 mg, 0.140 mmol, 80% yield) [*Note*: compound **4** is unstable in silica]; **FT-IR (Thin film)**: 3436 (w), 2923 (m), 2852 (w), 1590 (s), 1417 (m), 1122 (s)  $\text{cm}^{-1}$ ; **<sup>1</sup>H-NMR (400 MHz,  $\text{CDCl}_3$ )**:  $\delta$  7.35-7.26 (m, 5H), 6.40 (s, 1H), 6.26 (ddd,  $J = 17.2, 9.6, 7.2$  Hz, 1H), 5.30 (d,  $J = 10.0$  Hz, 1H), 5.21 (d,  $J = 16.9$  Hz, 1H), 5.10 (d,  $J = 7.2$  Hz, 1H), 3.69 (s, 2H), 1.42 (br, 1H); **<sup>13</sup>C-NMR (100 MHz,  $\text{CDCl}_3$ )**:  $\delta$  174.3, 168.8, 149.9, 141.4, 139.2, 135.3, 128.8, 128.2, 127.4, 118.3, 108.4, 47.8, 43.9; **HRMS (ESI+)**:  $m/z$  calcd. for  $\text{C}_{15}\text{H}_{16}\text{NO}_3$  ( $[\text{M}+\text{H}]^+$ ): 258.1130, Found:

258.1129; **Optical rotation:**  $[\alpha]_D^{22} +67.3$  (*c* 1.0, CHCl<sub>3</sub>) for an enantiomerically enriched sample with >99.9:0.1 er. The enantiomeric ratio was determined by HPLC analysis using Phenomenex Cellulose-2 column (70:30 *n*-Hexane/*i*-PrOH, flow rate = 1.0 mL/min, 20 °C, I = 280 nm,  $\tau_{\text{major}} = 40.5$  min). See Supporting Information: Part B for HPLC chromatograms.

#### L. Procedure for the selective hydrogenation of the allylic olefin of **3aa**:

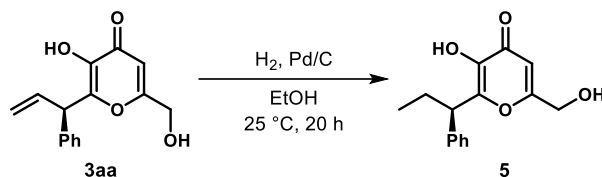

In an oven and vacuum-dried 10 mL two-necked round-bottom flask, a solution of **3aa** (21.0 mg, 0.081 mmol, 1.0 equiv.) in EtOH (2.0 mL) along with 10% Pd/C (4.0 mg, 0.004 mmol, 0.05 equiv.) were taken. The resulting mixture was degassed and stirred under H<sub>2</sub> balloon pressure for 20 h at 25 °C. The reaction mixture was filtered over Celite® and washed with ethyl acetate. The filtrate was concentrated under reduced pressure and the residue was purified by silica-gel flash column chromatography (0.5-1% methanol in CH<sub>2</sub>Cl<sub>2</sub>) to obtain **5** as a colorless sticky liquid (17.0 mg, 0.065 mmol, 81% yield); **FT-IR (Thin film):** 3413 (br), 2925 (m), 2866 (w), 1628 (s), 1574 (s), 1456 (m), 1210 (m) cm<sup>-1</sup>; **<sup>1</sup>H-NMR (400 MHz, CDCl<sub>3</sub>):**  $\delta$  7.35-7.21 (m, 5H), 6.49 (s, 1H), 4.51-4.43 (m, 2H), 4.22 (t, *J* = 7.9 Hz, 1H), 2.18-1.98 (m, 2H), 0.92 (t, *J* = 7.3 Hz, 3H); **<sup>13</sup>C-NMR (100 MHz, CDCl<sub>3</sub>):**  $\delta$  174.3, 167.3, 151.9, 141.6, 140.4, 128.8, 128.1, 127.3, 108.5, 61.2, 45.9, 25.5, 12.4; **HRMS (ESI+):** *m/z* calcd. for C<sub>15</sub>H<sub>17</sub>O<sub>4</sub> ([M+H]<sup>+</sup>): 261.1127, Found: 261.1126; **Optical rotation:**  $[\alpha]_D^{22} -123.3$  (*c* 1.0, CHCl<sub>3</sub>) for an enantiomerically enriched sample with >99.5:0.5 er. The enantiomeric ratio was determined by HPLC analysis using Daicel Chiralpak AD-H column (90:10 *n*-Hexane/*i*-PrOH, flow rate = 1.0 mL/min, 20 °C, I = 277 nm,  $\tau_{\text{minor}} = 13.9$  min,  $\tau_{\text{major}} = 15.9$  min). See Supporting Information: Part B for HPLC chromatograms.

#### M. Procedure for the double silylation and hydroboration of **3aa**:

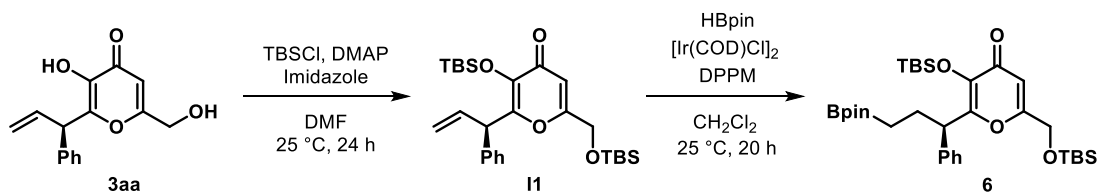

In an oven-dried 25 mL round-bottom flask, **3aa** (235.0 mg, 0.91 mmol, 1.0 equiv.) was taken along with DMAP (22.2 mg, 0.182 mmol, 0.2 equiv.) and imidazole (186.0 mg, 2.729 mmol, 3.0 equiv.) under a positive argon pressure. Then 1 mL of dry DMF was added, followed by addition of TBSCl (343 mg, 2.274 mmol, 2.5 equiv.) in 2 mL DMF and the resulting solution was stirred at 25 °C for 24 h under argon. Upon completion, the resulting mixture was diluted with 30 mL of distilled water

and 30 mL of diethyl ether. The organic layer was separated and washed with distilled water (20 mL  $\times$  3). The combined organic layer was washed with brine (25 mL), dried over anh. Na<sub>2</sub>SO<sub>4</sub> and concentrated under reduced pressure to obtain a yellow liquid. This residue was purified by silica-gel flash column chromatography (2-3% EtOAc in petroleum ether) to obtain **11** as a yellow liquid (358 mg, 0.736 mmol, 81% yield). **FT-IR (Thin film):** 3315 (br), 2935 (w), 2860 (w), 1725 (m), 1628 (s), 1581 (m), 1454 (m), 1250 (m) cm<sup>-1</sup>; **<sup>1</sup>H-NMR (400 MHz, CDCl<sub>3</sub>):**  $\delta$  7.34-7.30 (m, 2H), 7.27-7.23 (m, 3H), 6.38 (s, 1H), 6.19 (ddd,  $J = 7.4, 10.1, 17.3$  Hz, 1H), 5.29 (d,  $J = 10.1$  Hz, 1H), 5.24 (d,  $J = 7.4$  Hz, 1H), 5.17 (d,  $J = 17.2$  Hz, 1H), 4.43-4.33 (m, 2H), 0.96 (s, 9H), 0.90 (s, 9H), 0.31 (s, 3H), 0.27 (s, 3H), 0.07 (s, 3H), 0.06 (s, 3H); **<sup>13</sup>C-NMR (100 MHz, CDCl<sub>3</sub>):**  $\delta$  175.3, 165.6, 155.3, 141.5, 139.4, 135.8, 128.7, 128.2, 127.2, 118.1, 110.9, 61.3, 46.9, 26.2, 25.8, 19.0, 18.3, -3.3, -3.4, -3.6, -5.4.

In an oven dried 25 mL round-bottom flask, **11** (60.0 mg, 0.123 mmol, 1.0 equiv.) was taken along with [Ir(COD)Cl]<sub>2</sub> (2.4 mg, 0.0036 mmol, 0.03 equiv.) and bis(diphenylphosphino)methane (DPPM) (2.8 mg, 0.0072 mmol, 0.06 equiv.) under a positive argon pressure. Then 4 mL of dry CH<sub>2</sub>Cl<sub>2</sub> was added, followed by addition of HBpin (36  $\mu$ L, 0.246 mmol, 2.0 equiv.) and the resulting solution was stirred at 25 °C for 20 h under argon. Upon completion, the reaction mixture was quenched with 0.5 mL methanol and diluted with 4 mL of distilled water. The organic phase was separated, and the aqueous phase was extracted with CH<sub>2</sub>Cl<sub>2</sub> (3  $\times$  5 mL). The combined organic layer was dried over anh. Na<sub>2</sub>SO<sub>4</sub> and concentrated under reduced pressure to obtain a yellow oil, which was purified by silica-gel flash column chromatography (3-5% EtOAc in petroleum ether) to obtain **6** as a yellow oil (72.0 mg, 0.117 mmol, 95% yield); **FT-IR (Thin film):** 3279 (w), 2935 (m), 2861 (w), 1633 (s), 1586 (m), 1373 (m), 1215 (s) cm<sup>-1</sup>; **<sup>1</sup>H-NMR (400 MHz, CDCl<sub>3</sub>):**  $\delta$  7.32-7.28 (m, 4H), 7.23-7.19 (m, 1H), 6.33 (s, 1H), 4.49-4.38 (m, 3H), 2.16-2.01 (m, 2H), 1.22 (s, 12H), 0.99 (s, 9H), 0.92 (s, 9H), 0.78-0.71 (m, 2H), 0.27 (s, 3H), 0.26 (s, 3H), 0.10 (s, 3H), 0.09 (s, 3H); **<sup>13</sup>C-NMR (100 MHz, CDCl<sub>3</sub>):**  $\delta$  175.1, 165.3, 156.6, 141.7, 140.9, 128.6, 128.2, 127.0, 110.7, 83.2, 61.4, 45.6, 27.5, 26.4, 25.8, 24.9, 24.9, 19.1, 18.3, -3.1, -3.4, -5.3; **Optical rotation:**  $[\alpha]_D^{22}$  -61.2 ( $c$  2.0, CHCl<sub>3</sub>) for an enantiomerically enriched sample.

#### N. Procedure for the oxidation of **6**:

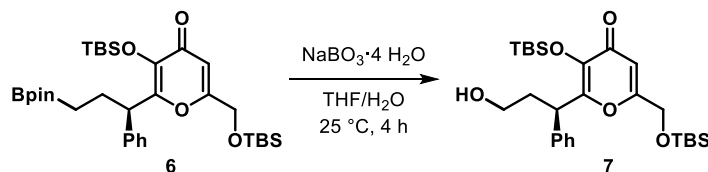

In an oven dried 10 mL round-bottom flask, **6** (38.0 mg, 0.062 mmol, 1.0 equiv.) was taken in a mixture of THF/H<sub>2</sub>O (1:1) followed by addition of NaBO<sub>3</sub>·4H<sub>2</sub>O (38.0 mg, 0.247 mmol, 4.0 equiv.) and allowed to stir at 25 °C for 4 h. Upon completion, the reaction mixture was diluted with 10 mL of distilled water and 10 mL of CH<sub>2</sub>Cl<sub>2</sub>. The organic phase was separated, and the aqueous phase was extracted with CH<sub>2</sub>Cl<sub>2</sub> (3  $\times$  5 mL). The combined organic layer was dried over anh. Na<sub>2</sub>SO<sub>4</sub> and



concentrated under reduced pressure to obtain a pale yellow residue, which was purified by silica-gel flash column chromatography (1-2% methanol in CH<sub>2</sub>Cl<sub>2</sub>) to afford **7** as a yellow oil (27.0 mg, 0.053 mmol, 87% yield); **FT-IR (Thin film)**: 3315 (br), 2935 (w), 2860 (w), 1725 (m), 1629 (s), 1582 (m), 1455 (m), 1251 (m) cm<sup>-1</sup>; **<sup>1</sup>H-NMR (400 MHz, CDCl<sub>3</sub>)**:  $\delta$  7.34-7.29 (m, 4H), 7.26-7.23 (m, 1H), 6.34 (s, 1H), 4.71 (t, *J* = 7.9 Hz, 1H), 4.46-4.37 (m, 2H), 3.63-3.60 (m, 2H), 2.28-2.23 (m, 2H), 1.00 (s, 9H), 0.91 (s, 9H), 0.30 (s, 3H), 0.27 (s, 3H), 0.09 (s, 3H), 0.09 (s, 3H); **<sup>13</sup>C-NMR (100 MHz, CDCl<sub>3</sub>)**:  $\delta$  175.1, 165.4, 156.1, 141.5, 140.1, 128.8, 128.1, 127.3, 110.9, 61.4, 60.7, 39.4, 35.5, 26.3, 25.8, 19.1, 18.3, -3.2, -3.3, -5.3; **HRMS (ESI+)**: *m/z* calcd. for C<sub>27</sub>H<sub>45</sub>O<sub>5</sub>Si<sub>2</sub> ([M+H]<sup>+</sup>): 505.2806, Found: 505.2802; **Optical rotation**: [ $\alpha$ ]<sub>D</sub><sup>22</sup> -92.1 (*c* 2.0, CHCl<sub>3</sub>) for an enantiomerically enriched sample with >99.5:0.5 er. The enantiomeric ratio was determined by HPLC analysis using Phenomenex Cellulose-2 column (90:10 *n*-Hexane/*i*-PrOH, flow rate = 1.0 mL/min, 20 °C, I = 254 nm,  $\tau_{\text{minor}}$  = 4.3 min,  $\tau_{\text{major}}$  = 6.7 min). See Supporting Information: Part B for HPLC chromatograms.

### O. Procedure for the ozonolysis induced cyclization of **7**:

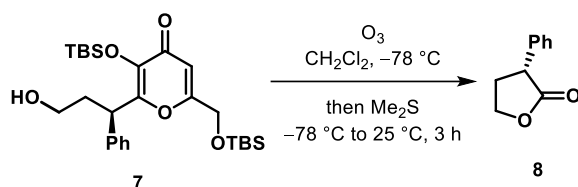

In an oven-dried 10 mL round-bottom flask, **7** (100.0 mg, 0.198 mmol, 1.0 equiv.) was taken in 3.5 mL CH<sub>2</sub>Cl<sub>2</sub> and treated with oxygen-ozone stream for 15 min at -78 °C. After full consumption of **7**, the resulting mixture was treated with an excess of dimethyl sulfide (58  $\mu$ l, 0.792 mmol, 4.0 equiv.), allowed to slowly warm to ambient temperature and stirred for 3 h. Then all the volatiles were removed under reduced pressure to obtain yellow residue, which was purified by silica-gel flash column chromatography (11-13% EtOAc in petroleum ether) to afford **8** as a yellow liquid (10.0 mg, 0.062 mmol, 31% yield); **FT-IR (Thin film)**: 2958 (w), 2919 (m), 2851 (w), 1768 (s), 1597 (m), 1373 (m), 1150 (s), 1023 (s) cm<sup>-1</sup>; **<sup>1</sup>H-NMR (400 MHz, CDCl<sub>3</sub>)**:  $\delta$  7.39-7.36 (m, 2H), 7.32-7.28 (m, 3H), 4.48 (dt, *J* = 3.3, 8.6 Hz, 1H) 4.39-4.32 (m, 1H), 3.82 (t, *J* = 9.5 Hz, 1H), 2.76-2.68 (m, 1H), 2.50-2.40 (m, 1H); **<sup>13</sup>C-NMR (100 MHz, CDCl<sub>3</sub>)**:  $\delta$  177.5 136.8, 129.1, 128.0, 127.8, 66.6, 45.6, 31.7; **HRMS (ESI+)**: *m/z* calcd. for C<sub>10</sub>H<sub>11</sub>O<sub>2</sub> ([M+H]<sup>+</sup>): 163.0759, Found: 163.0760; **Optical rotation**: [ $\alpha$ ]<sub>D</sub><sup>22</sup> -4.7 (*c* 1.0, CHCl<sub>3</sub>) for an enantiomerically enriched sample with 98:2 er [Lit<sup>7</sup> [ $\alpha$ ]<sub>D</sub><sup>22</sup> +3.1 (*c* 1.0, CHCl<sub>3</sub>) for an enantiomerically enriched sample with 95:5 er]. The enantiomeric ratio was determined by HPLC analysis using Daicel Chiralpak IC column (80:20 *n*-Hexane/*i*-PrOH, flow rate = 1.0 mL/min, 20 °C, I = 210 nm,  $\tau_{\text{major}}$  = 23.7 min,  $\tau_{\text{minor}}$  = 26.6 min). See Supporting Information: Part B for HPLC chromatograms. The absolute stereochemistry of the product **8** was assigned by comparing its specific rotation with that reported in the literature.<sup>7</sup>

<sup>7</sup> N. A. Paras and D. W. C. MacMillan, *J. Am. Chem. Soc.*, 2001, **123**, 4370-4371.

**P. Procedure for the selective O-allylation of 3aa:**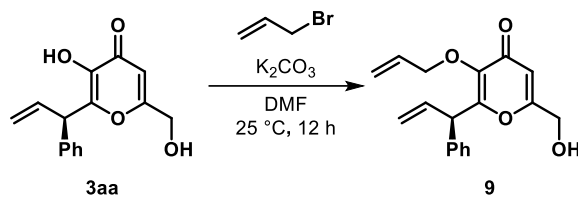

In an oven-dried 10 mL round-bottom flask, **3aa** (42.0 mg, 0.163 mmol, 1.0 equiv.) and K<sub>2</sub>CO<sub>3</sub> (33.7 mg, 0.243 mmol, 1.5 equiv.) were taken in 2 mL of dry DMF under argon atmosphere followed by addition of allyl bromide (17  $\mu$ l, 0.195 mmol, 1.2 equiv.) and allowed to stir at 25 °C for 12 h. Upon completion, the reaction mixture was diluted with 20 mL of water and 20 mL of CH<sub>2</sub>Cl<sub>2</sub>. The organic phase was separated, and the aqueous phase was extracted with CH<sub>2</sub>Cl<sub>2</sub> (3  $\times$  10 mL). The combined organic layer was washed with 20 mL brine, dried over anh. Na<sub>2</sub>SO<sub>4</sub> and concentrated under reduced pressure to obtain a pale yellow residue, which was purified by silica-gel flash column chromatography (1-2% Methanol in CH<sub>2</sub>Cl<sub>2</sub>) to afford **9** as a yellow oil (30.0 mg, 0.100 mmol, 62% yield); **FT-IR (Thin film)**: 3345 (br), 3083 (w), 2922 (m), 1723 (m), 1652 (s), 1611 (s), 1424 (m), 1188 (m) cm<sup>-1</sup>; **<sup>1</sup>H-NMR (400 MHz, CDCl<sub>3</sub>)**:  $\delta$  7.33-7.29 (m, 2H), 7.26-7.22 (m, 3H), 6.46 (s, 1H), 6.20 (ddd, *J* = 17.4, 10.1, 7.6, Hz, 1H), 5.98-5.88 (m, 1H), 5.31-5.27 (m, 2H), 5.20-5.13 (m, 3H), 4.59-4.48 (m, 2H), 4.41 (s, 2H), 4.10 (br, 1H); **<sup>13</sup>C-NMR (100 MHz, CDCl<sub>3</sub>)**:  $\delta$  176.6, 167.3, 161.1, 142.6, 139.0, 135.5, 133.5, 128.9, 128.2, 127.5, 119.1, 118.6, 112.3, 73.1, 60.7, 47.7; **HRMS (ESI+)**: *m/z* calcd. for C<sub>18</sub>H<sub>19</sub>O<sub>4</sub> ([M+H]<sup>+</sup>): 299.1283, Found: 299.1281; **Optical rotation**: [ $\alpha$ ]<sub>D</sub><sup>22</sup> -100.9 (*c* 1.0, CHCl<sub>3</sub>) for an enantiomerically enriched sample with >99.5:0.5 er. The enantiomeric ratio was determined by HPLC analysis using Daicel Chiralpak AD-H column (90:10 *n*-Hexane/ *i*-PrOH, flow rate = 1.0 mL/min, 20 °C,  $\lambda$  = 257 nm,  $\tau_{\text{minor}}$  = 8.5 min,  $\tau_{\text{major}}$  = 11.6 min). See Supporting Information: Part B for HPLC chromatograms.

**Q. Procedure for the ring closing metathesis of 9:**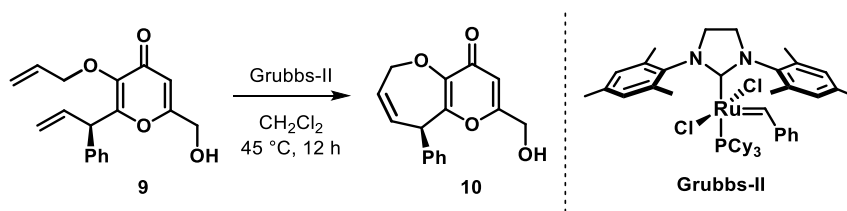

In an oven dried 10 mL 2-necked round-bottom flask, equipped with a reflux condenser, **9** (14.0 mg, 0.047 mmol, 1.0 equiv.) and Grubbs-II (3.2 mg, 0.00375 mmol, 0.08 equiv.) were taken in 2.5 mL of dry and degassed CH<sub>2</sub>Cl<sub>2</sub> under argon. The resulting solution was heated to 45 °C for 12 h at which time starting material was completely consumed. The reaction mixture was concentrated to obtain a yellow residue. Purification by silica-gel flash column chromatography (3-4% methanol in CH<sub>2</sub>Cl<sub>2</sub>) afforded **10** as a light brown sticky liquid (11.0 mg, 0.047 mmol, 87% yield); **FT-IR (Thin film)**: 3420 (br), 2923 (w), 2853 (w), 1653 (s), 1617 (s), 1595 (s), 1452 (m), 1272 (w) cm<sup>-1</sup>; **<sup>1</sup>H-NMR (400 MHz,**

**CDCl<sub>3</sub>**):  $\delta$  7.44-7.42 (m, 2H), 7.33-7.24 (m, 3H), 6.44 (s, 1H), 5.87-5.78 (m, 2H), 4.77-4.72 (m, 1H), 4.47-4.41 (m, 4H); **<sup>13</sup>C-NMR (100 MHz, CDCl<sub>3</sub>)**:  $\delta$  176.6, 166.9, 161.3, 144.7, 138.9, 129.1, 128.4, 128.4, 127.9, 125.4, 112.4, 69.0, 60.9, 49.9; **HRMS (ESI+)**:  $m/z$  calcd. for C<sub>16</sub>H<sub>15</sub>O<sub>4</sub> ([M+H]<sup>+</sup>): 271.0970, Found: 271.0968; **Optical rotation**:  $[\alpha]_D^{22}$  -75.1 (*c* 1.0, CHCl<sub>3</sub>) for an enantiomerically enriched sample with >99.5:0.5 er. The enantiomeric ratio was determined by HPLC analysis using Daicel Chiralpak AD-H column (85:15 *n*-Hexane/*i*-PrOH, flow rate = 1.0 mL/min, 20 °C, I = 259 nm,  $\tau_{\text{major}}$  = 9.9 min,  $\tau_{\text{minor}}$  = 13.5 min). See Supporting Information: Part B for HPLC chromatograms.

## R. Procedure for the triflyl protection of **3ba**:

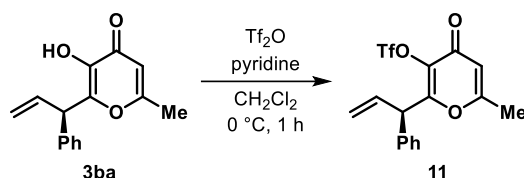

In an oven and vacuum-dried 10 mL round-bottom flask equipped with a magnetic stir bar, **3ba** (40 mg, 0.165 mmol, 1.0 equiv.) was dissolved in 1.0 mL of dry CH<sub>2</sub>Cl<sub>2</sub> under a positive argon pressure and cooled to 0 °C. To this solution, pyridine (36  $\mu$ L, 0.445 mmol, 2.7 equiv.) was added followed by dropwise addition of Tf<sub>2</sub>O (36  $\mu$ L, 0.214 mmol, 1.3 equiv.) and the resulting mixture was stirred at 0 °C for 1 h. Upon completion, the reaction mixture was quenched with 5 mL of 1(N) HCl solution. The organic layer was separated, and the aqueous layer was extracted with CH<sub>2</sub>Cl<sub>2</sub> (5 mL  $\times$  3). Combined organic layer was washed with brine (10 mL), dried over anh. Na<sub>2</sub>SO<sub>4</sub> and concentrated under reduced pressure to obtain a dark red residue, which was purified by silica-gel flash column chromatography (CH<sub>2</sub>Cl<sub>2</sub> only) to obtain **11** as yellow liquid (36.0 mg, 0.096 mmol, 58% yield); **FT-IR (Thin film)**: 3072 (w), 2921 (m), 2708 (w), 1722 (m), 1667 (s), 1418 (s), 1213 (s), 1123 (s), 855 (m) cm<sup>-1</sup>; **<sup>1</sup>H-NMR (400 MHz, CDCl<sub>3</sub>)**:  $\delta$  7.39-7.35 (m, 2H), 7.33-7.27 (m, 3H), 6.25 (s, 1H), 6.20 (ddd, *J* = 7.4, 10.1, 17.3 Hz, 1H), 5.41 (d, *J* = 10.2 Hz, 1H), 5.28 (d, *J* = 17.1 Hz, 1H), 5.00 (d, *J* = 7.4 Hz, 1H), 2.27 (s, 3H); **<sup>13</sup>C-NMR (100 MHz, CDCl<sub>3</sub>)**:  $\delta$  171.2, 166.1, 166.1, 162.4, 137.1, 137.0, 133.6, 129.1, 128.1, 120.0, 118.5 (q, *J* = 320.2 Hz), 114.7, 48.0, 19.7; **HRMS (ESI+)**:  $m/z$  calcd. for C<sub>16</sub>H<sub>13</sub>F<sub>3</sub>O<sub>5</sub>SNa ([M+Na]<sup>+</sup>): 397.0333, Found: 397.0330; **Optical rotation**:  $[\alpha]_D^{22}$  -57.8 (*c* 2.0, CHCl<sub>3</sub>) for an enantiomerically enriched sample with >99.5:0.5 er. The enantiomeric ratio was determined by HPLC analysis using Daicel Chiralpak IH column (90:10 *n*-Hexane/*i*-PrOH, flow rate = 1.0 mL/min, 20 °C, I = 221 nm,  $\tau_{\text{minor}}$  = 12.5 min,  $\tau_{\text{major}}$  = 20.3 min). See Supporting Information: Part B for HPLC chromatograms.

**S. Procedure for the Suzuki cross-coupling of 11 with phenyl boronic acid:**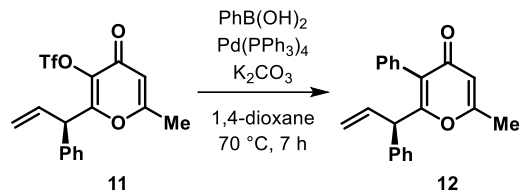

In an oven and vacuum-dried 10 mL round-bottom flask equipped with a magnetic stir bar, **11** (20 mg, 0.053 mmol, 1.0 equiv.), Pd(PPh<sub>3</sub>)<sub>4</sub> (3.1 mg, 0.00265 mmol, 5.0 mol%), K<sub>2</sub>CO<sub>3</sub> (29.3 mg, 0.212 mmol, 4.0 equiv.) and phenyl boronic acid (12.9 mg, 0.106 mmol, 2.0 equiv.) were taken in 0.6 mL of dry 1,4-dioxane under a positive argon pressure, heated to 70 °C and allowed to stir for 7 h. Upon completion, the reaction mixture was quenched with 3 mL of saturated NH<sub>4</sub>Cl solution and diluted with 3 mL of distilled water. The organic layer was separated, and the aqueous layer was extracted with CH<sub>2</sub>Cl<sub>2</sub> (3 mL × 3). Combined organic layer was washed with brine (10 mL), dried over anh. Na<sub>2</sub>SO<sub>4</sub> and concentrated under reduced pressure to obtain a dark brown residue, which was purified by silica-gel flash column chromatography (1% methanol in CH<sub>2</sub>Cl<sub>2</sub>) to obtain **12** as a yellow liquid (13.0 mg, 0.043 mmol, 85% yield); **FT-IR (Thin film)**: 3446 (br), 2923 (w), 2853 (w), 1659 (s), 1623 (s), 1397 (m) cm<sup>-1</sup>; **<sup>1</sup>H-NMR (400 MHz, CDCl<sub>3</sub>)**:  $\delta$  7.45-7.38 (m, 4H), 7.33-7.28 (m, 3H), 7.25-7.23 (m, 1H), 7.16-7.15 (m, 2H), 6.21 (s, 1H), 6.24-6.16 (m, 1H), 5.29 (d, *J* = 10.1 Hz, 1H), 5.09 (d, *J* = 17.0 Hz, 1H), 4.60 (d, *J* = 7.4 Hz, 1H), 2.25 (s, 3H); **<sup>13</sup>C-NMR (100 MHz, CDCl<sub>3</sub>)**:  $\delta$  178.9, 165.0, 164.5, 139.3, 136.2, 132.3, 130.2, 128.8, 128.7, 128.3, 128.1, 127.4, 127.2, 118.3, 113.9, 50.9, 19.8; **HRMS (ESI+)**: *m/z* calcd. for C<sub>21</sub>H<sub>19</sub>O<sub>2</sub> ([M+H]<sup>+</sup>): 303.1385, Found: 303.1384; **Optical rotation**: [ $\alpha$ ]<sub>D</sub><sup>22</sup> -120.7 (*c* 1.0, CHCl<sub>3</sub>) for an enantiomerically enriched sample with >99.5:0.5 er. The enantiomeric ratio was determined by HPLC analysis using Daicel Chiralpak IH column (90:10 *n*-Hexane/ *i*-PrOH, flow rate = 1.0 mL/min, 20 °C, I = 224 nm,  $\tau_{\text{minor}}$  = 38.9 min,  $\tau_{\text{major}}$  = 43.7 min). See Supporting Information: Part B for HPLC chromatograms.

**T. Attempted reductive removal of triflate in 11:**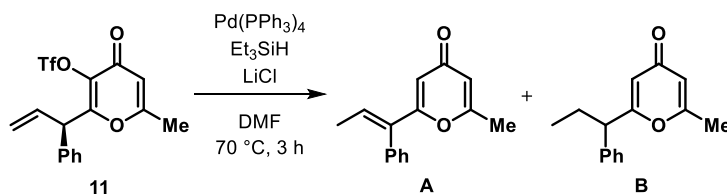

In an oven and vacuum-dried 10 mL round-bottom flask equipped with a magnetic stir bar, **11** (15 mg, 0.040 mmol, 1.0 equiv.), Pd(PPh<sub>3</sub>)<sub>4</sub> (9.2 mg, 0.008 mmol, 20.0 mol%) and LiCl (15.0 mg, 0.35 mmol, 8.75 equiv.) were taken in 2 mL of dry DMF under a positive argon pressure. Then Et<sub>3</sub>SiH (0.13 mL, 0.816 mmol, 20.0 equiv.) was added into it and heated to 70 °C and allowed to stir for 3 h. Upon completion, the reaction mixture was diluted with 5 mL of Et<sub>2</sub>O and 20 mL of distilled water. The organic layer was separated, and the aqueous layer was extracted with Et<sub>2</sub>O (5 mL × 3). Combined

organic layer was washed with brine (10 mL), dried over anh. Na<sub>2</sub>SO<sub>4</sub> and concentrated under reduced pressure to obtain a dark yellow residue, which was purified by silica-gel flash column chromatography (30-40% EtOAc in Pet ether) to obtain mixture of isomerized product and hydrogenation product as an inseperable mixture (8.0 mg); **<sup>1</sup>H-NMR (400 MHz, CDCl<sub>3</sub>):**  $\delta$  7.42-7.31 (m, 6H), 7.26-7.23 (m, 4H), 7.15-7.12 (m, 2H), 6.81 (q,  $J$  = 7.1 Hz, 1H) [for **A**], 6.18 (d,  $J$  = 2.2 Hz, 1H), 6.07 (d,  $J$  = 1.5 Hz, 1H), 6.05 (d,  $J$  = 1.4 Hz, 1H), 5.75 (d,  $J$  = 2.1 Hz, 1H), 3.56 (t,  $J$  = 7.7 Hz, 1H) [for **B**], 2.32 (s, 3H) [for **A**], 2.21 (s, 3H) [for **B**], 2.13-2.07 (m, 1H), 1.99-1.90 (m, 1H) [for **B**], 1.71 (d,  $J$  = 7.2 Hz, 3H) [for **A**], 0.92 (t,  $J$  = 7.4 Hz, 3H) [for **B**]; **<sup>13</sup>C-NMR (100 MHz, CDCl<sub>3</sub>):**  $\delta$  180.9, 180.6, 170.5, 165.9, 165.2, 164.1, 139.8, 135.4, 135.0, 131.4, 130.0, 128.9, 128.9, 128.2, 128.1, 127.5, 114.0, 113.8, 113.1, 113.0, 51.9, 26.2, 20.0, 19.9, 15.6, 12.3; **HRMS (ESI+):**  $m/z$  calcd. for C<sub>15</sub>H<sub>15</sub>O<sub>2</sub> ([M+H]<sup>+</sup>): 227.1072, Found: 227.1069.

**SUPPORTING INFORMATION: PART B**

**Hydroxy-directed iridium-catalyzed enantioselective formal  $\beta$ -C(sp<sup>2</sup>)-H allylic alkylation of  $\alpha,\beta$ -unsaturated carbonyls**

Sankash Mitra, Rahul Sarkar, Aditya Chakrabarty and Santanu Mukherjee\*

*Department of Organic Chemistry, Indian Institute of Science, Bangalore 560 012, INDIA*

\*Corresponding author: E-mail: [sm@iisc.ac.in](mailto:sm@iisc.ac.in)

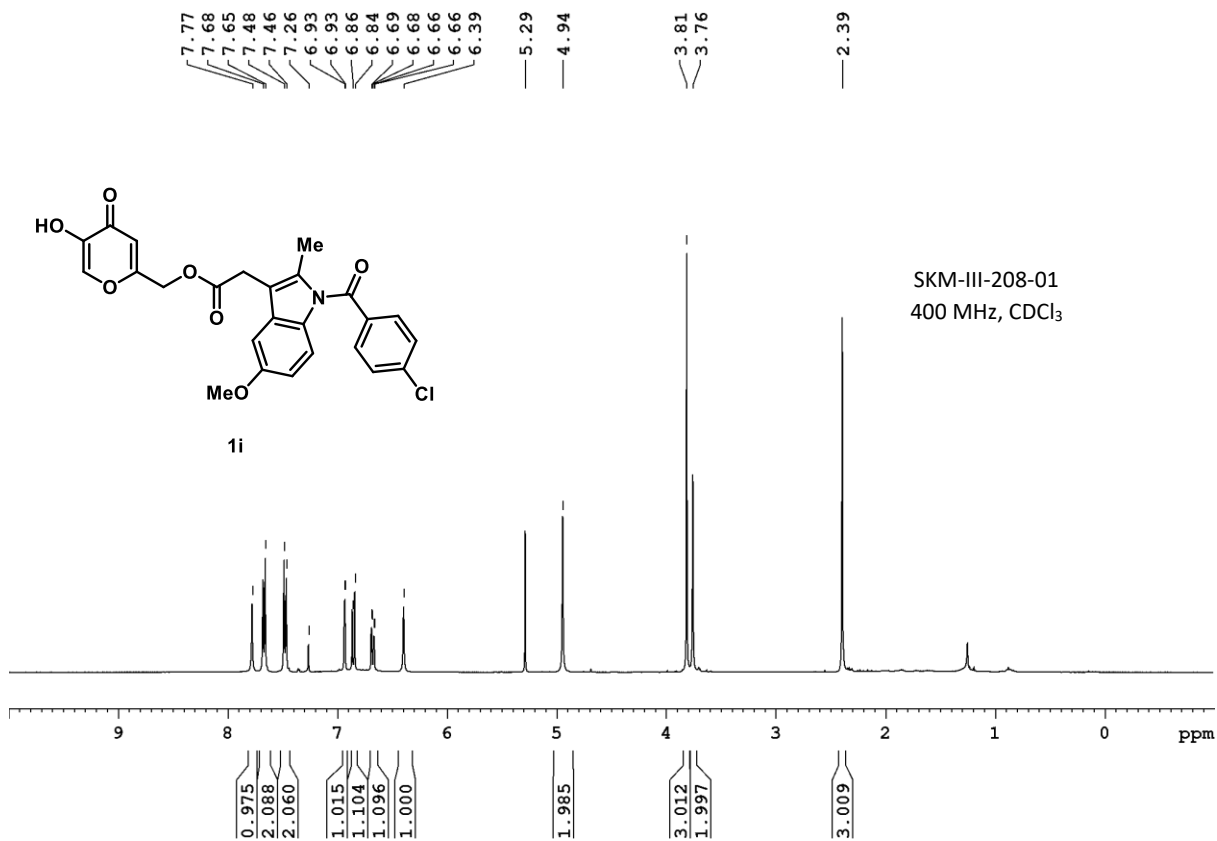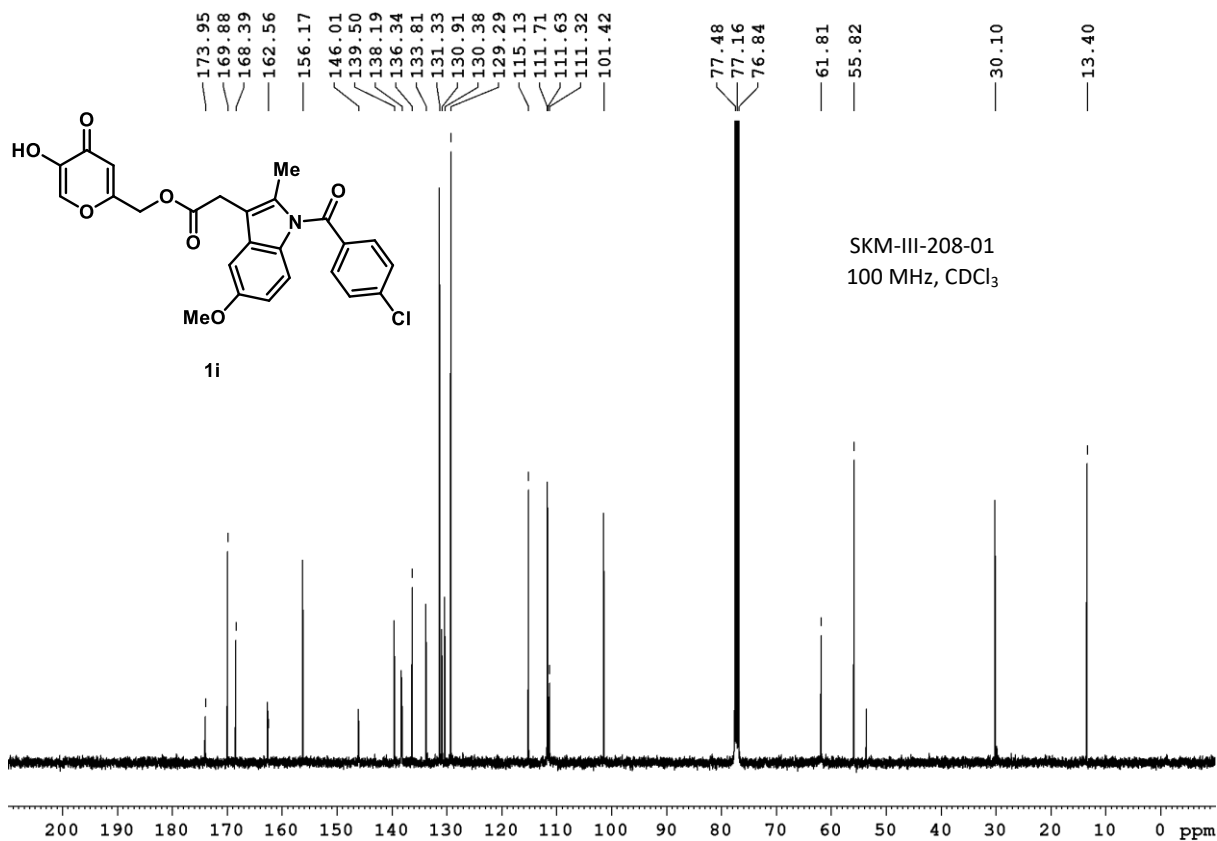

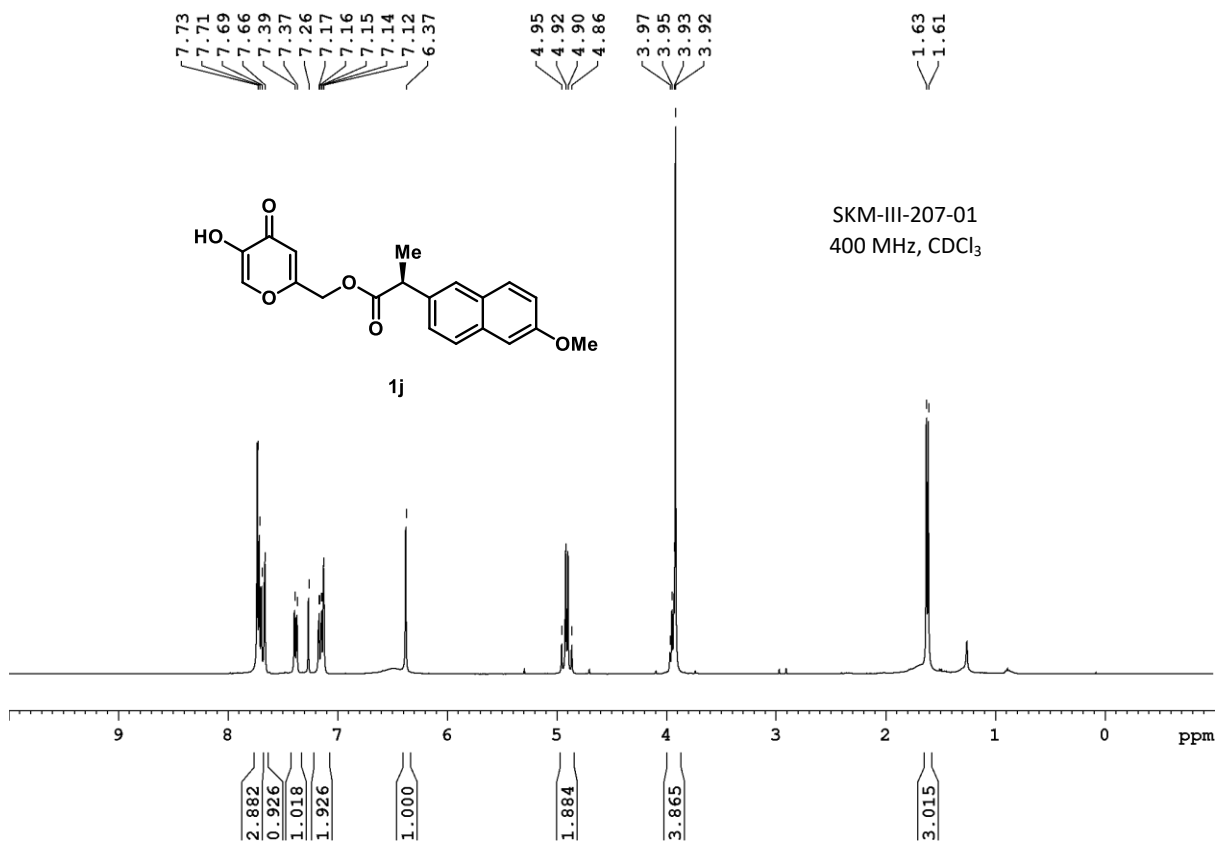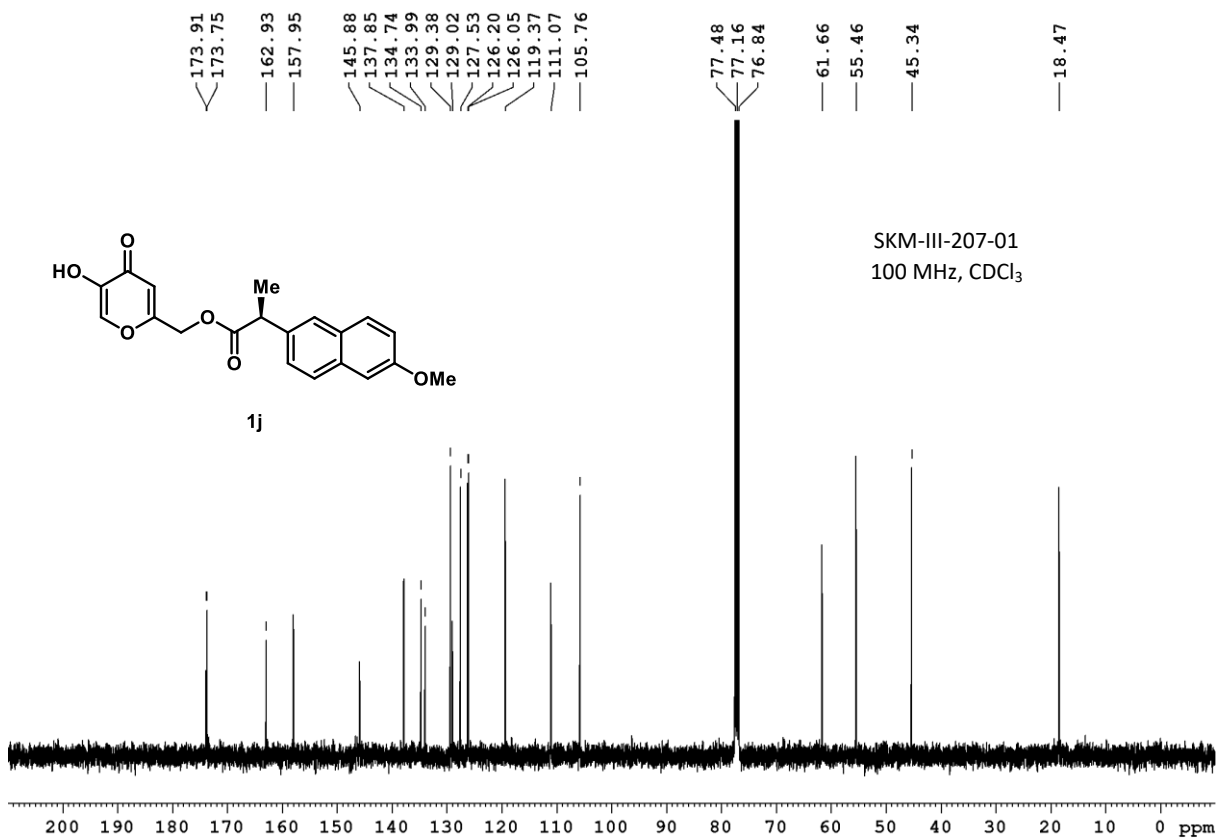



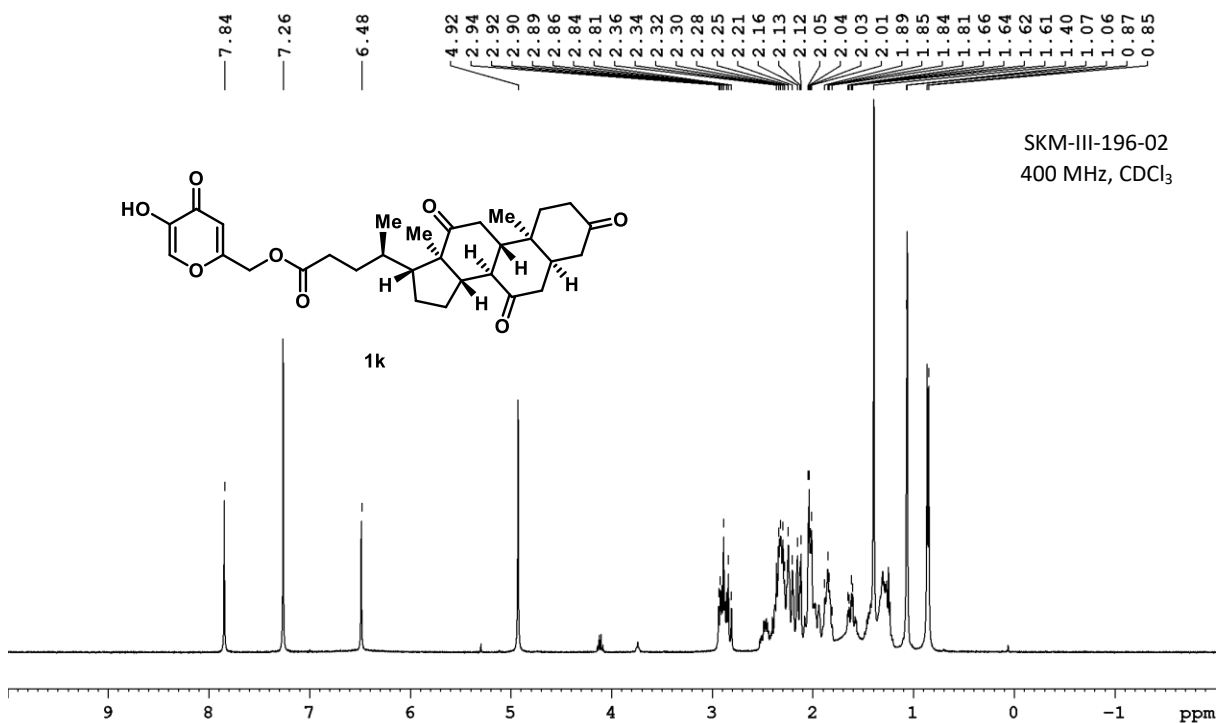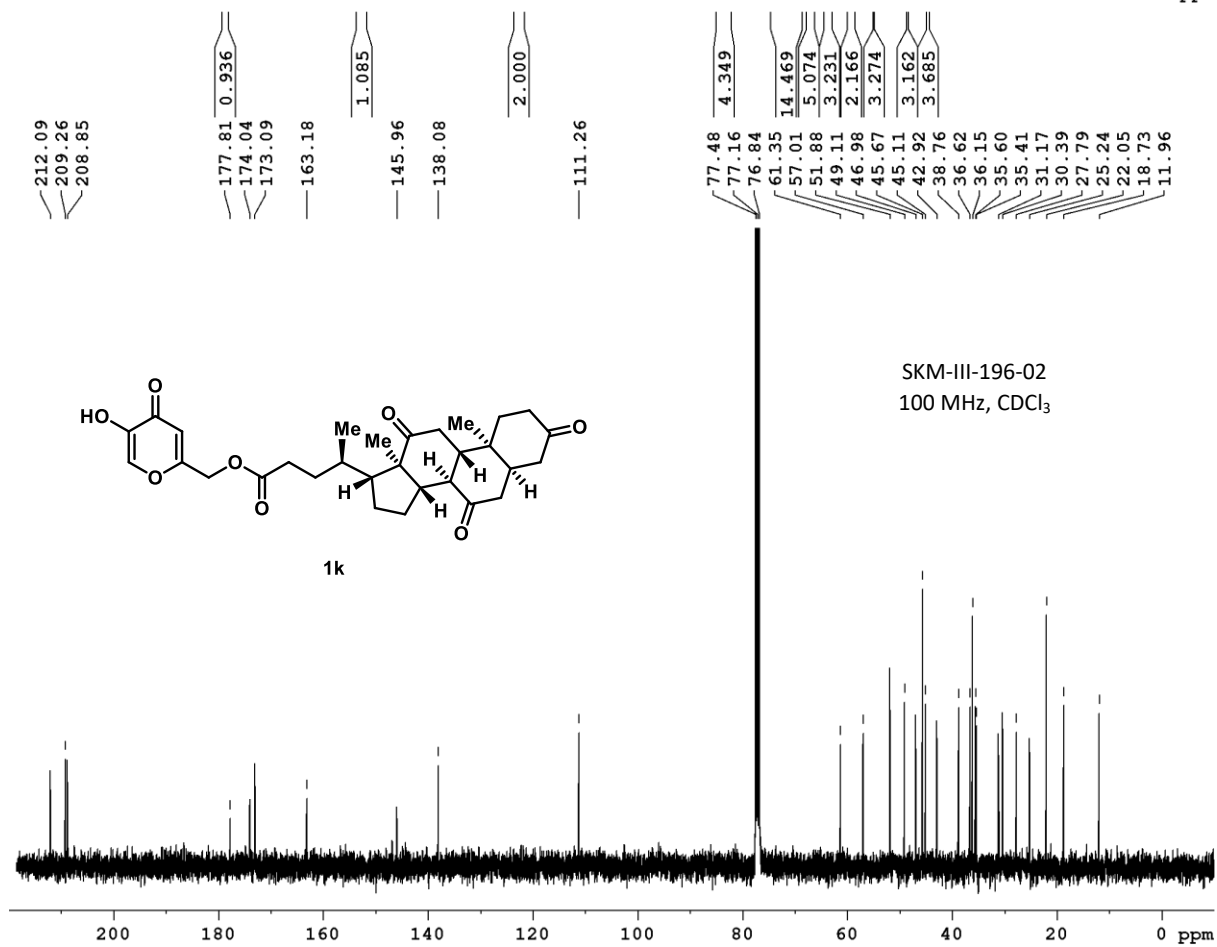

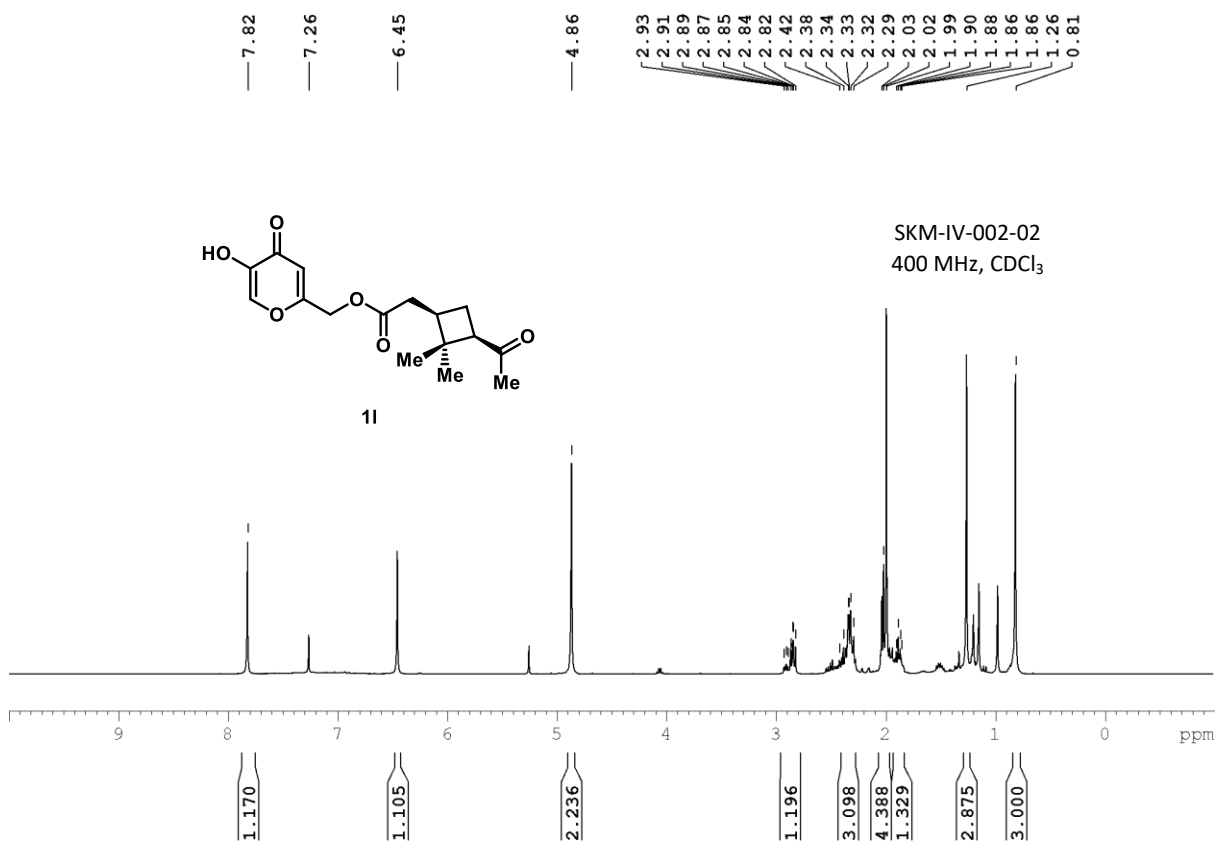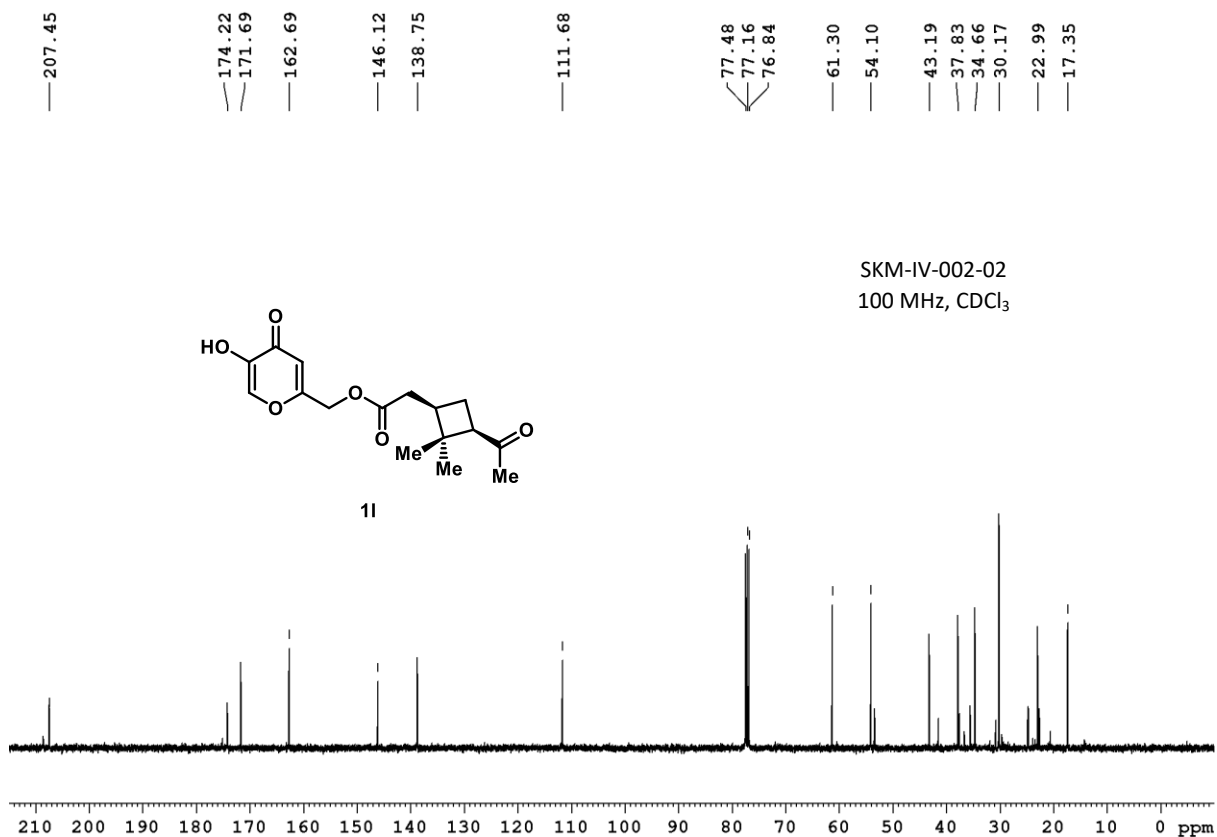

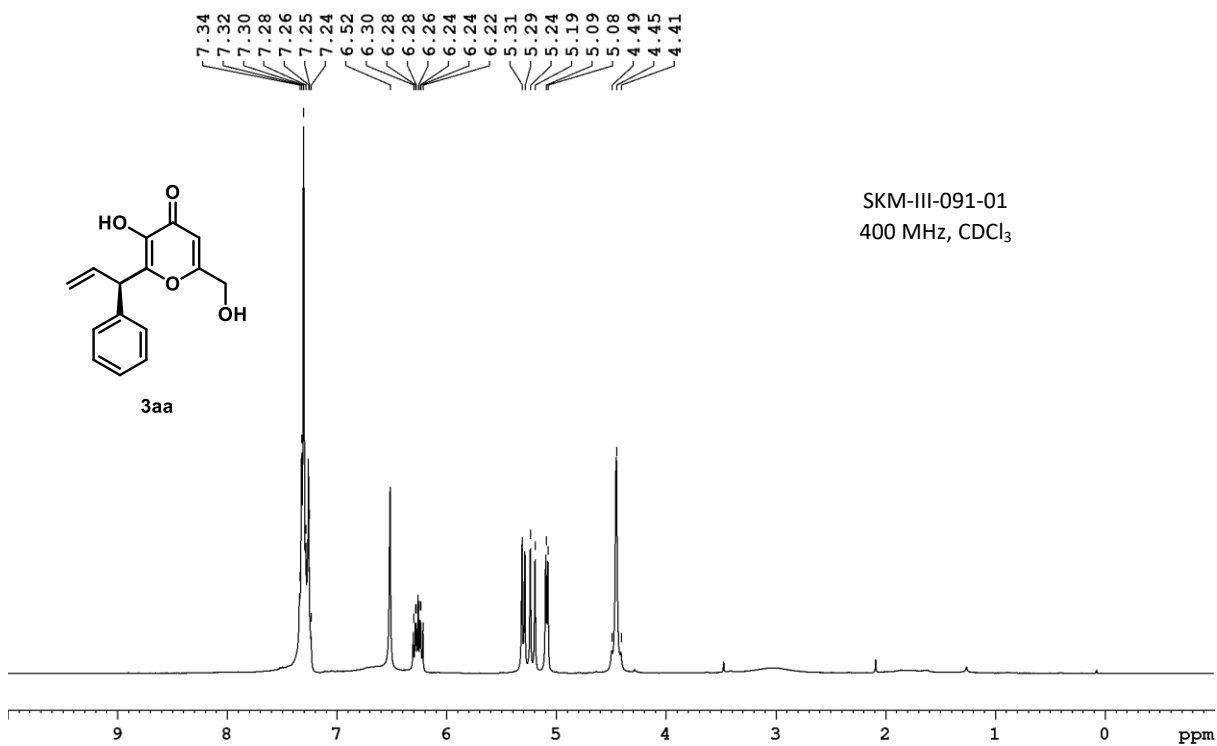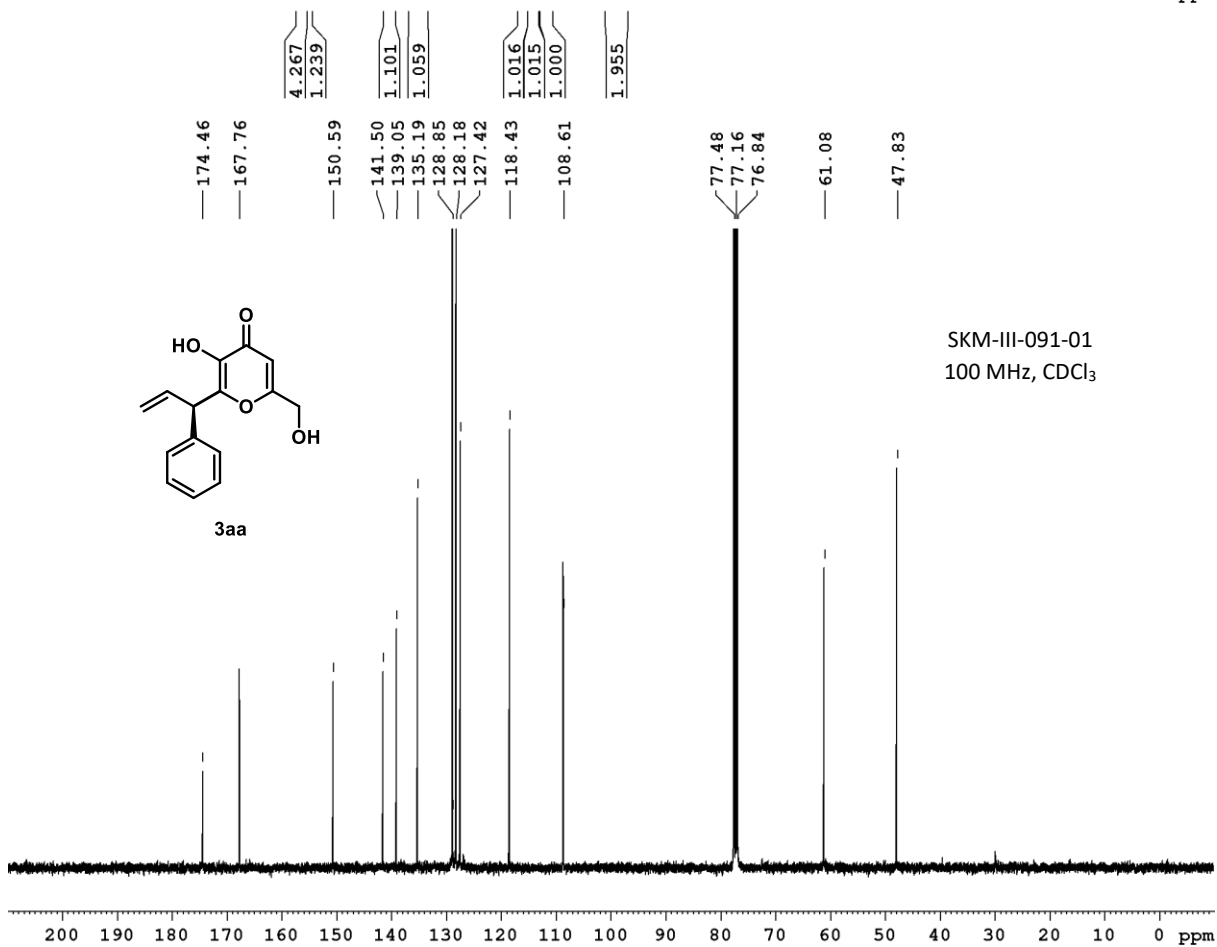

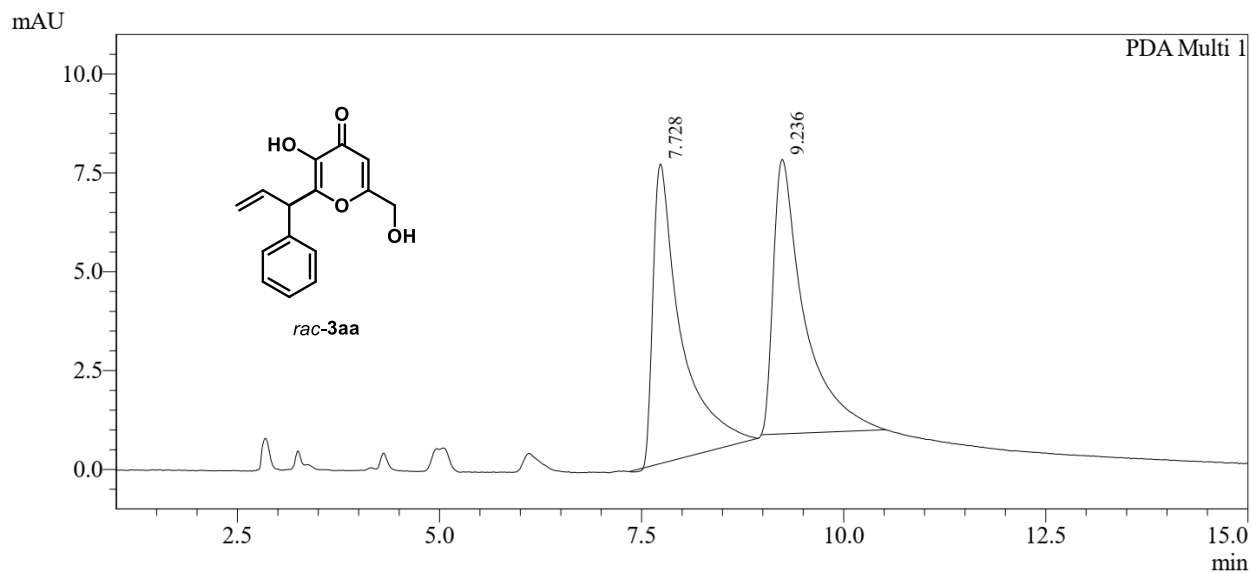

PeakTable

PDA Ch1 277nm 4nm

| Peak# | Ret. Time | Area   | Area %  |
|-------|-----------|--------|---------|
| 1     | 7.728     | 181481 | 49.623  |
| 2     | 9.236     | 184241 | 50.377  |
| Total |           | 365722 | 100.000 |

Phenomenex Cellulose-1 column (85:15 *n*-Hexane/*i*-PrOH, 1.0 mL/min, 20 °C)

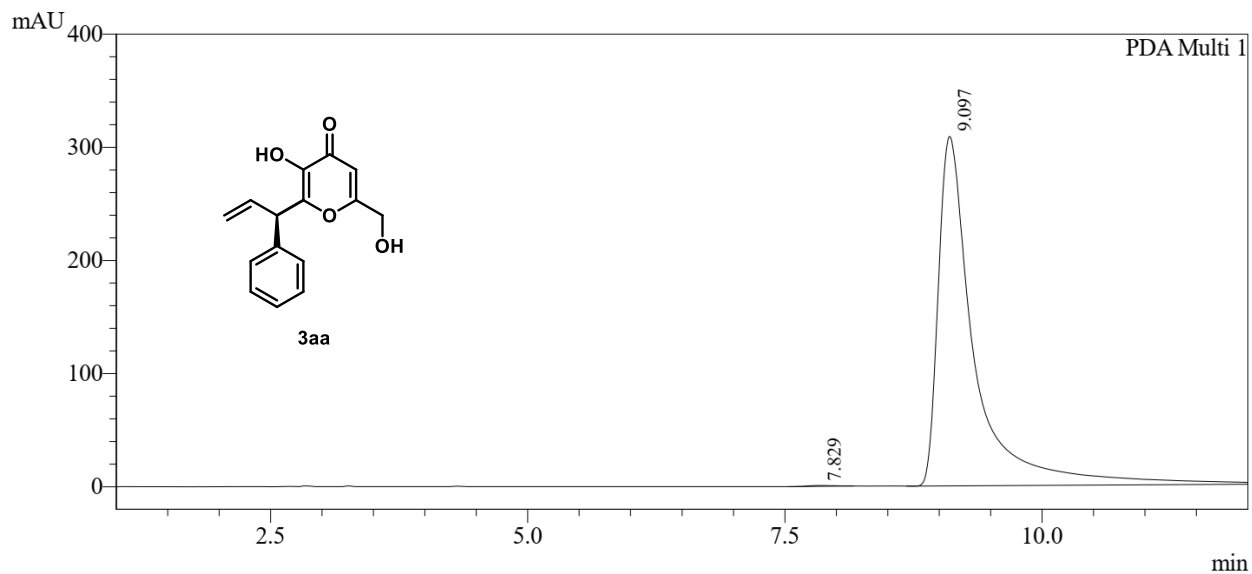

PeakTable

PDA Ch1 277nm 4nm

| Peak# | Ret. Time | Area    | Area %  |
|-------|-----------|---------|---------|
| 1     | 7.829     | 12326   | 0.160   |
| 2     | 9.097     | 7715447 | 99.840  |
| Total |           | 7727773 | 100.000 |

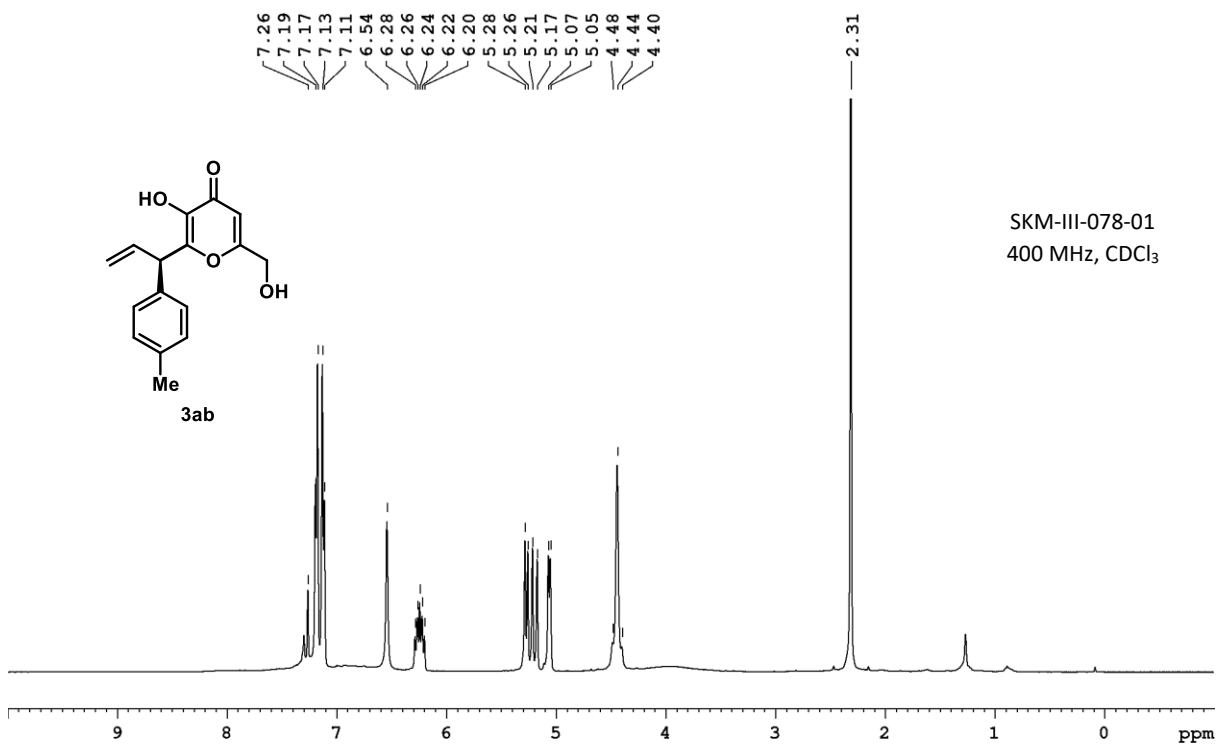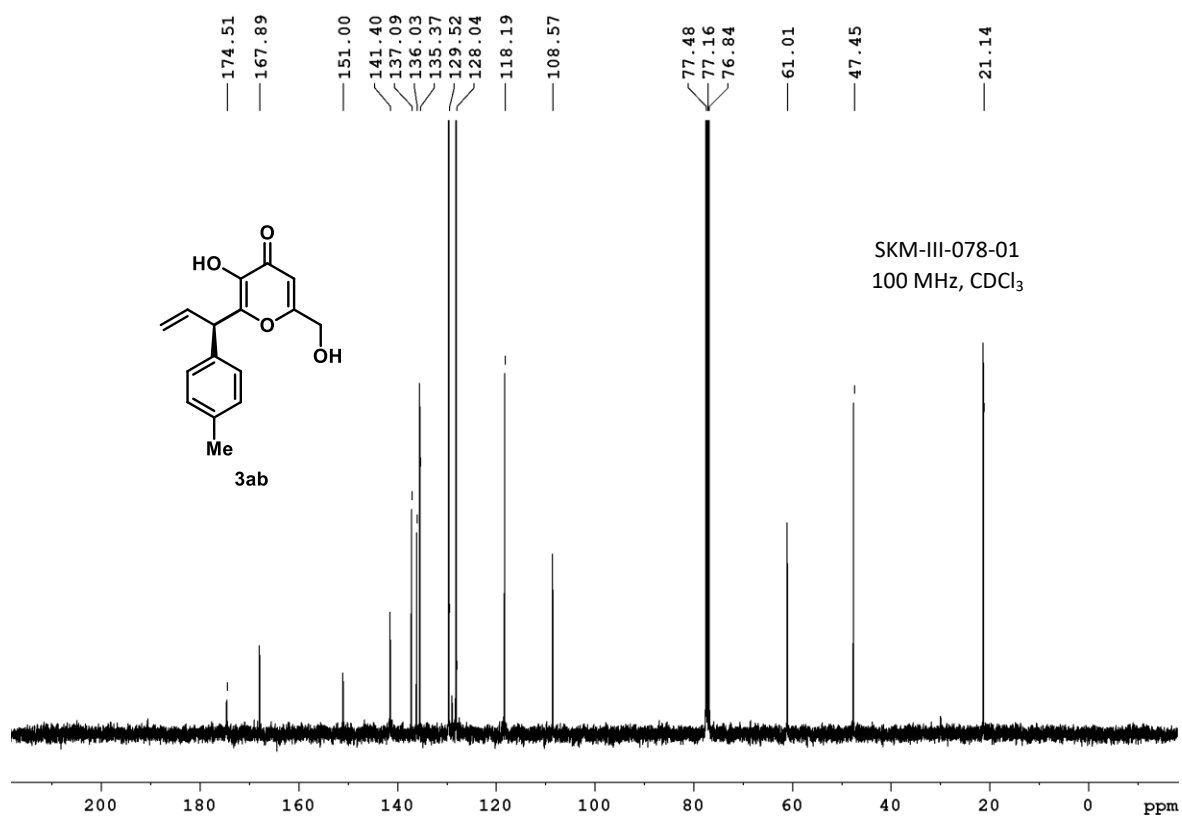

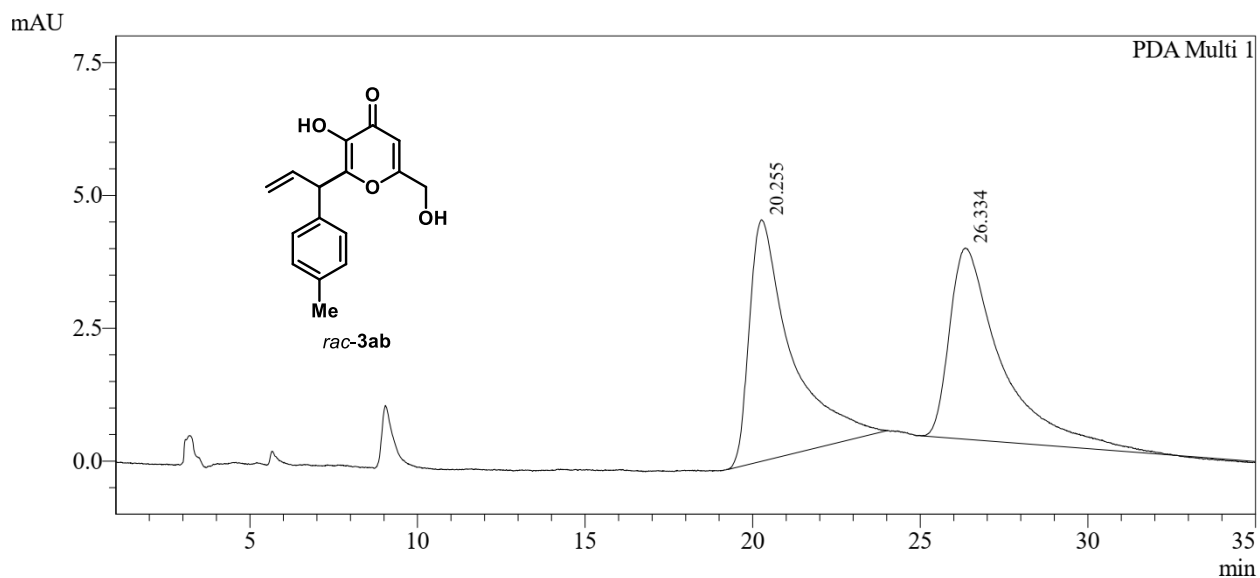

PeakTable

PDA Ch1 285nm 4nm

| Peak# | Ret. Time | Area   | Area %  |
|-------|-----------|--------|---------|
| 1     | 20.255    | 392668 | 50.512  |
| 2     | 26.334    | 384715 | 49.488  |
| Total |           | 777383 | 100.000 |

Daicel Chiralpak AS-H column (90:10 *n*-Hexane/*i*-PrOH, 1.0 mL/min, 20 °C)

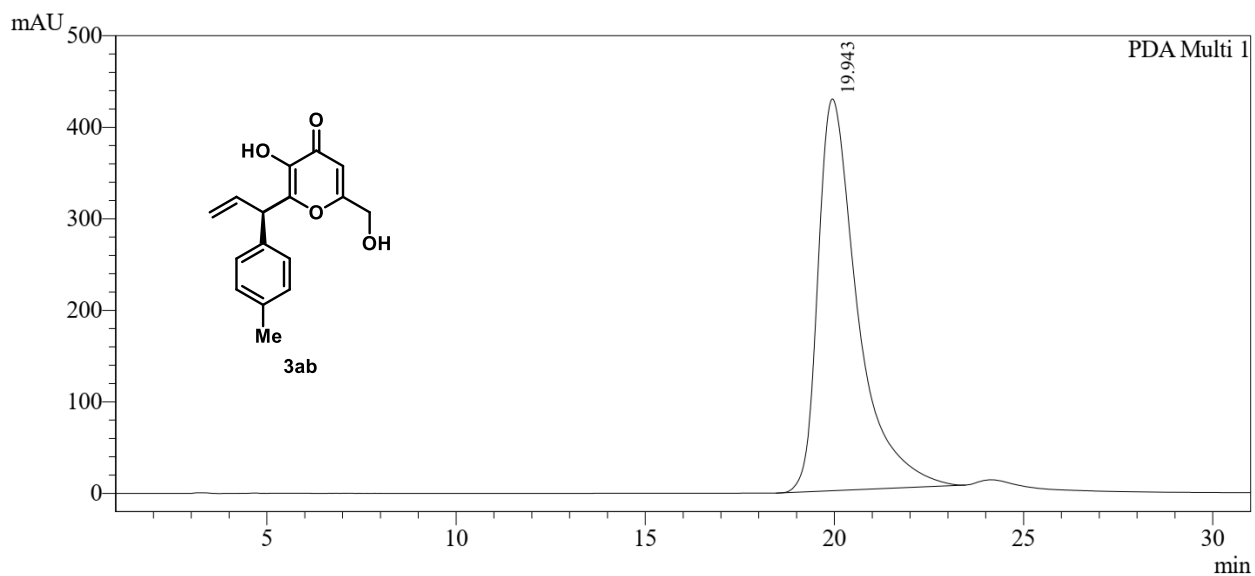

PeakTable

PDA Ch1 285nm 4nm

| Peak# | Ret. Time | Area     | Area %  |
|-------|-----------|----------|---------|
| 1     | 19.943    | 31150645 | 100.000 |
| Total |           | 31150645 | 100.000 |

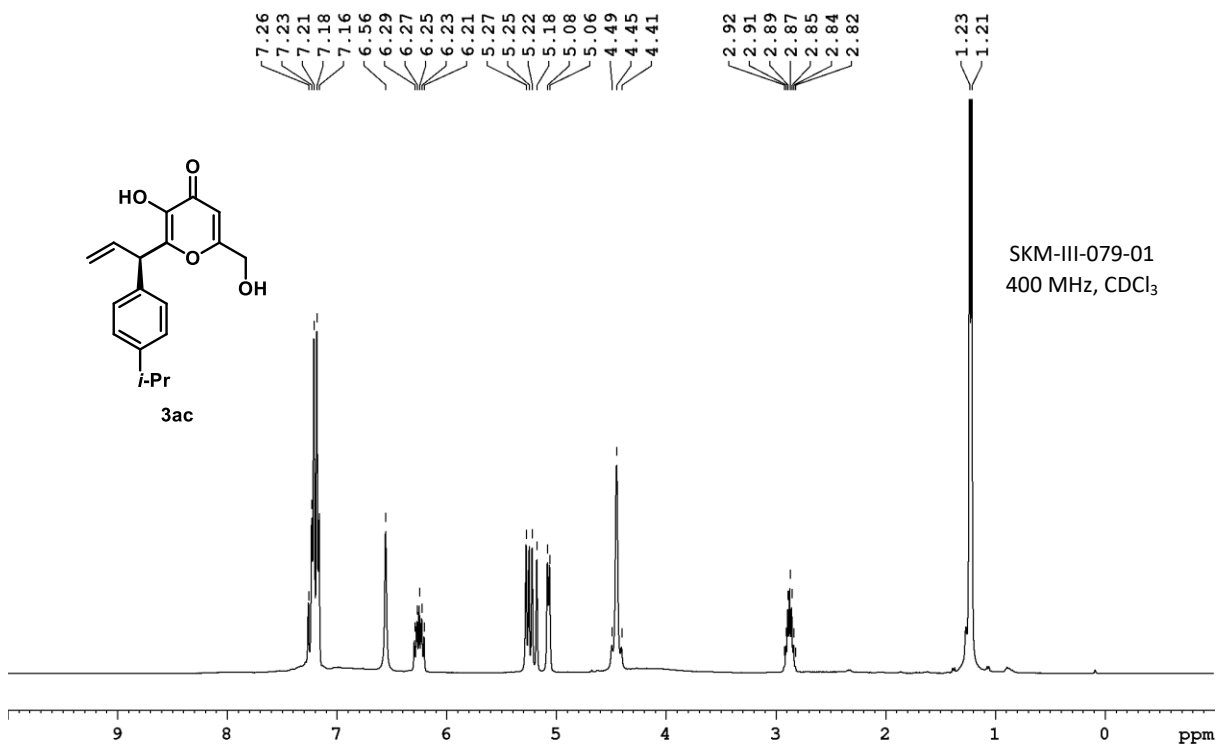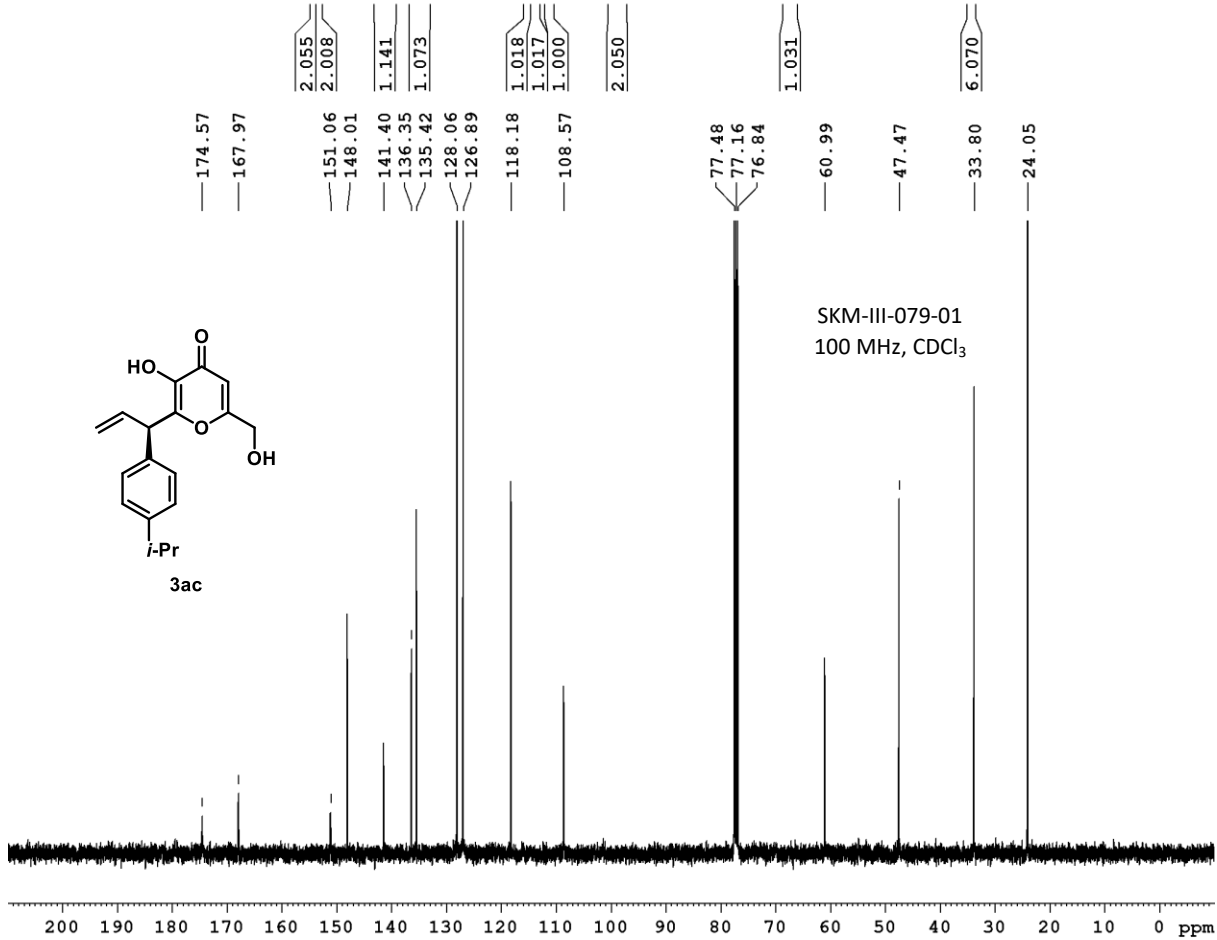

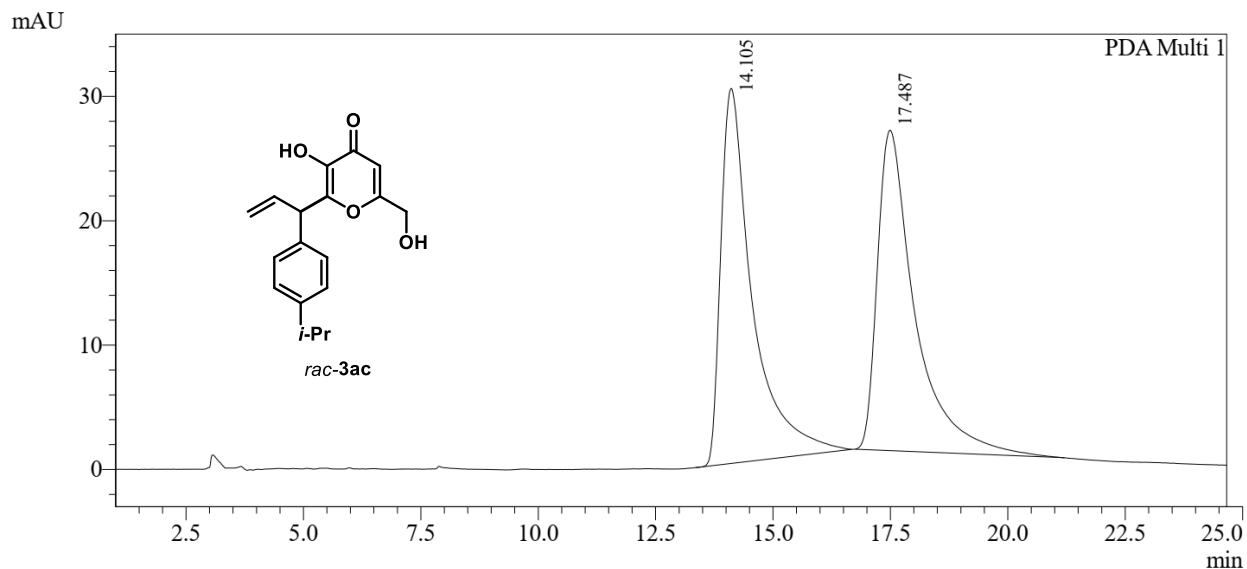

PeakTable

PDA Ch1 277nm 4nm

| Peak# | Ret. Time | Area    | Area %  |
|-------|-----------|---------|---------|
| 1     | 14.105    | 1408829 | 49.574  |
| 2     | 17.487    | 1433019 | 50.426  |
| Total |           | 2841847 | 100.000 |

Daicel Chiralpak IH column (90:10 *n*-Hexane/*i*-PrOH, 1.0 mL/min, 20 °C)

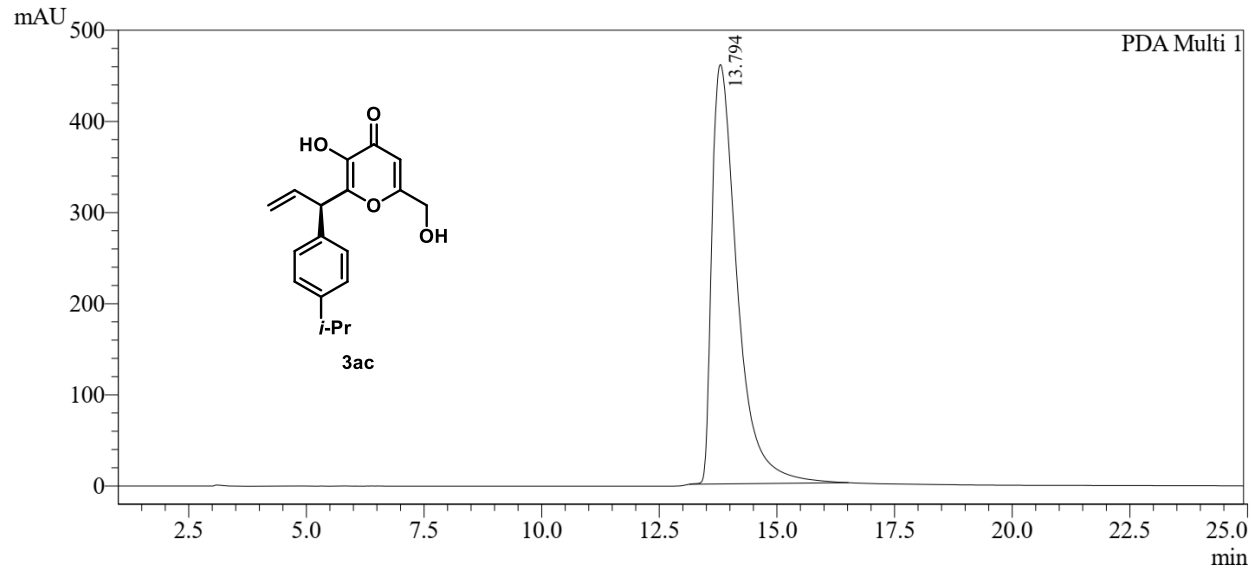

PeakTable

PDA Ch1 277nm 4nm

| Peak# | Ret. Time | Area     | Area %  |
|-------|-----------|----------|---------|
| 1     | 13.794    | 17289900 | 100.000 |
| Total |           | 17289900 | 100.000 |



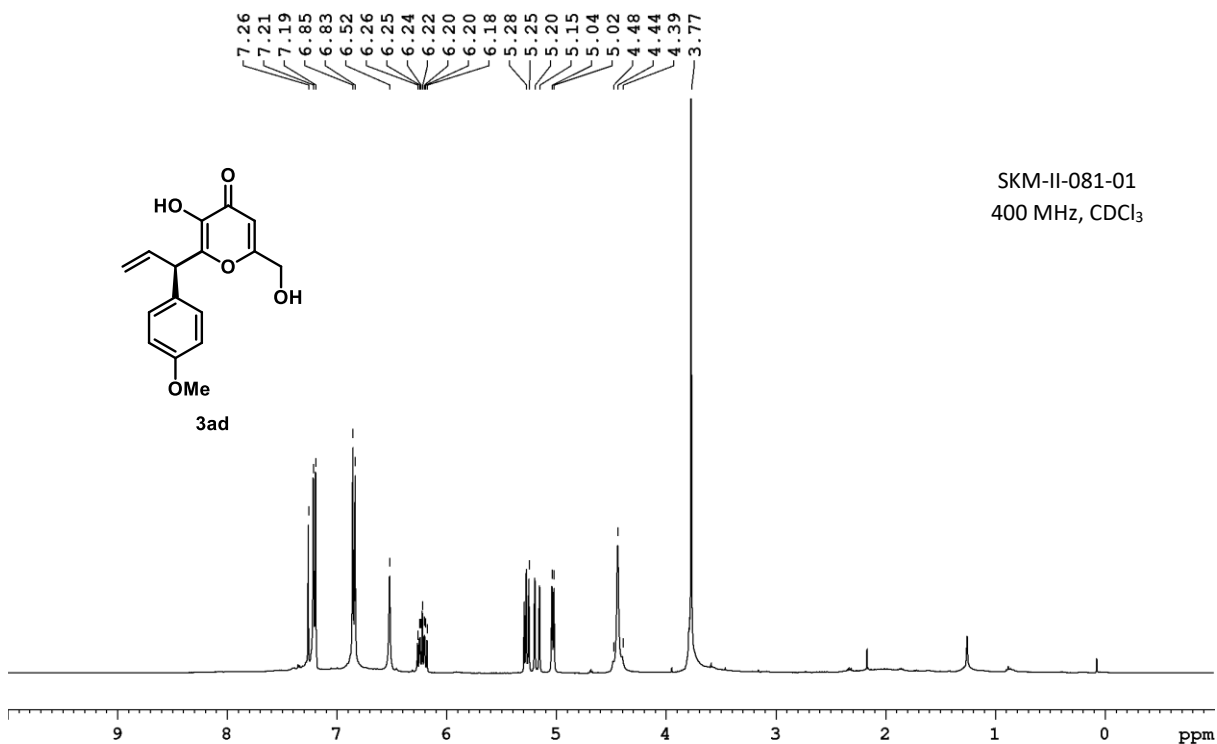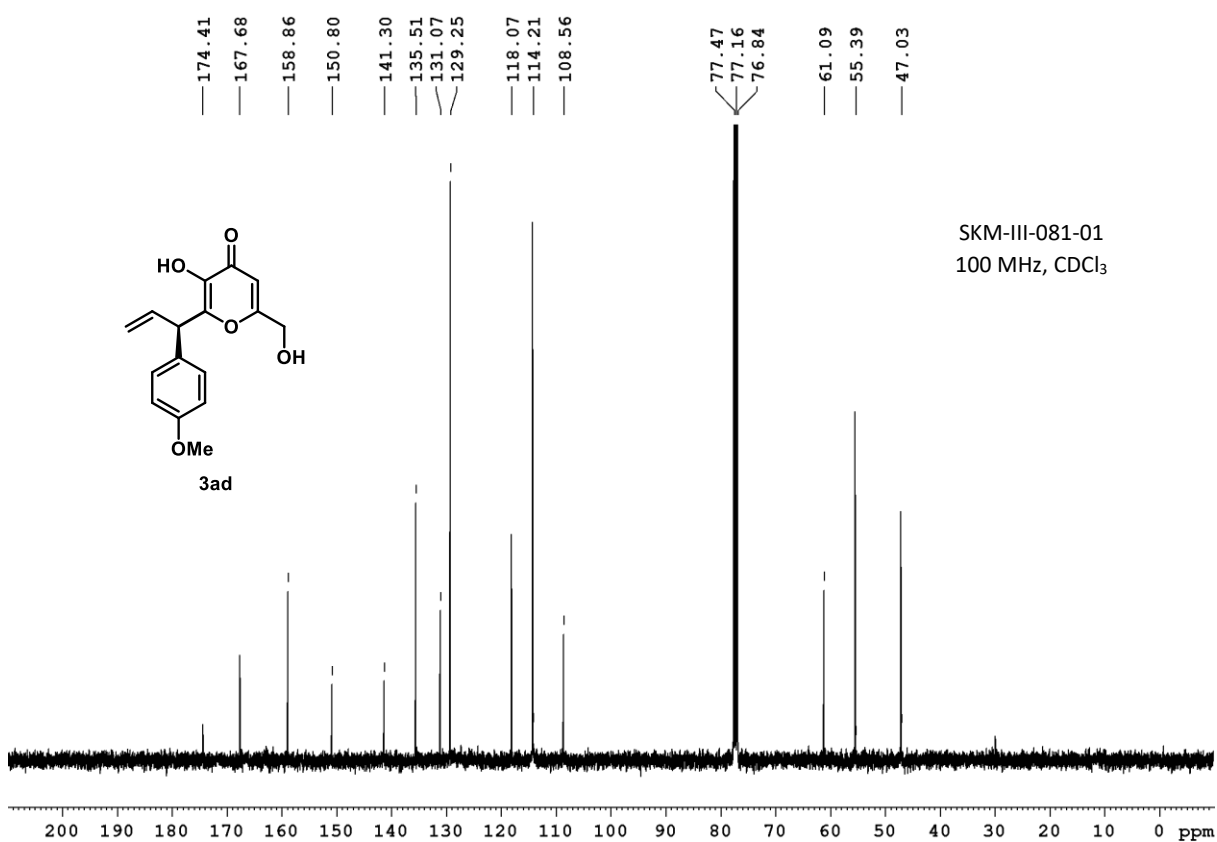

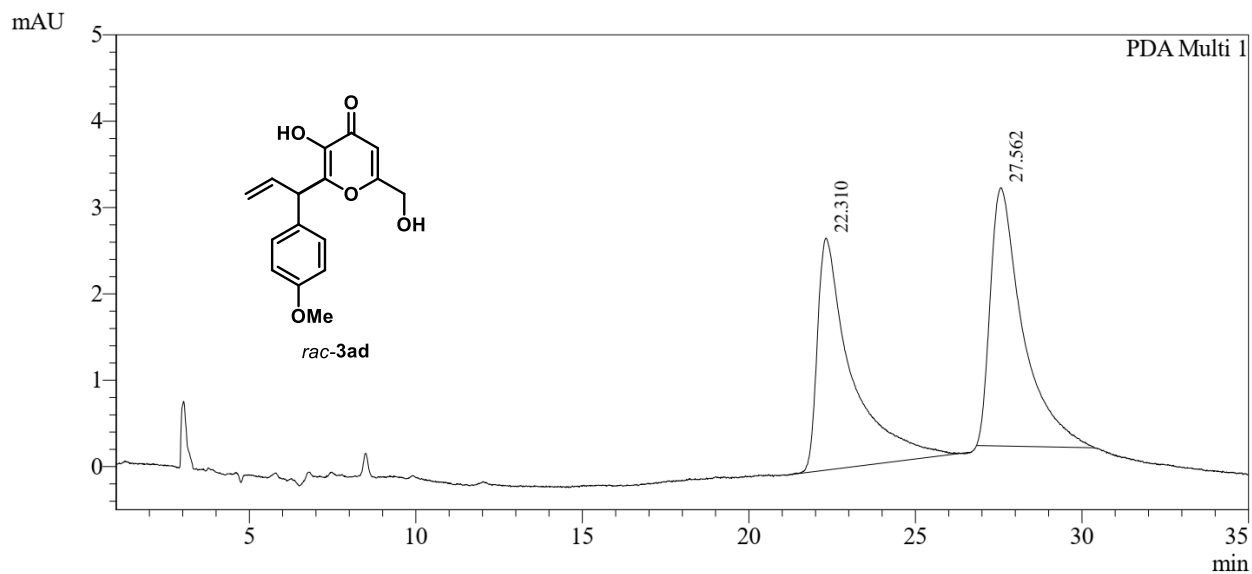

PeakTable

PDA Ch1 279nm 4nm

| Peak# | Ret. Time | Area   | Area %  |
|-------|-----------|--------|---------|
| 1     | 22.310    | 191486 | 48.511  |
| 2     | 27.562    | 203241 | 51.489  |
| Total |           | 394727 | 100.000 |

Daicel Chiralpak IG column (85:15 *n*-Hexane/*i*-PrOH, 1.0 mL/min, 20 °C)

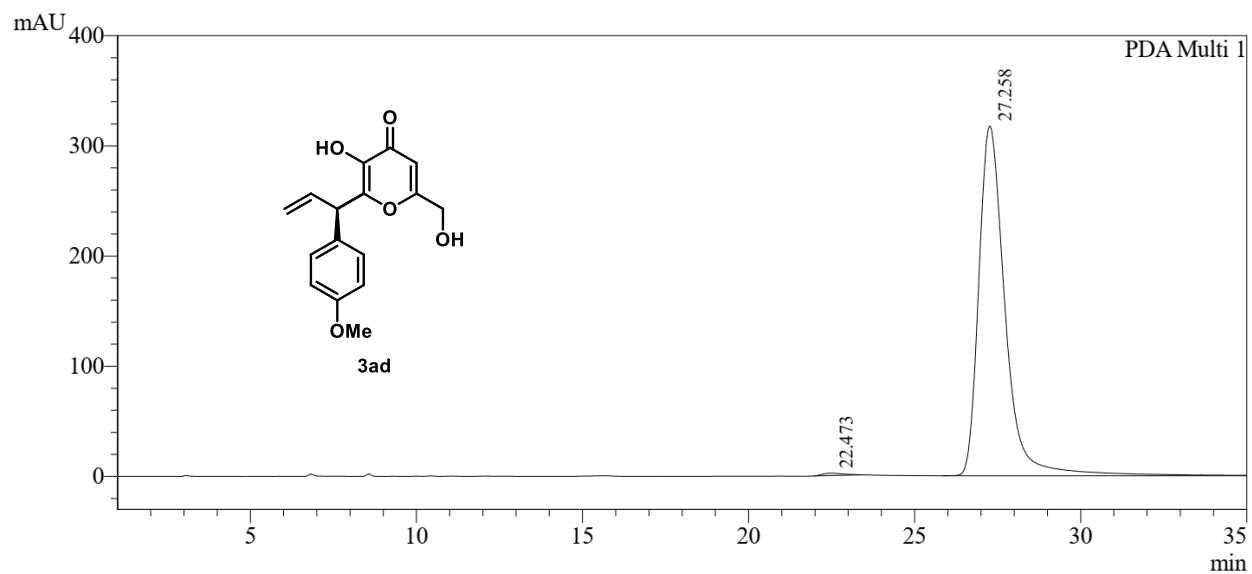

PeakTable

PDA Ch1 279nm 4nm

| Peak# | Ret. Time | Area     | Area %  |
|-------|-----------|----------|---------|
| 1     | 22.473    | 100159   | 0.566   |
| 2     | 27.258    | 17597829 | 99.434  |
| Total |           | 17697988 | 100.000 |

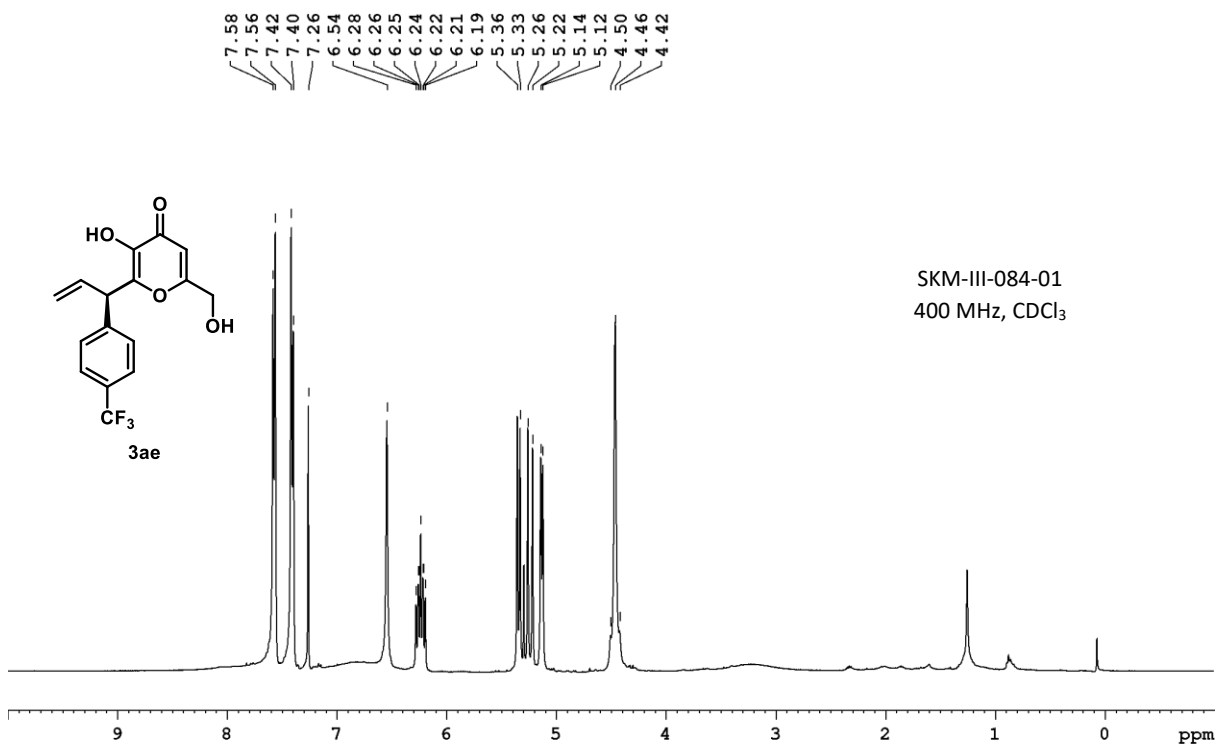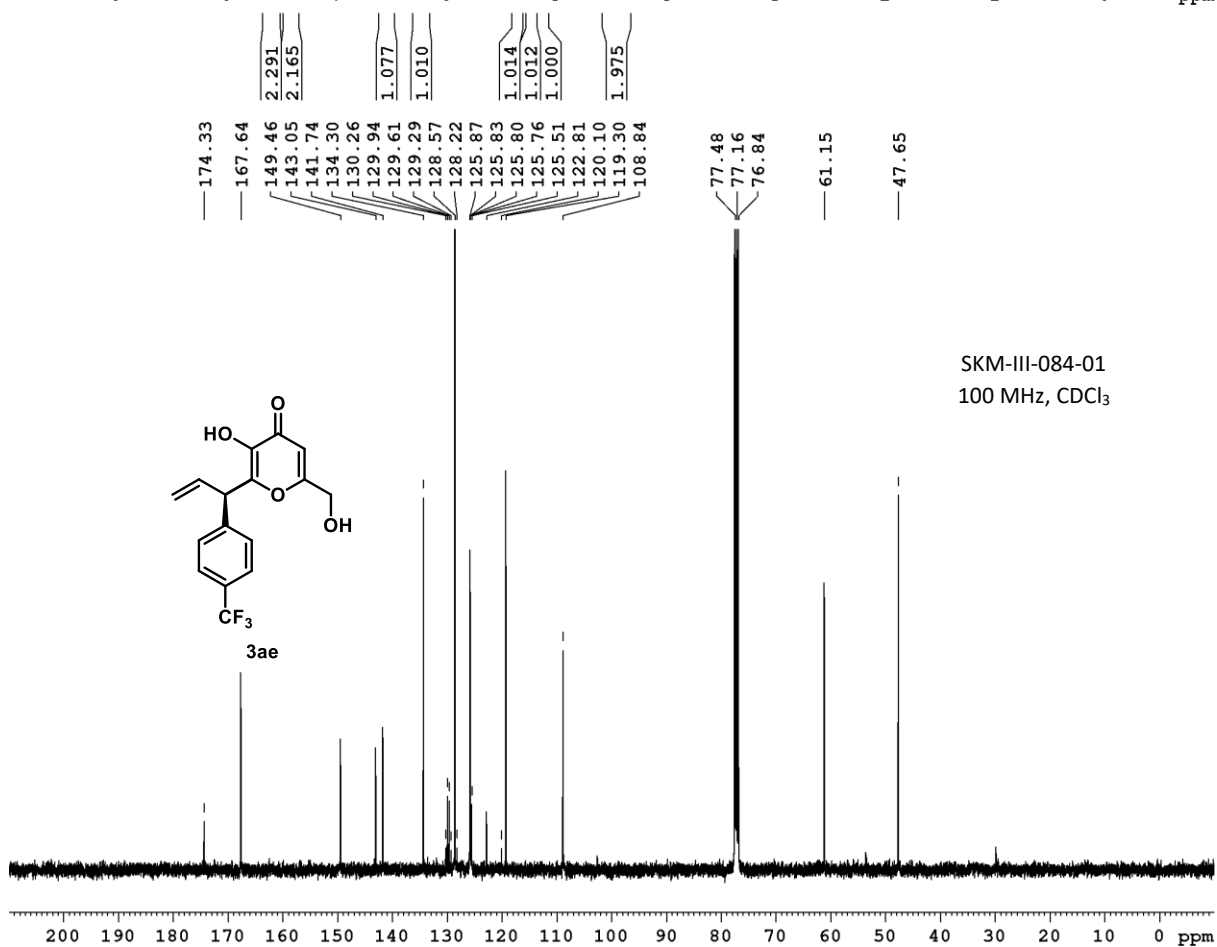

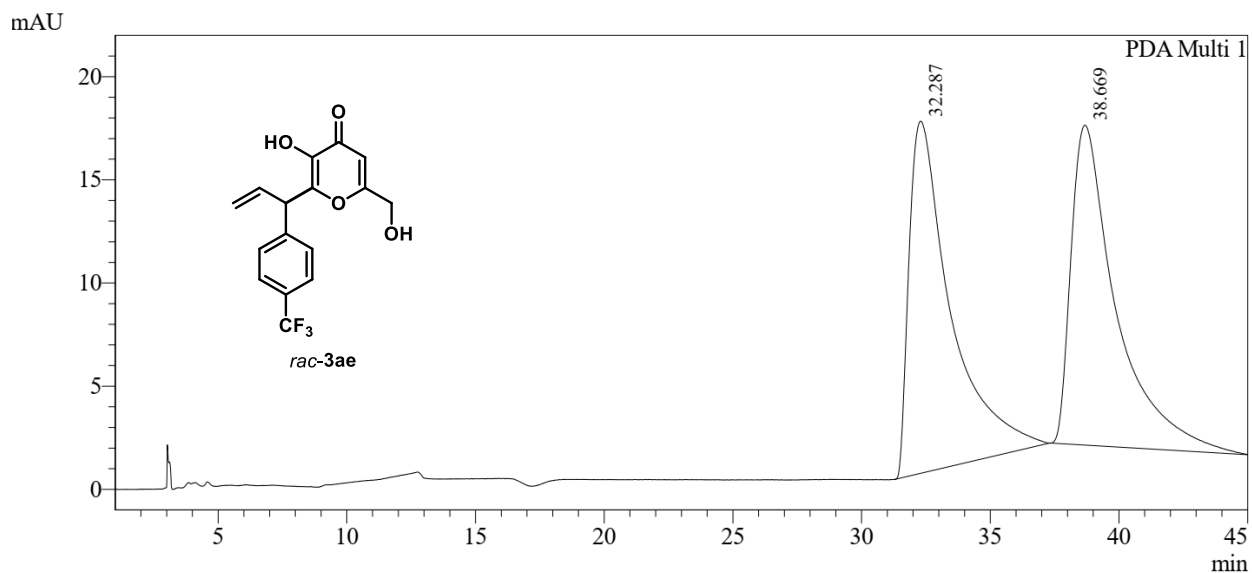

PeakTable

PDA Ch1 275nm 4nm

| Peak# | Ret. Time | Area    | Area %  |
|-------|-----------|---------|---------|
| 1     | 32.287    | 1921425 | 50.558  |
| 2     | 38.669    | 1878982 | 49.442  |
| Total |           | 3800407 | 100.000 |

Daicel Chiralpak AD-H column (95:5 *n*-Hexane/*i*-PrOH, 1.0 mL/min, 20 °C)

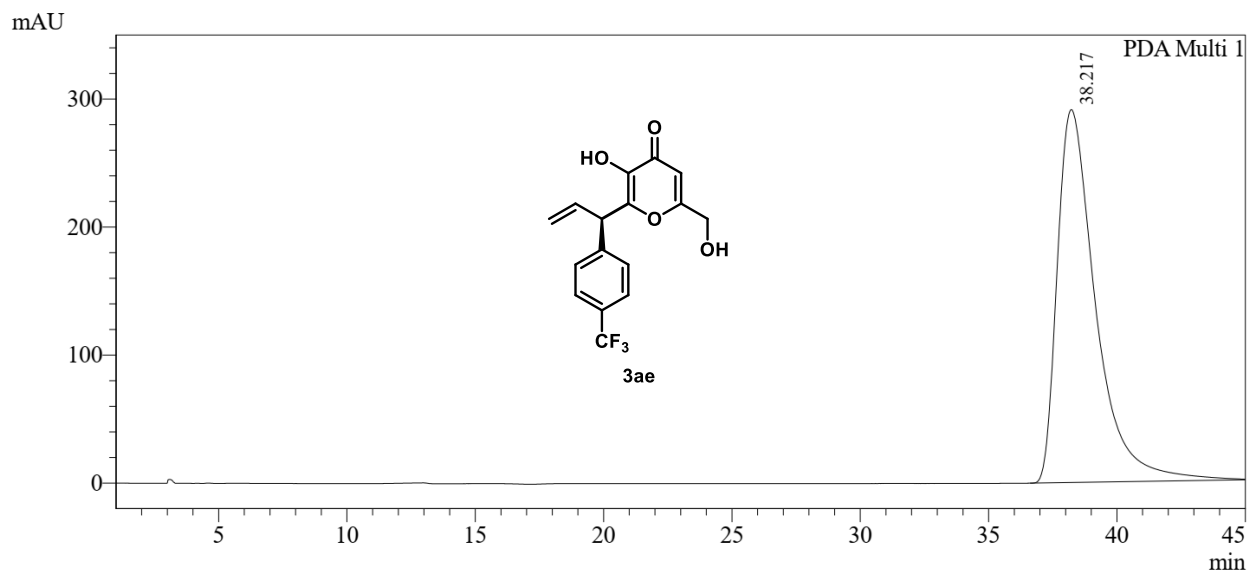

PeakTable

PDA Ch1 275nm 4nm

| Peak# | Ret. Time | Area     | Area %  |
|-------|-----------|----------|---------|
| 1     | 38.217    | 30361885 | 100.000 |
| Total |           | 30361885 | 100.000 |

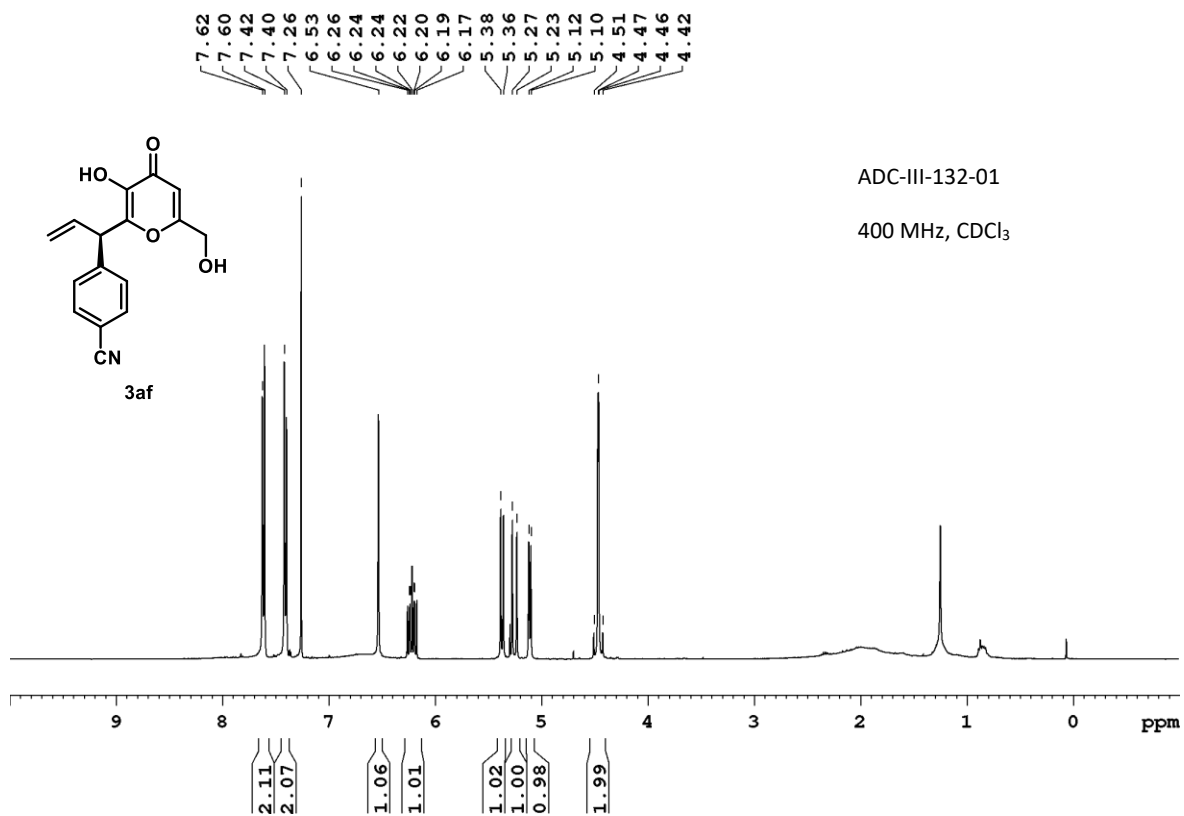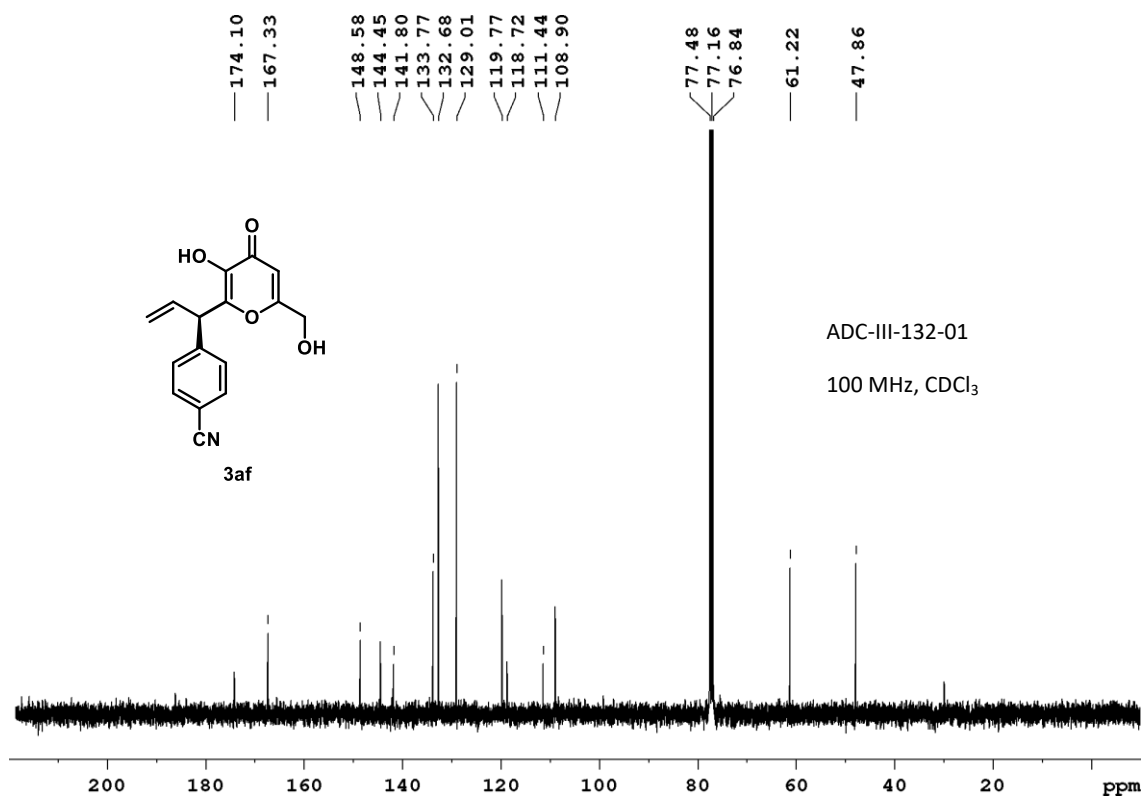

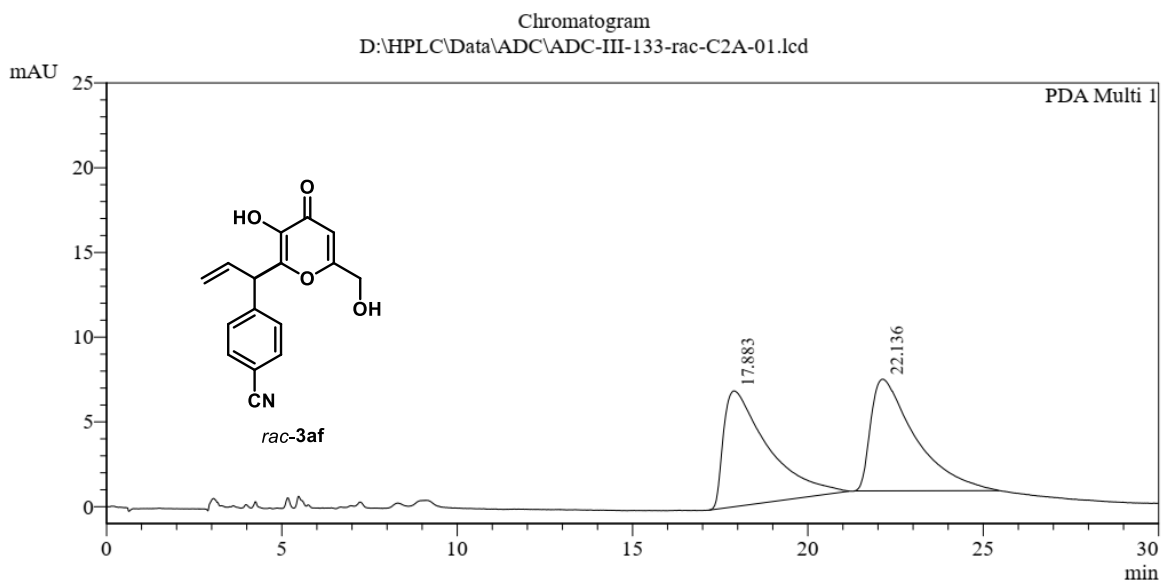

PeakTable  
PDA Ch1 254nm 4nm

| Peak# | Ret. Time | Area    | Area %  |
|-------|-----------|---------|---------|
| 1     | 17.883    | 600801  | 50.724  |
| 2     | 22.136    | 583654  | 49.276  |
| Total |           | 1184455 | 100.000 |

Phenomenex Amylose-2 column (75:25 *n*-Hexane/*i*-PrOH, 1.0 mL/min, 20 °C)

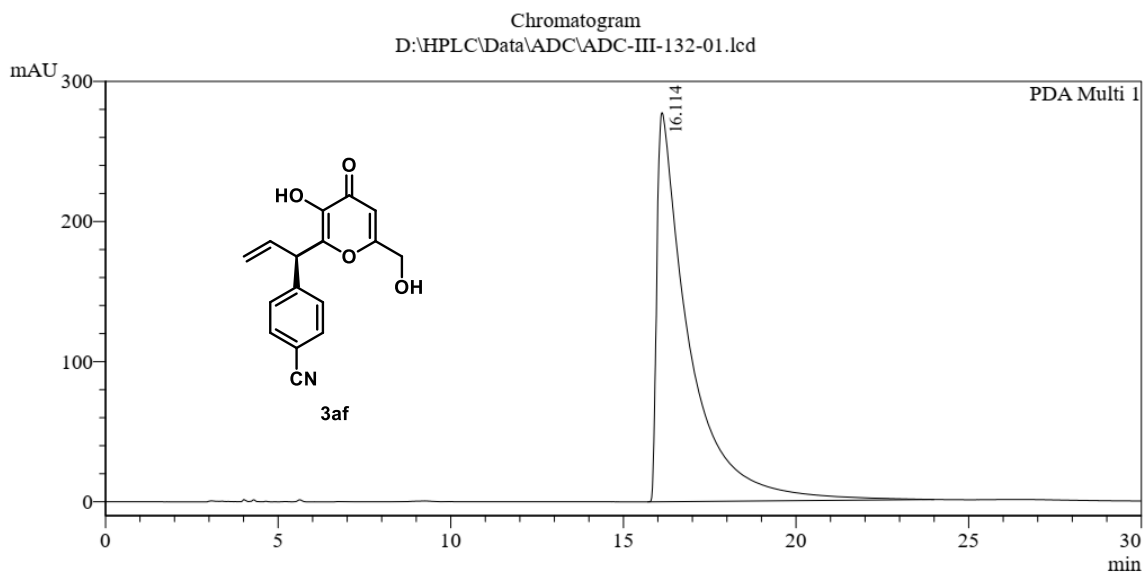

PeakTable  
PDA Ch1 254nm 4nm

| Peak# | Ret. Time | Area     | Area %  |
|-------|-----------|----------|---------|
| 1     | 16.114    | 17964377 | 100.000 |
| Total |           | 17964377 | 100.000 |

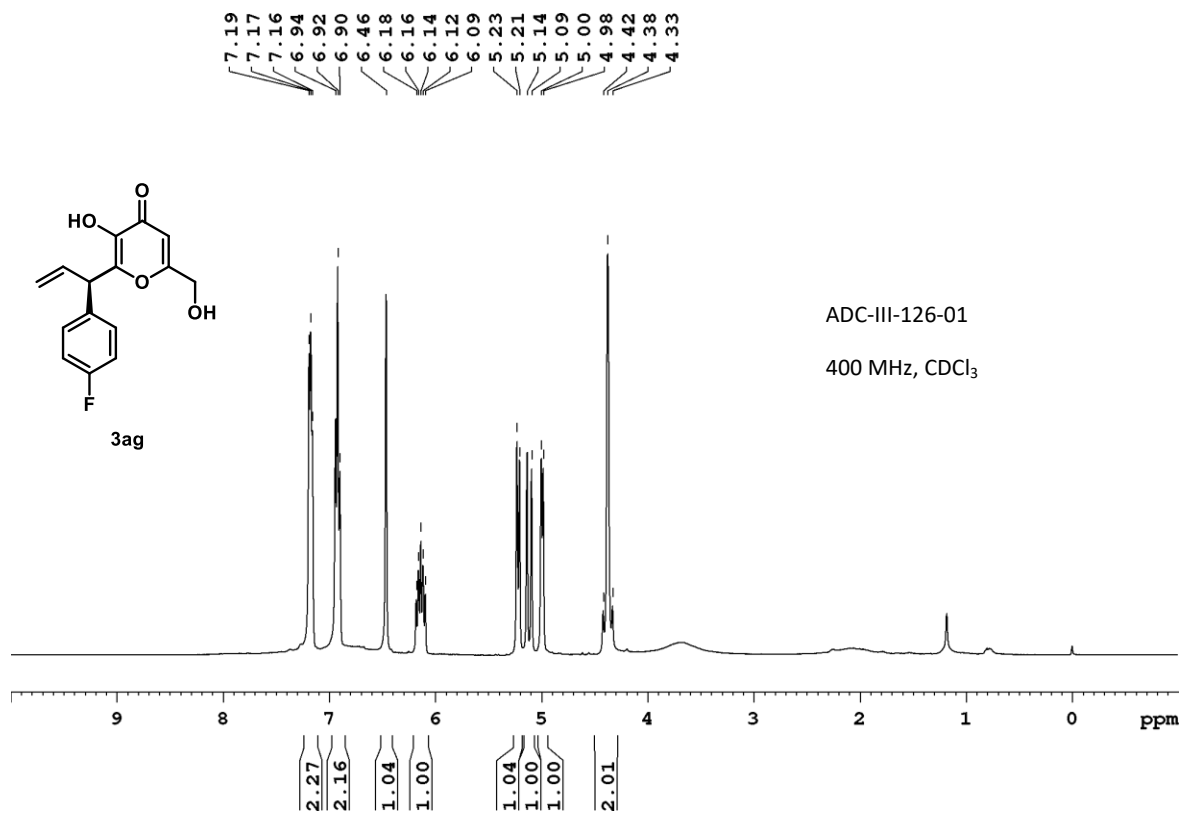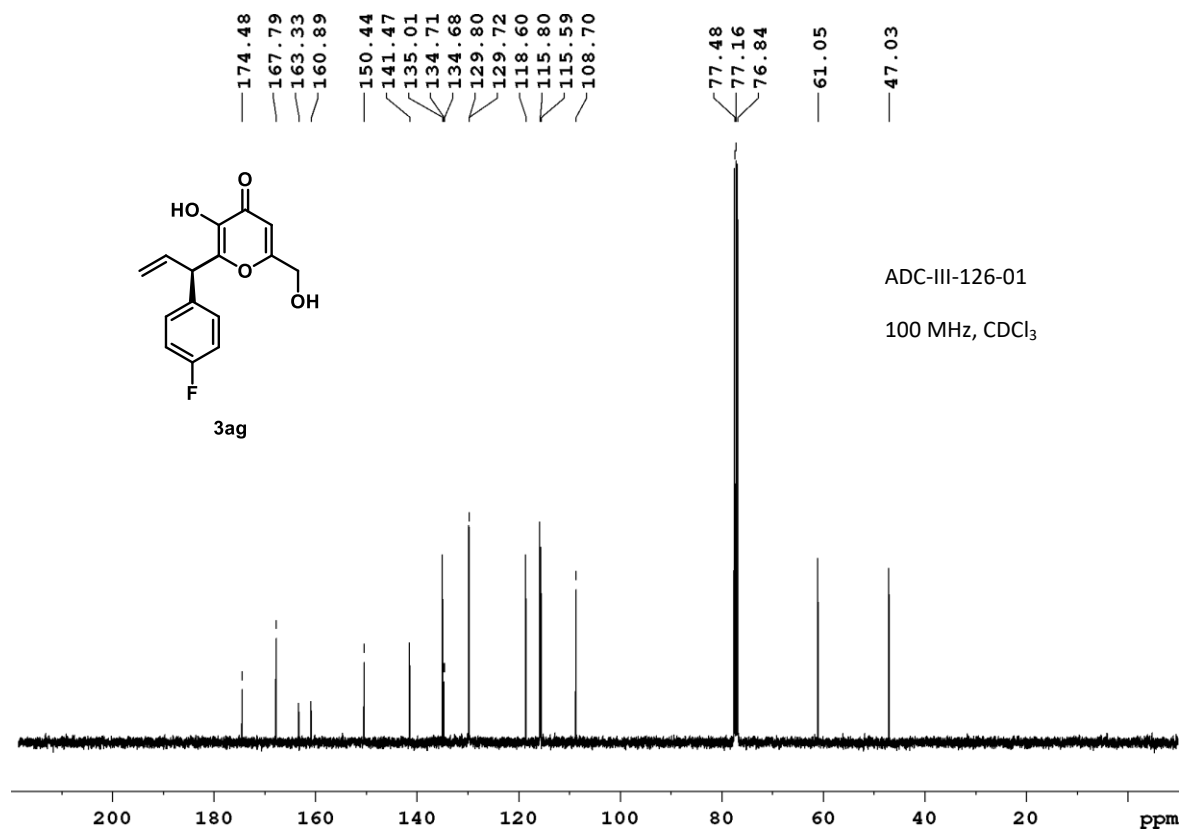

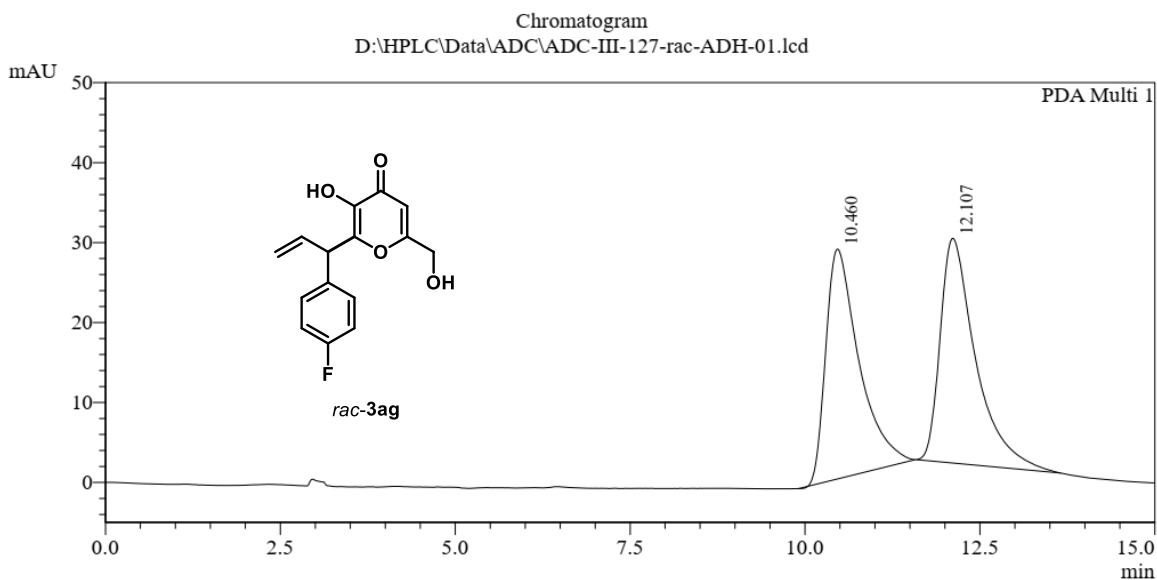

PeakTable  
PDA Ch1 283nm 4nm

| Peak# | Ret. Time | Area    | Area %  |
|-------|-----------|---------|---------|
| 1     | 10.460    | 949262  | 48.929  |
| 2     | 12.107    | 990827  | 51.071  |
| Total |           | 1940089 | 100.000 |

Da

icel Chiralpak AD-H column (85:15 *n*-Hexane/*i*-PrOH, 1.0 mL/min, 20 °C)

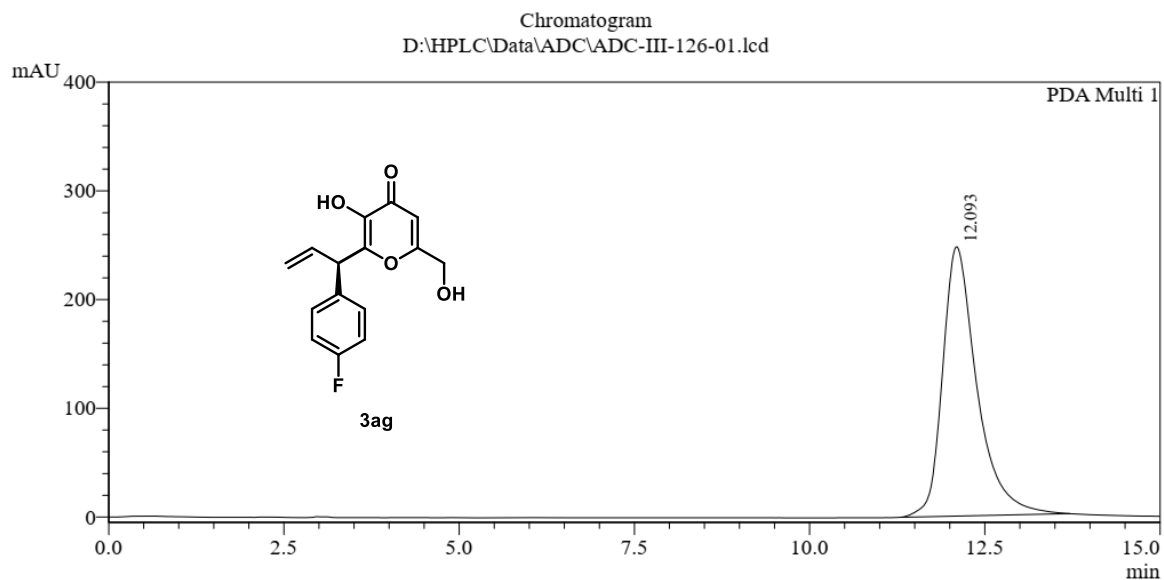

PeakTable  
PDA Ch1 283nm 4nm

| Peak# | Ret. Time | Area    | Area %  |
|-------|-----------|---------|---------|
| 1     | 12.093    | 8457622 | 100.000 |
| Total |           | 8457622 | 100.000 |



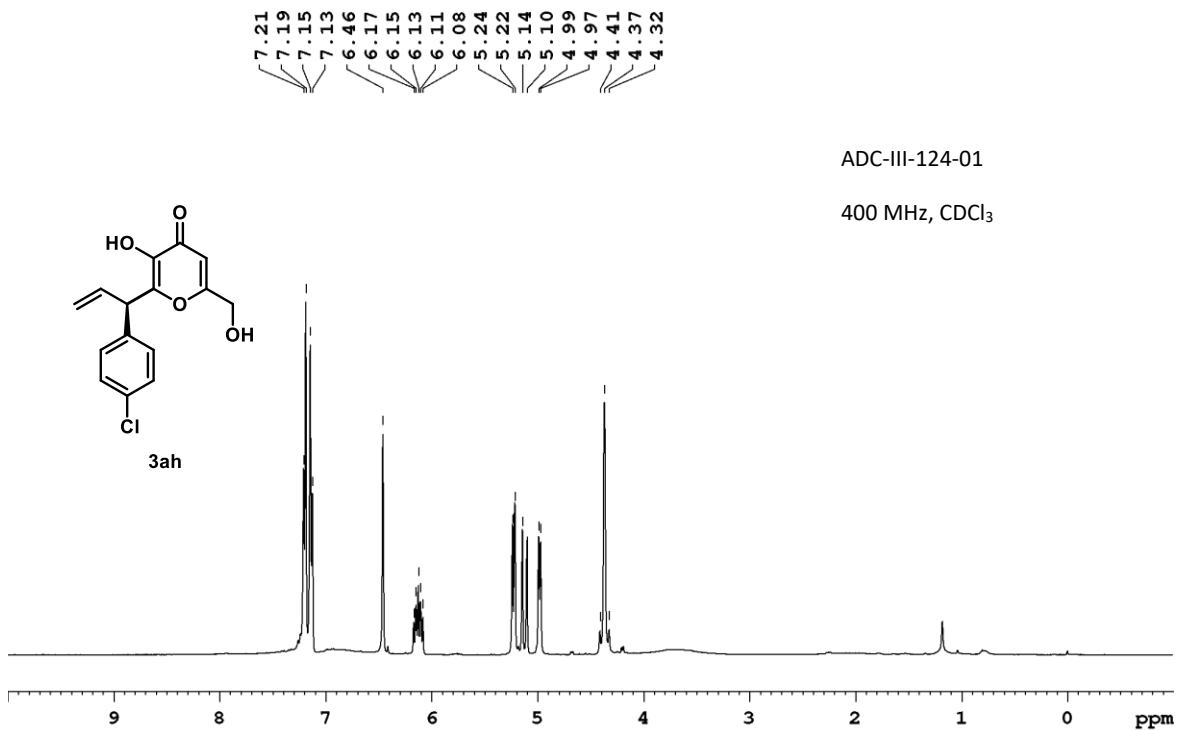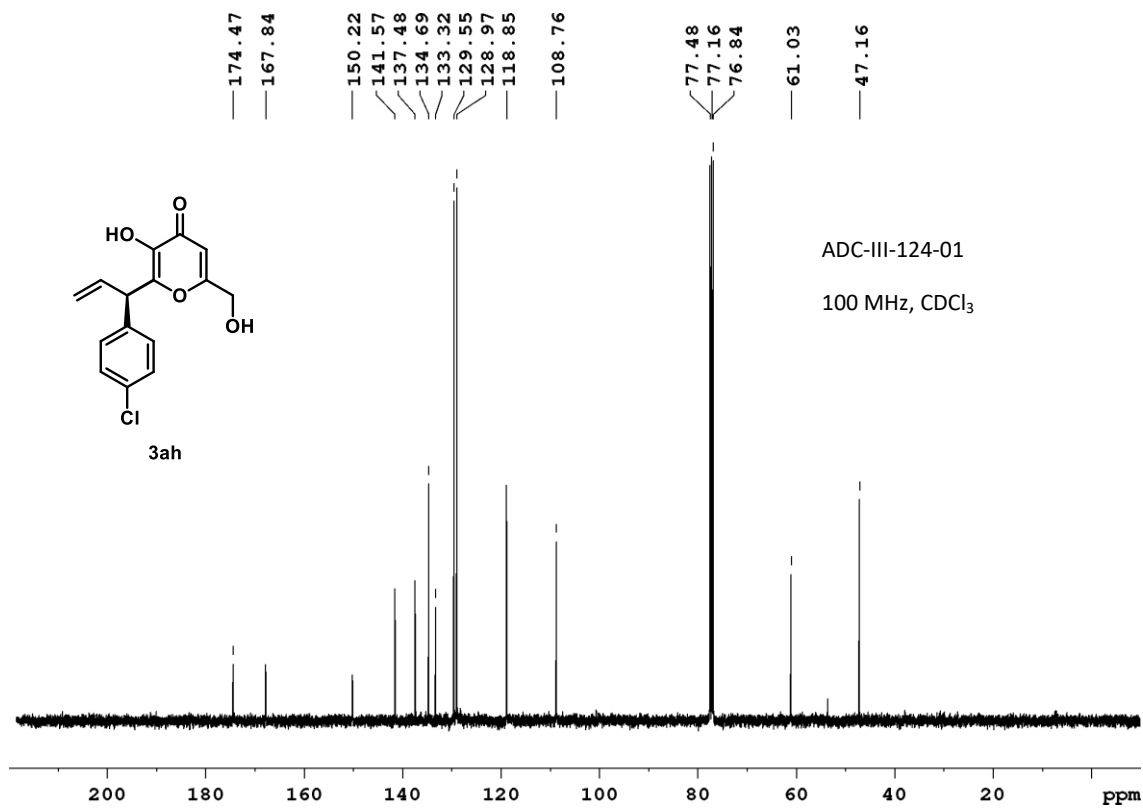

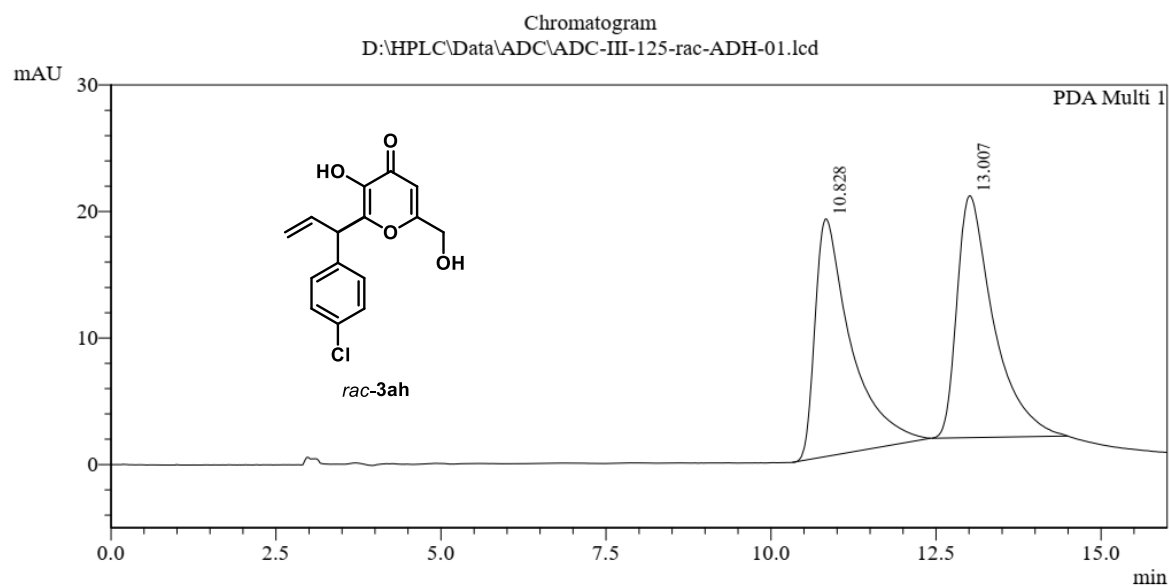

PeakTable

PDA Ch1 282nm 4nm

| Peak# | Ret. Time | Area    | Area %  |
|-------|-----------|---------|---------|
| 1     | 10.828    | 710118  | 49.015  |
| 2     | 13.007    | 738662  | 50.985  |
| Total |           | 1448780 | 100.000 |

Daicel Chiralpak AD-H column (85:15 *n*-Hexane/*i*-PrOH, 1.0 mL/min, 20 °C)

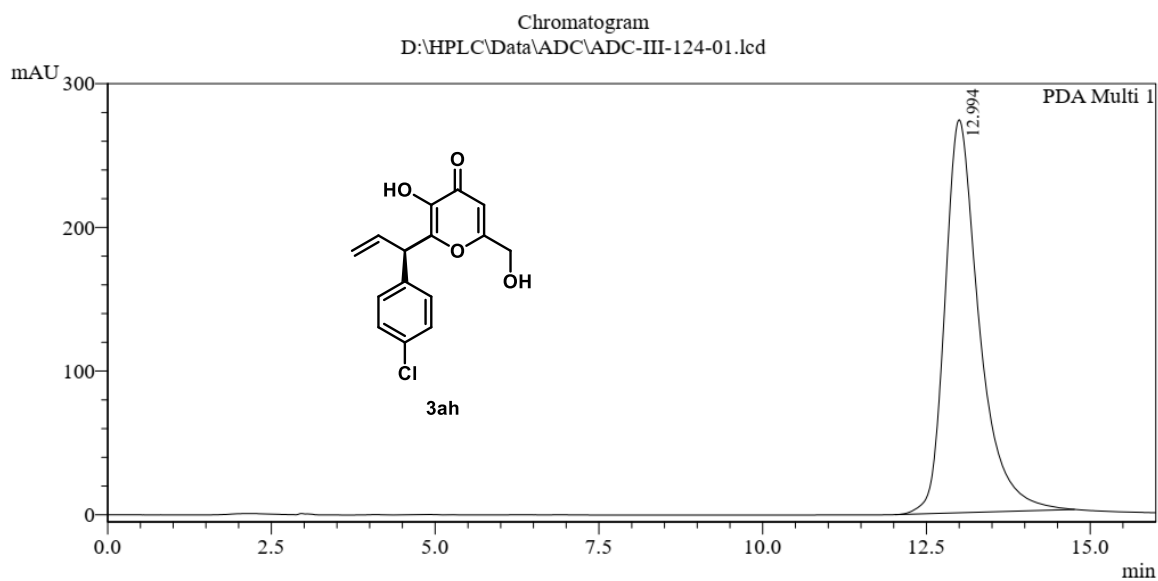

PeakTable

PDA Ch1 282nm 4nm

| Peak# | Ret. Time | Area    | Area %  |
|-------|-----------|---------|---------|
| 1     | 12.994    | 9983031 | 100.000 |
| Total |           | 9983031 | 100.000 |

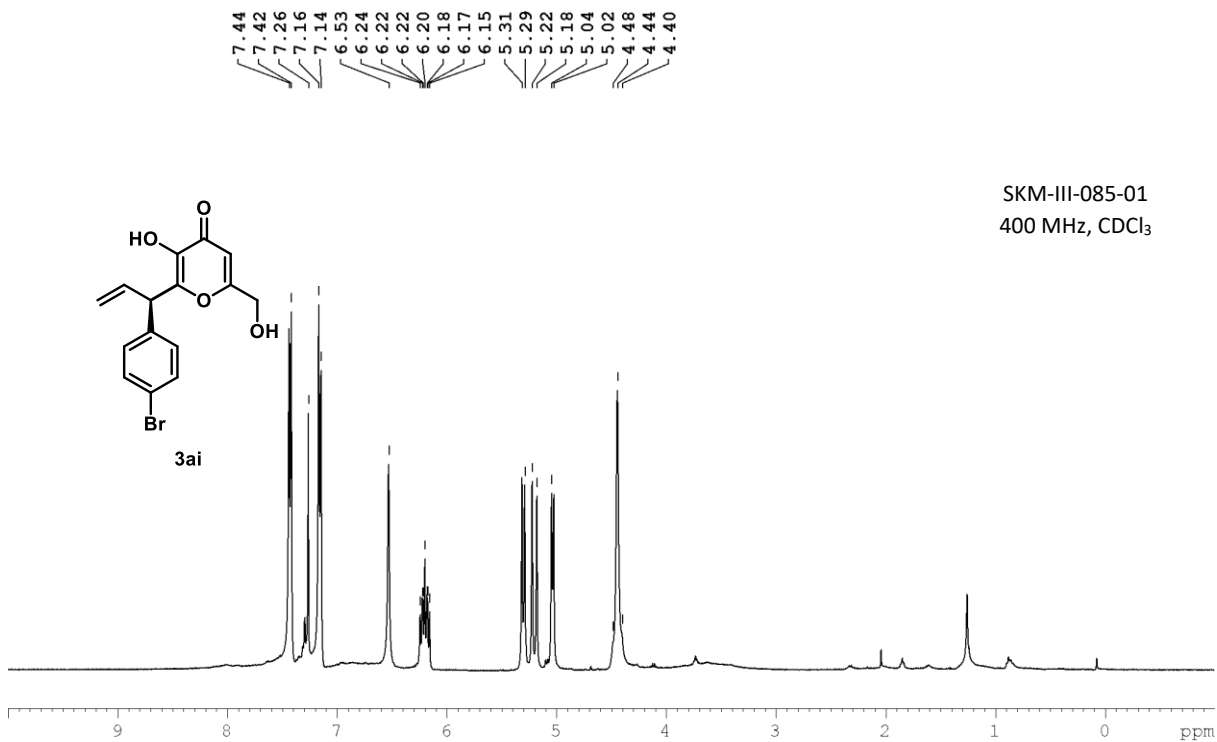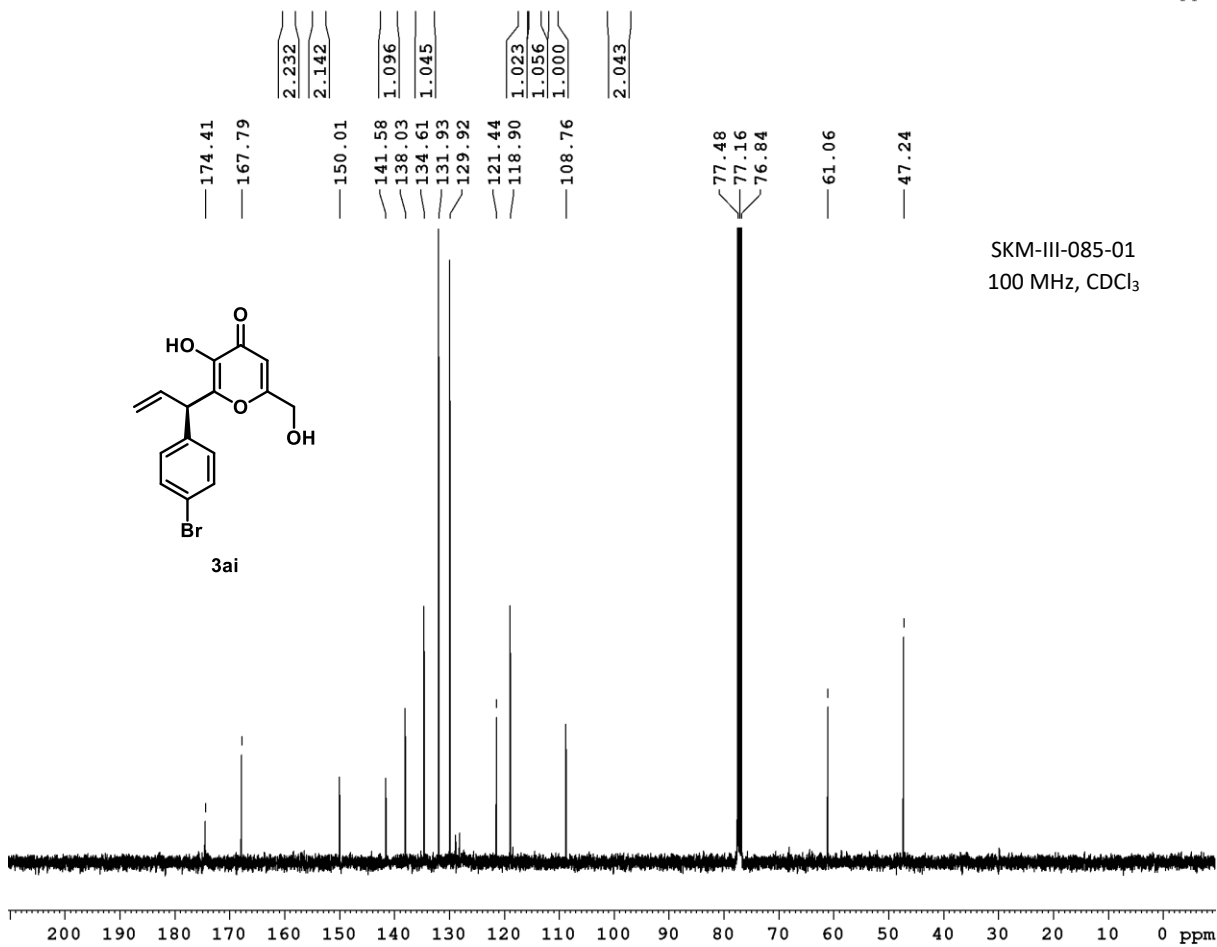

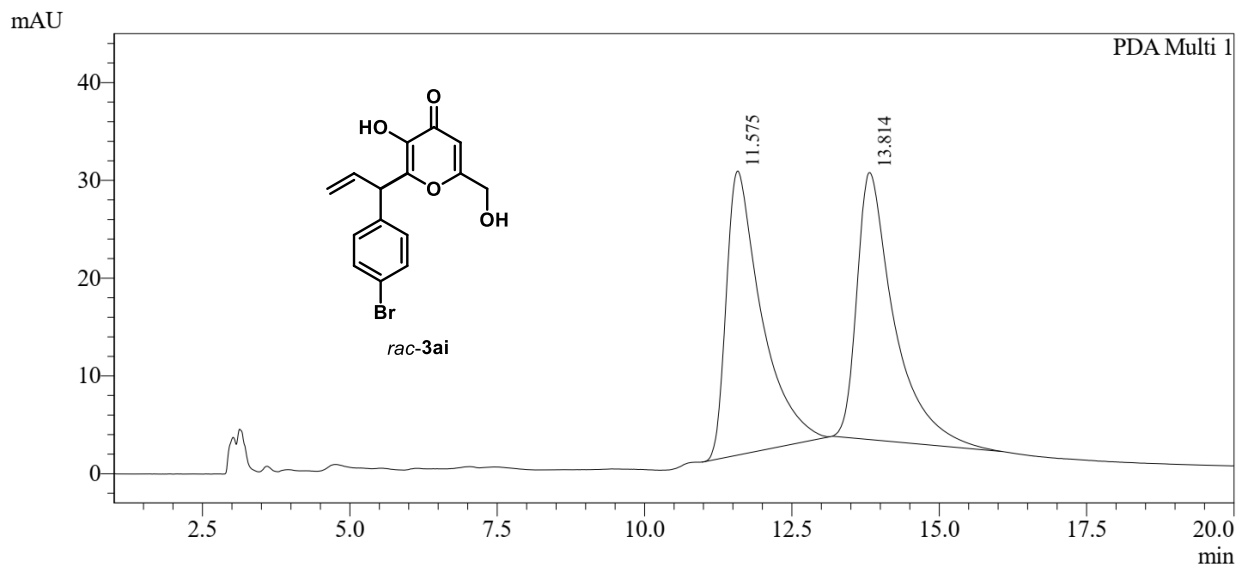

PeakTable

PDA Ch1 222nm 4nm

| Peak# | Ret. Time | Area    | Area %  |
|-------|-----------|---------|---------|
| 1     | 11.575    | 1208357 | 50.125  |
| 2     | 13.814    | 1202307 | 49.875  |
| Total |           | 2410664 | 100.000 |

Daicel Chiralpak AD-H column (85:15 *n*-Hexane/*i*-PrOH, 1.0 mL/min, 20 °C)

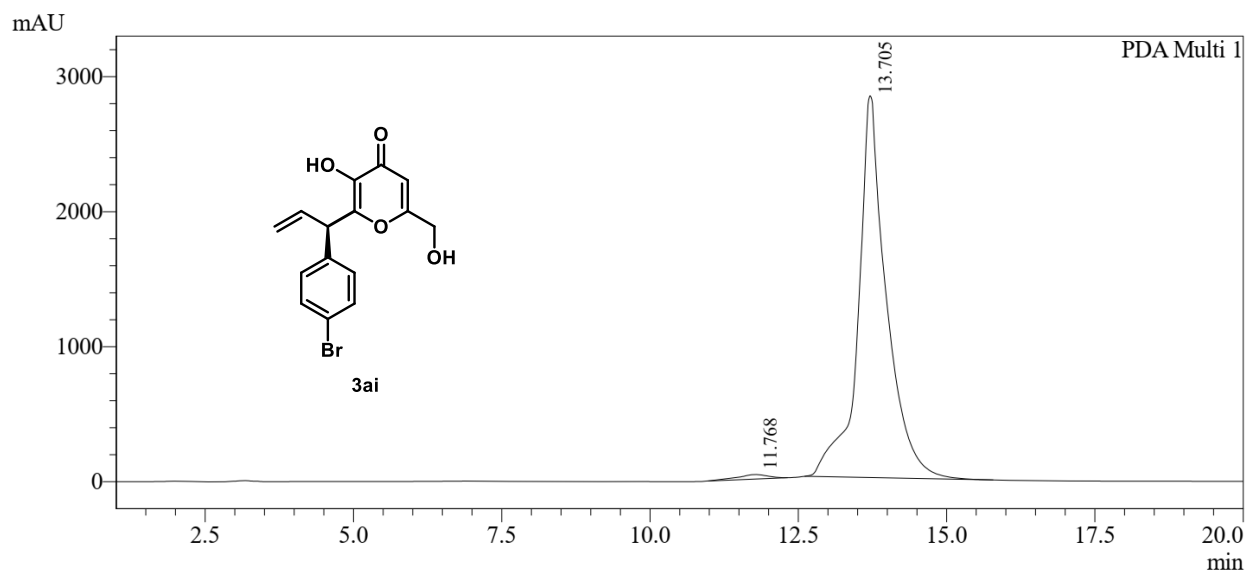

PeakTable

PDA Ch1 222nm 4nm

| Peak# | Ret. Time | Area     | Area %  |
|-------|-----------|----------|---------|
| 1     | 11.768    | 1242475  | 1.301   |
| 2     | 13.705    | 94281879 | 98.699  |
| Total |           | 95524354 | 100.000 |

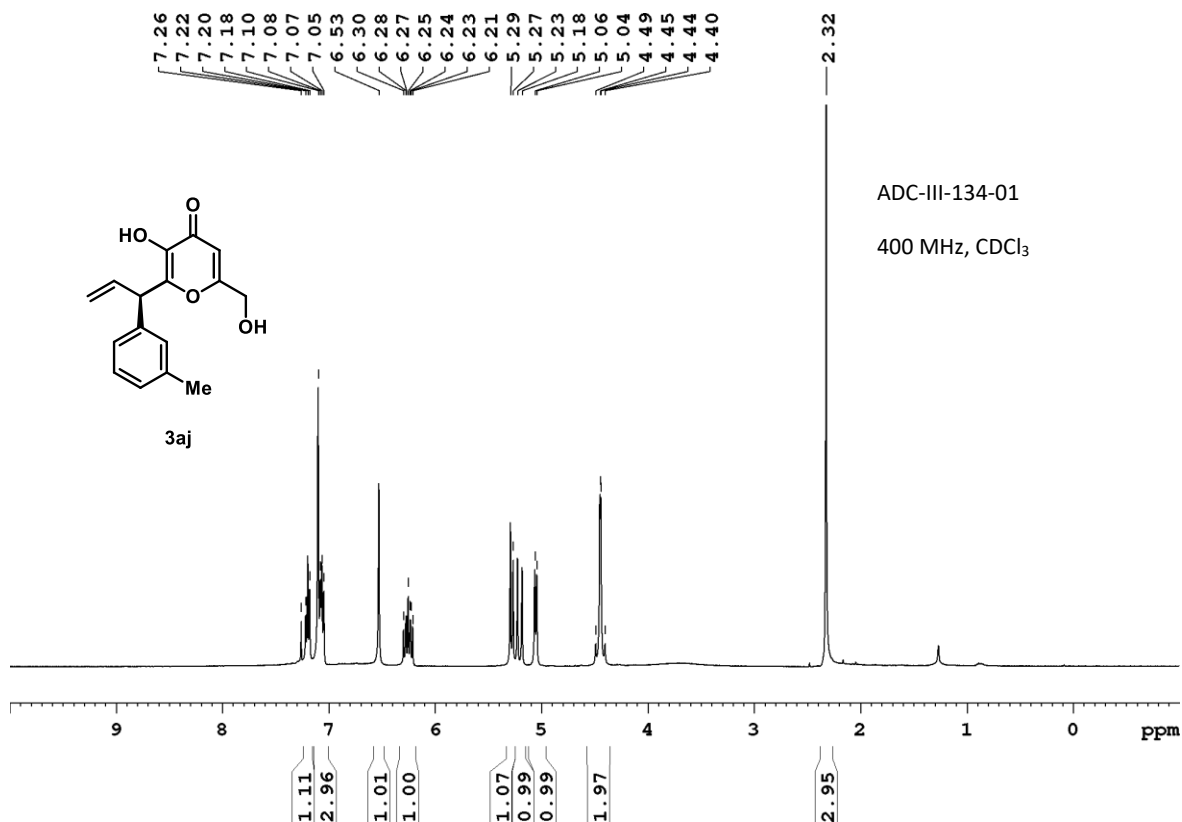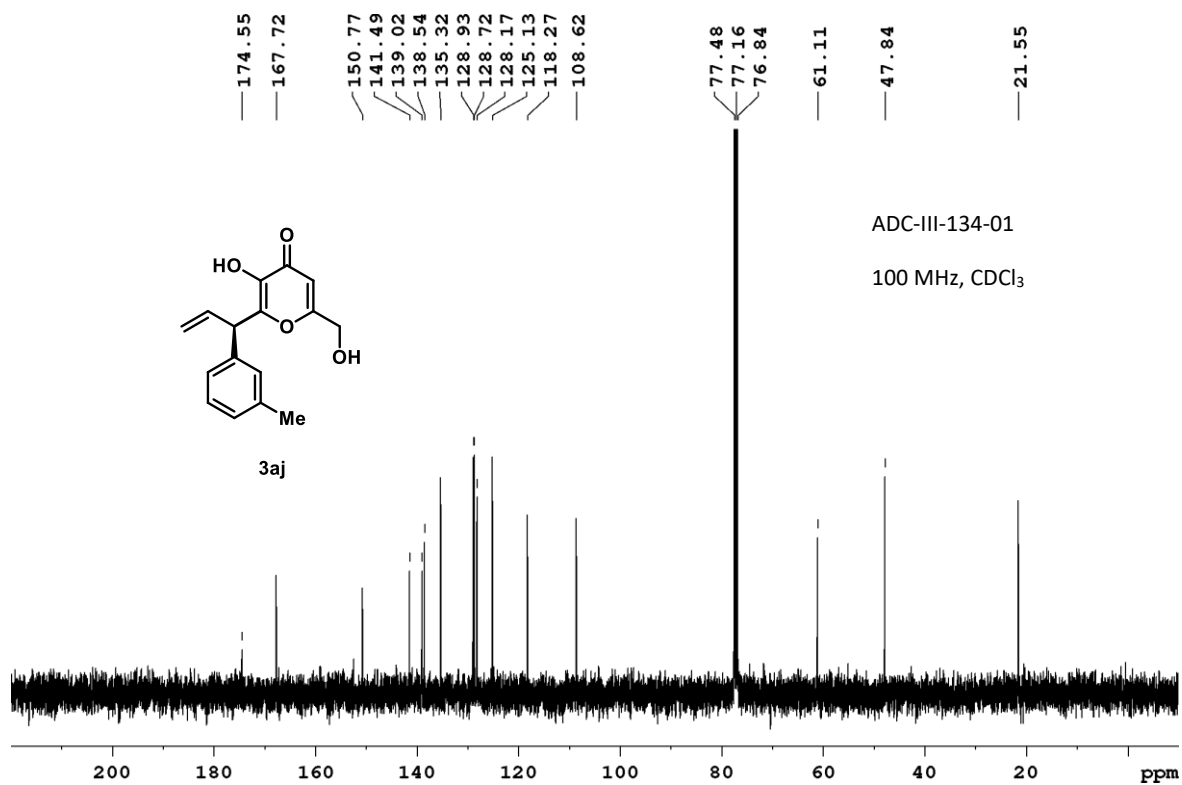

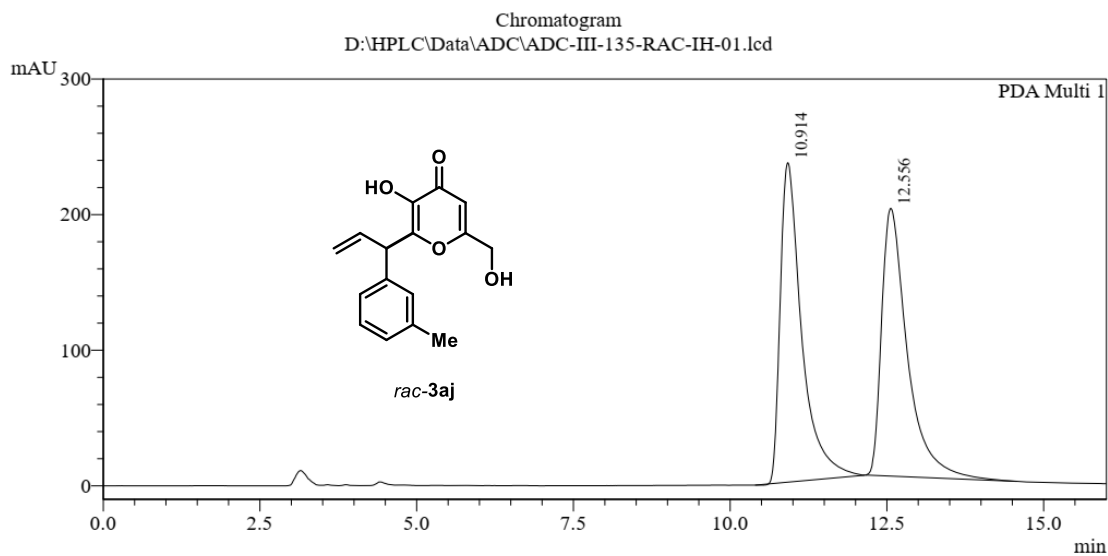

PeakTable

PDA Ch1 215nm 4nm

| Peak# | Ret. Time | Area     | Area %  |
|-------|-----------|----------|---------|
| 1     | 10.914    | 5618243  | 49.850  |
| 2     | 12.556    | 5652037  | 50.150  |
| Total |           | 11270280 | 100.000 |

Daicel Chiralpak IH column (85:15 *n*-Hexane/*i*-PrOH, 1.0 mL/min, 20 °C)

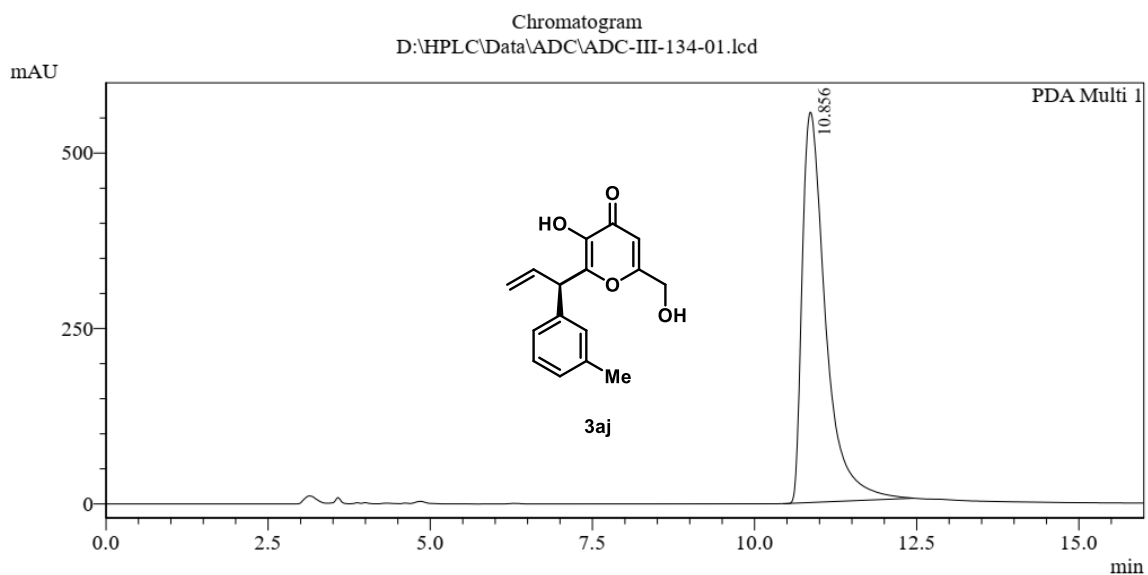

PeakTable

PDA Ch1 215nm 4nm

| Peak# | Ret. Time | Area     | Area %  |
|-------|-----------|----------|---------|
| 1     | 10.856    | 14000208 | 100.000 |
| Total |           | 14000208 | 100.000 |

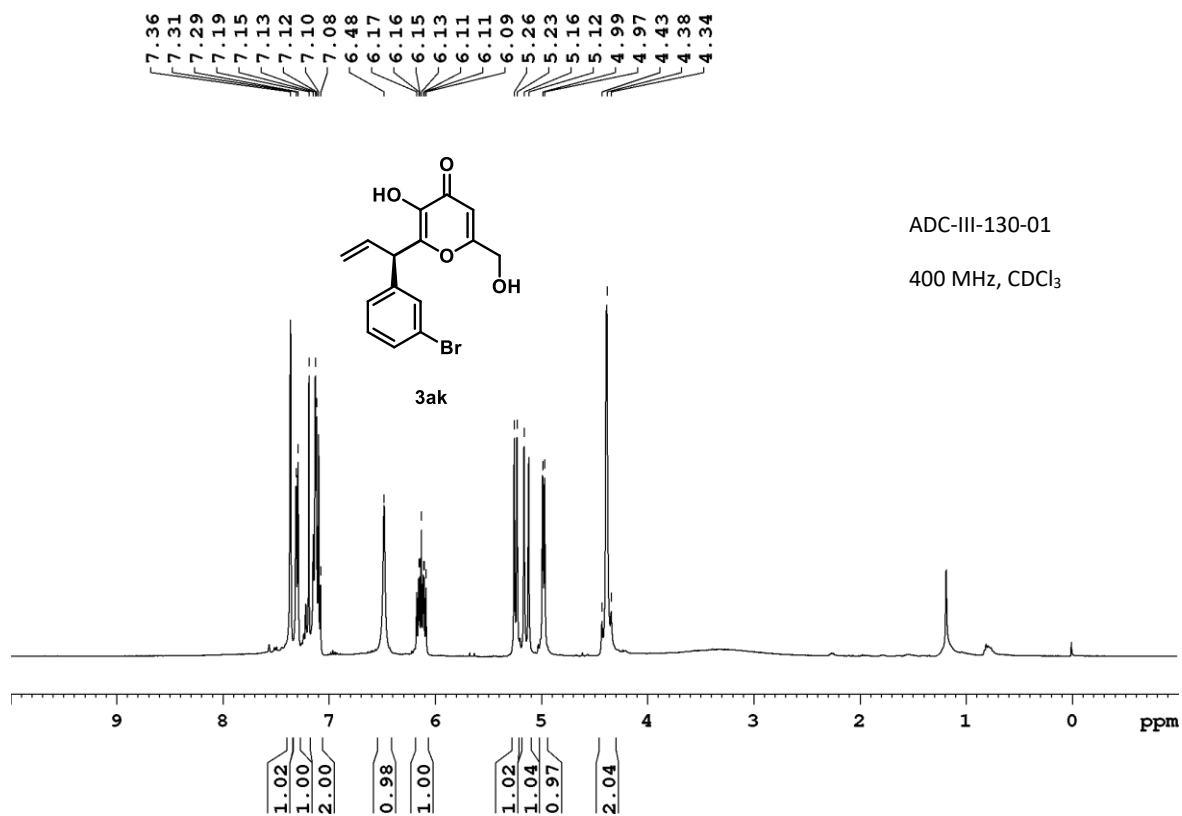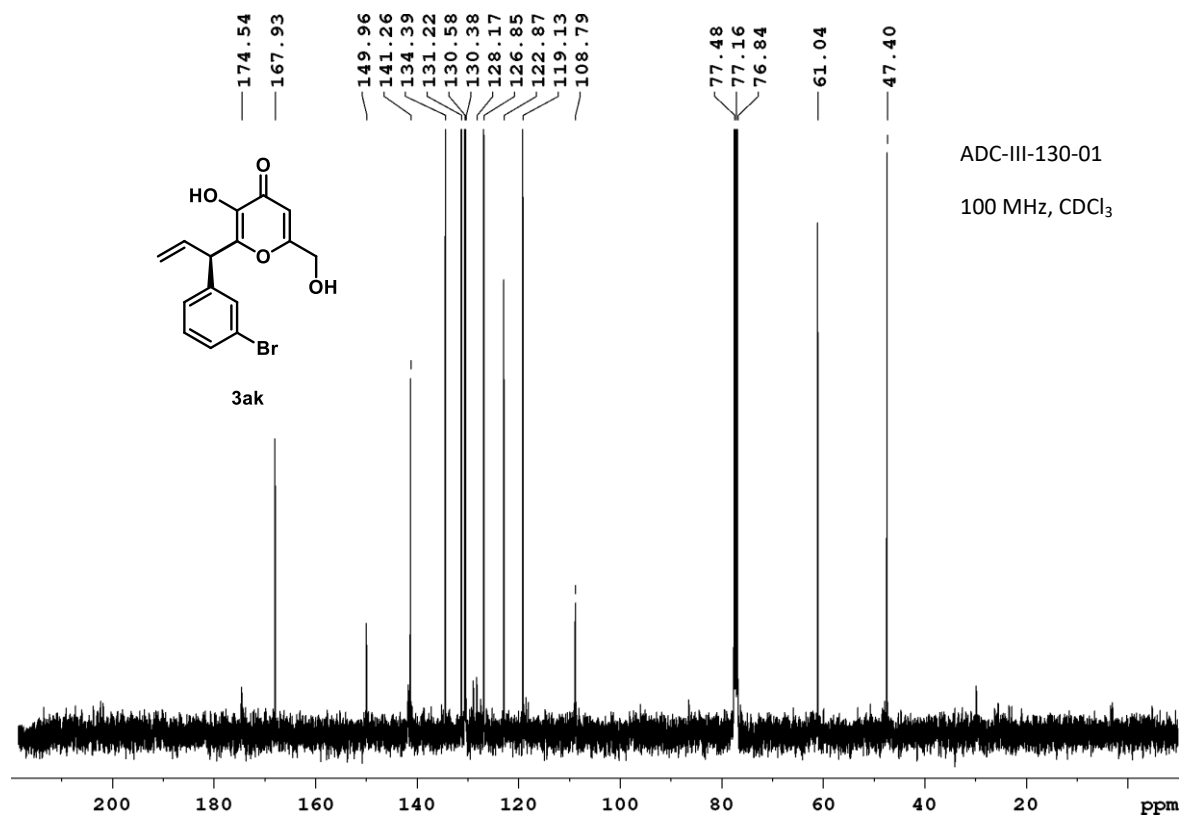

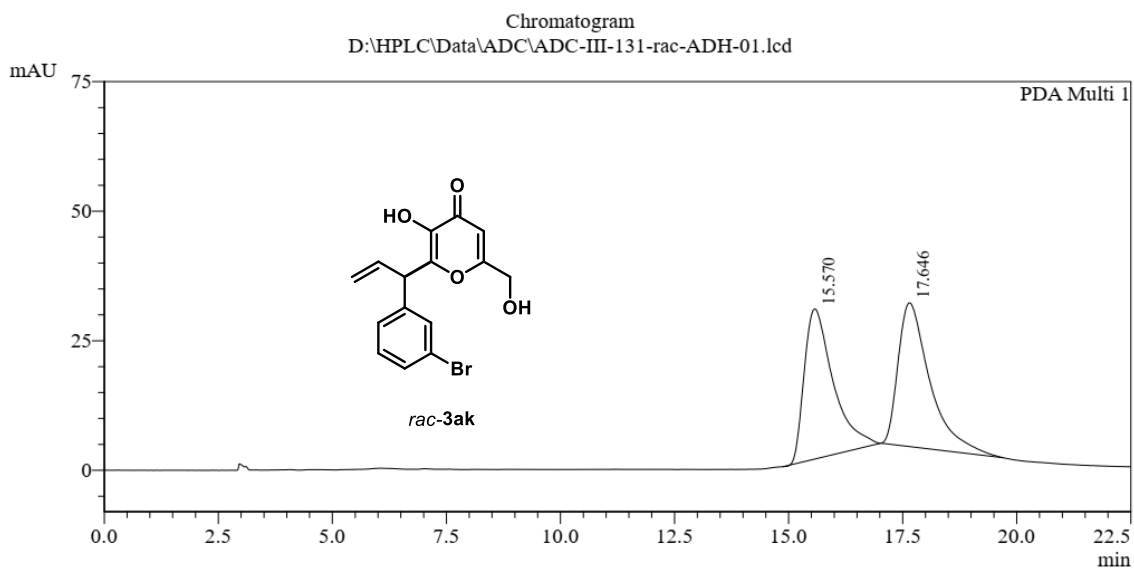

PeakTable

PDA Ch1 276nm 4nm

| Peak# | Ret. Time | Area    | Area %  |
|-------|-----------|---------|---------|
| 1     | 15.570    | 1280722 | 48.752  |
| 2     | 17.646    | 1346295 | 51.248  |
| Total |           | 2627017 | 100.000 |

Daicel Chiralpak AD-H column (90:10 *n*-Hexane/*i*-PrOH, 1.0 mL/min, 20 °C)

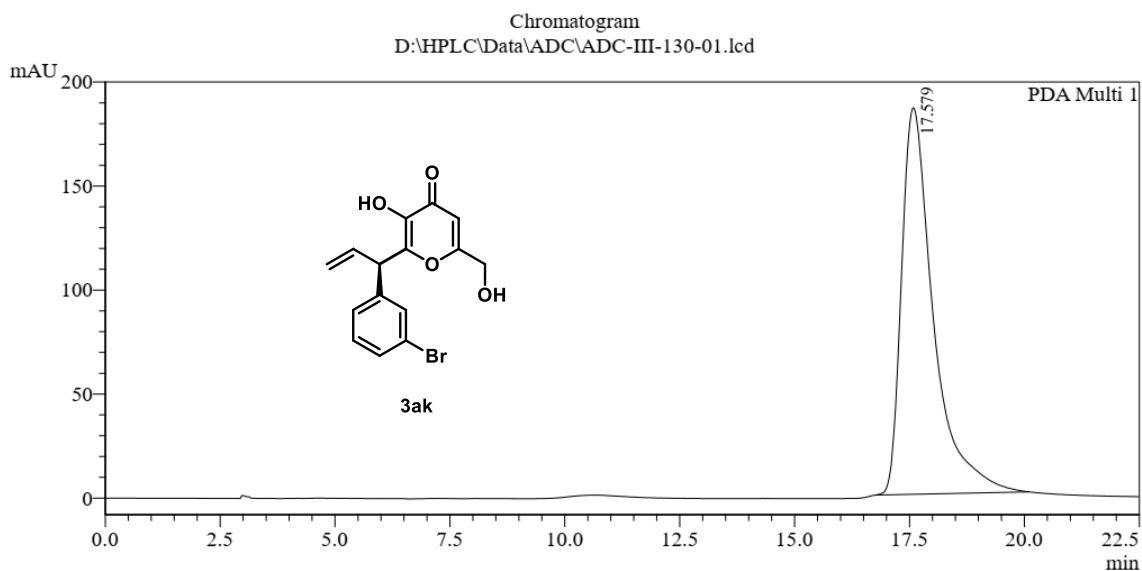

PeakTable

PDA Ch1 276nm 4nm

| Peak# | Ret. Time | Area    | Area %  |
|-------|-----------|---------|---------|
| 1     | 17.579    | 8950689 | 100.000 |
| Total |           | 8950689 | 100.000 |



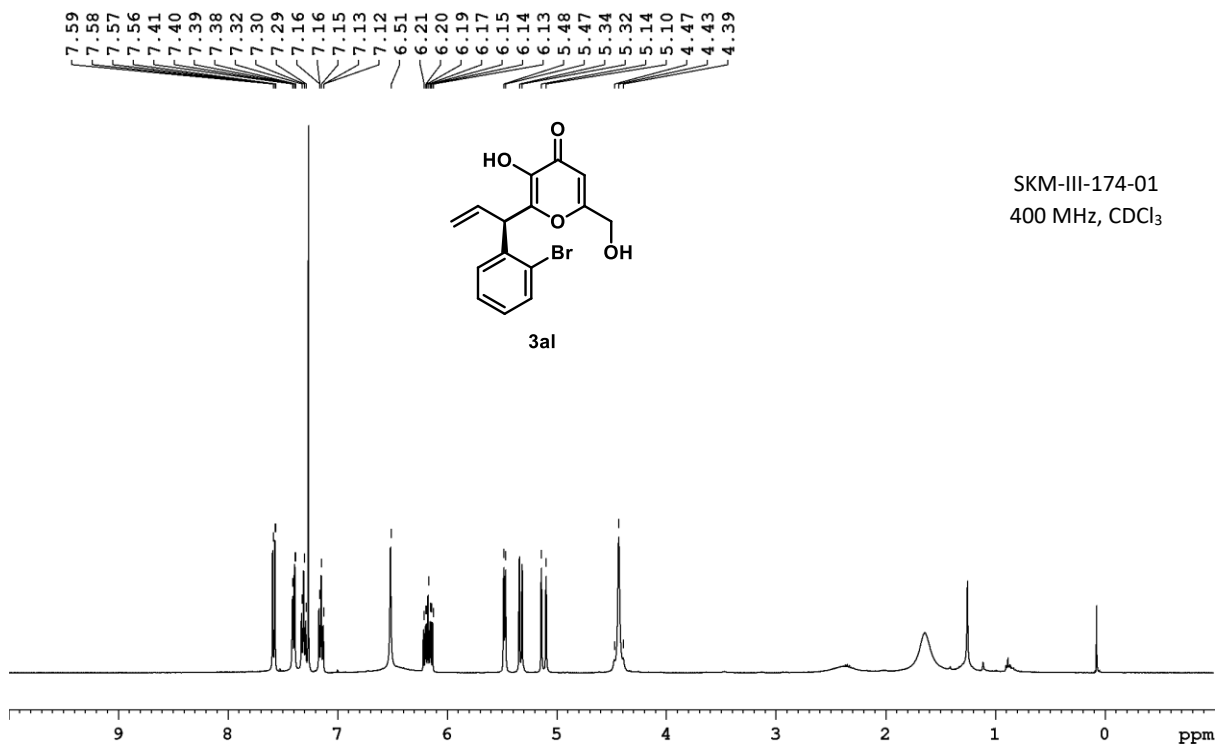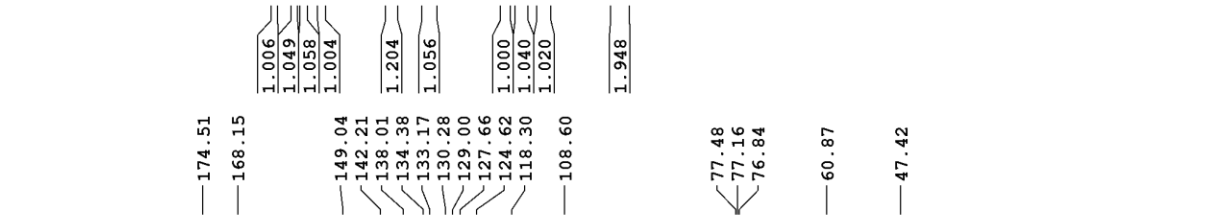

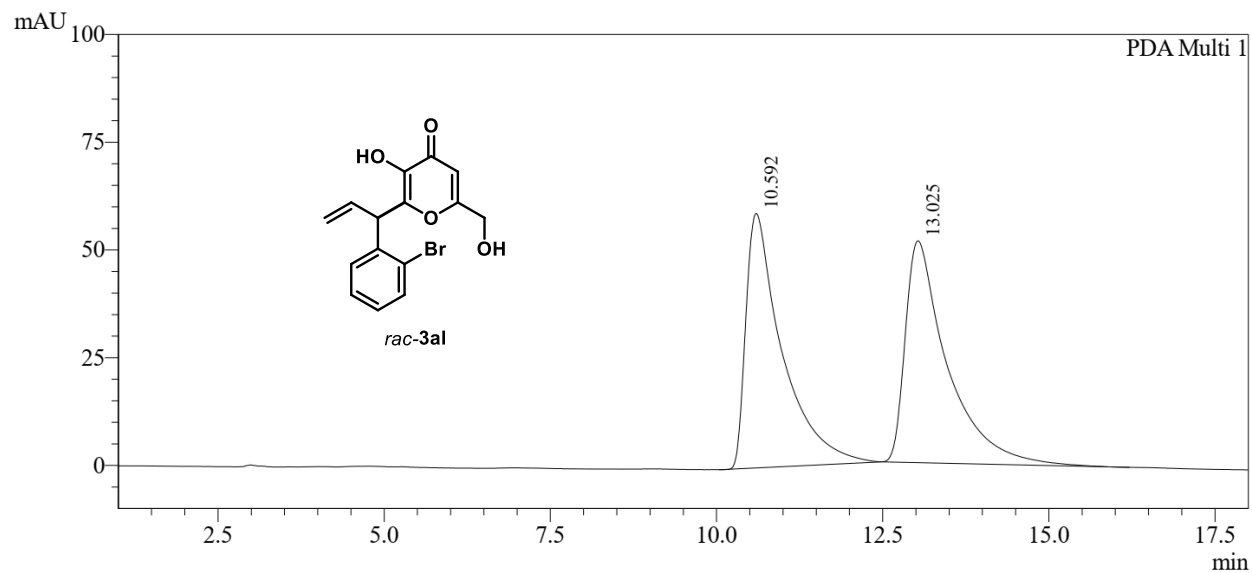

PeakTable

PDA Ch1 280nm 4nm

| Peak# | Ret. Time | Area    | Area %  |
|-------|-----------|---------|---------|
| 1     | 10.592    | 2237312 | 49.770  |
| 2     | 13.025    | 2257984 | 50.230  |
| Total |           | 4495297 | 100.000 |

Daicel Chiralpak AD-H column (85:15 *n*-Hexane/*i*-PrOH, 1.0 mL/min, 20 °C)

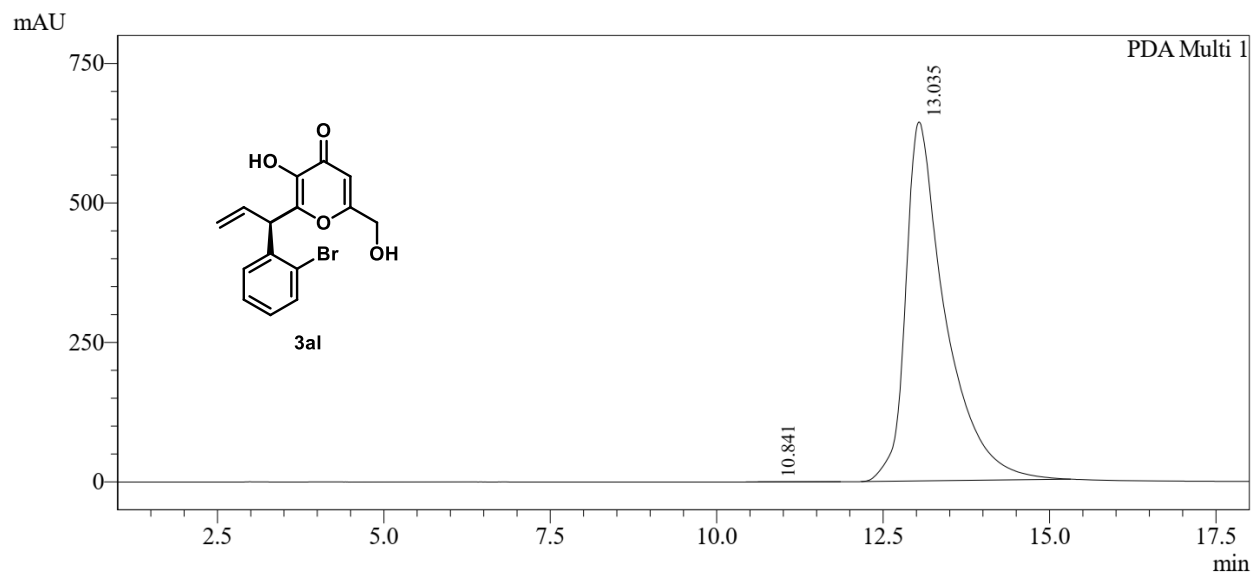

PeakTable

PDA Ch1 280nm 4nm

| Peak# | Ret. Time | Area     | Area %  |
|-------|-----------|----------|---------|
| 1     | 10.841    | 20520    | 0.076   |
| 2     | 13.035    | 26844750 | 99.924  |
| Total |           | 26865270 | 100.000 |

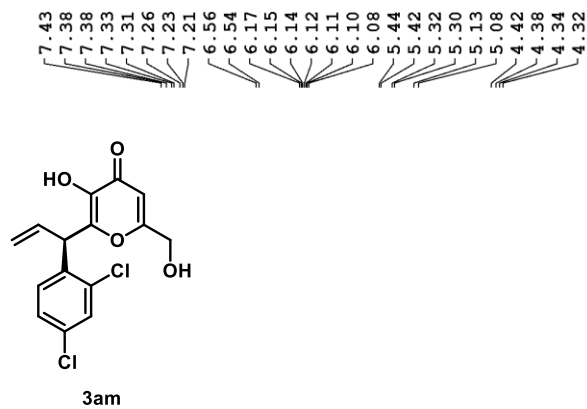

SKM-III-155-02  
400 MHz, CDCl<sub>3</sub>

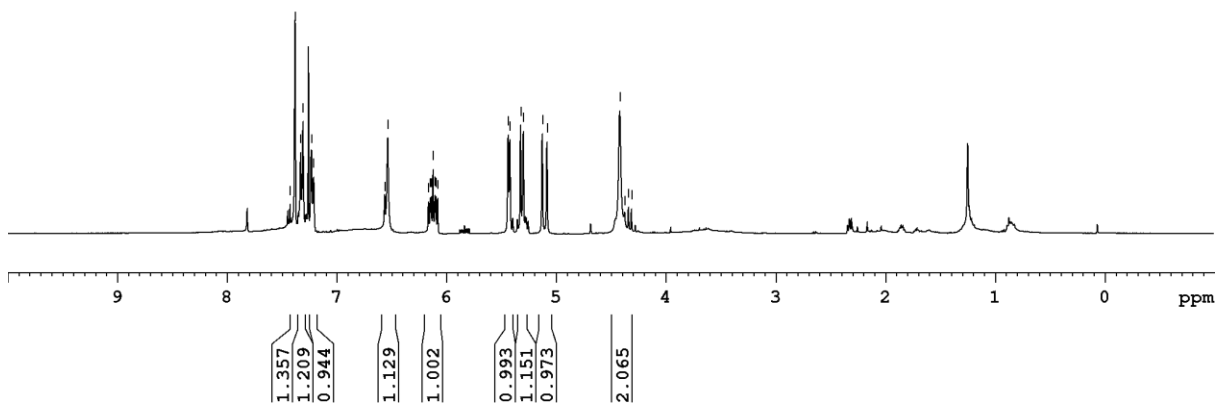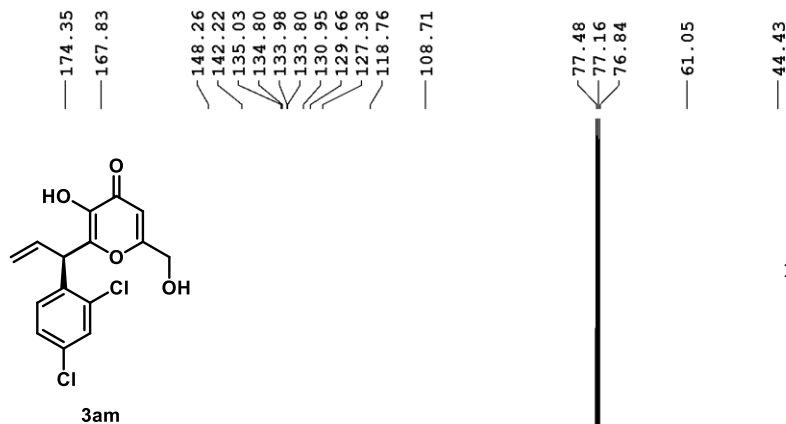

SKM-III-155-02  
100 MHz, CDCl<sub>3</sub>

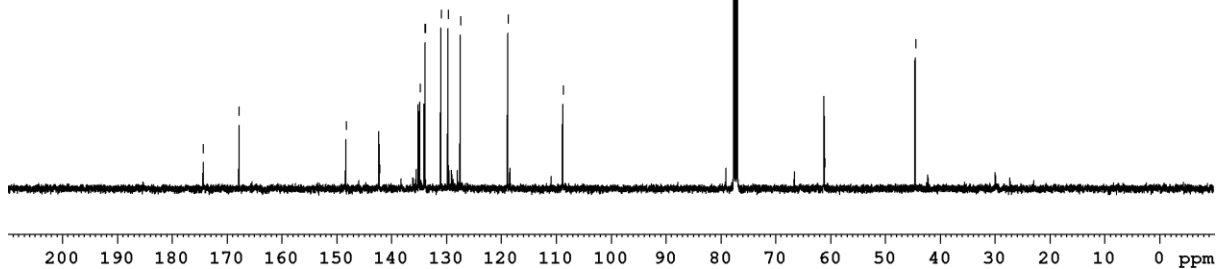

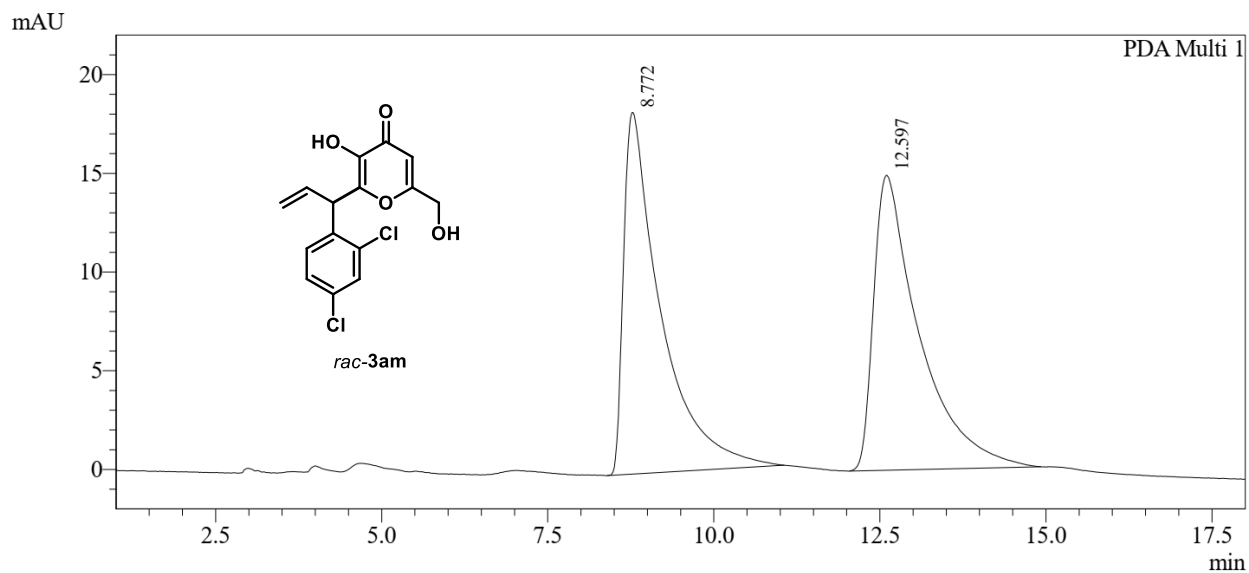

PeakTable

PDA Ch1 288nm 4nm

| Peak# | Ret. Time | Area    | Area %  |
|-------|-----------|---------|---------|
| 1     | 8.772     | 713810  | 50.023  |
| 2     | 12.597    | 713143  | 49.977  |
| Total |           | 1426953 | 100.000 |

Daicel Chiralpak AD-H column (85:15 *n*-Hexane/*i*-PrOH, 1.0 mL/min, 20 °C)

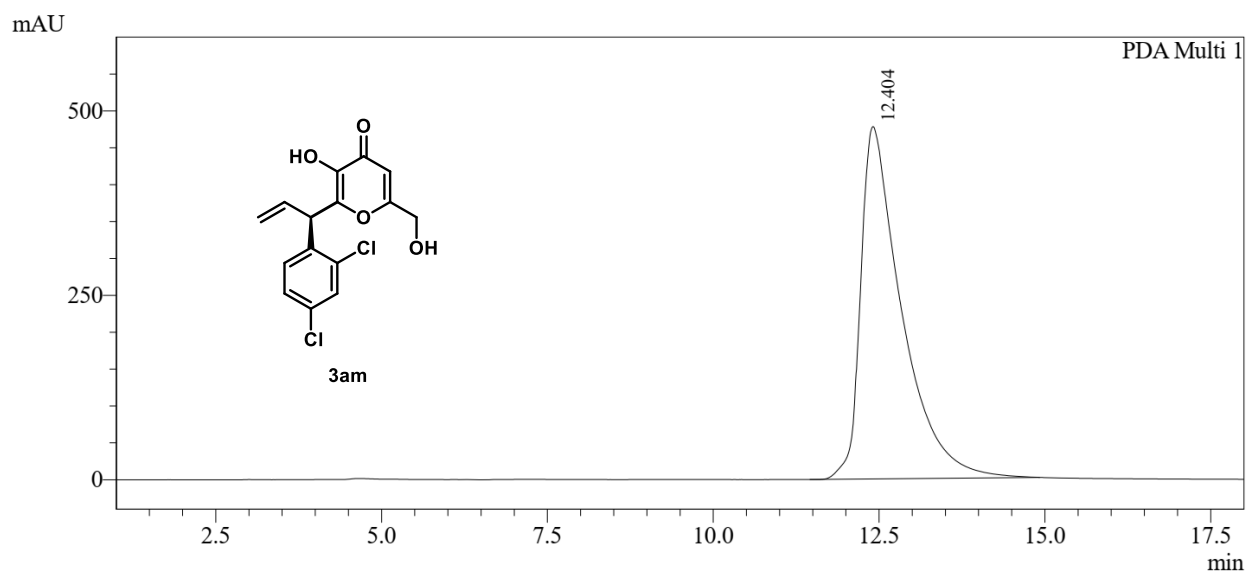

PeakTable

PDA Ch1 288nm 4nm

| Peak# | Ret. Time | Area     | Area %  |
|-------|-----------|----------|---------|
| 1     | 12.404    | 20547043 | 100.000 |
| Total |           | 20547043 | 100.000 |

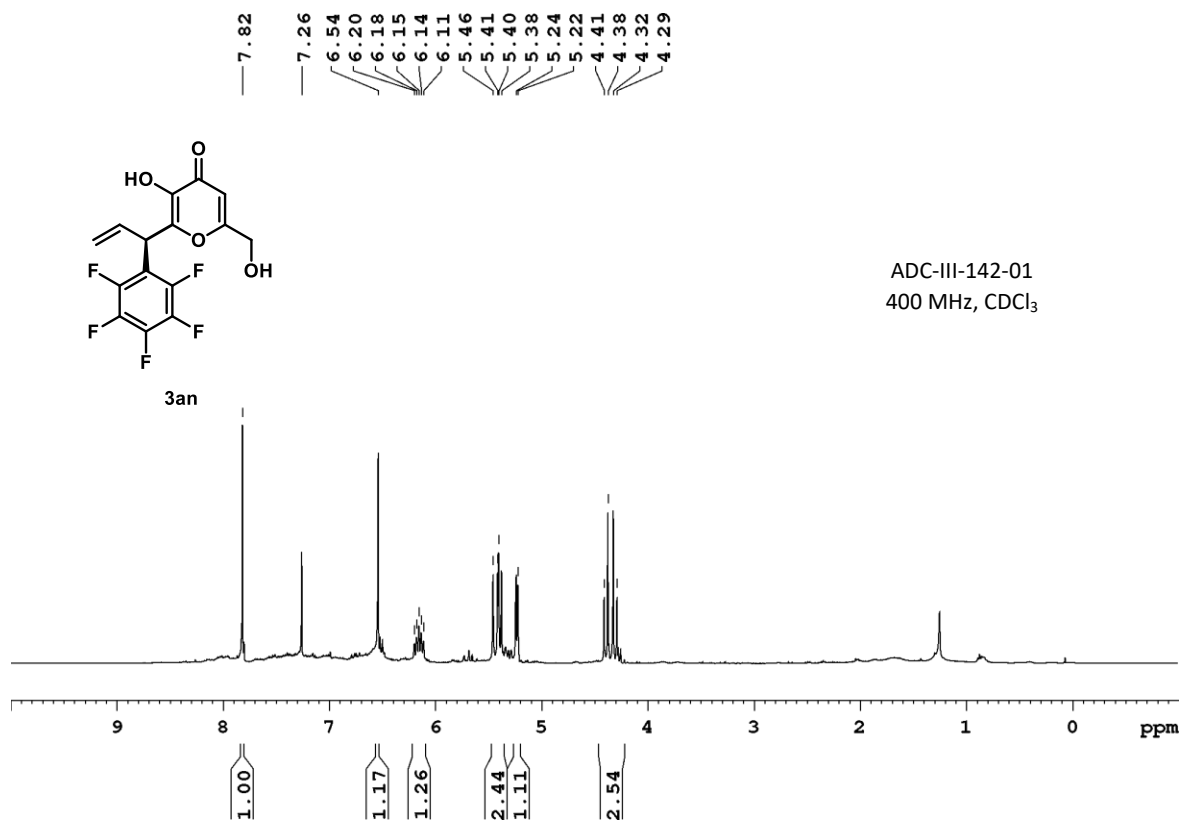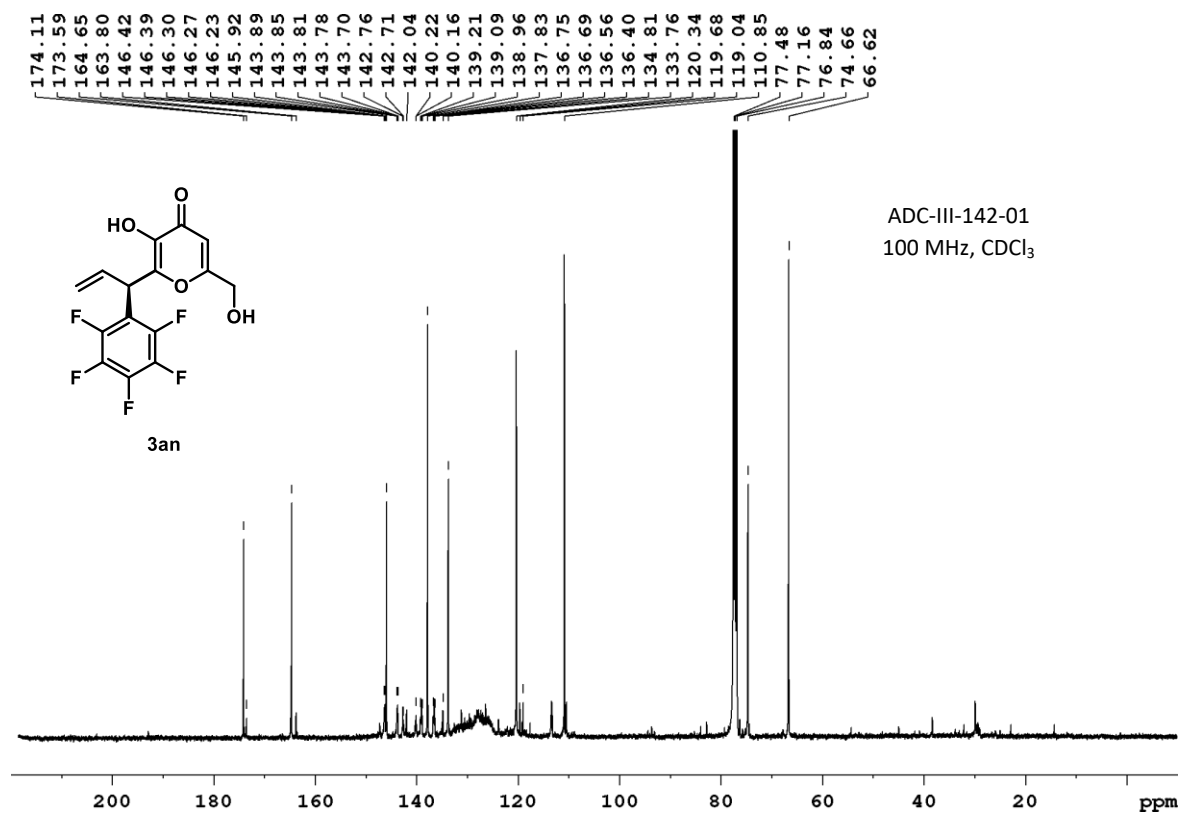

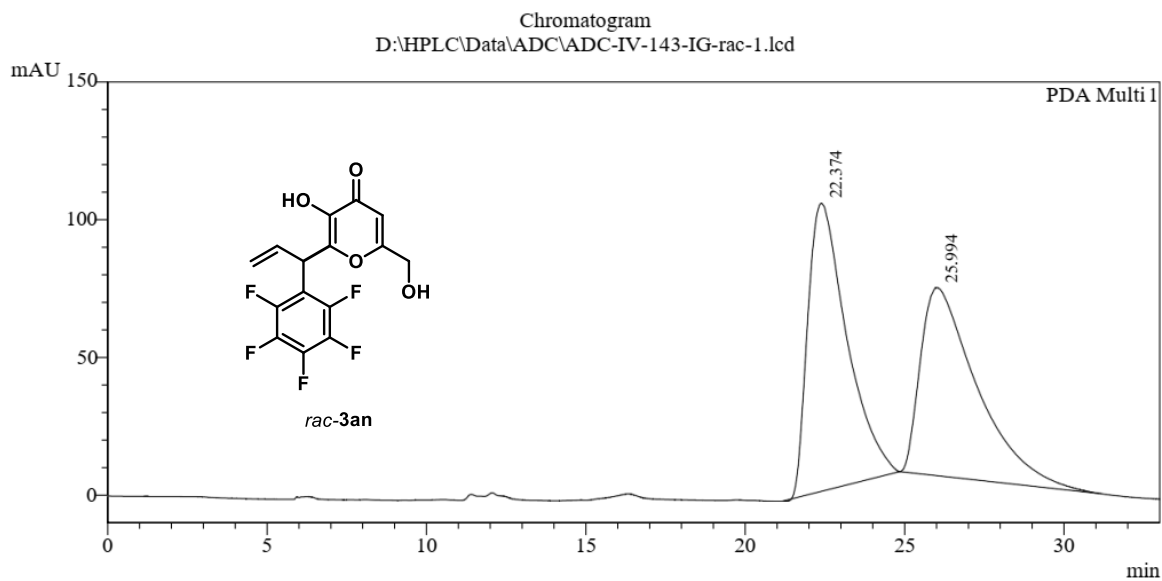

PeakTable

PDA Ch1 241nm 4nm

| Peak# | Ret. Time | Area     | Area %  |
|-------|-----------|----------|---------|
| 1     | 22.374    | 8825292  | 51.310  |
| 2     | 25.994    | 8374509  | 48.690  |
| Total |           | 17199800 | 100.000 |

Daicel Chiralpak AD-H column (90:10 *n*-Hexane/*i*-PrOH, 1.0 mL/min, 20 °C)

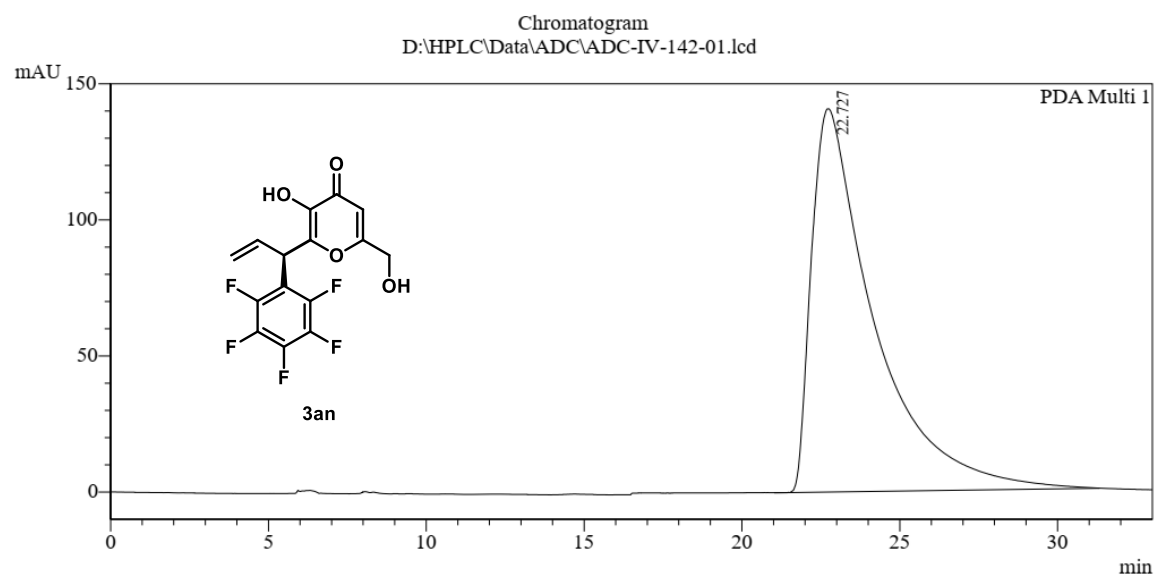

PeakTable

PDA Ch1 241nm 4nm

| Peak# | Ret. Time | Area     | Area %  |
|-------|-----------|----------|---------|
| 1     | 22.727    | 19376672 | 100.000 |
| Total |           | 19376672 | 100.000 |

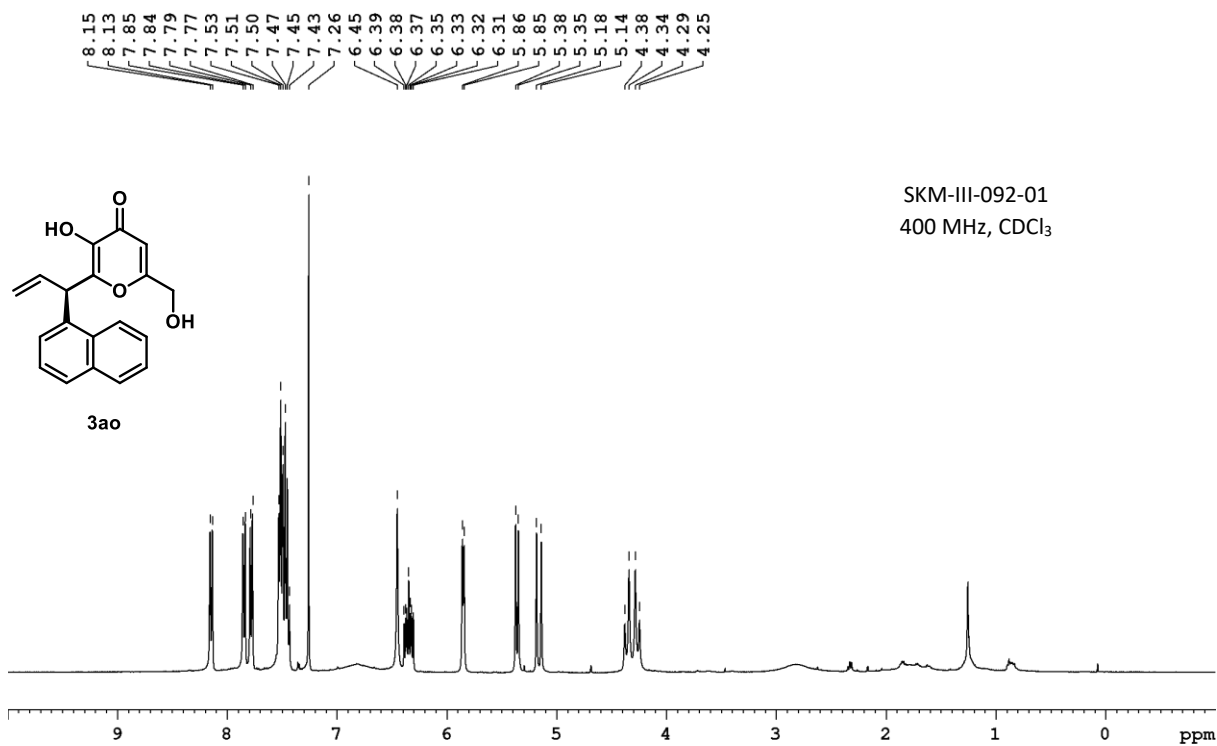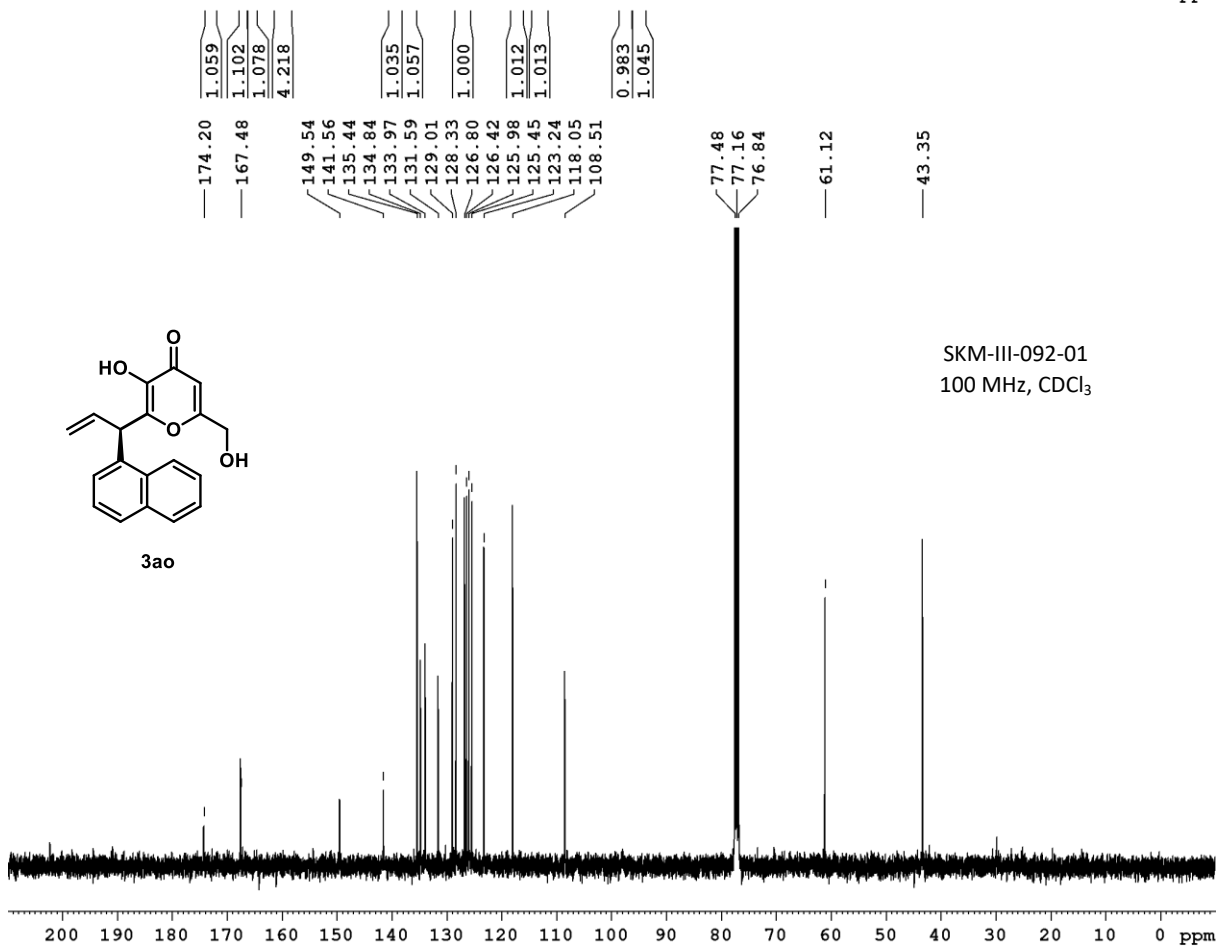

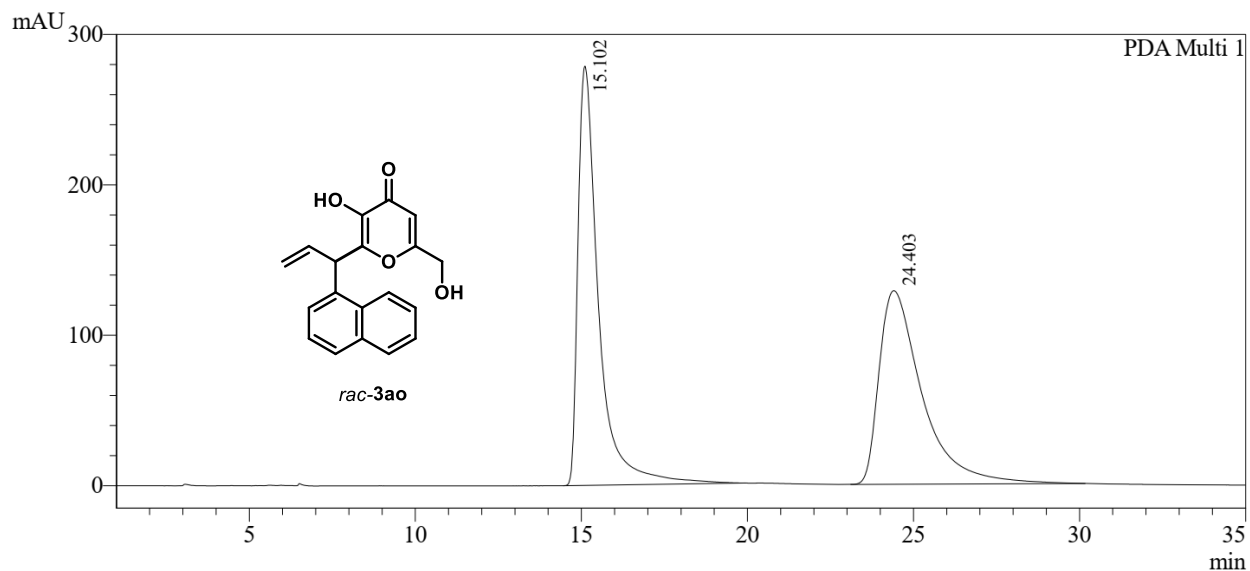

PeakTable

PDA Ch1 281nm 4nm

| Peak# | Ret. Time | Area     | Area %  |
|-------|-----------|----------|---------|
| 1     | 15.102    | 12043561 | 50.903  |
| 2     | 24.403    | 11616314 | 49.097  |
| Total |           | 23659874 | 100.000 |

Daicel Chiralpak IH column (85:15 *n*-Hexane/*i*-PrOH, 1.0 mL/min, 20 °C)

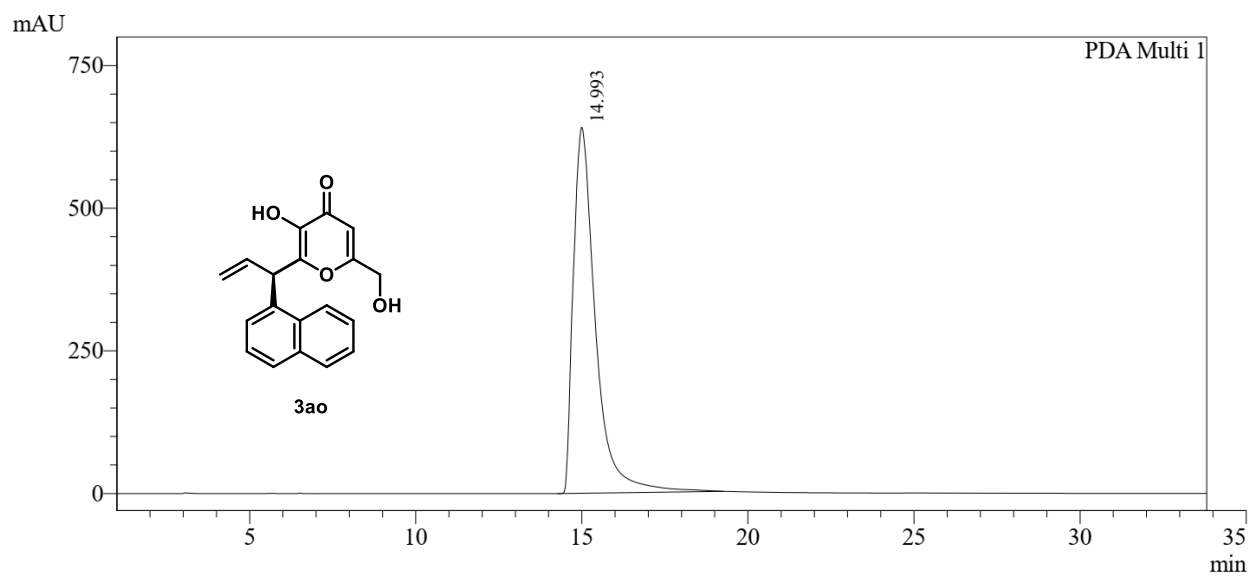

PeakTable

PDA Ch1 281nm 4nm

| Peak# | Ret. Time | Area     | Area %  |
|-------|-----------|----------|---------|
| 1     | 14.993    | 29763637 | 100.000 |
| Total |           | 29763637 | 100.000 |



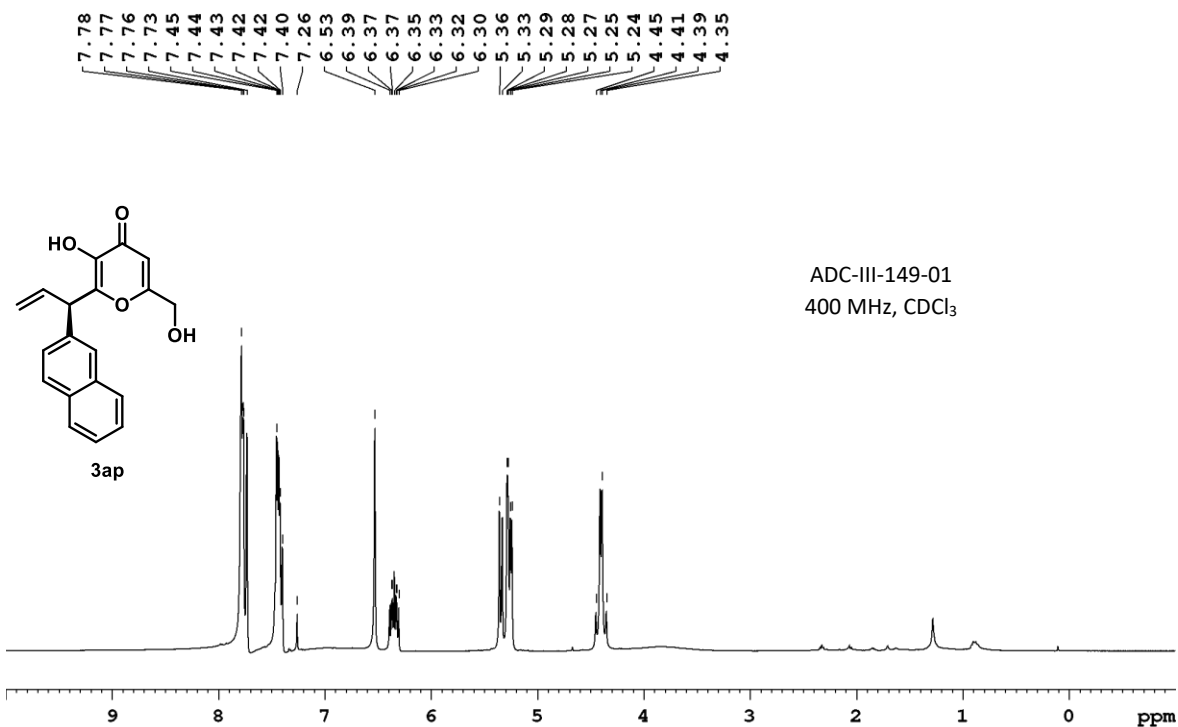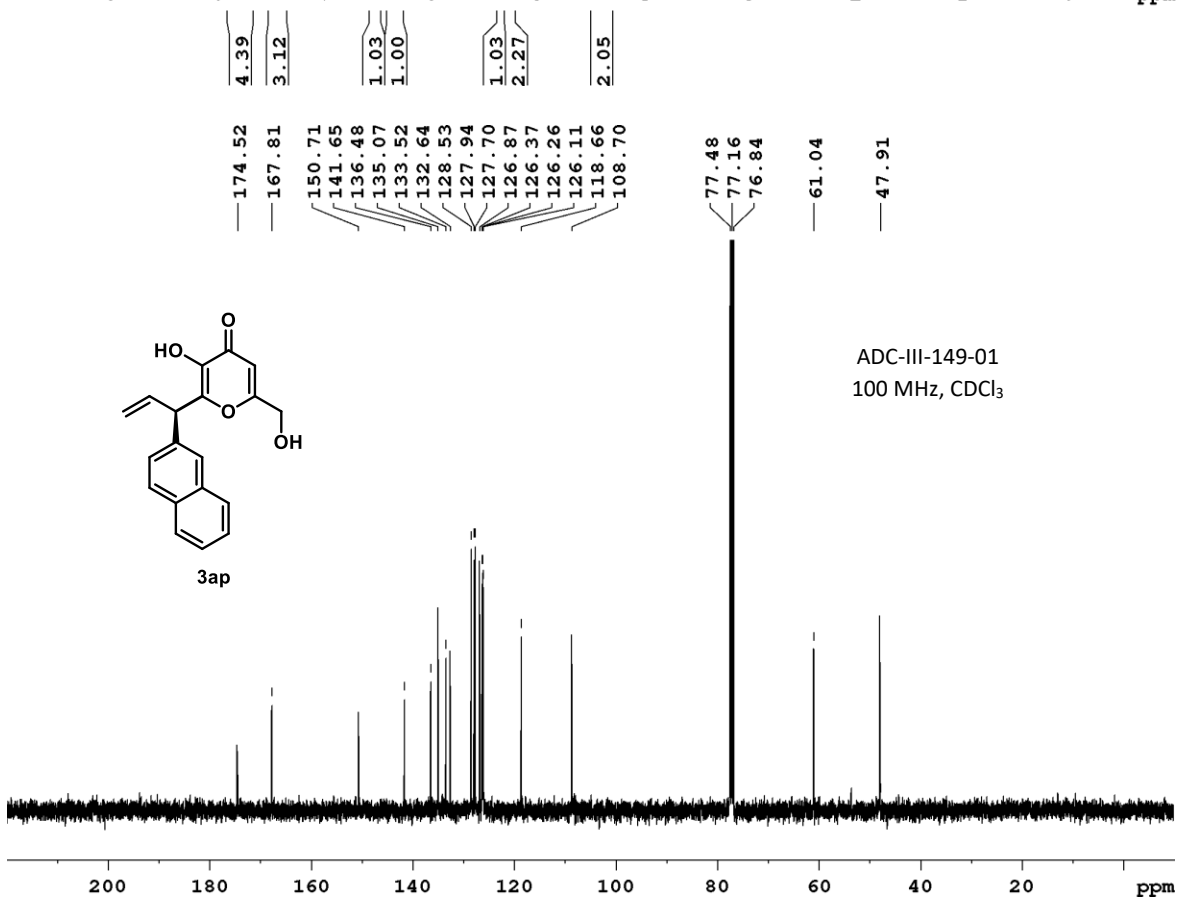

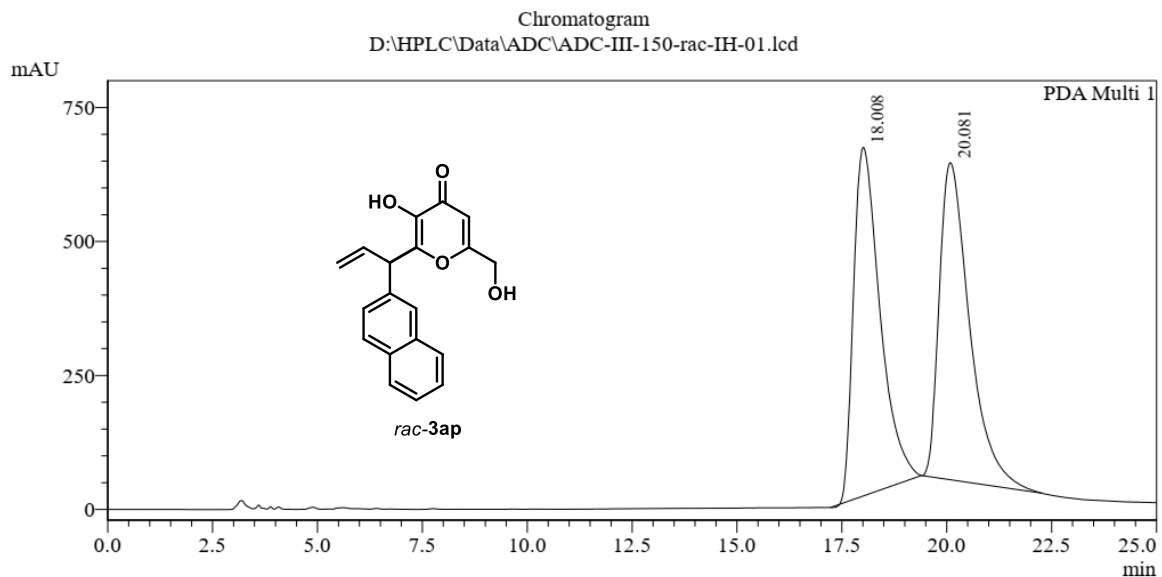

PeakTable

PDA Ch1 221nm 4nm

| Peak# | Ret. Time | Area     | Area %  |
|-------|-----------|----------|---------|
| 1     | 18.008    | 28636919 | 49.075  |
| 2     | 20.081    | 29716098 | 50.925  |
| Total |           | 58353016 | 100.000 |

Daicel Chiralpak IH column (85:15 *n*-Hexane/*i*-PrOH, 1.0 mL/min, 20 °C)

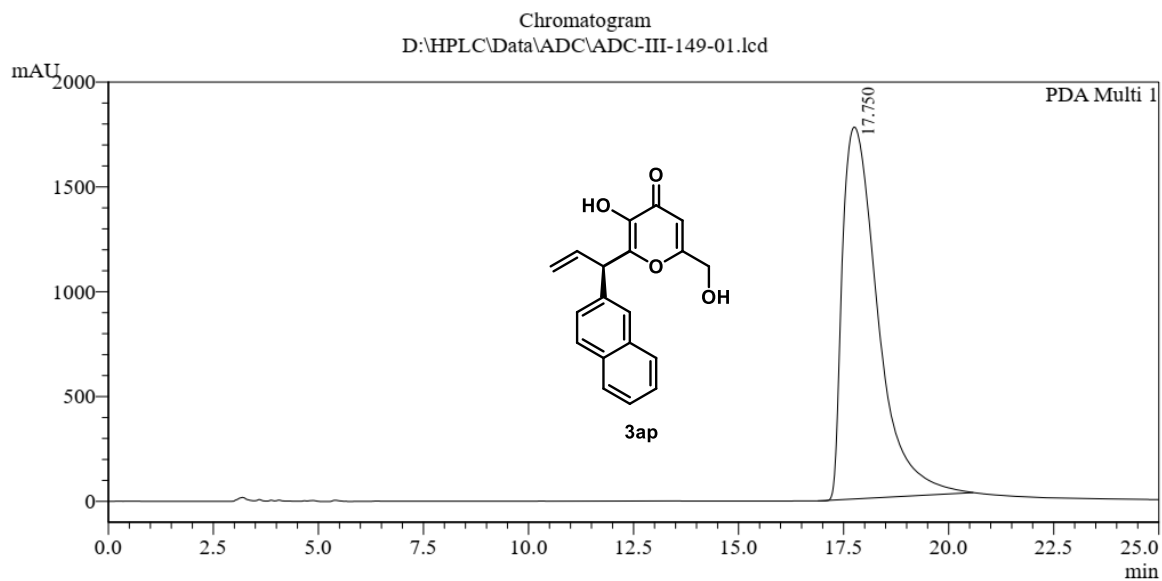

PeakTable

PDA Ch1 221nm 4nm

| Peak# | Ret. Time | Area      | Area %  |
|-------|-----------|-----------|---------|
| 1     | 17.750    | 104515516 | 100.000 |
| Total |           | 104515516 | 100.000 |

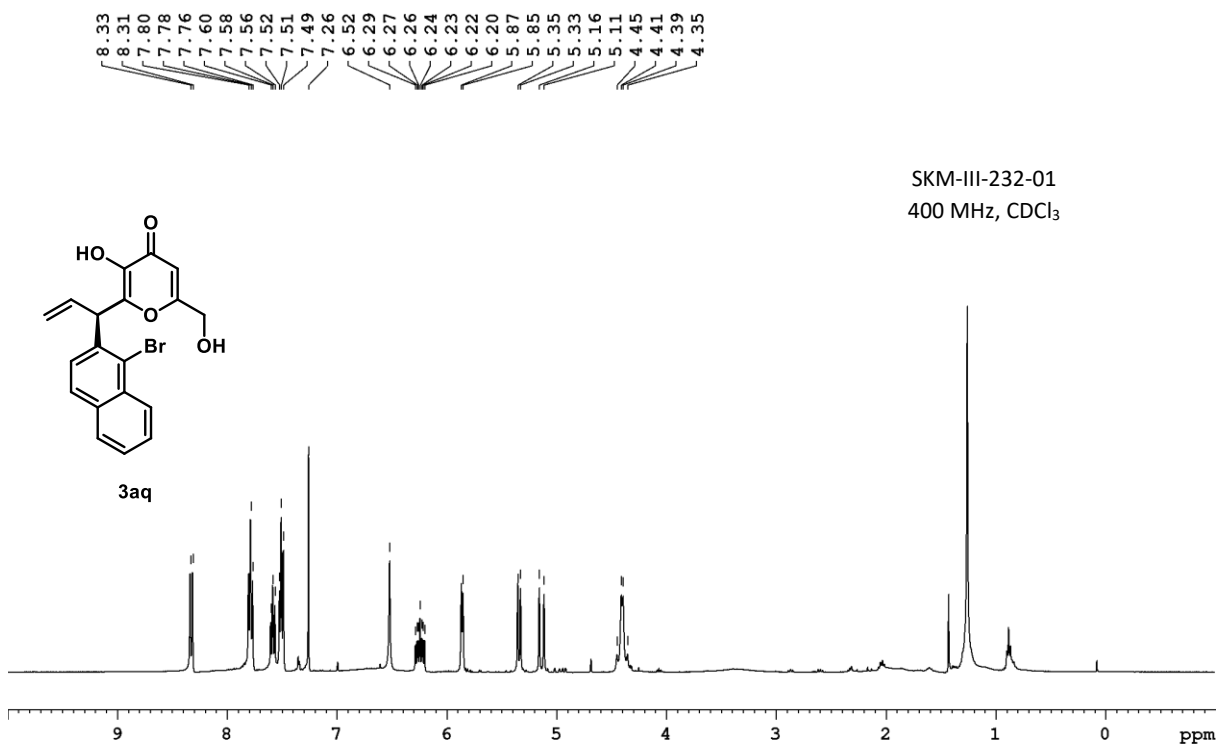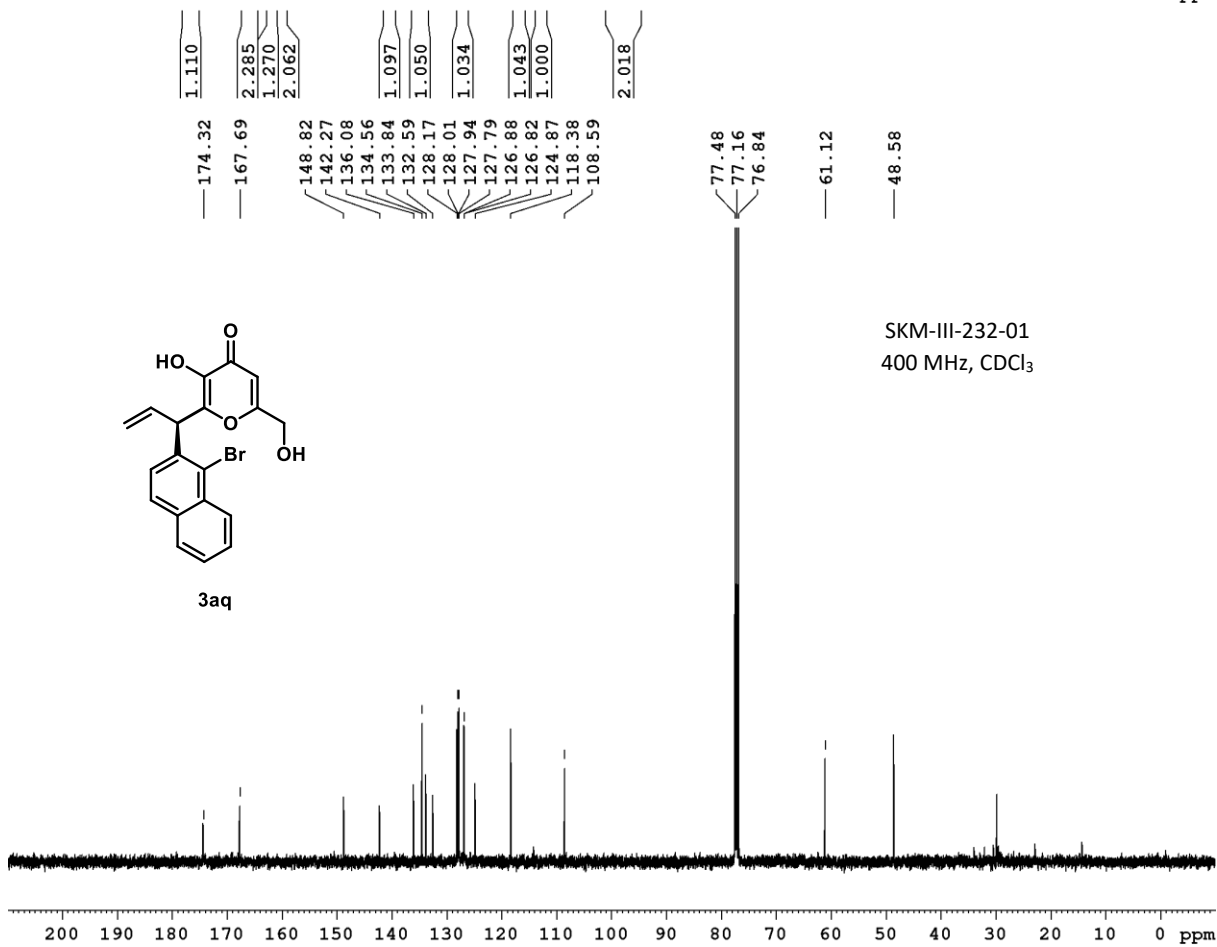

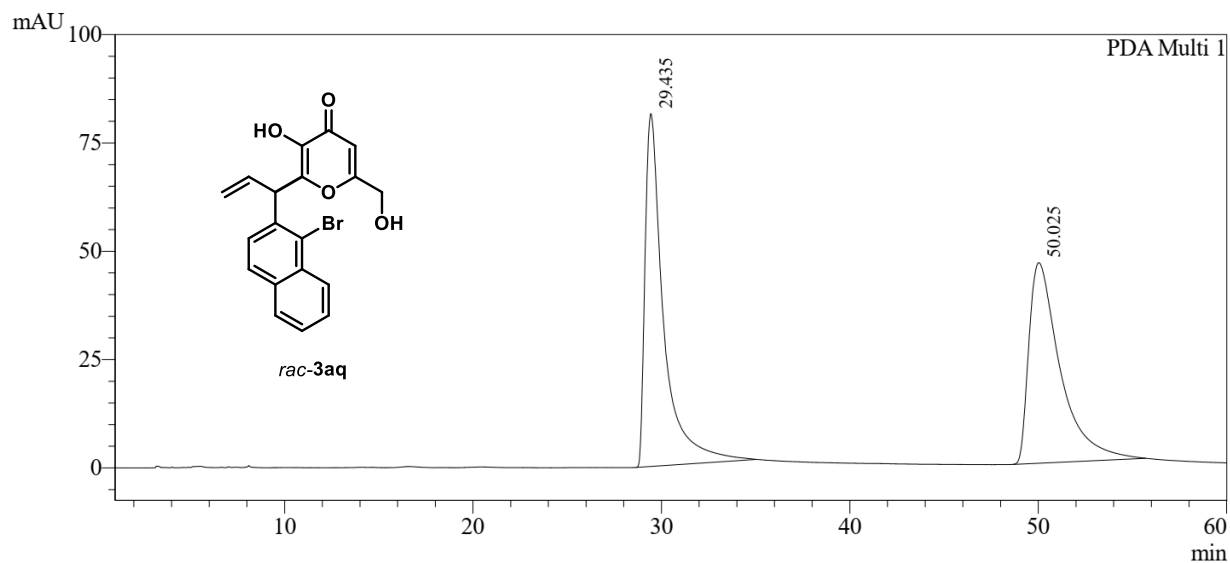

PeakTable

PDA Ch1 280nm 4nm

| Peak# | Ret. Time | Area     | Area %  |
|-------|-----------|----------|---------|
| 1     | 29.435    | 5600391  | 51.069  |
| 2     | 50.025    | 5365901  | 48.931  |
| Total |           | 10966292 | 100.000 |

Daicel Chiralpak IC column (90:10 *n*-Hexane/*i*-PrOH, 1.0 mL/min, 20 °C)

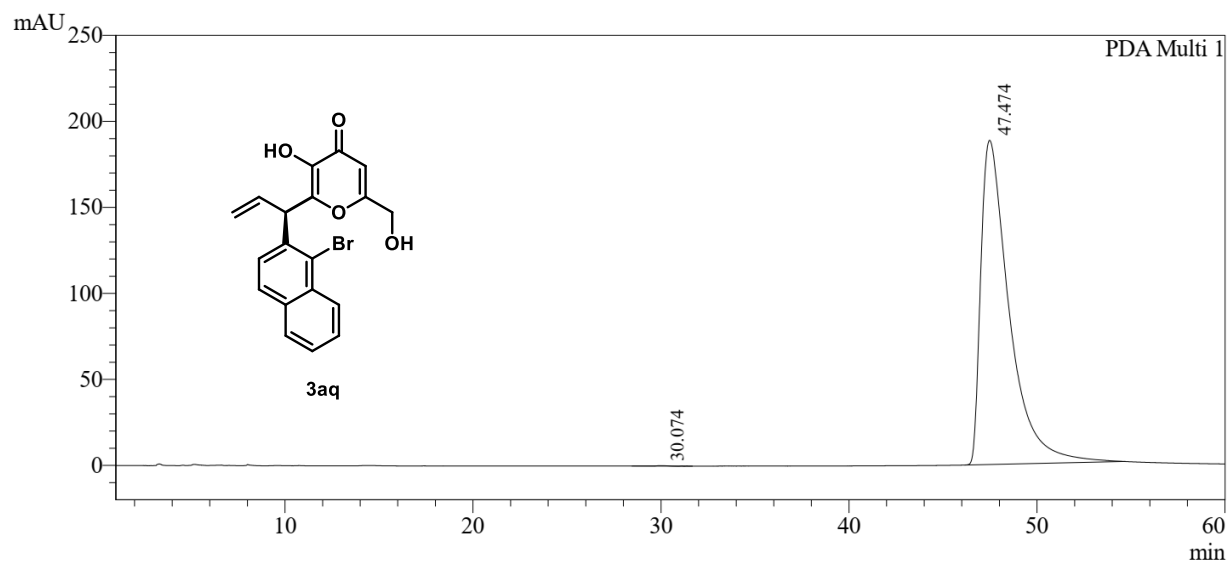

PeakTable

PDA Ch1 280nm 4nm

| Peak# | Ret. Time | Area     | Area %  |
|-------|-----------|----------|---------|
| 1     | 30.074    | 8815     | 0.044   |
| 2     | 47.474    | 19841047 | 99.956  |
| Total |           | 19849862 | 100.000 |

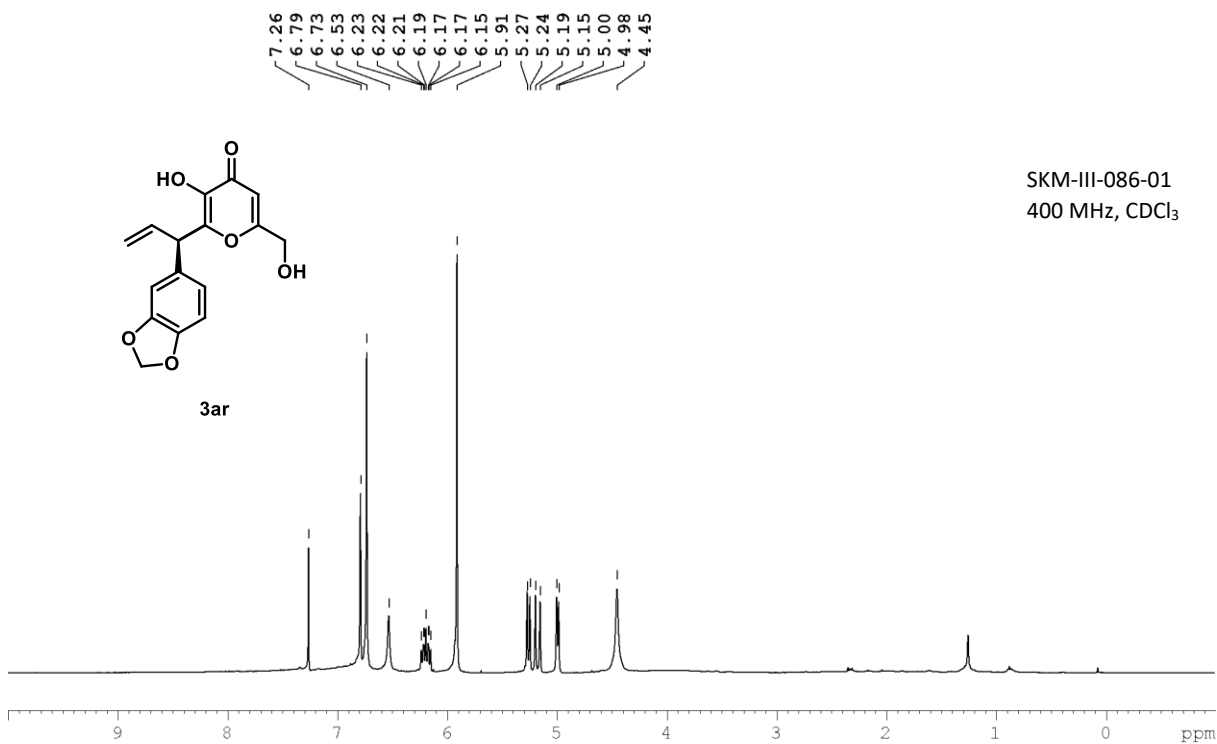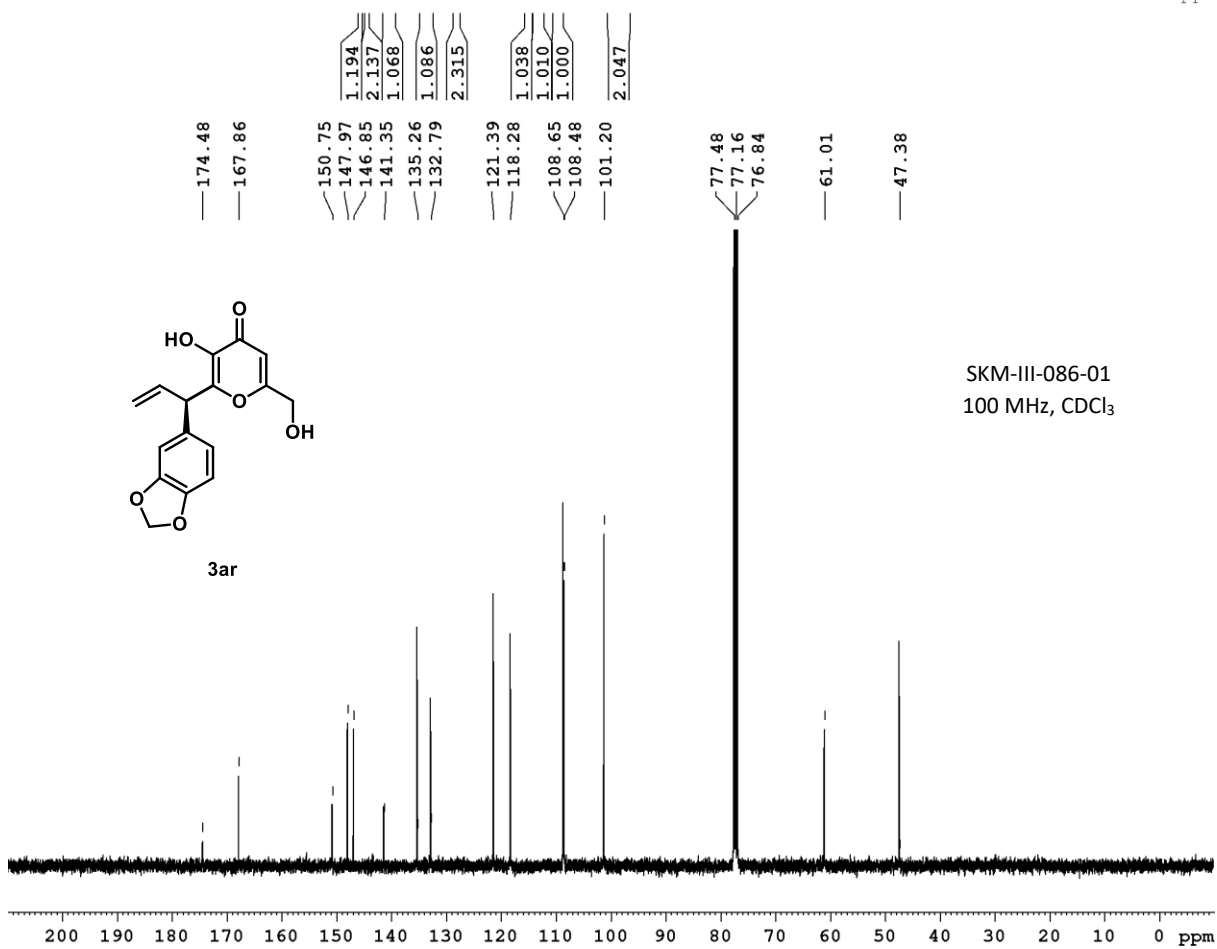

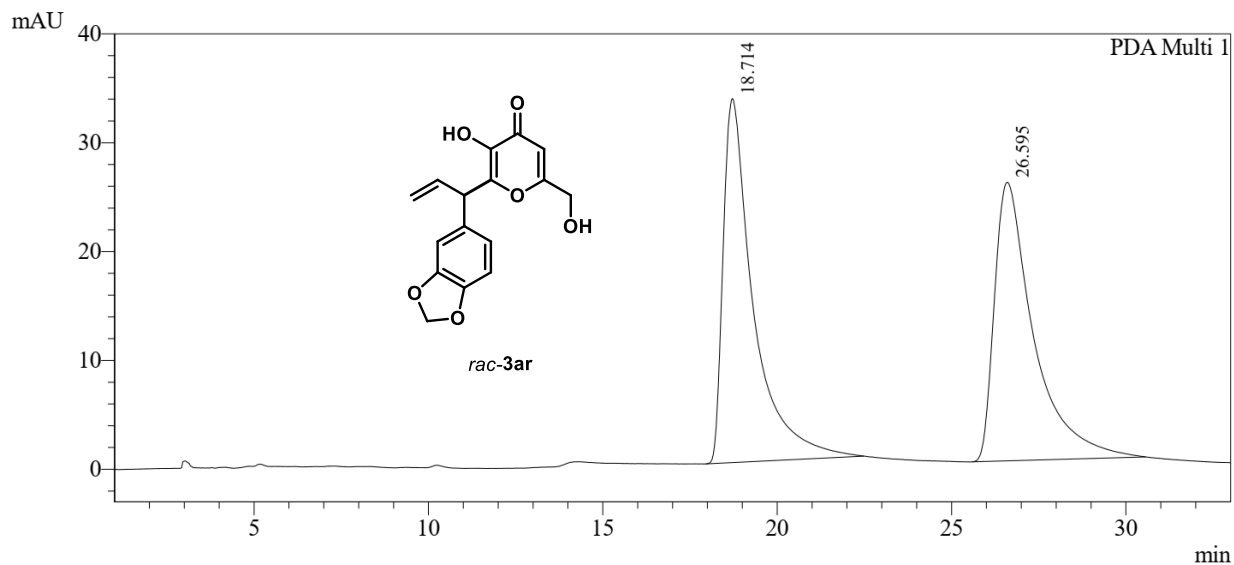

PeakTable

PDA Ch1 282nm 4nm

| Peak# | Ret. Time | Area    | Area %  |
|-------|-----------|---------|---------|
| 1     | 18.714    | 2013359 | 50.194  |
| 2     | 26.595    | 1997831 | 49.806  |
| Total |           | 4011190 | 100.000 |

Daicel Chiralpak AD-H column (85:15 *n*-Hexane/*i*-PrOH, 1.0 mL/min, 20 °C)

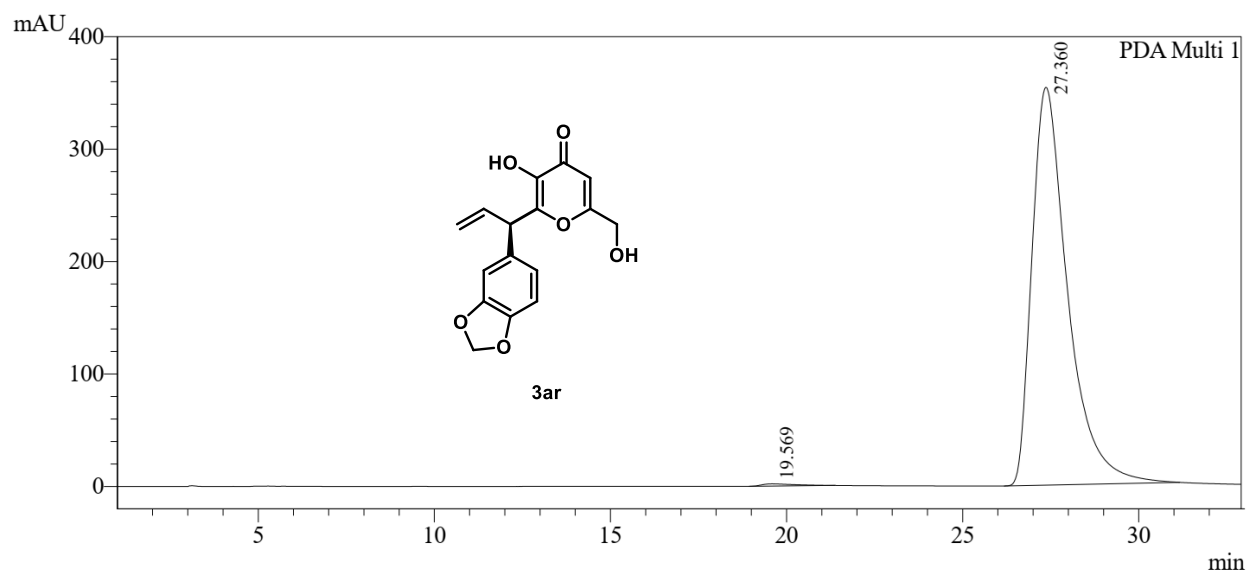

PeakTable

PDA Ch1 282nm 4nm

| Peak# | Ret. Time | Area     | Area %  |
|-------|-----------|----------|---------|
| 1     | 19.569    | 130860   | 0.521   |
| 2     | 27.360    | 24983661 | 99.479  |
| Total |           | 25114520 | 100.000 |

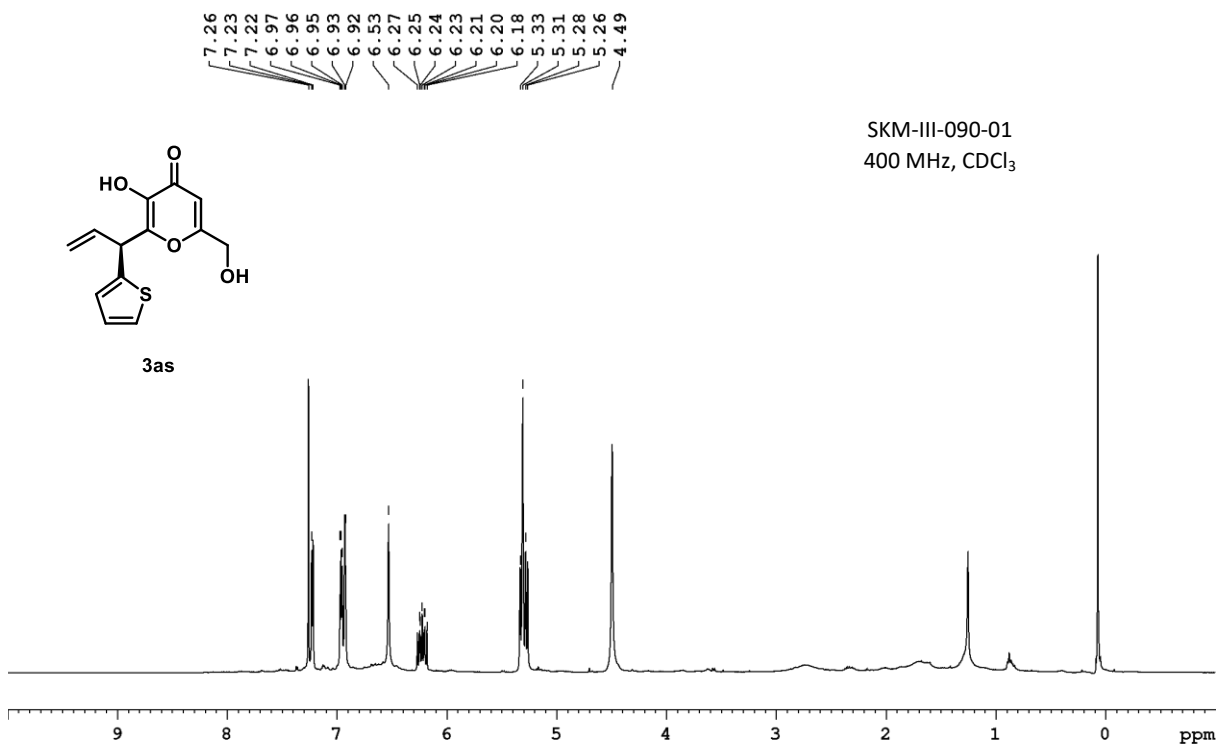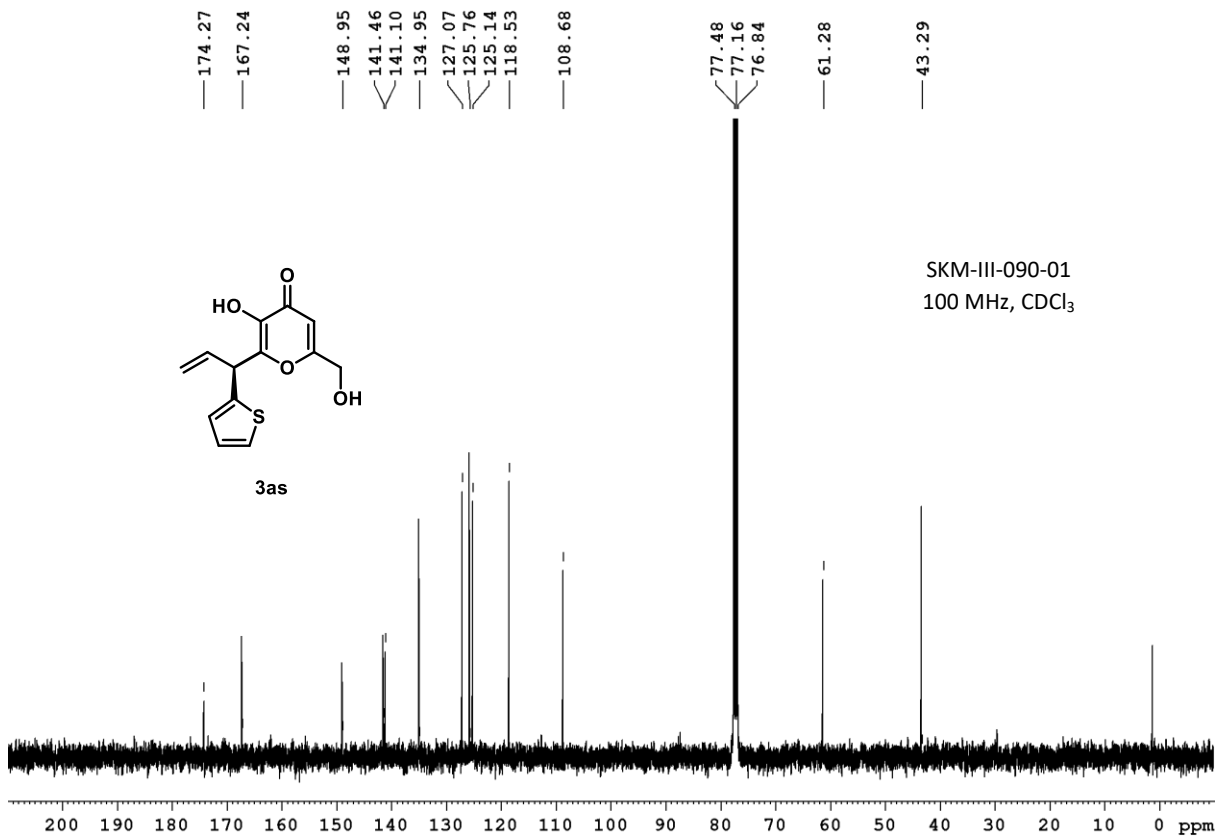

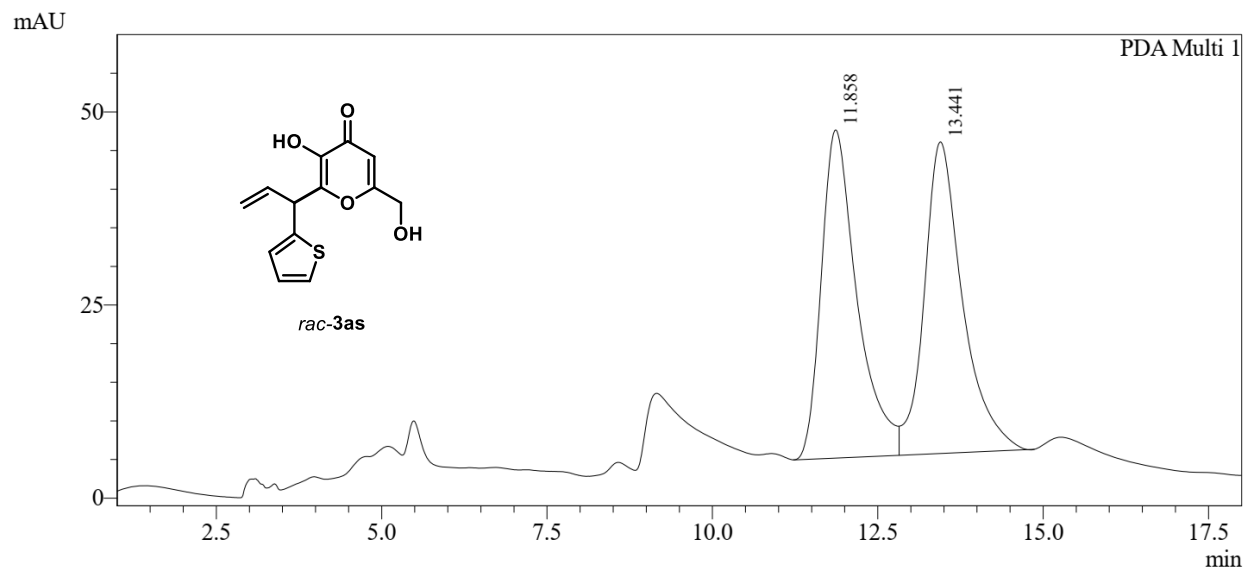

PeakTable

PDA Ch1 276nm 4nm

| Peak# | Ret. Time | Area    | Area %  |
|-------|-----------|---------|---------|
| 1     | 11.858    | 1601446 | 49.606  |
| 2     | 13.441    | 1626908 | 50.394  |
| Total |           | 3228354 | 100.000 |

Daicel Chiralpak AD-H column (85:15 *n*-Hexane/*i*-PrOH, 1.0 mL/min, 20 °C)

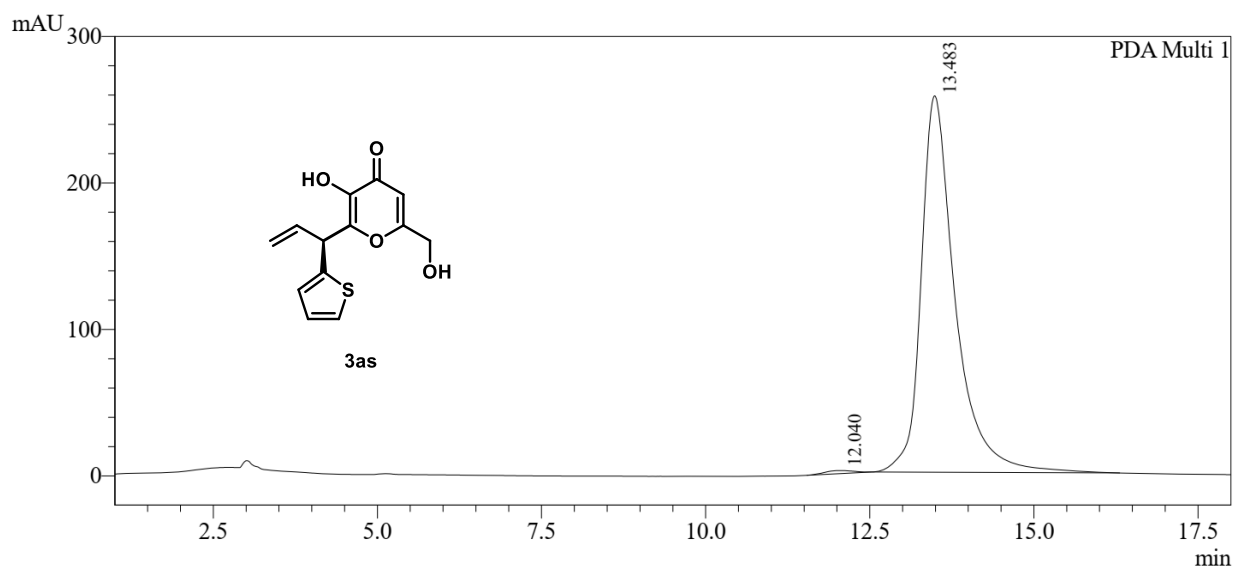

PeakTable

PDA Ch1 276nm 4nm

| Peak# | Ret. Time | Area    | Area %  |
|-------|-----------|---------|---------|
| 1     | 12.040    | 65842   | 0.704   |
| 2     | 13.483    | 9288585 | 99.296  |
| Total |           | 9354427 | 100.000 |



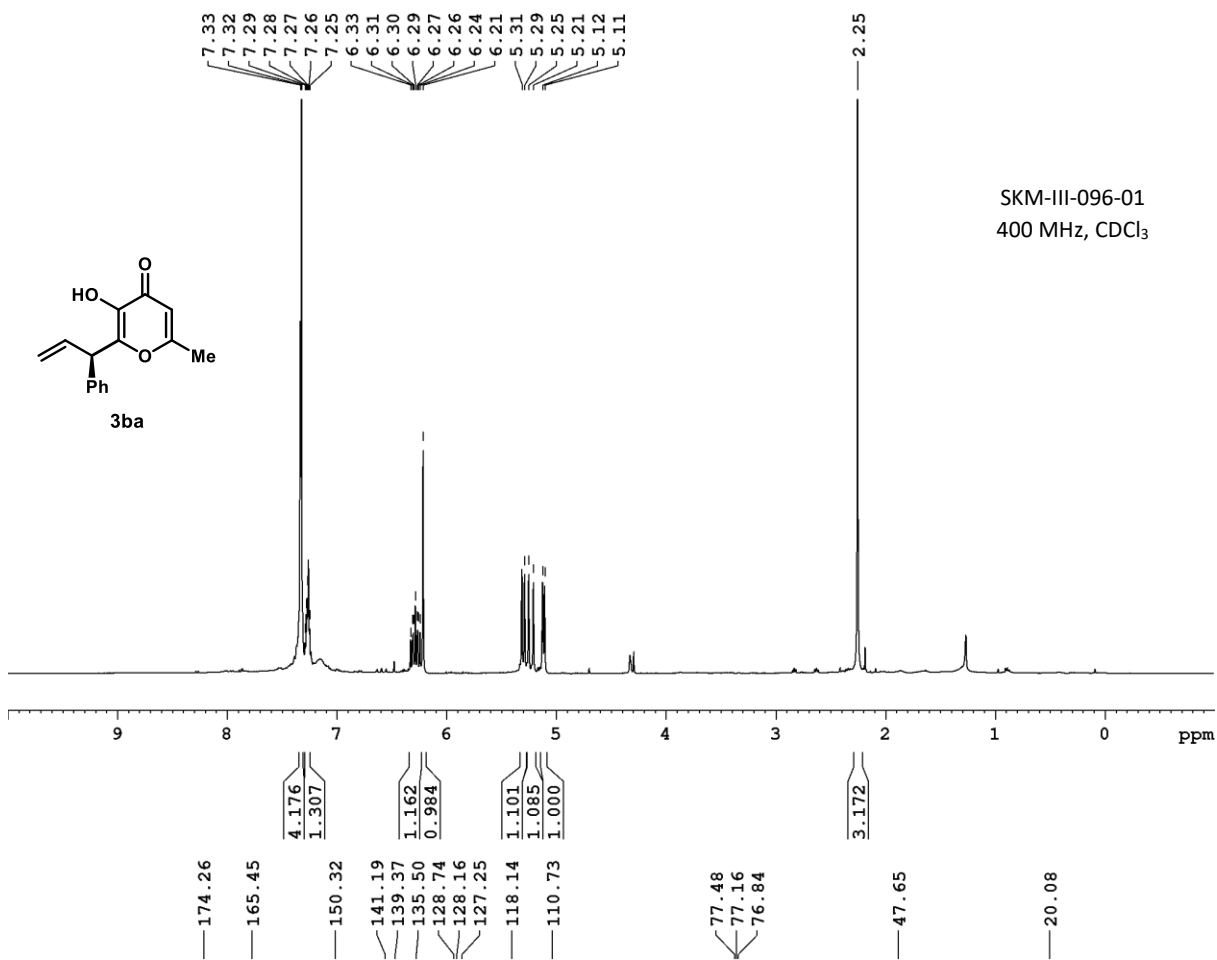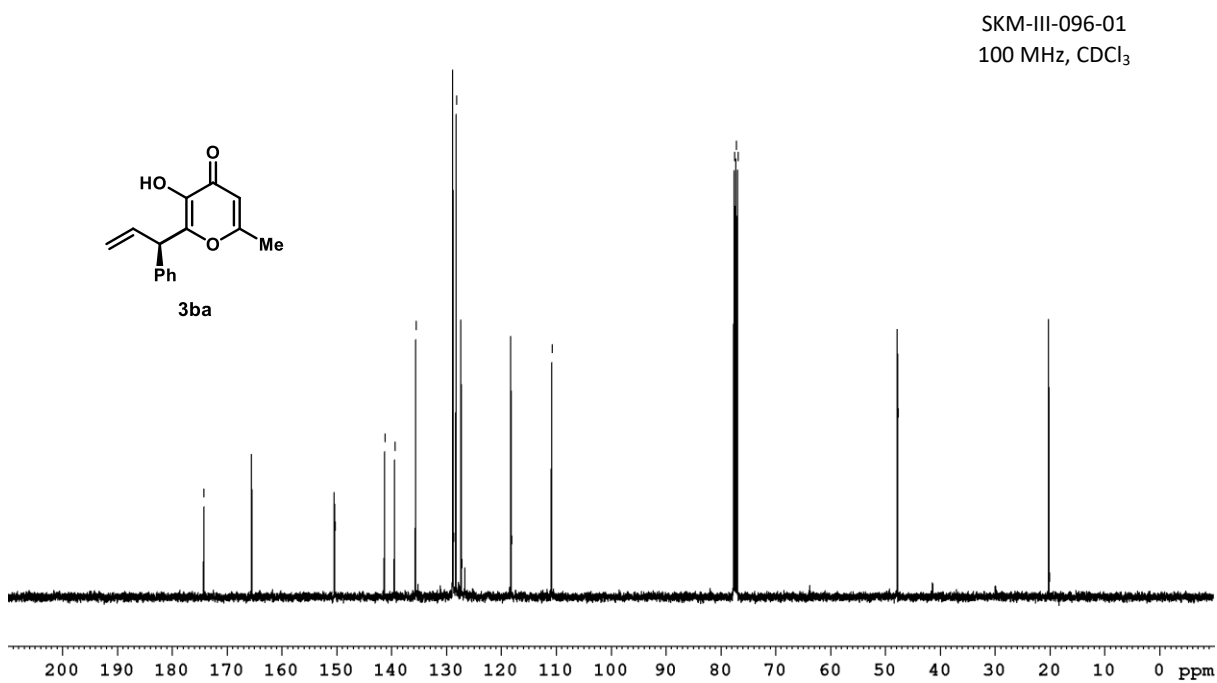

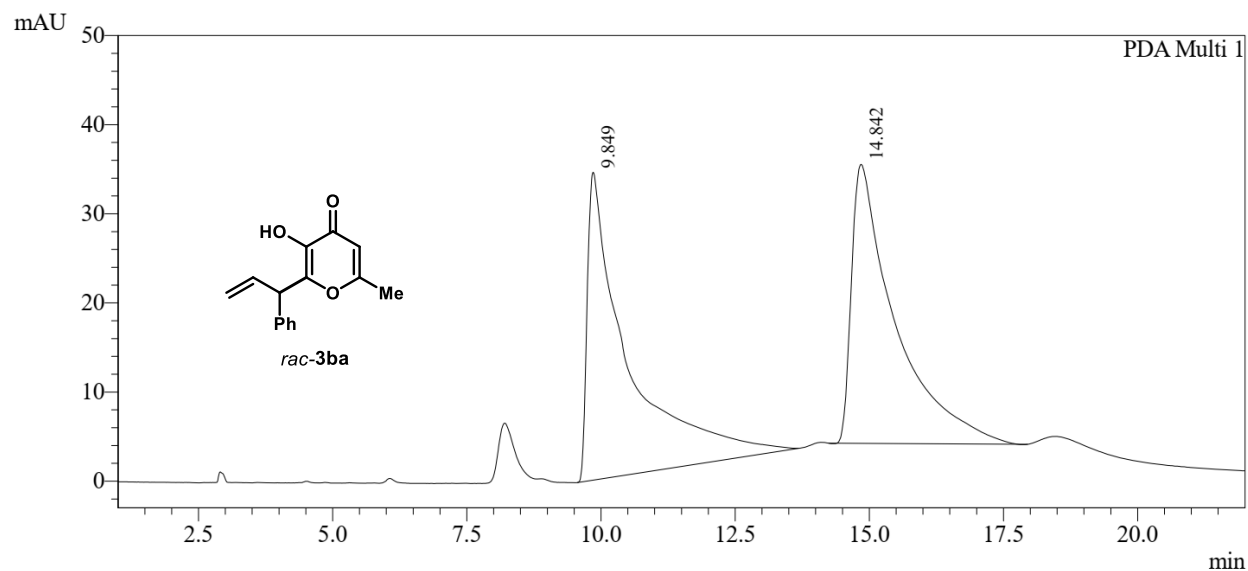

PeakTable

PDA Ch1 276nm 4nm

| Peak# | Ret. Time | Area    | Area %  |
|-------|-----------|---------|---------|
| 1     | 9.849     | 1834843 | 50.987  |
| 2     | 14.842    | 1763816 | 49.013  |
| Total |           | 3598659 | 100.000 |

Phenomenex Cellulose-1 column (90:10 *n*-Hexane/*i*-PrOH, 1.0 mL/min, 20 °C)

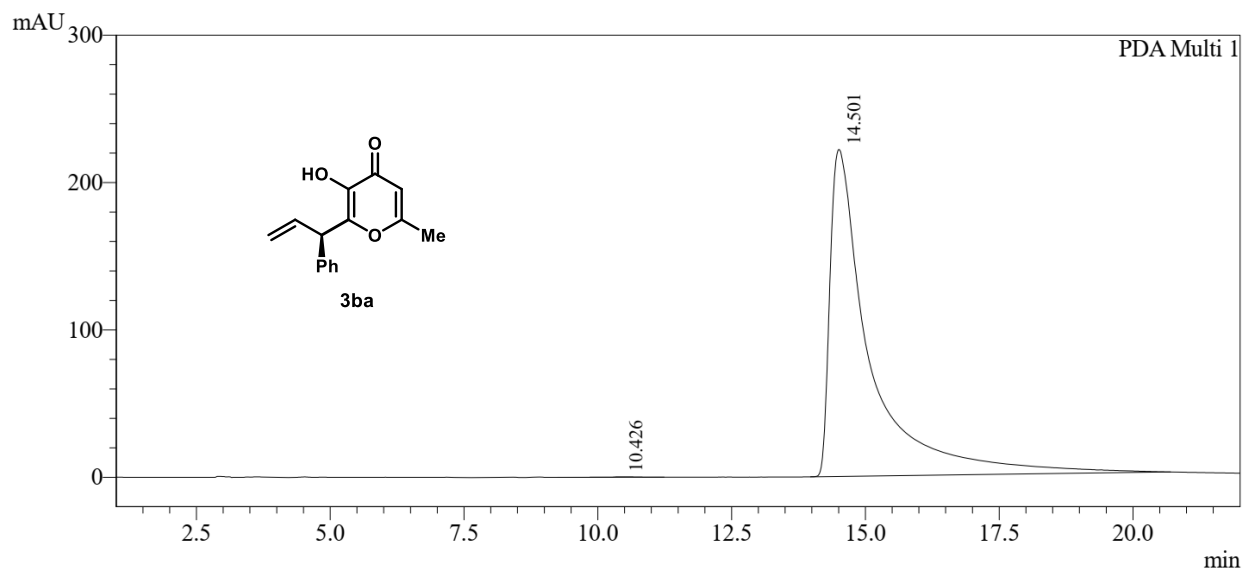

PeakTable

PDA Ch1 276nm 4nm

| Peak# | Ret. Time | Area     | Area %  |
|-------|-----------|----------|---------|
| 1     | 10.426    | 9511     | 0.081   |
| 2     | 14.501    | 11693298 | 99.919  |
| Total |           | 11702809 | 100.000 |

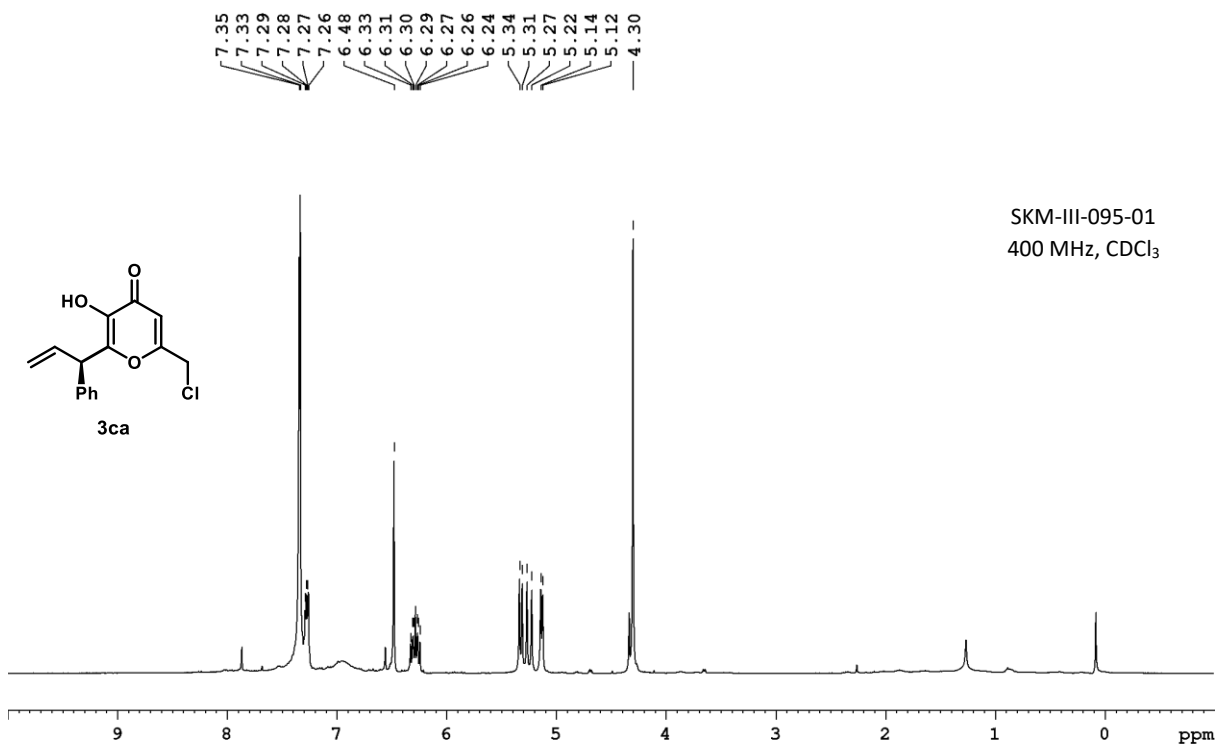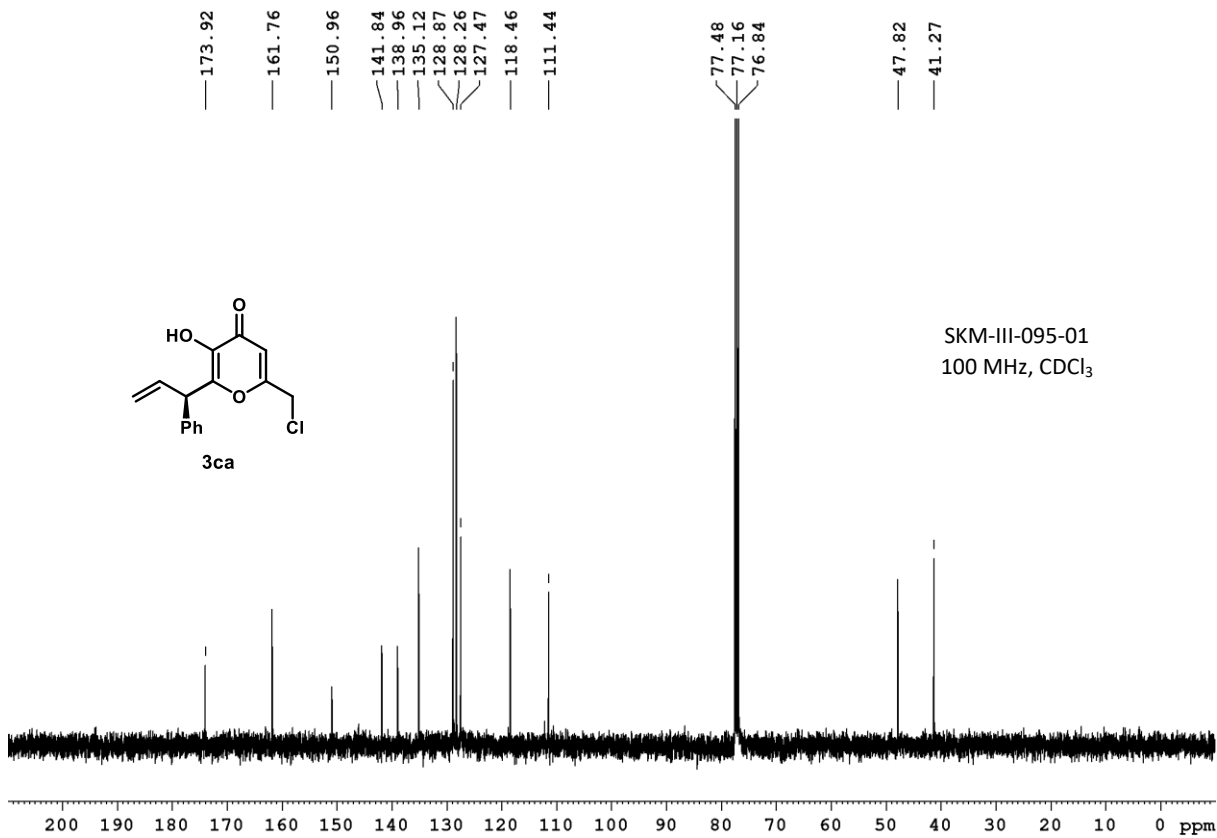

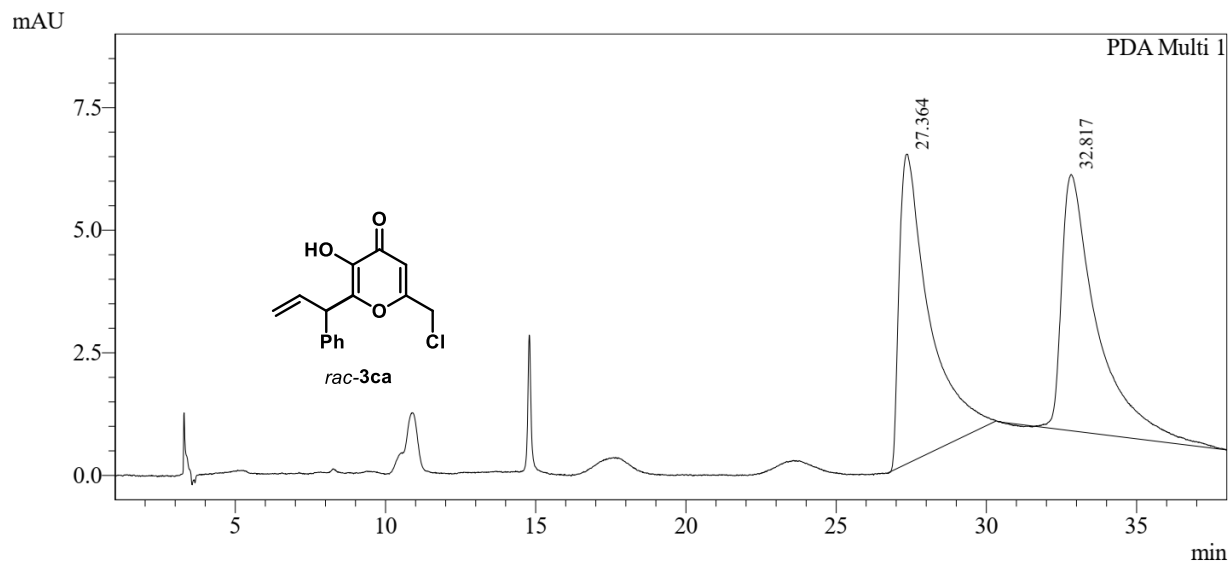

PeakTable

PDA Ch1 305nm 4nm

| Peak# | Ret. Time | Area   | Area %  |
|-------|-----------|--------|---------|
| 1     | 27.364    | 437310 | 50.573  |
| 2     | 32.817    | 427404 | 49.427  |
| Total |           | 864714 | 100.000 |

Daicel Chiralpak IC column (95:5 *n*-Hexane/*i*-PrOH, 1.0 mL/min, 20 °C)

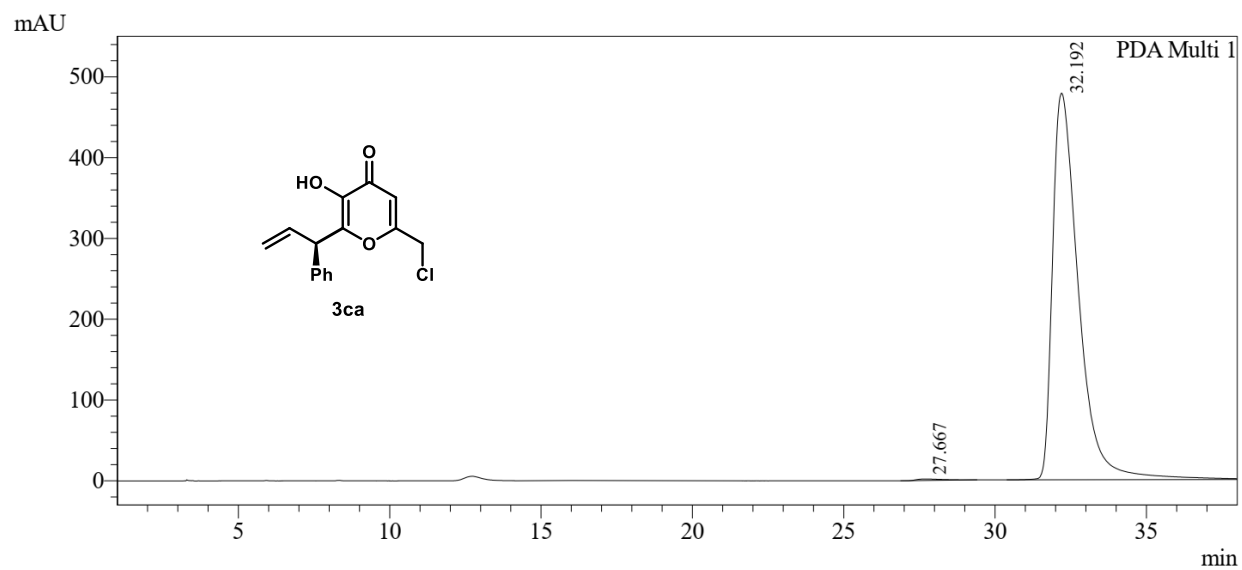

PeakTable

PDA Ch1 305nm 4nm

| Peak# | Ret. Time | Area     | Area %  |
|-------|-----------|----------|---------|
| 1     | 27.667    | 115094   | 0.400   |
| 2     | 32.192    | 28681963 | 99.600  |
| Total |           | 28797057 | 100.000 |

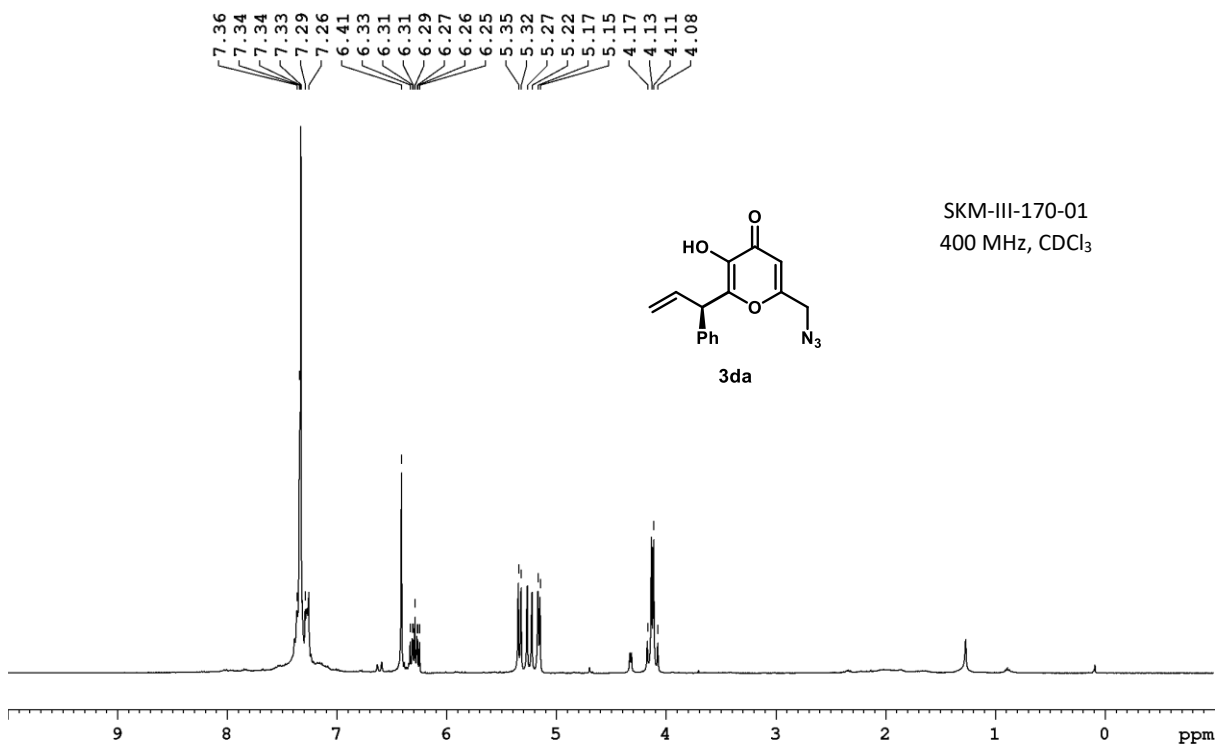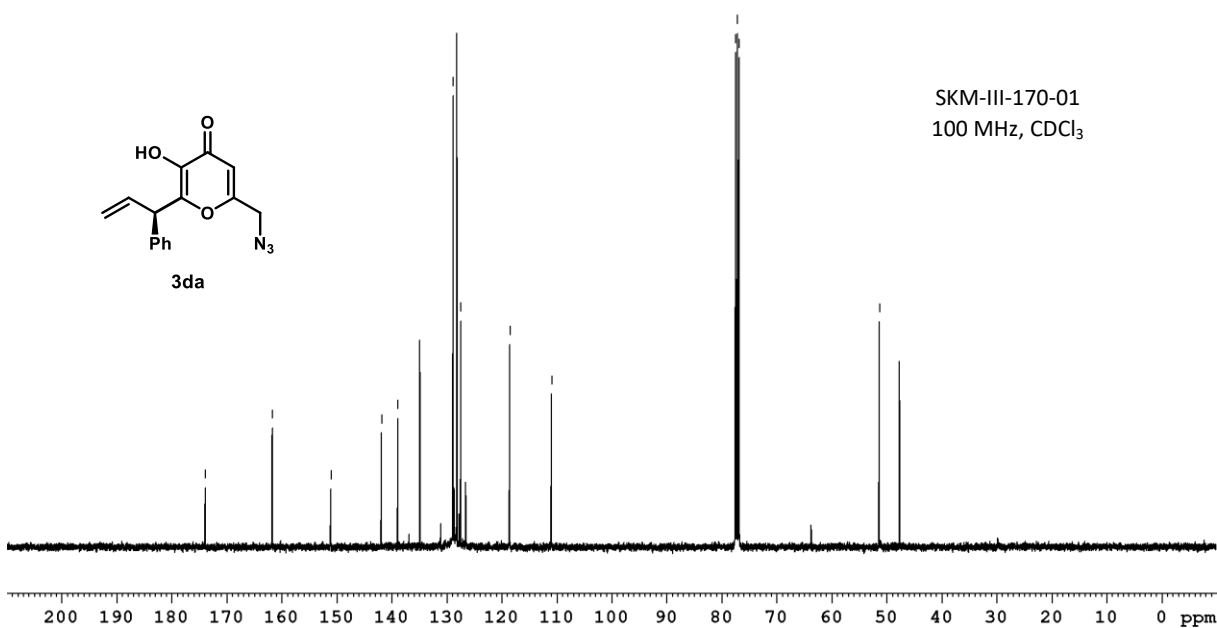

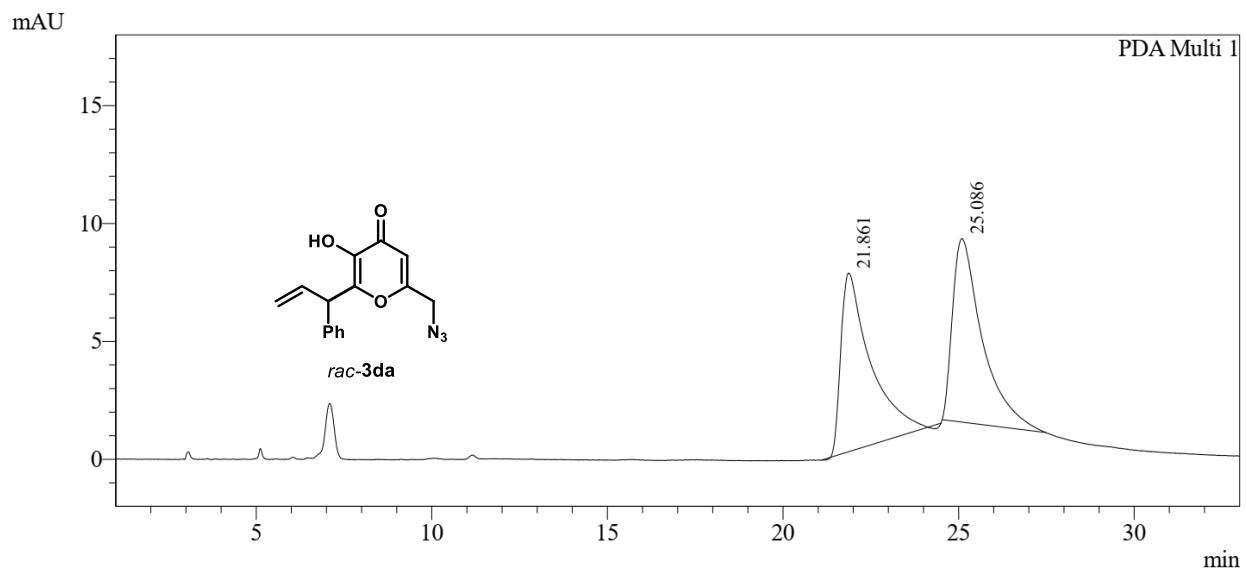

PeakTable

PDA Ch1 282nm 4nm

| Peak# | Ret. Time | Area   | Area %  |
|-------|-----------|--------|---------|
| 1     | 21.861    | 444060 | 49.171  |
| 2     | 25.086    | 459030 | 50.829  |
| Total |           | 903090 | 100.000 |

Daicel Chiralpak IH column (85:15 *n*-Hexane/*i*-PrOH, 1mL/min, 20 °C)

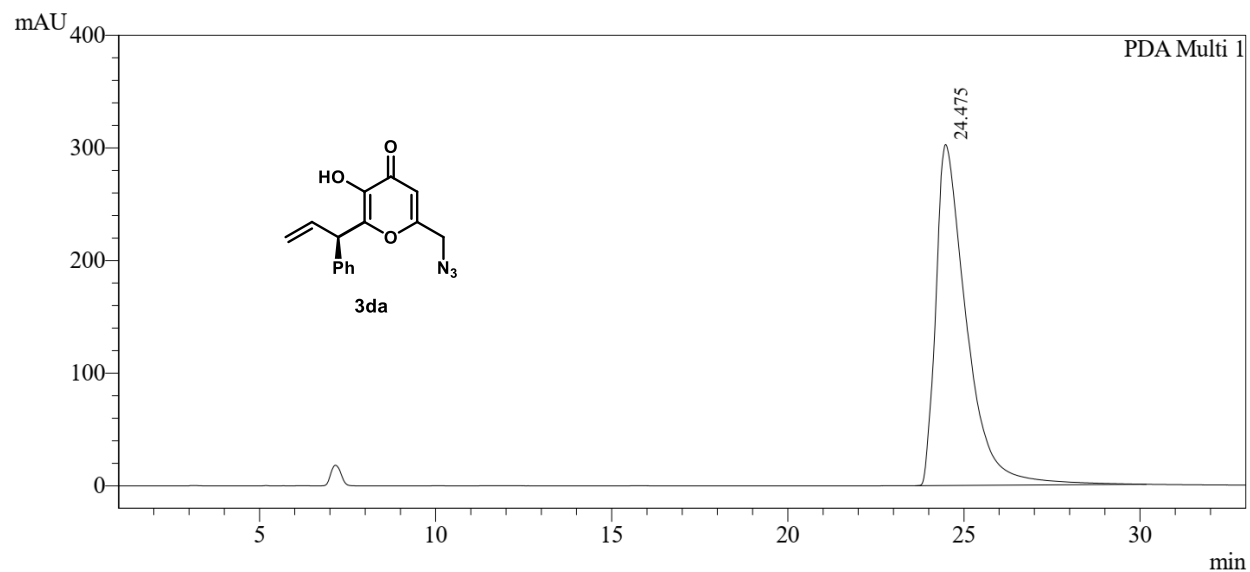

PeakTable

PDA Ch1 282nm 4nm

| Peak# | Ret. Time | Area     | Area %  |
|-------|-----------|----------|---------|
| 1     | 24.475    | 18302946 | 100.000 |
| Total |           | 18302946 | 100.000 |

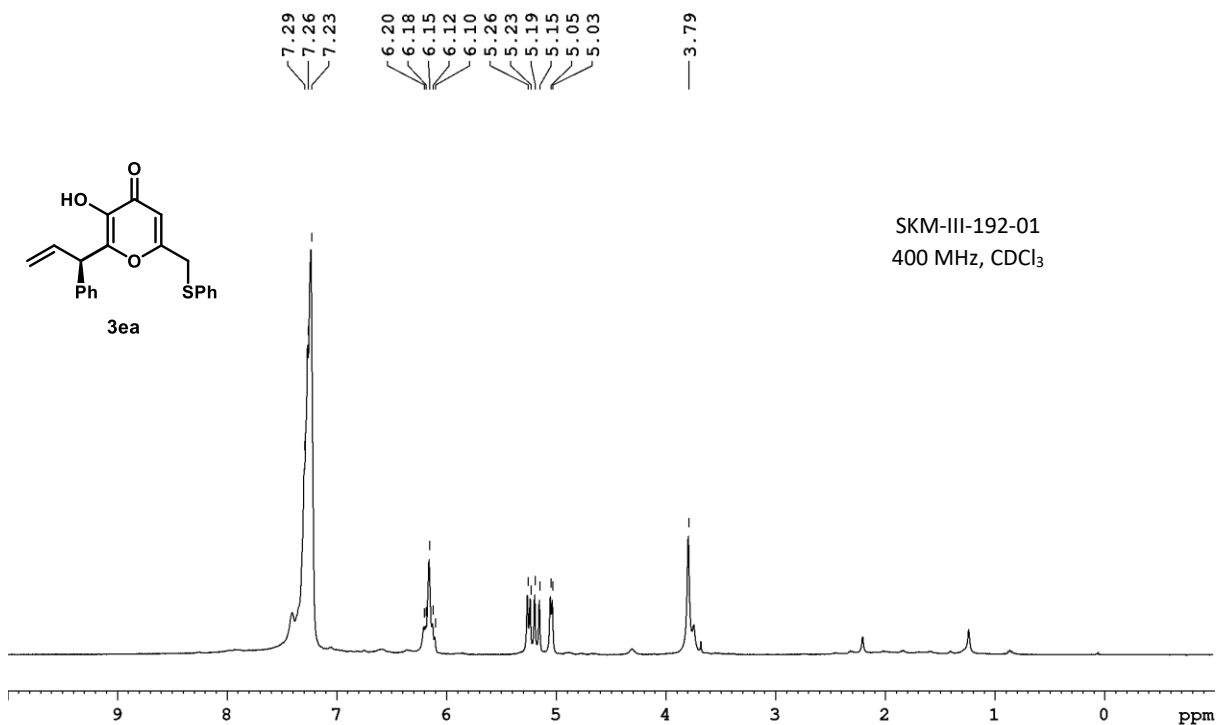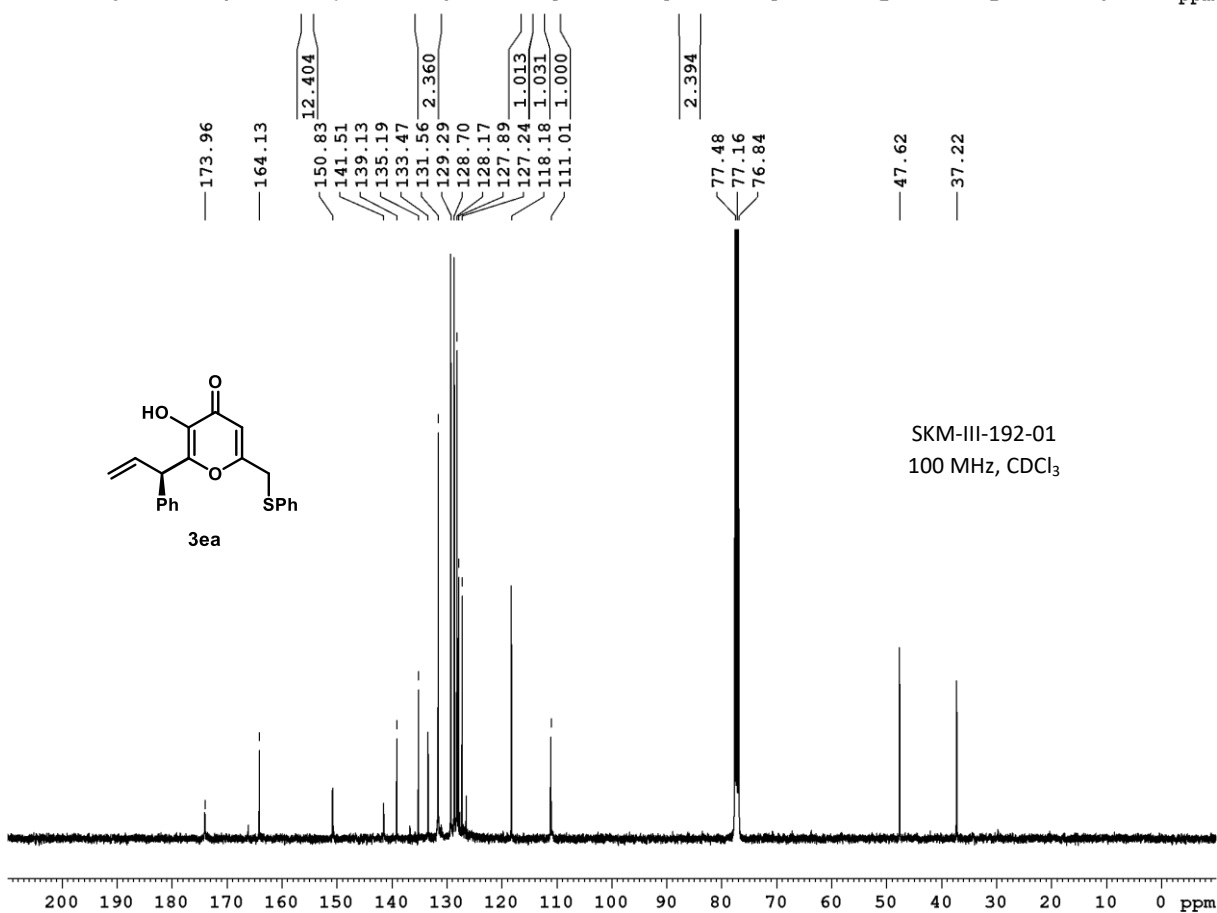

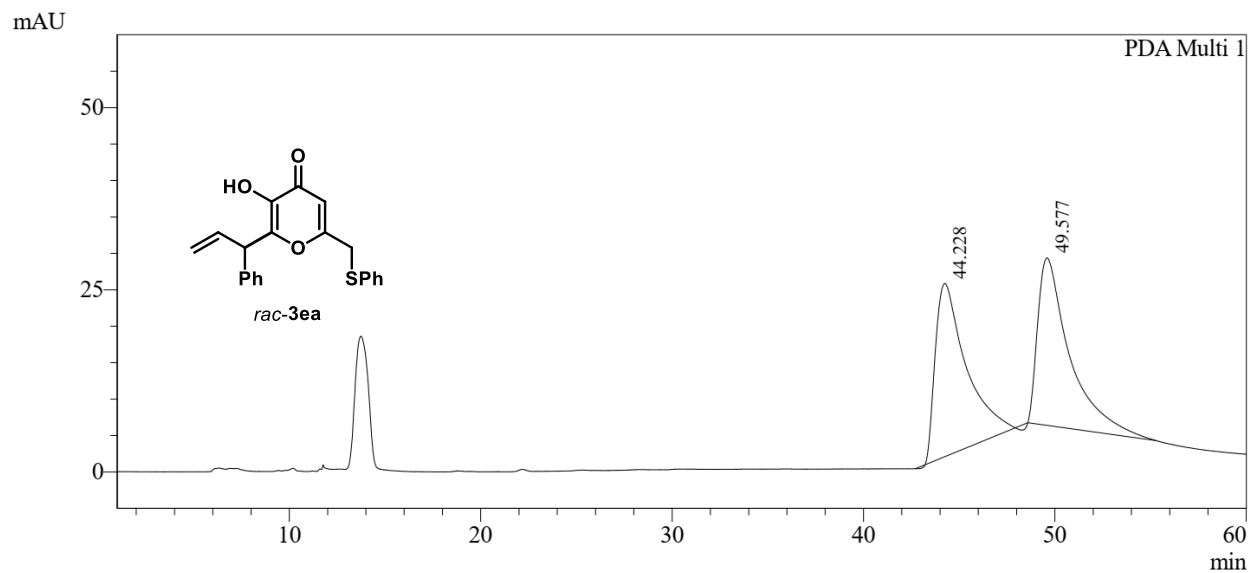

PeakTable

PDA Ch1 272nm 4nm

| Peak# | Ret. Time | Area    | Area %  |
|-------|-----------|---------|---------|
| 1     | 44.228    | 2643491 | 49.769  |
| 2     | 49.577    | 2667996 | 50.231  |
| Total |           | 5311487 | 100.000 |

Daicel Chiralpak IH column (90:10 *n*-Hexane/*i*-PrOH, 0.5 mL/min, 20 °C)

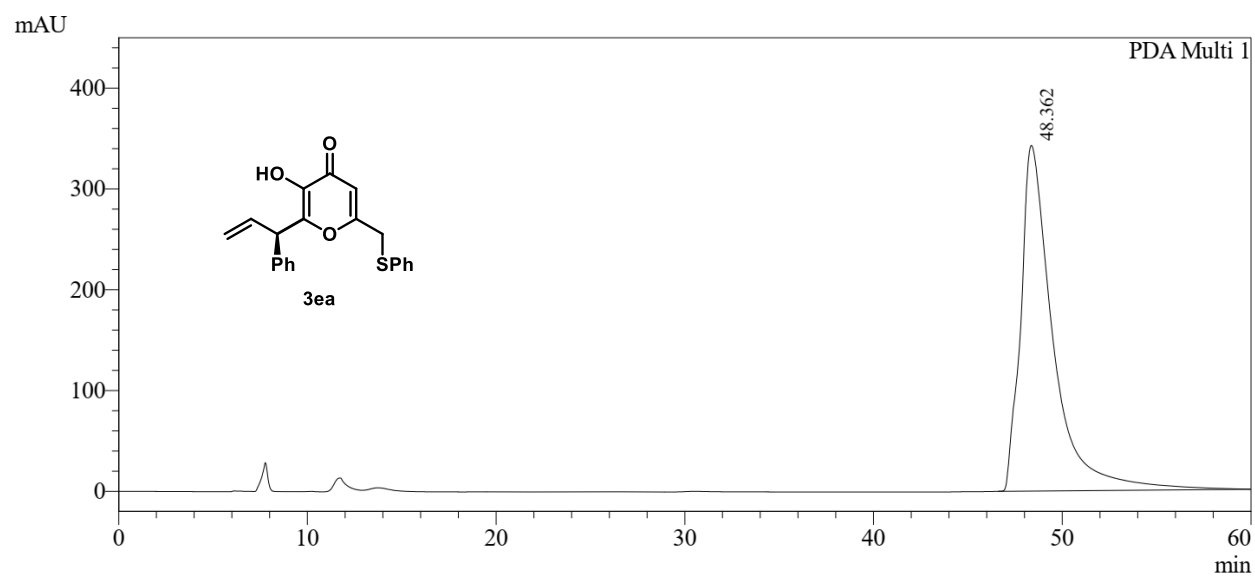

PeakTable

PDA Ch1 272nm 4nm

| Peak# | Ret. Time | Area     | Area %  |
|-------|-----------|----------|---------|
| 1     | 48.362    | 40998998 | 100.000 |
| Total |           | 40998998 | 100.000 |



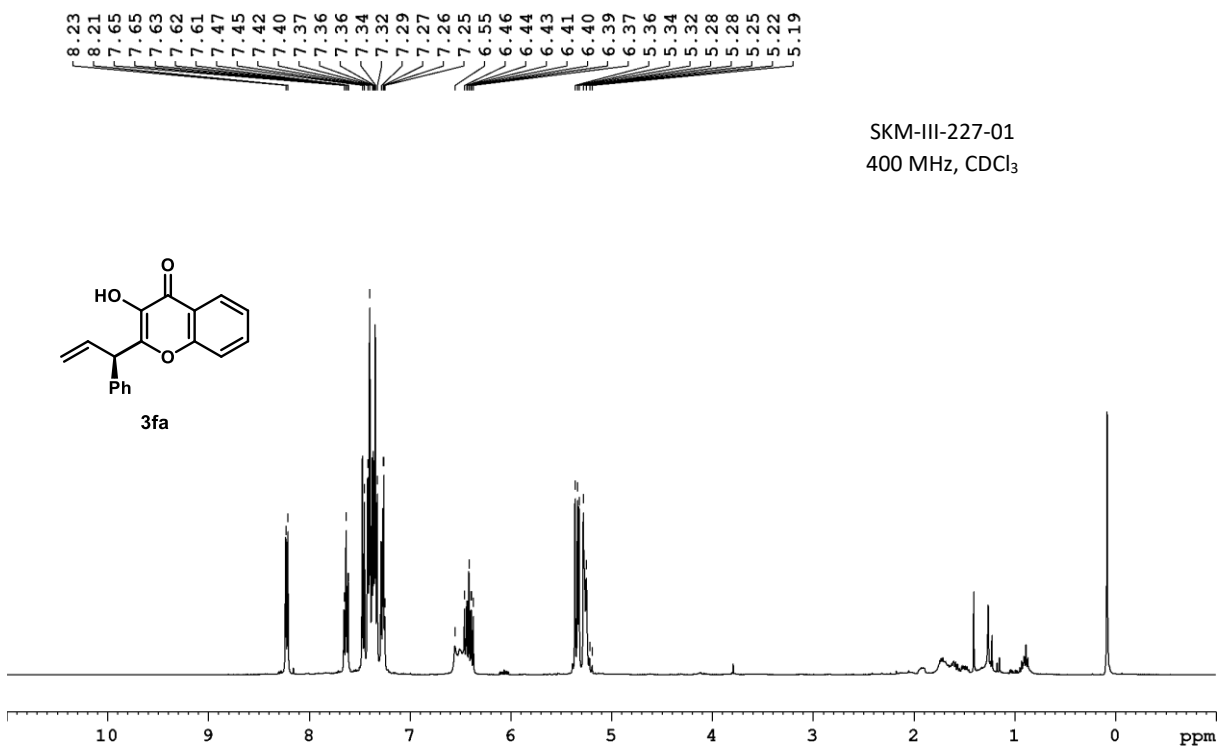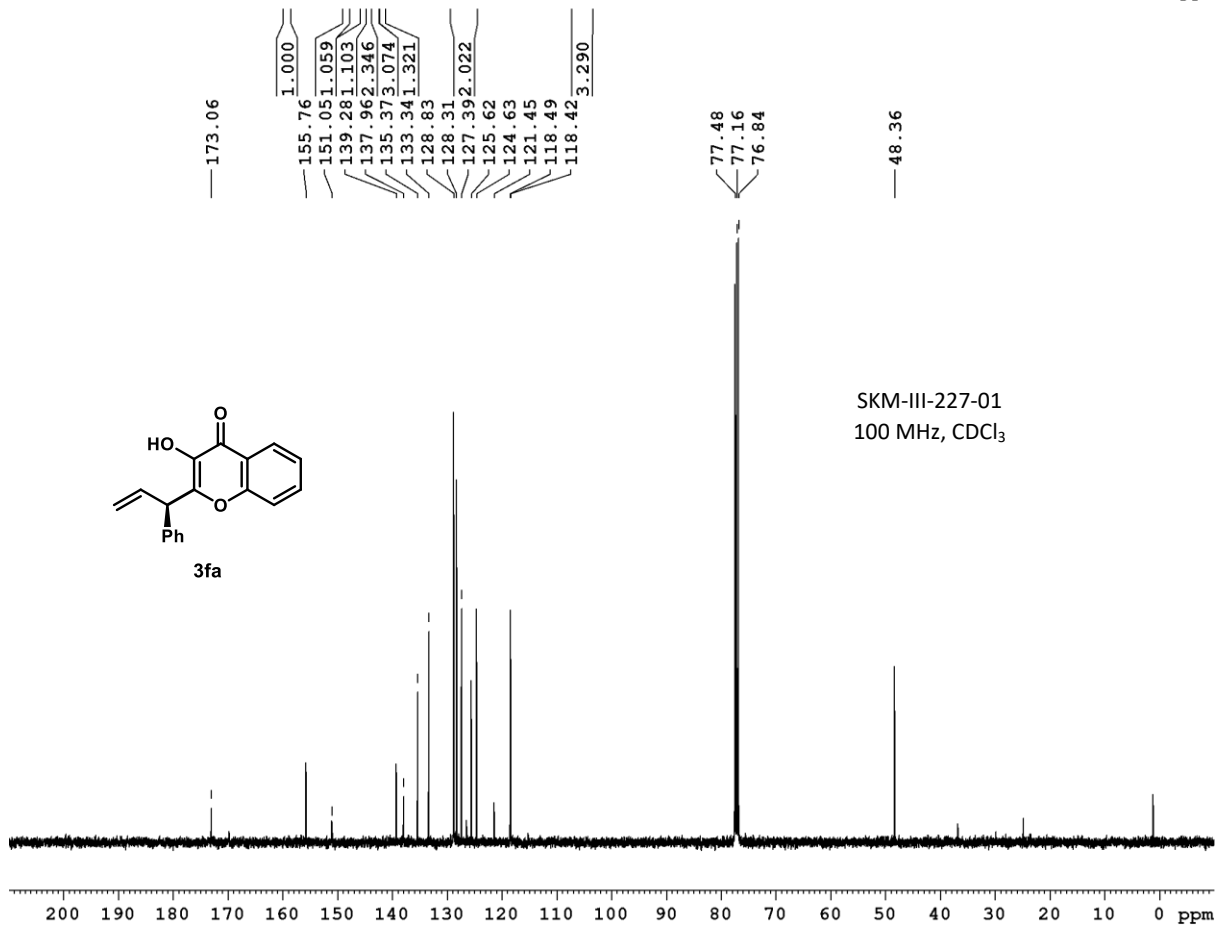

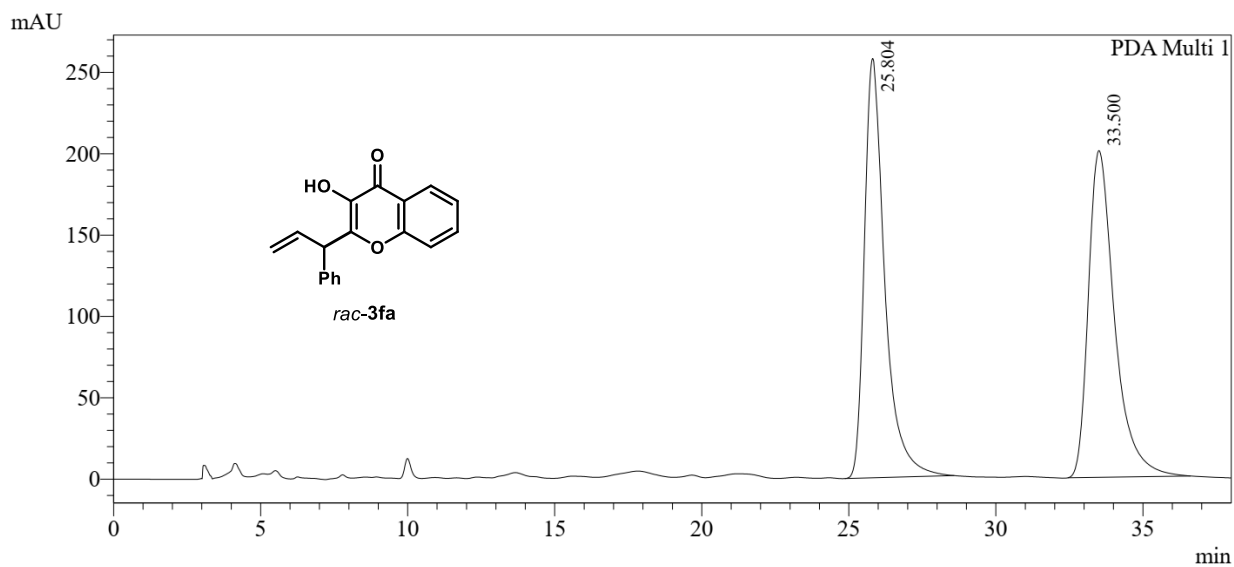

PeakTable

PDA Ch1 233nm 4nm

| Peak# | Ret. Time | Area     | Area %  |
|-------|-----------|----------|---------|
| 1     | 25.804    | 12421526 | 50.005  |
| 2     | 33.500    | 12418942 | 49.995  |
| Total |           | 24840468 | 100.000 |

Daicel Chiralpak IG column (95:5 *n*-Hexane/*i*-PrOH, 1 mL/min, 20 °C)

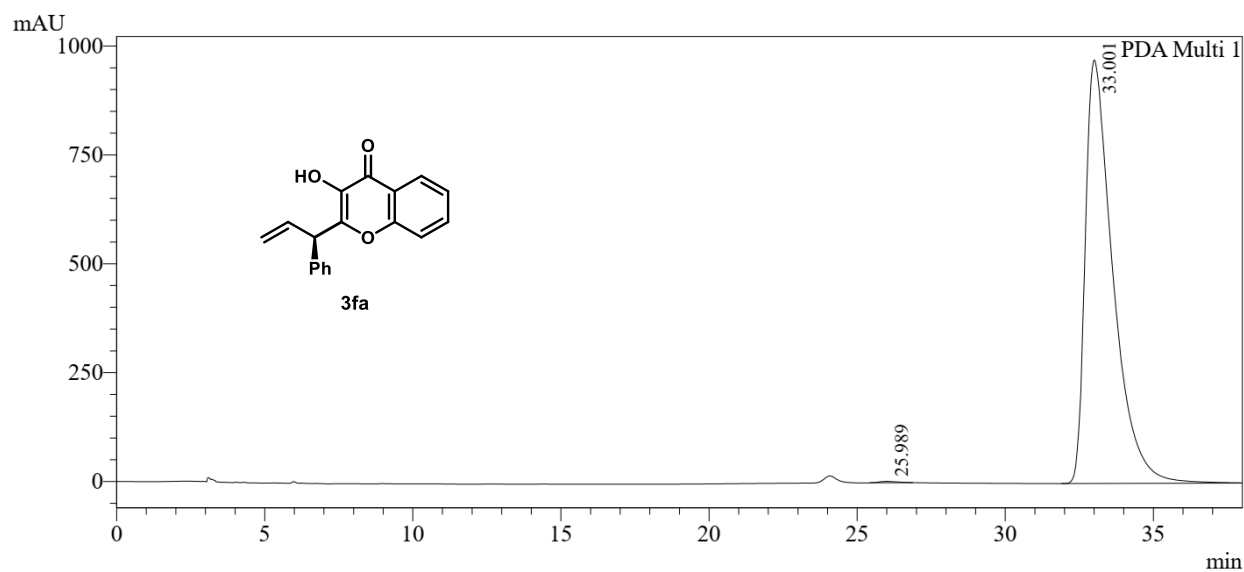

PeakTable

PDA Ch1 233nm 4nm

| Peak# | Ret. Time | Area     | Area %  |
|-------|-----------|----------|---------|
| 1     | 25.989    | 132196   | 0.209   |
| 2     | 33.001    | 63141661 | 99.791  |
| Total |           | 63273857 | 100.000 |

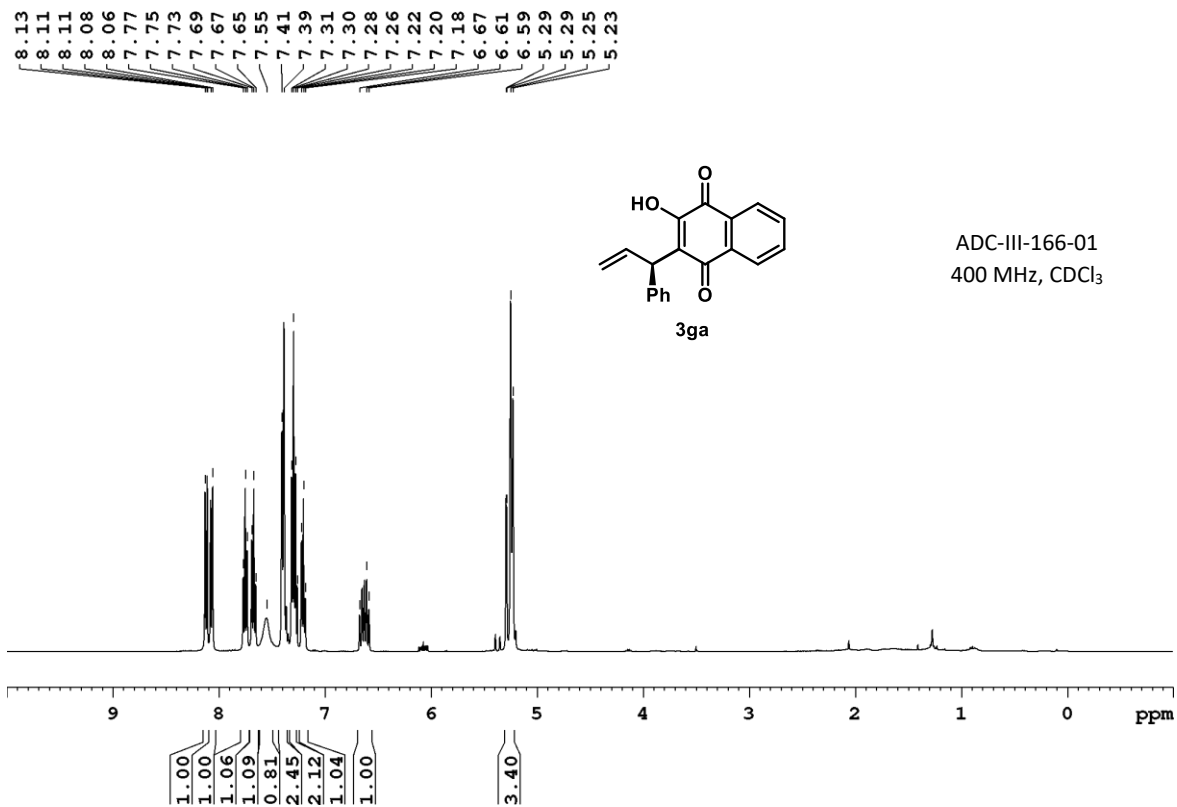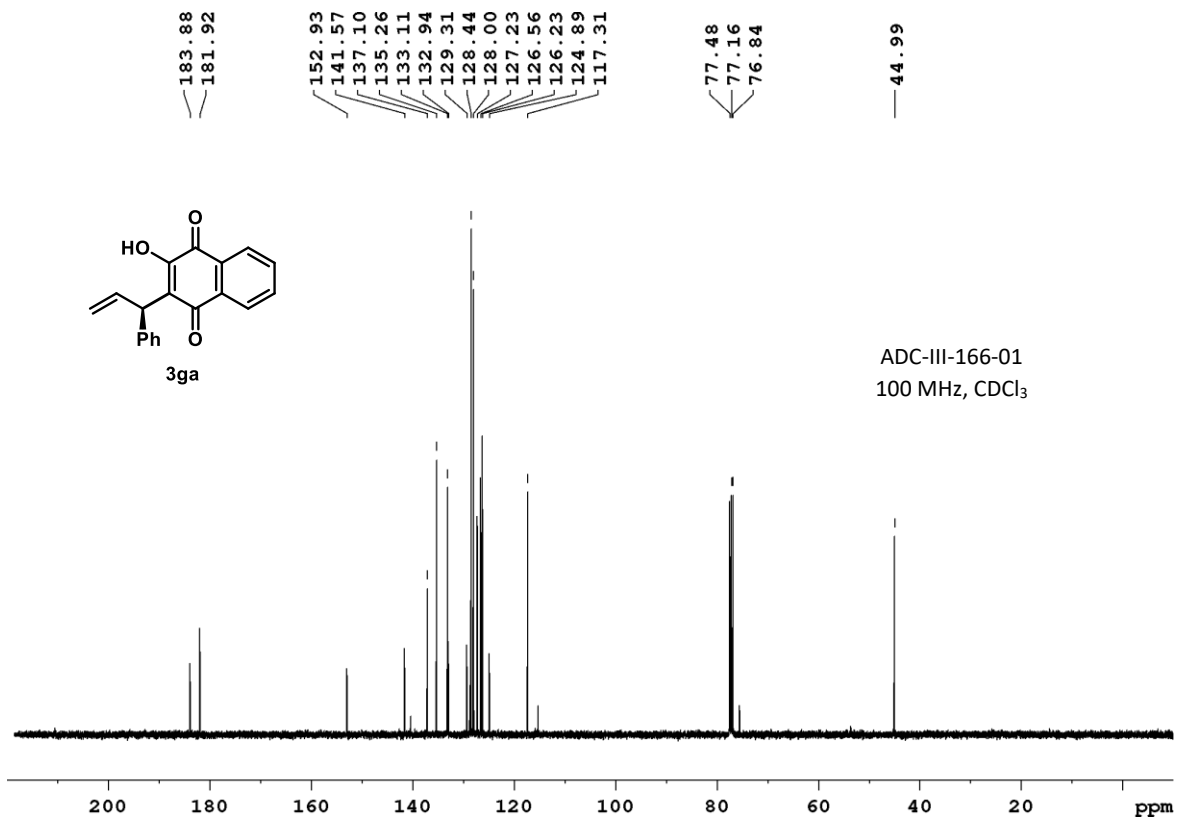

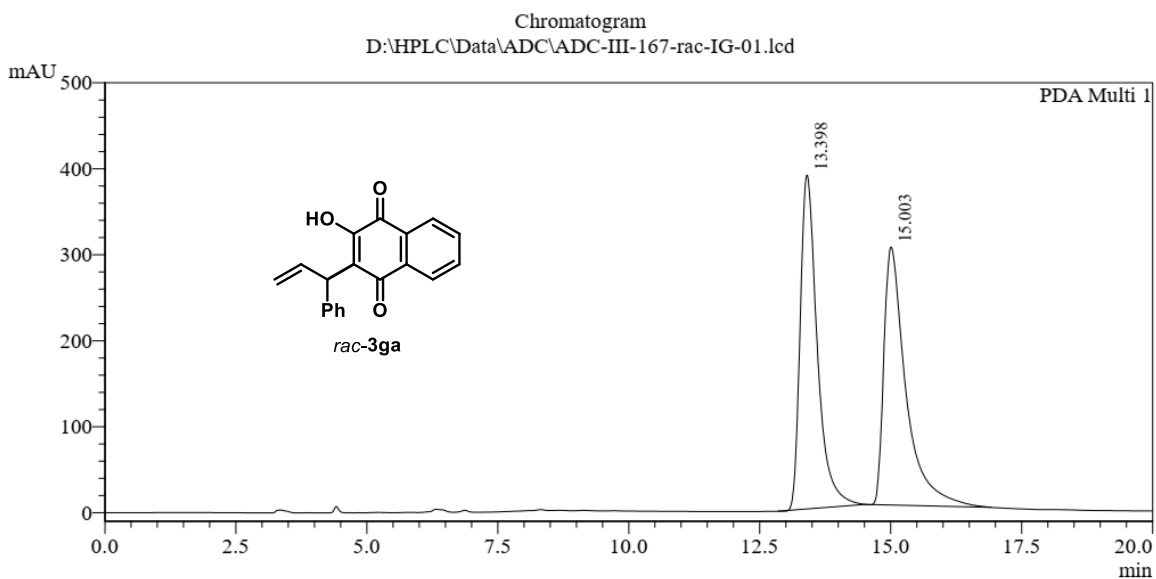

PeakTable

PDA Ch1 232nm 4nm

| Peak# | Ret. Time | Area     | Area %  |
|-------|-----------|----------|---------|
| 1     | 13.398    | 8806755  | 50.008  |
| 2     | 15.003    | 8803947  | 49.992  |
| Total |           | 17610702 | 100.000 |

Daicel Chiralpak IG column (90:10 *n*-Hexane/*i*-PrOH, 1.0 mL/min, 20 °C)

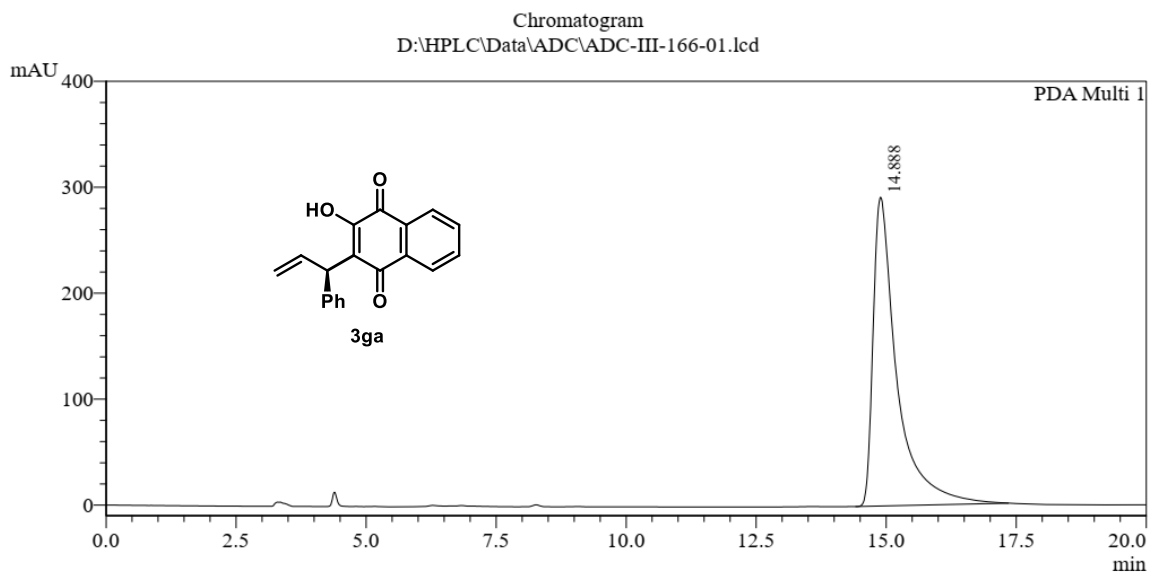

PeakTable

PDA Ch1 232nm 4nm

| Peak# | Ret. Time | Area    | Area %  |
|-------|-----------|---------|---------|
| 1     | 14.888    | 9263135 | 100.000 |
| Total |           | 9263135 | 100.000 |

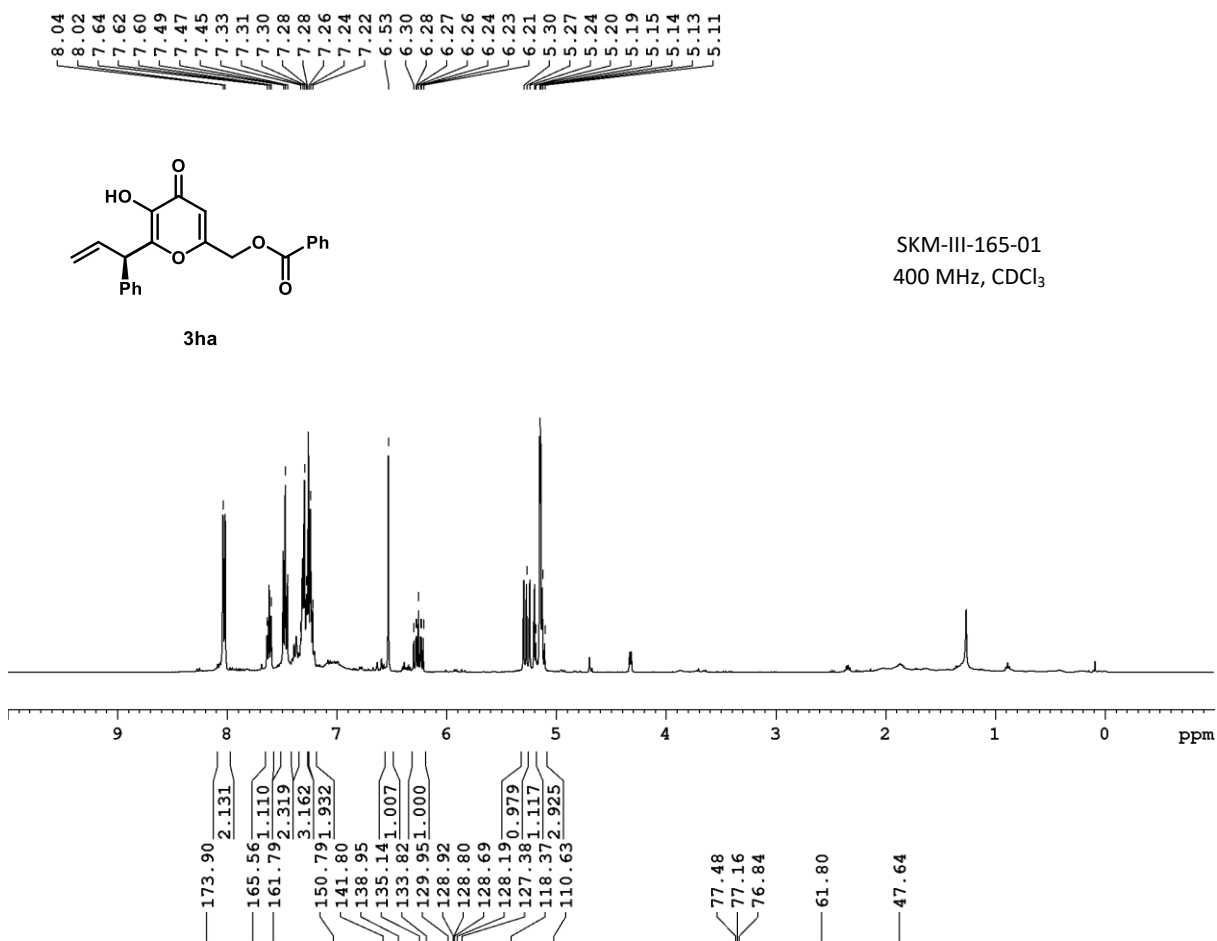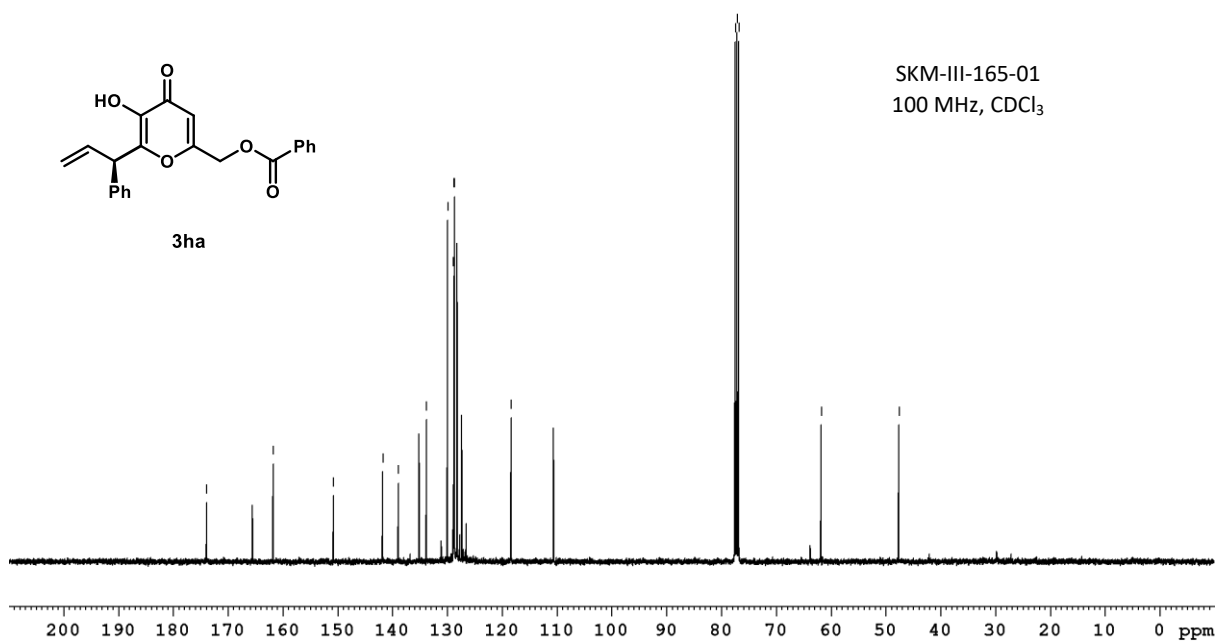

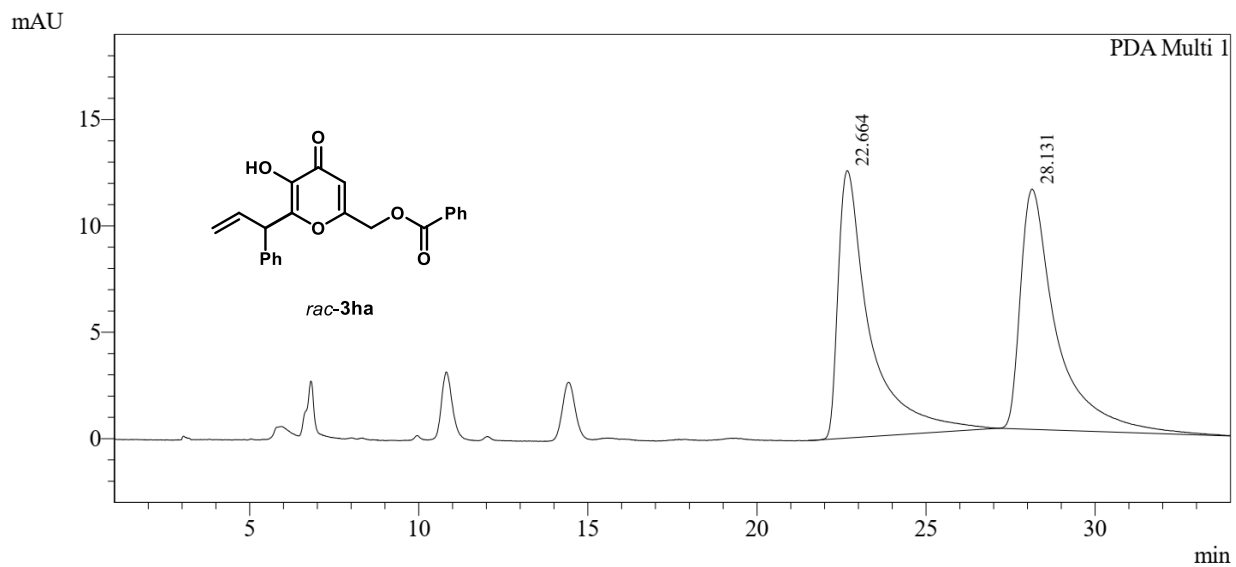

PeakTable

PDA Ch1 298nm 4nm

| Peak# | Ret. Time | Area    | Area %  |
|-------|-----------|---------|---------|
| 1     | 22.664    | 820498  | 49.374  |
| 2     | 28.131    | 841299  | 50.626  |
| Total |           | 1661797 | 100.000 |

Daicel Chiralpak IH column (85:15 *n*-Hexane/*i*-PrOH, 1 mL/min, 20 °C)

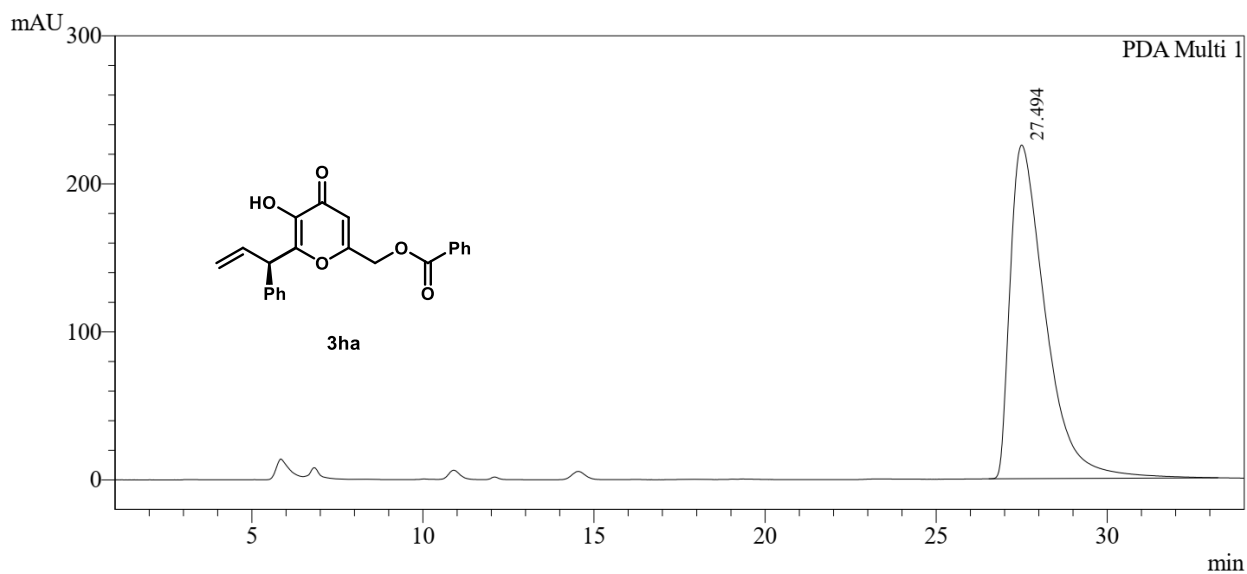

PeakTable

PDA Ch1 298nm 4nm

| Peak# | Ret. Time | Area     | Area %  |
|-------|-----------|----------|---------|
| 1     | 27.494    | 16145576 | 100.000 |
| Total |           | 16145576 | 100.000 |

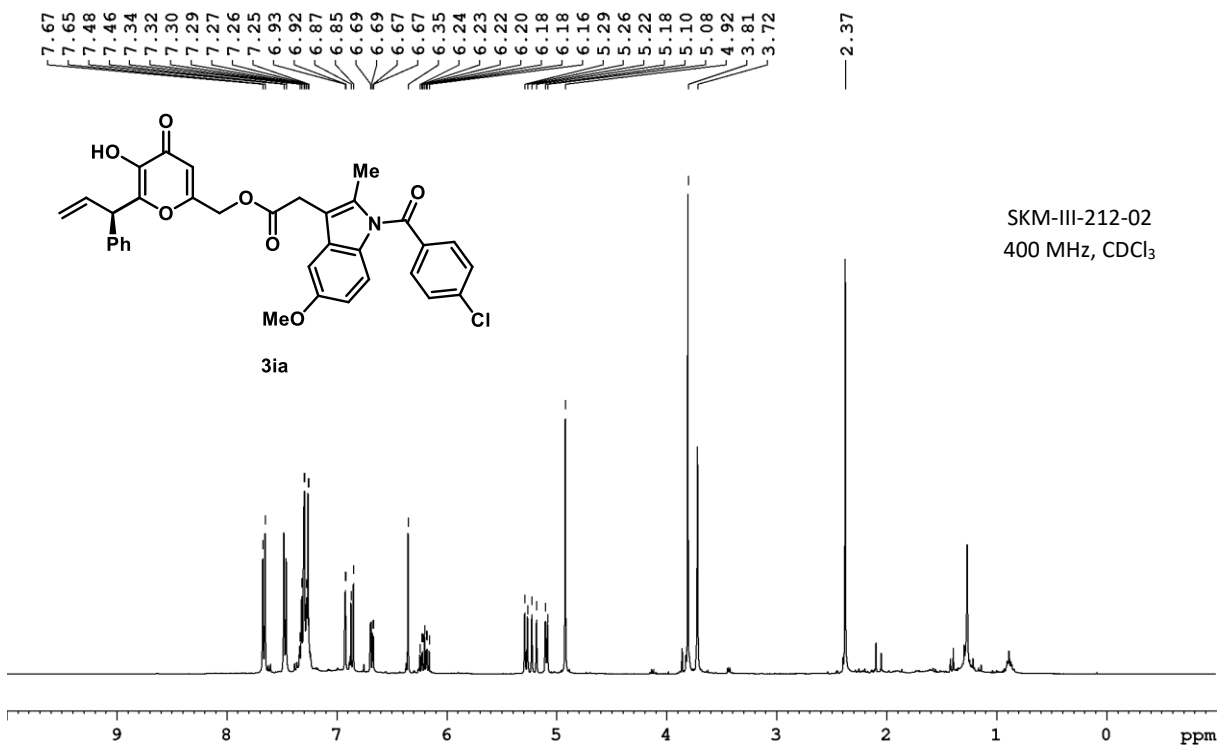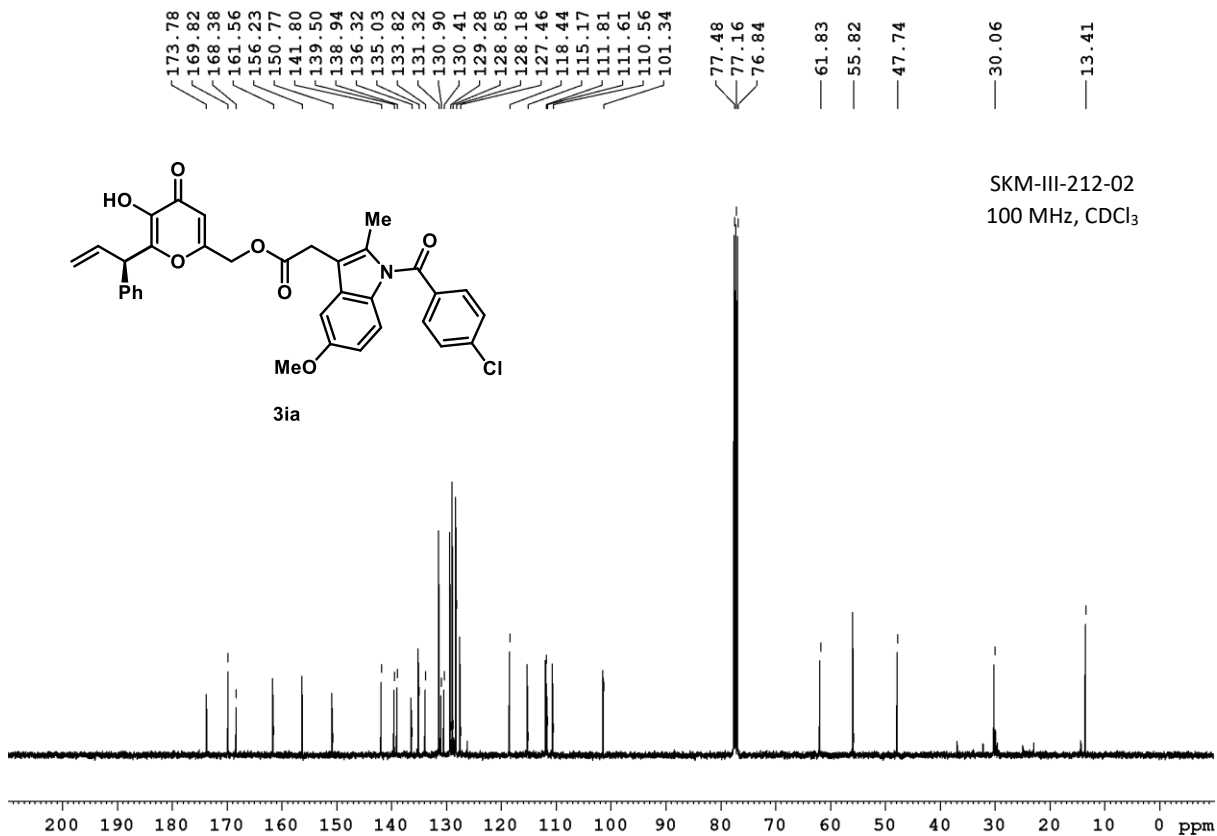

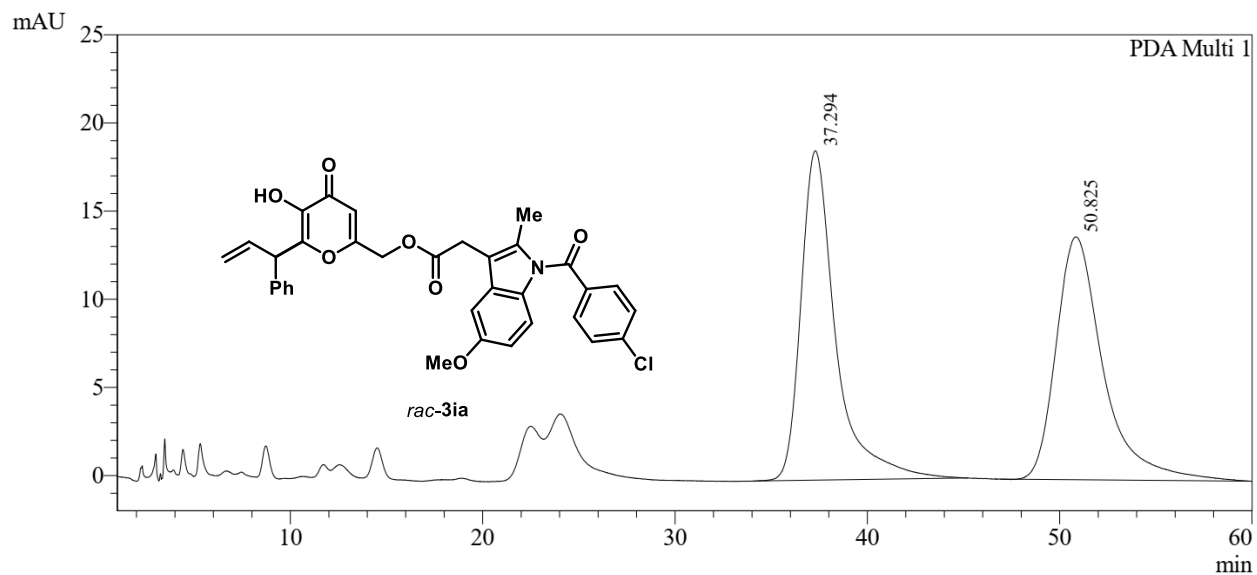

PeakTable

PDA Ch1 268nm 4nm

| Peak# | Ret. Time | Area    | Area %  |
|-------|-----------|---------|---------|
| 1     | 37.294    | 2349354 | 50.040  |
| 2     | 50.825    | 2345638 | 49.960  |
| Total |           | 4694992 | 100.000 |

Daicel Chiralpak IG column (40:60 *n*-Hexane/EtOH, 1.0 mL/min, 20 °C)

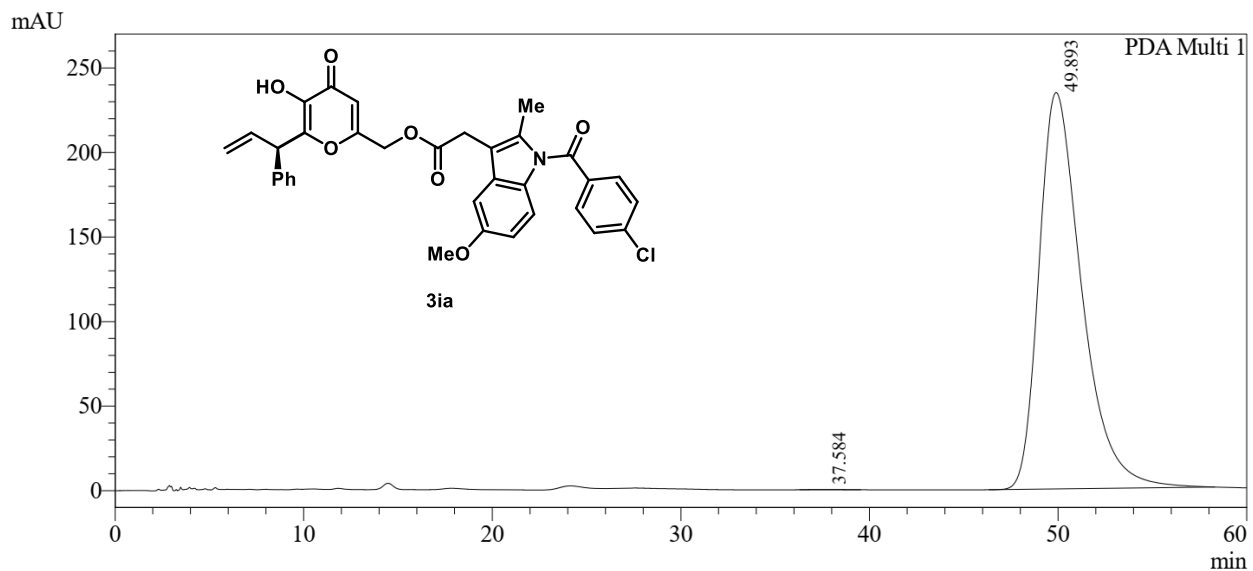

PeakTable

PDA Ch1 268nm 4nm

| Peak# | Ret. Time | Area     | Area %  |
|-------|-----------|----------|---------|
| 1     | 37.584    | 15292    | 0.041   |
| 2     | 49.893    | 37000103 | 99.959  |
| Total |           | 37015395 | 100.000 |



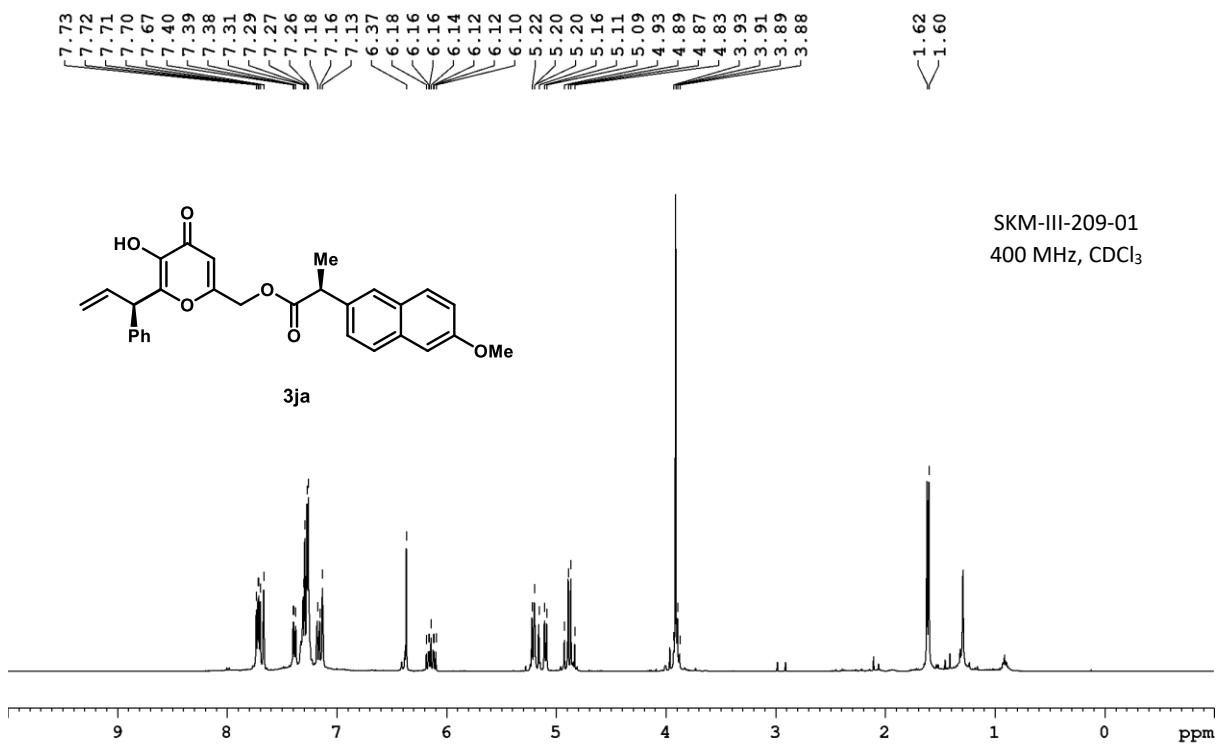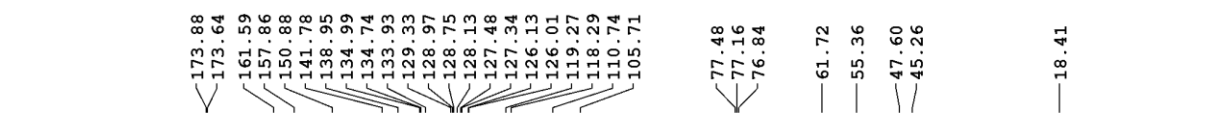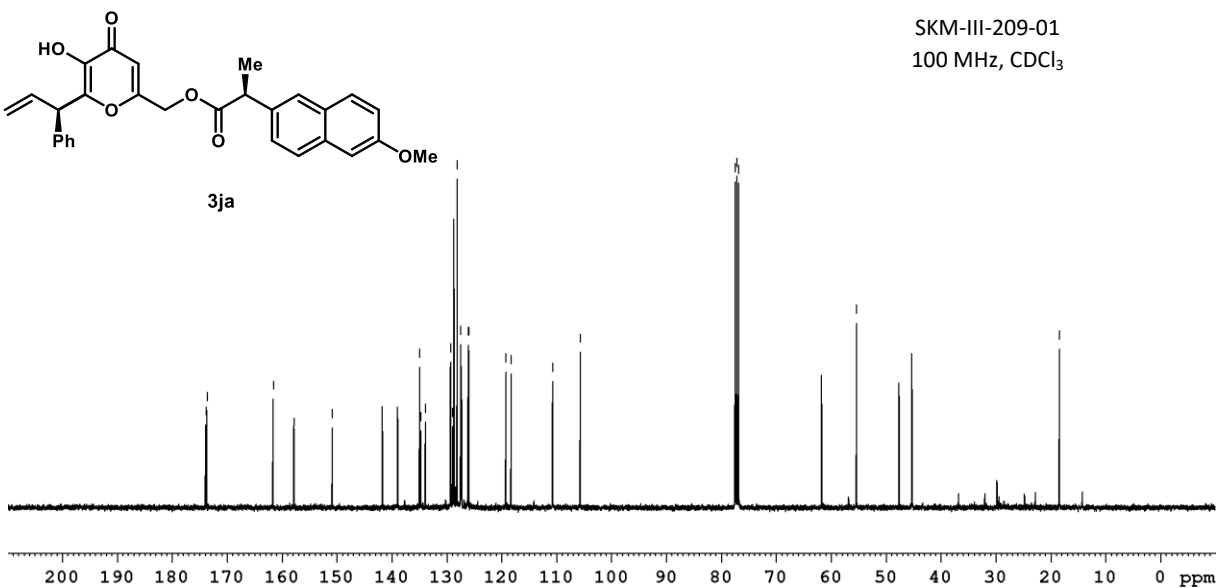

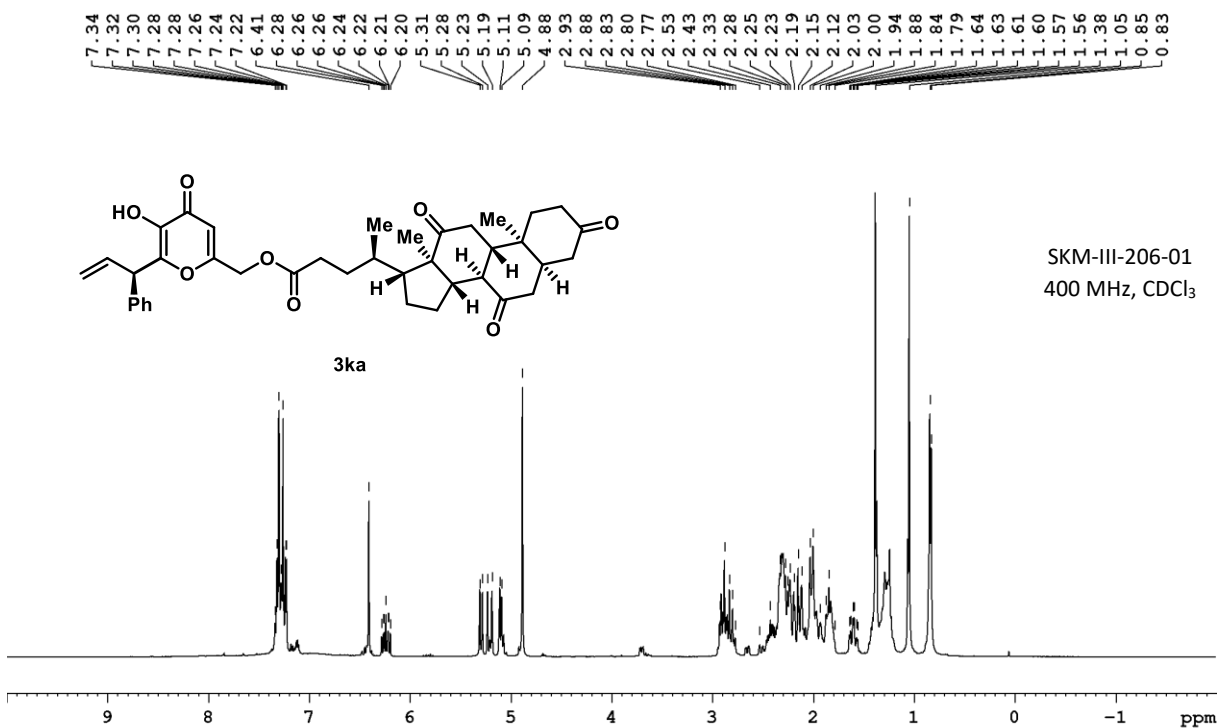

SKM-III-206-01  
400 MHz, CDCl<sub>3</sub>

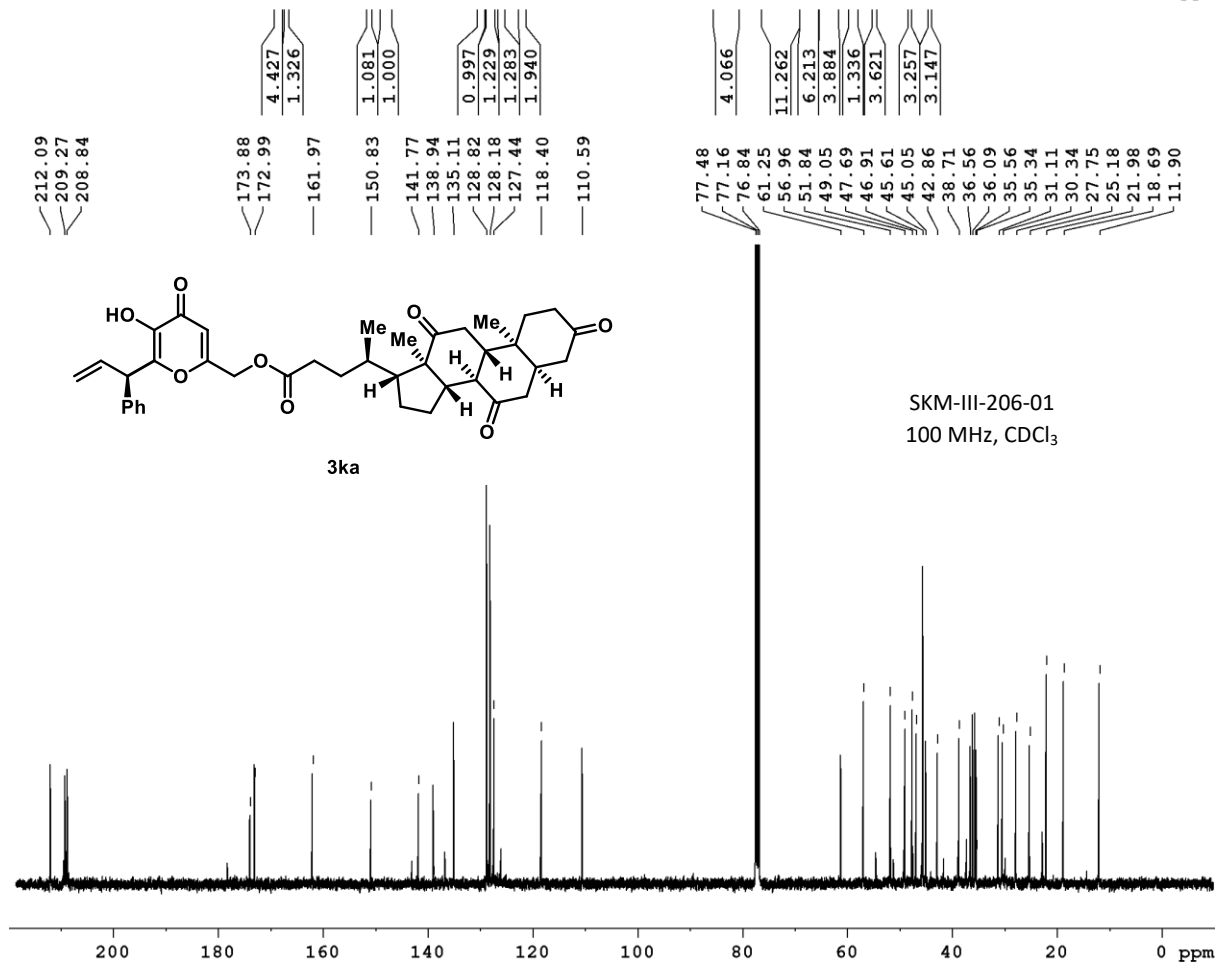

SKM-III-206-01  
100 MHz, CDCl<sub>3</sub>

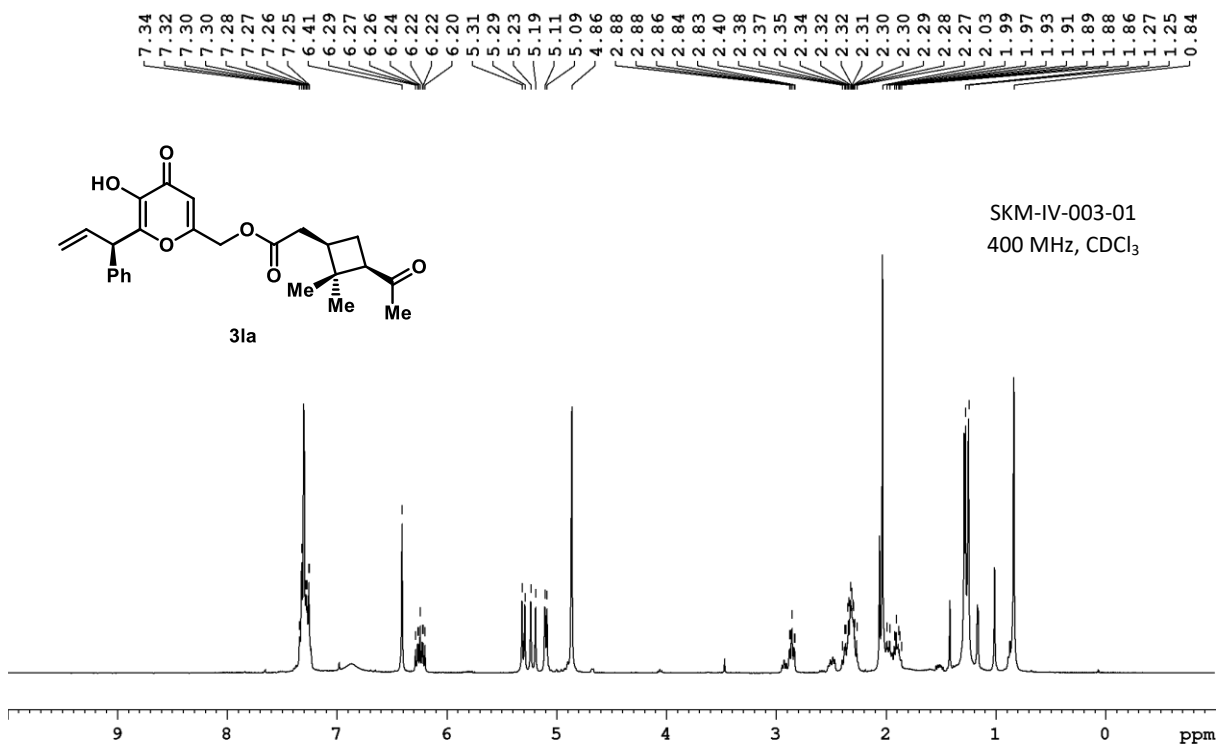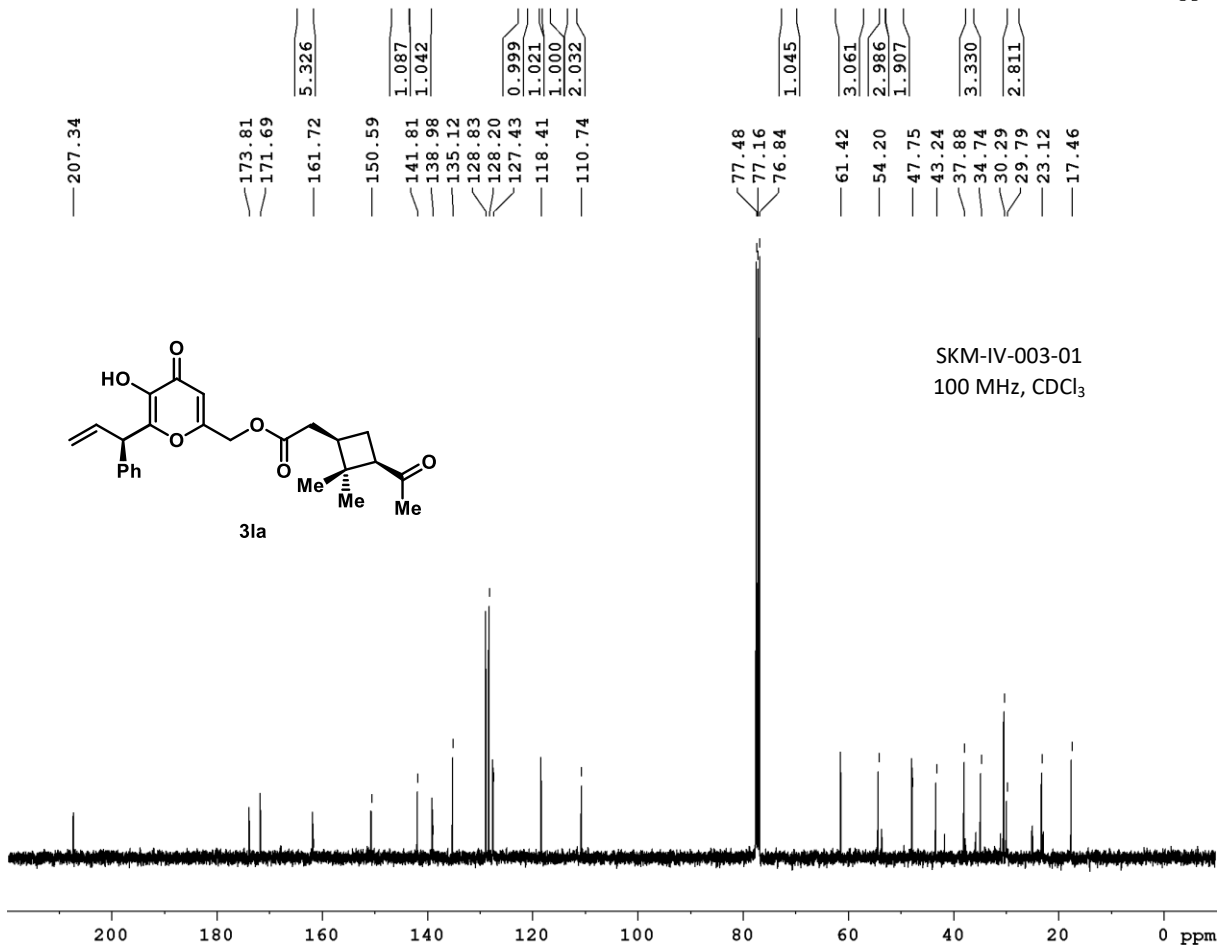

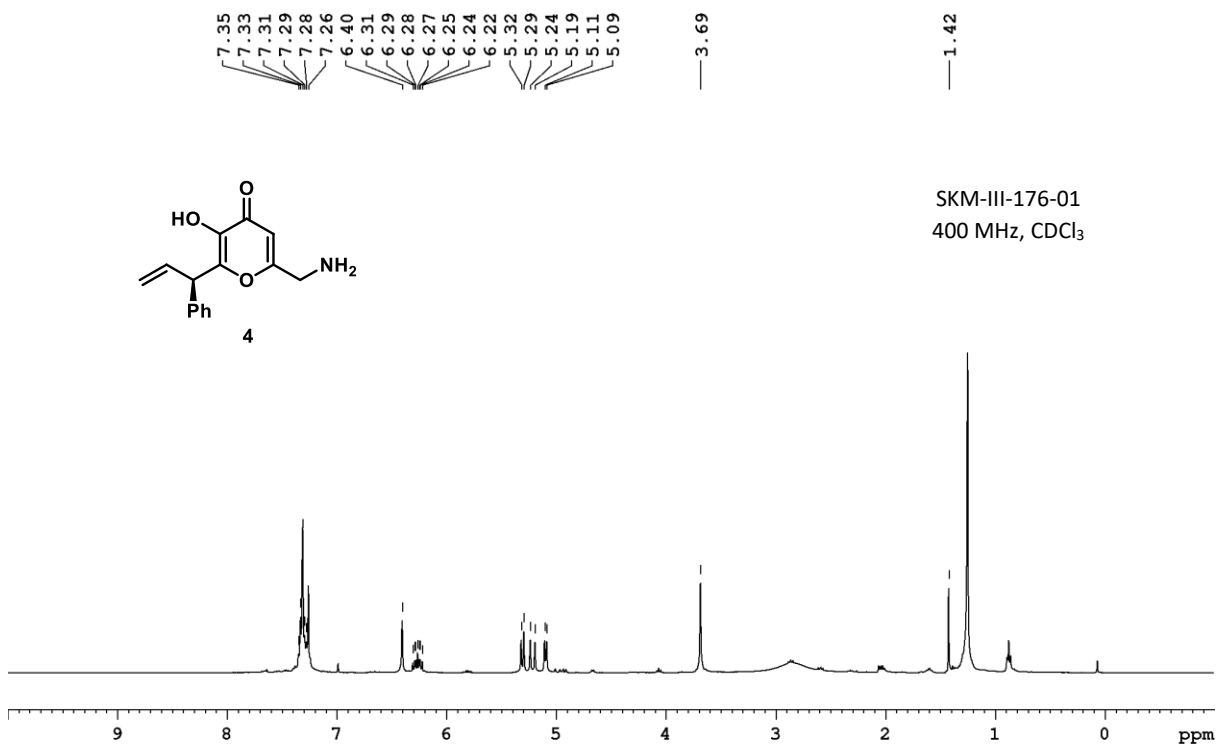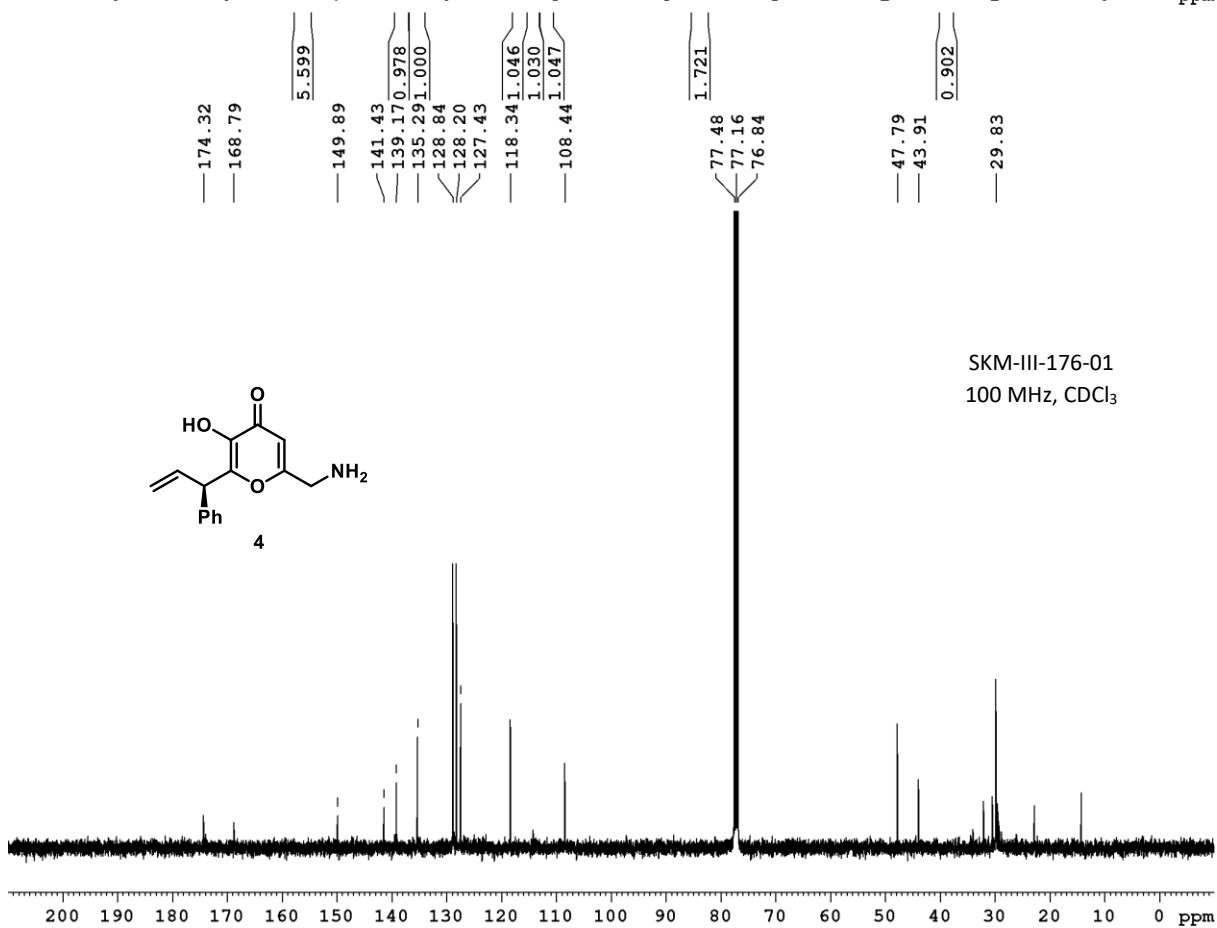

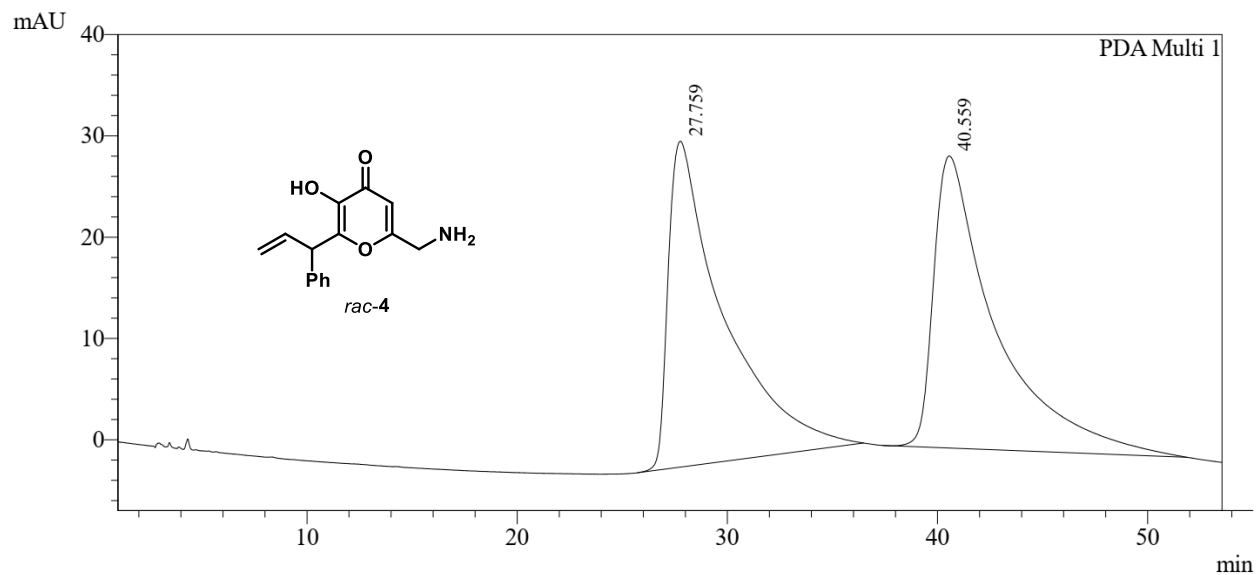

PeakTable

PDA Ch1 280nm 4nm

| Peak# | Ret. Time | Area     | Area %  |
|-------|-----------|----------|---------|
| 1     | 27.759    | 5901396  | 50.050  |
| 2     | 40.559    | 5889578  | 49.950  |
| Total |           | 11790973 | 100.000 |

Phenomenex Cellulose-2 column (70:30 *n*-Hexane/*i*-PrOH, 1.0 mL/min, 20 °C)

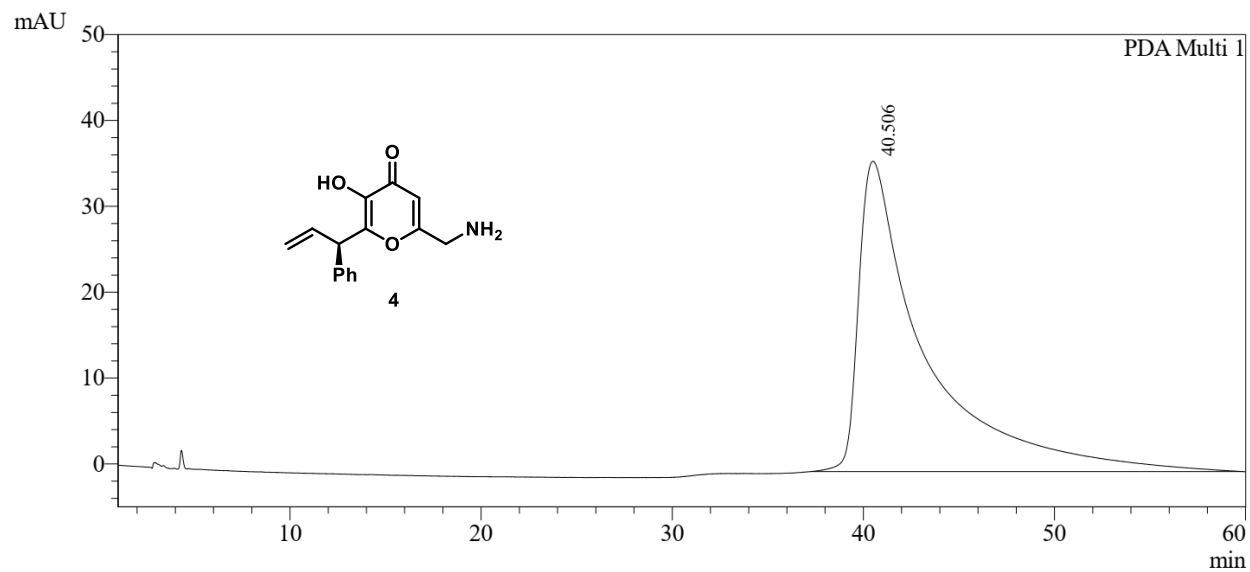

PeakTable

PDA Ch1 280nm 4nm

| Peak# | Ret. Time | Area    | Area %  |
|-------|-----------|---------|---------|
| 1     | 40.506    | 8762993 | 100.000 |
| Total |           | 8762993 | 100.000 |

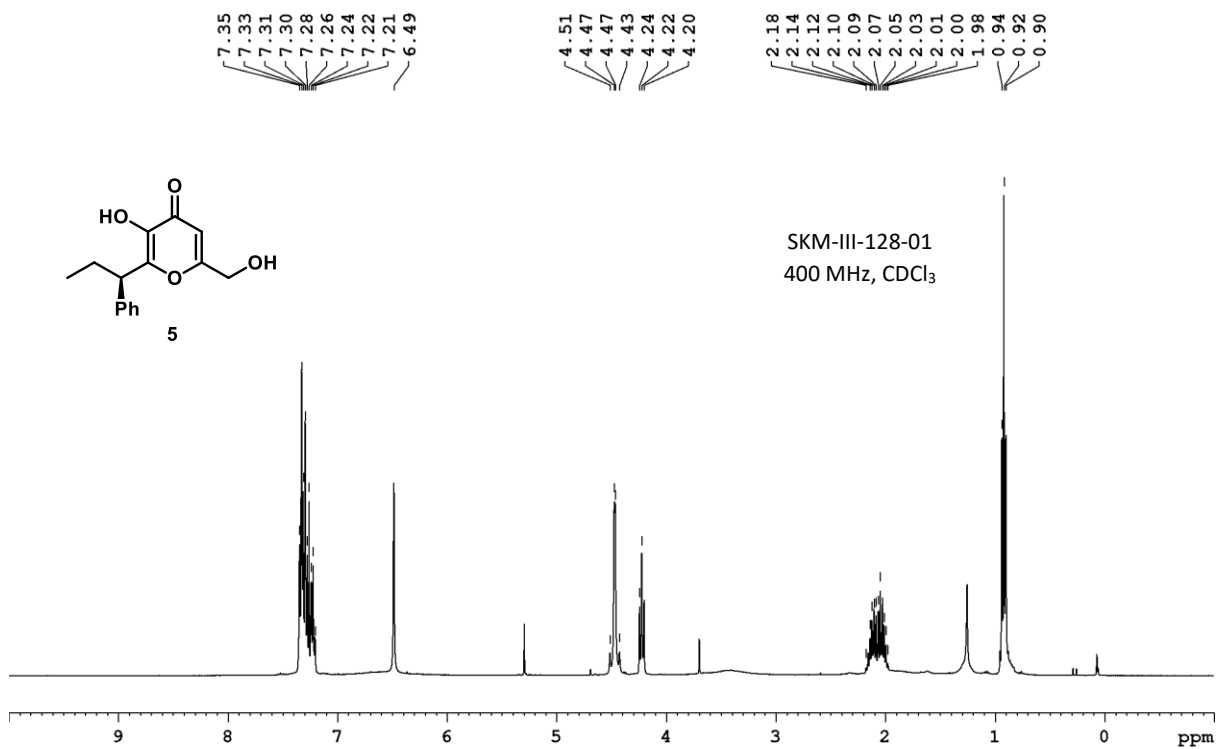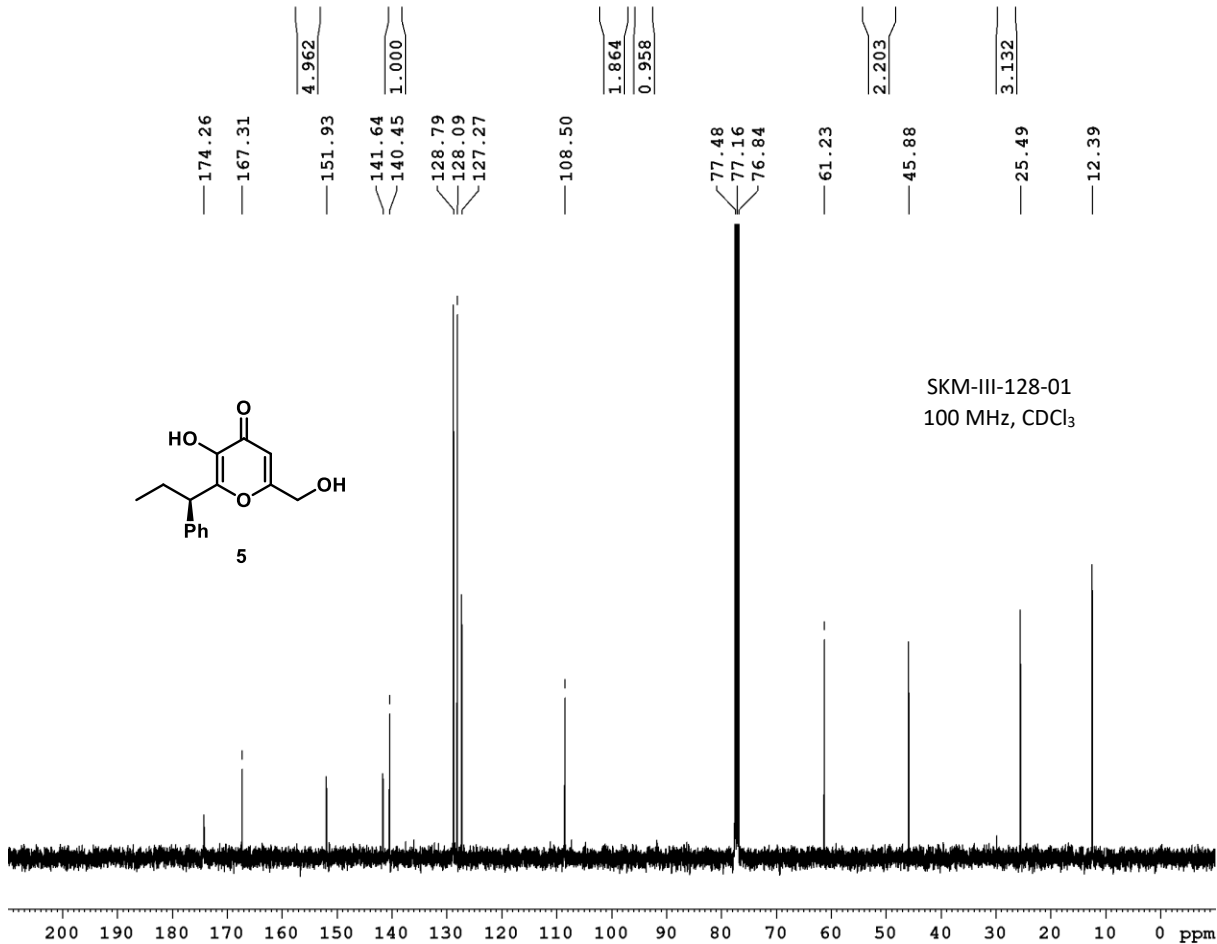

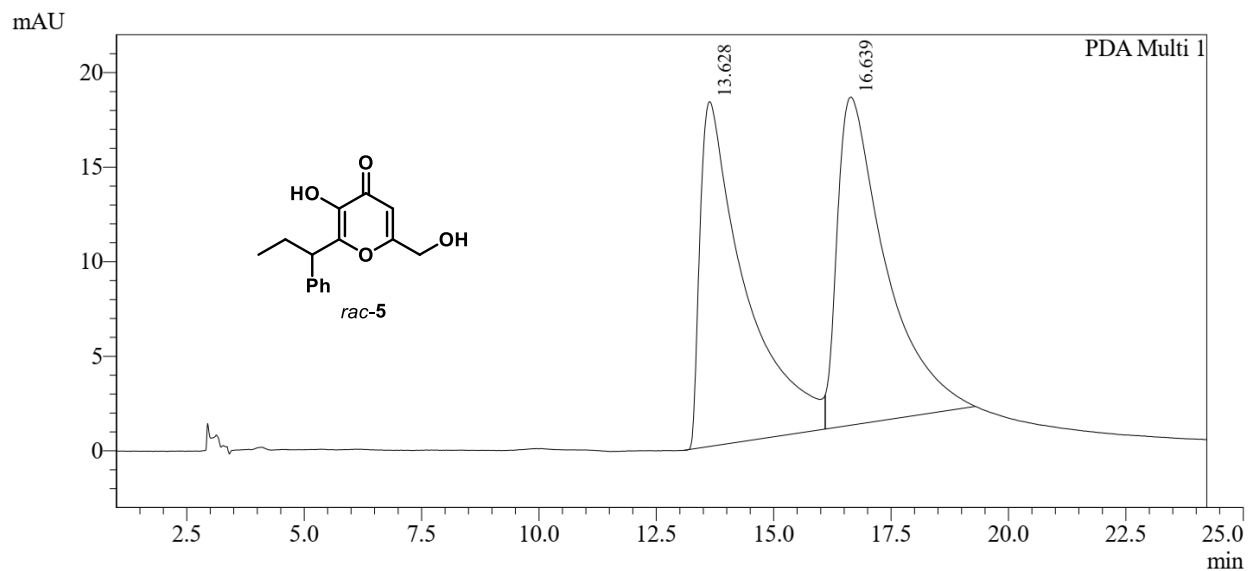

PeakTable

PDA Ch1 277nm 4nm

| Peak# | Ret. Time | Area    | Area %  |
|-------|-----------|---------|---------|
| 1     | 13.628    | 1220477 | 49.572  |
| 2     | 16.639    | 1241534 | 50.428  |
| Total |           | 2462011 | 100.000 |

Daicel Chiralpak AD-H column (90:10 *n*-Hexane/*i*-PrOH, 1.0 mL/min, 20 °C)

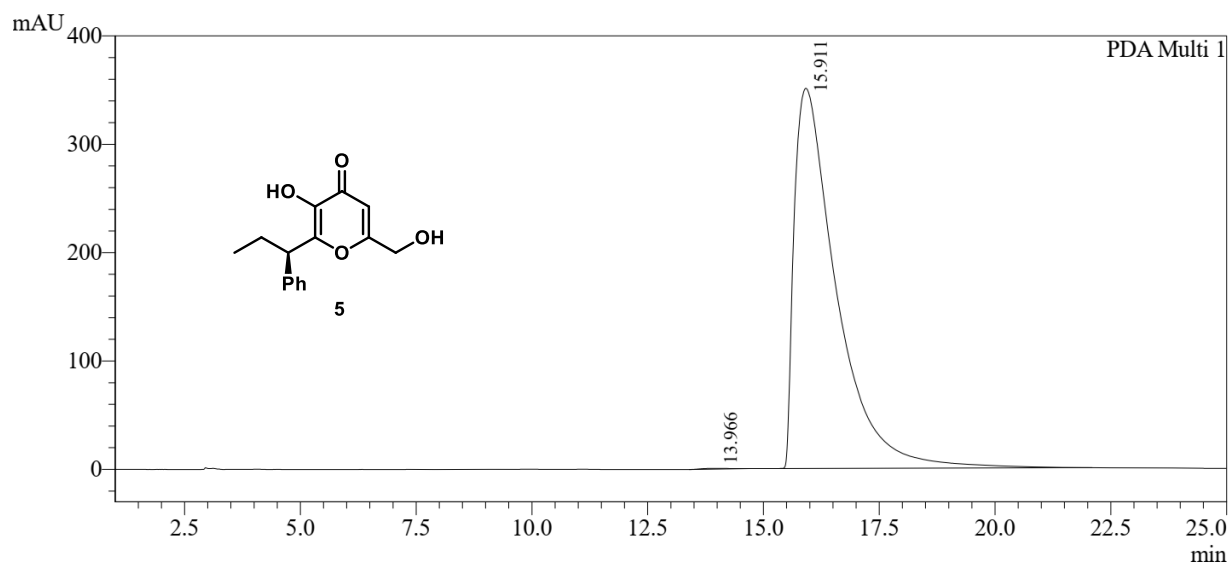

PeakTable

PDA Ch1 277nm 4nm

| Peak# | Ret. Time | Area     | Area %  |
|-------|-----------|----------|---------|
| 1     | 13.966    | 29563    | 0.132   |
| 2     | 15.911    | 22298420 | 99.868  |
| Total |           | 22327983 | 100.000 |

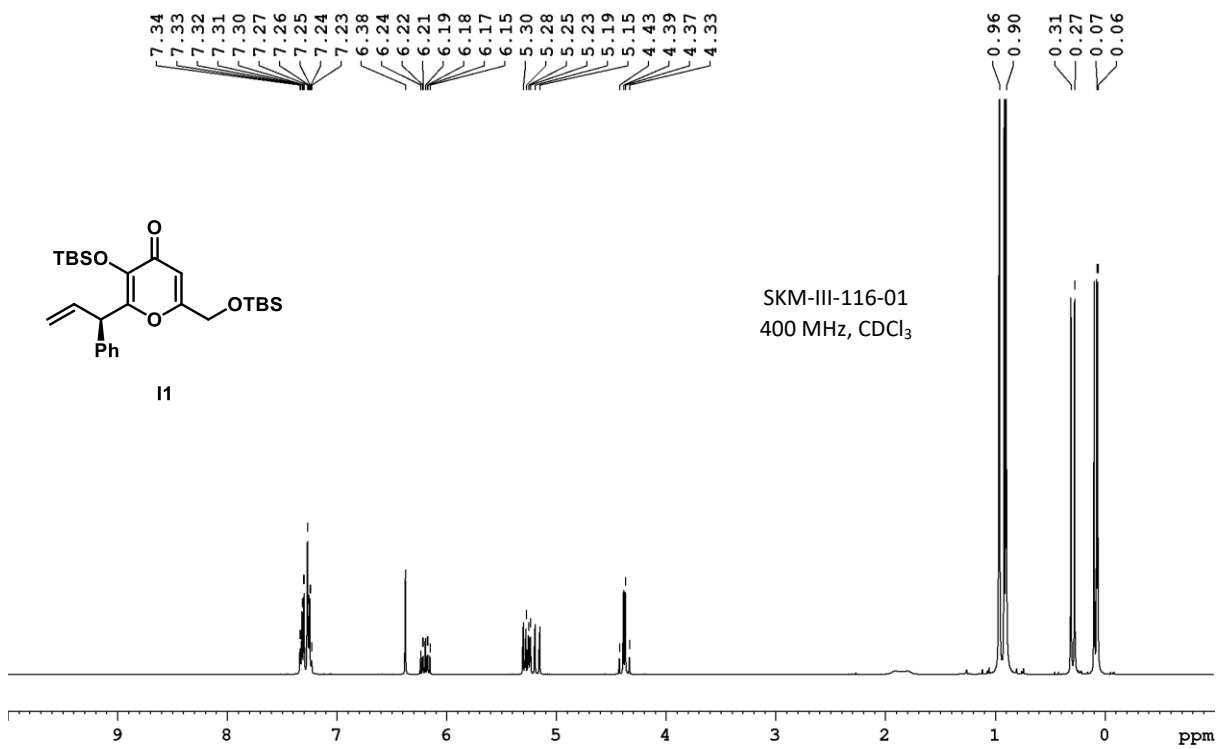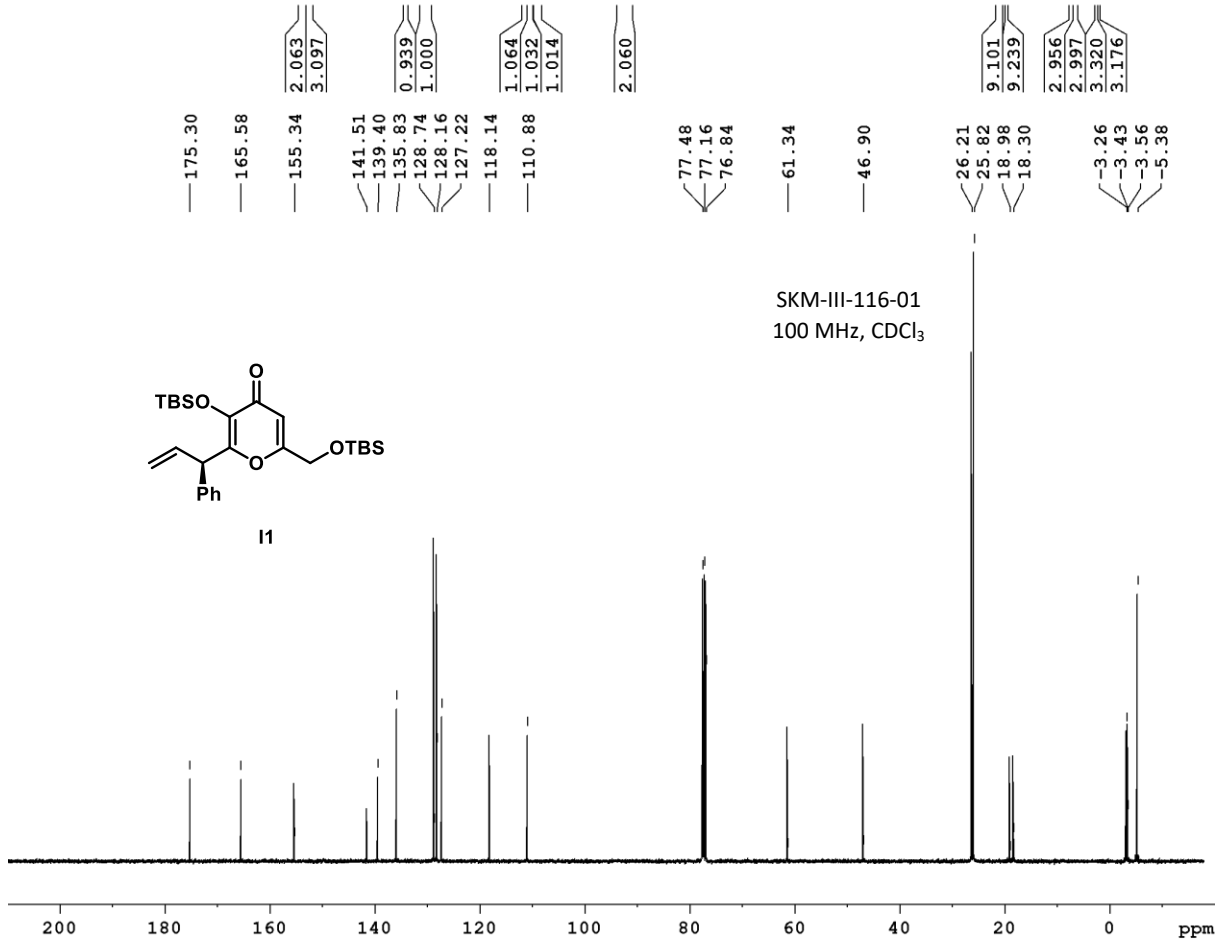



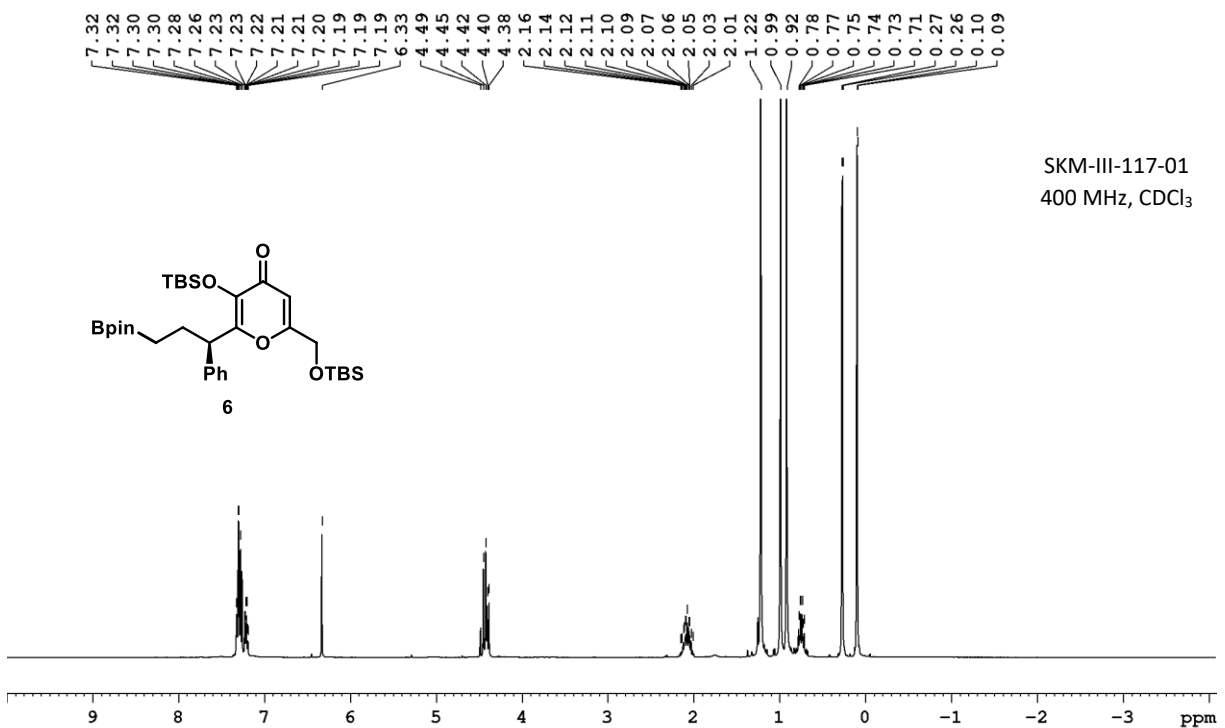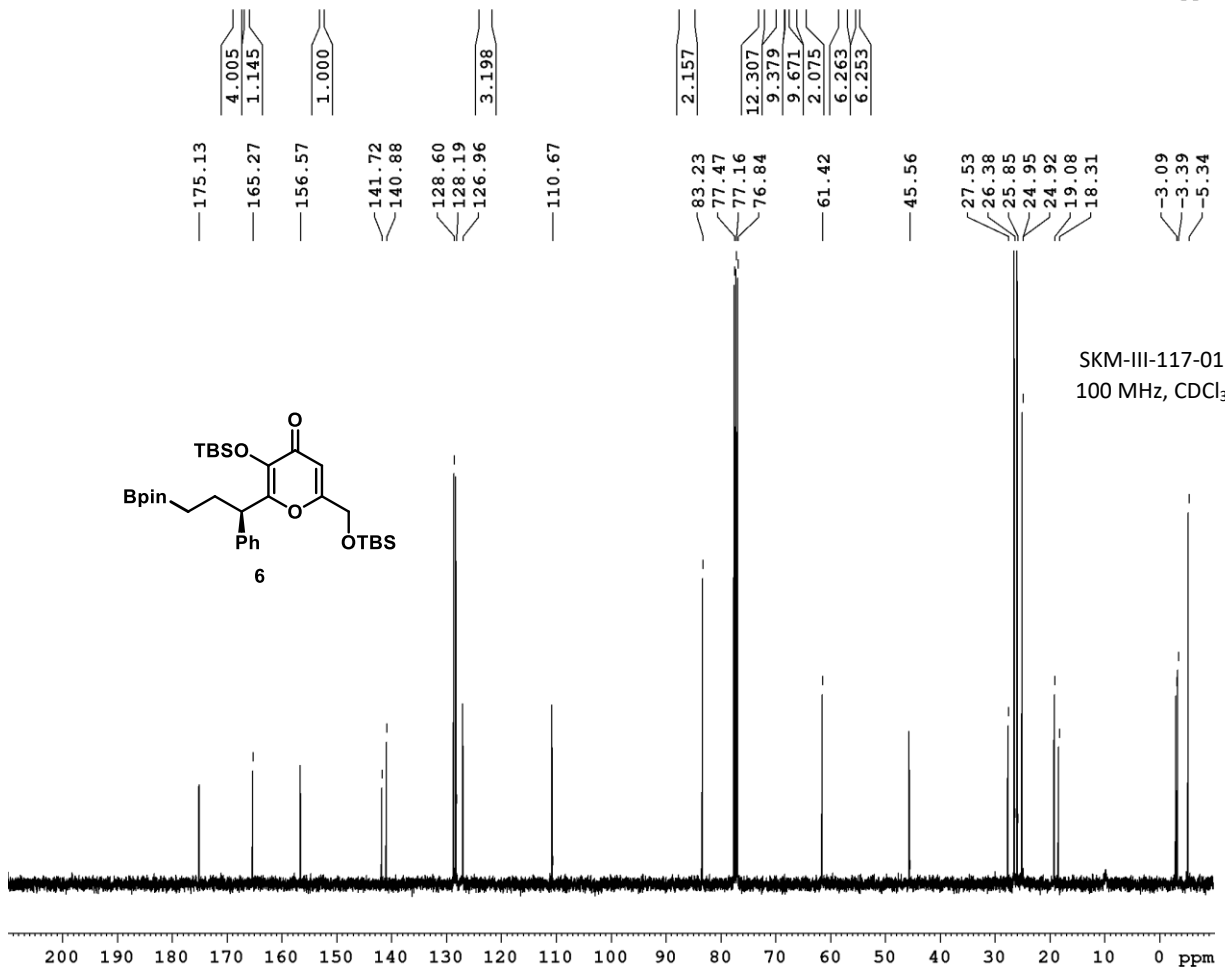

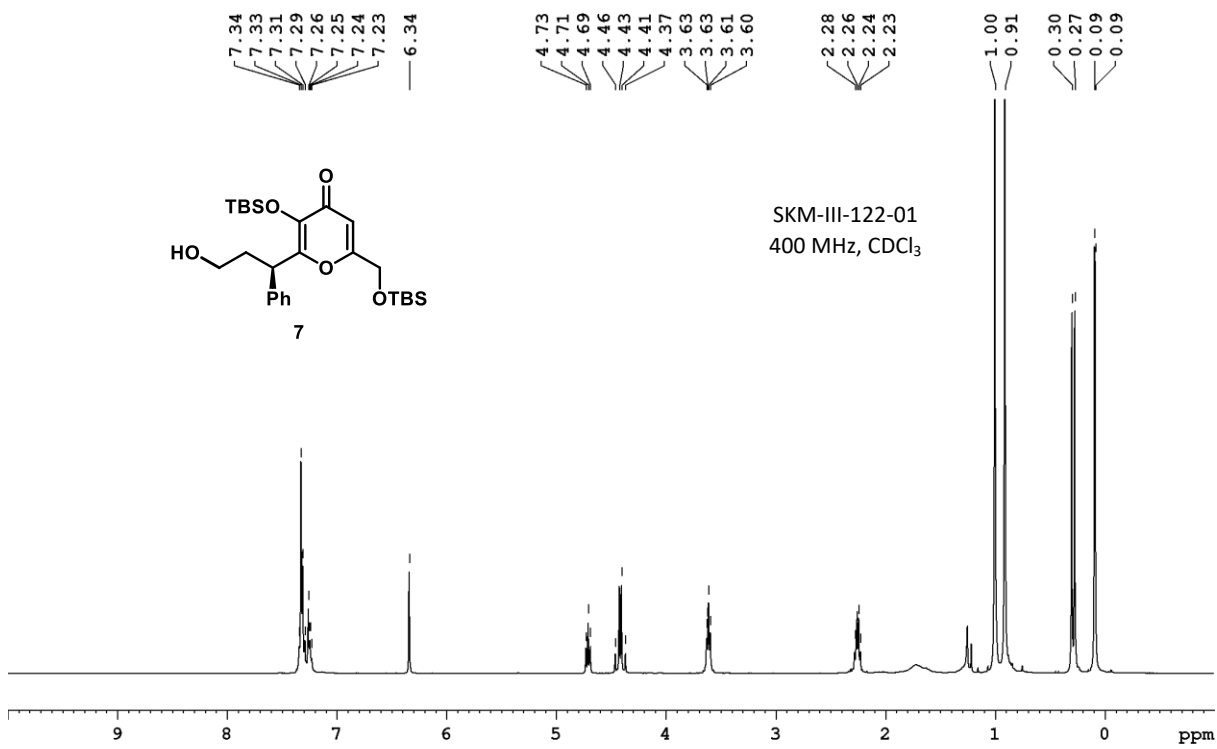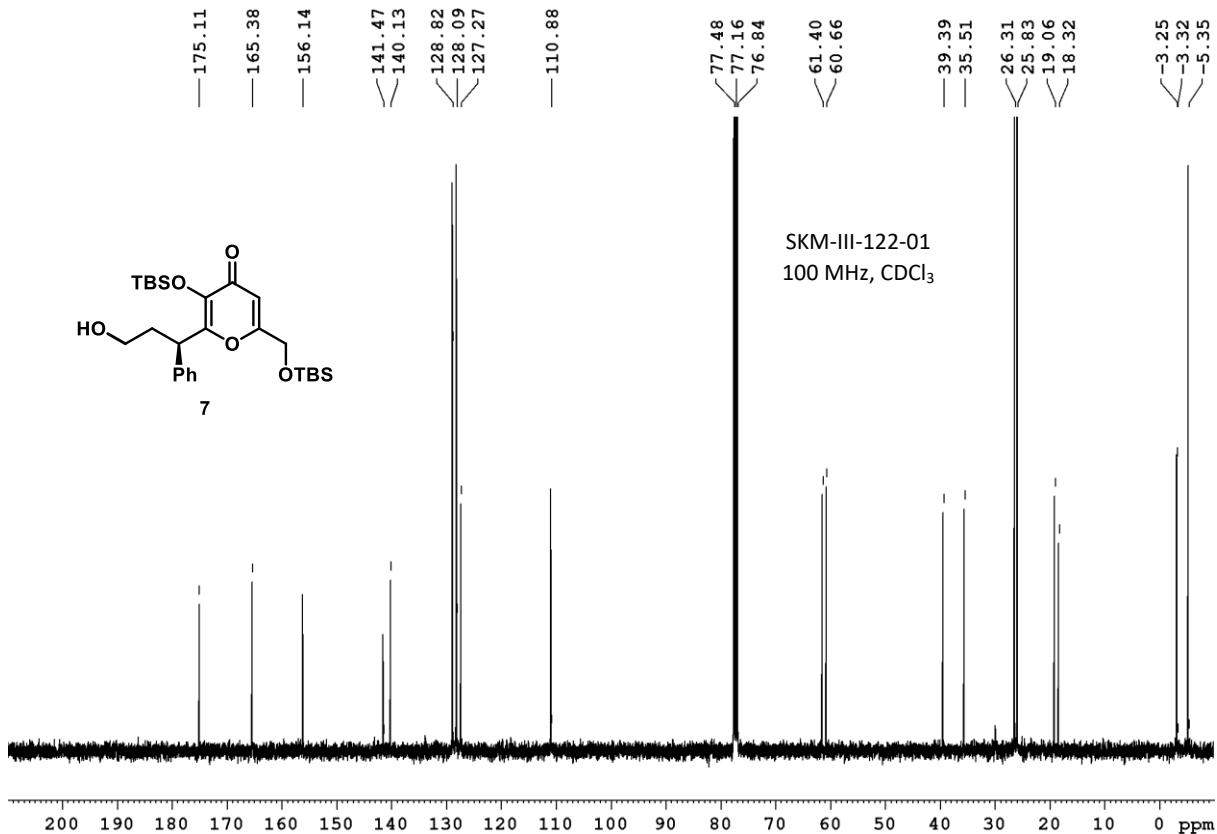

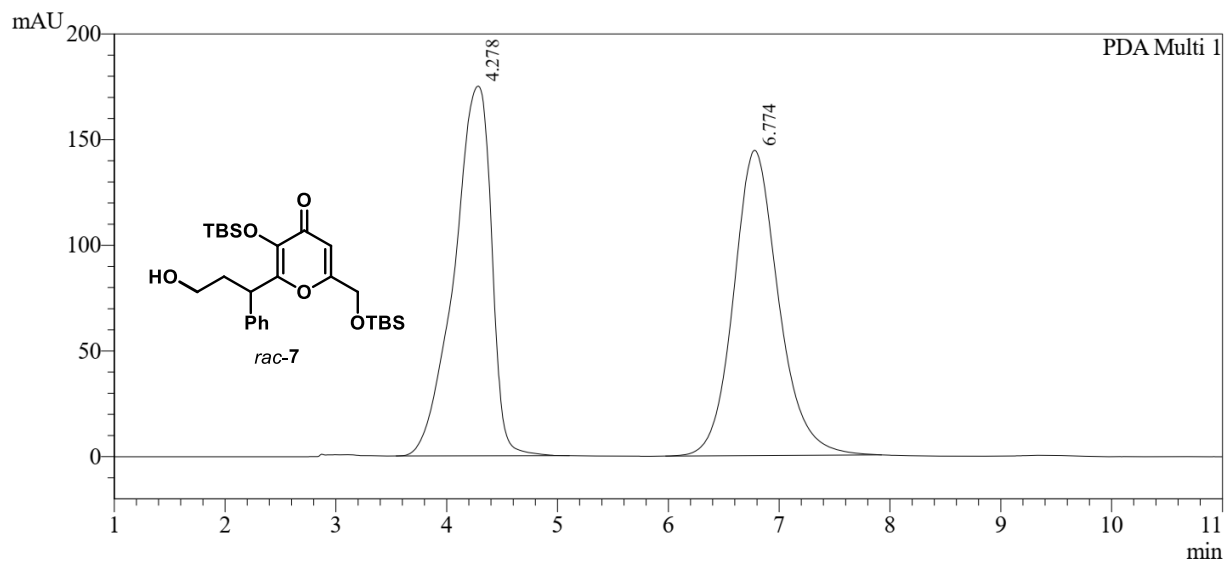

PeakTable

PDA Ch1 254nm 4nm

| Peak# | Ret. Time | Area    | Area %  |
|-------|-----------|---------|---------|
| 1     | 4.278     | 4105388 | 50.124  |
| 2     | 6.774     | 4085006 | 49.876  |
| Total |           | 8190394 | 100.000 |

Phenomenex Cellulose-2 column (90:10 *n*-Hexane/*i*-PrOH, 1.0 mL/min, 20 °C)

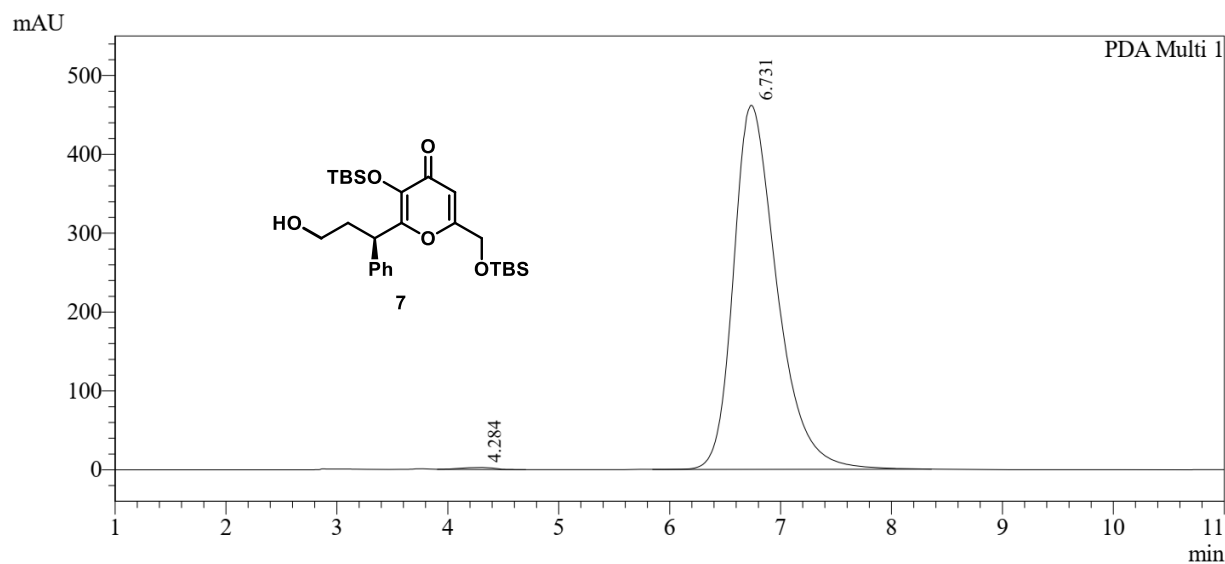

PeakTable

PDA Ch1 254nm 4nm

| Peak# | Ret. Time | Area     | Area %  |
|-------|-----------|----------|---------|
| 1     | 4.284     | 50508    | 0.399   |
| 2     | 6.731     | 12601482 | 99.601  |
| Total |           | 12651990 | 100.000 |

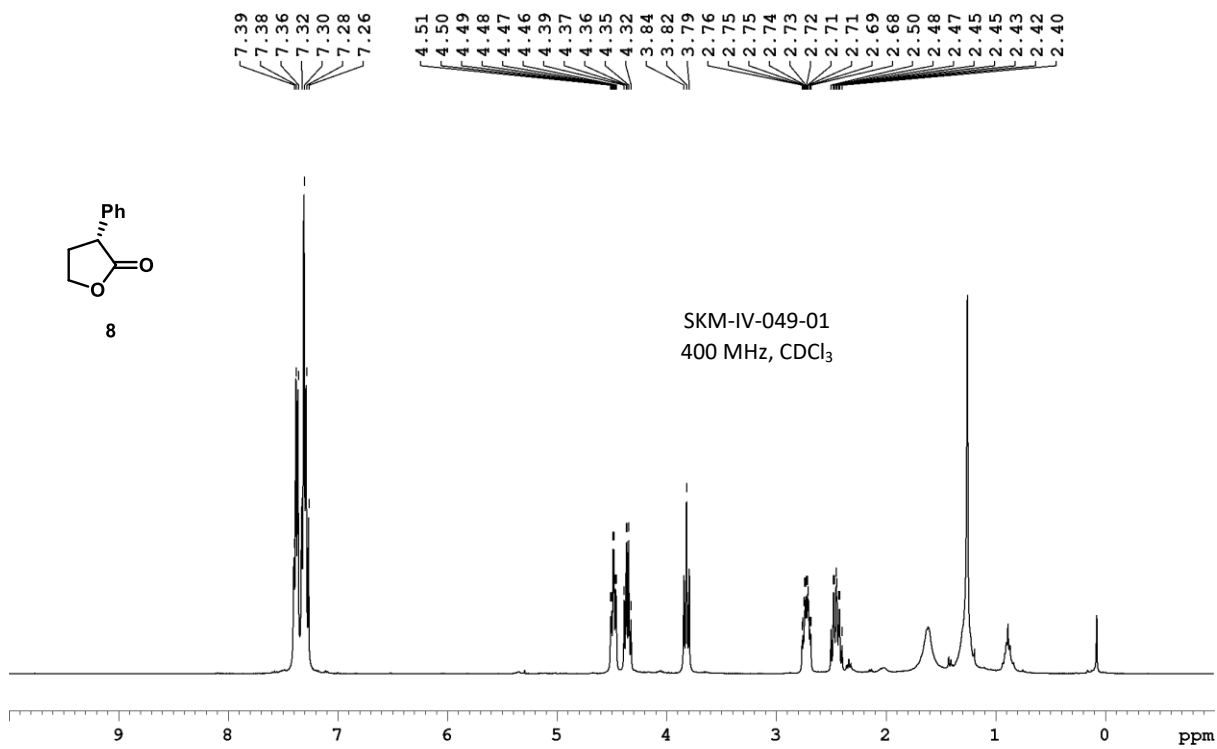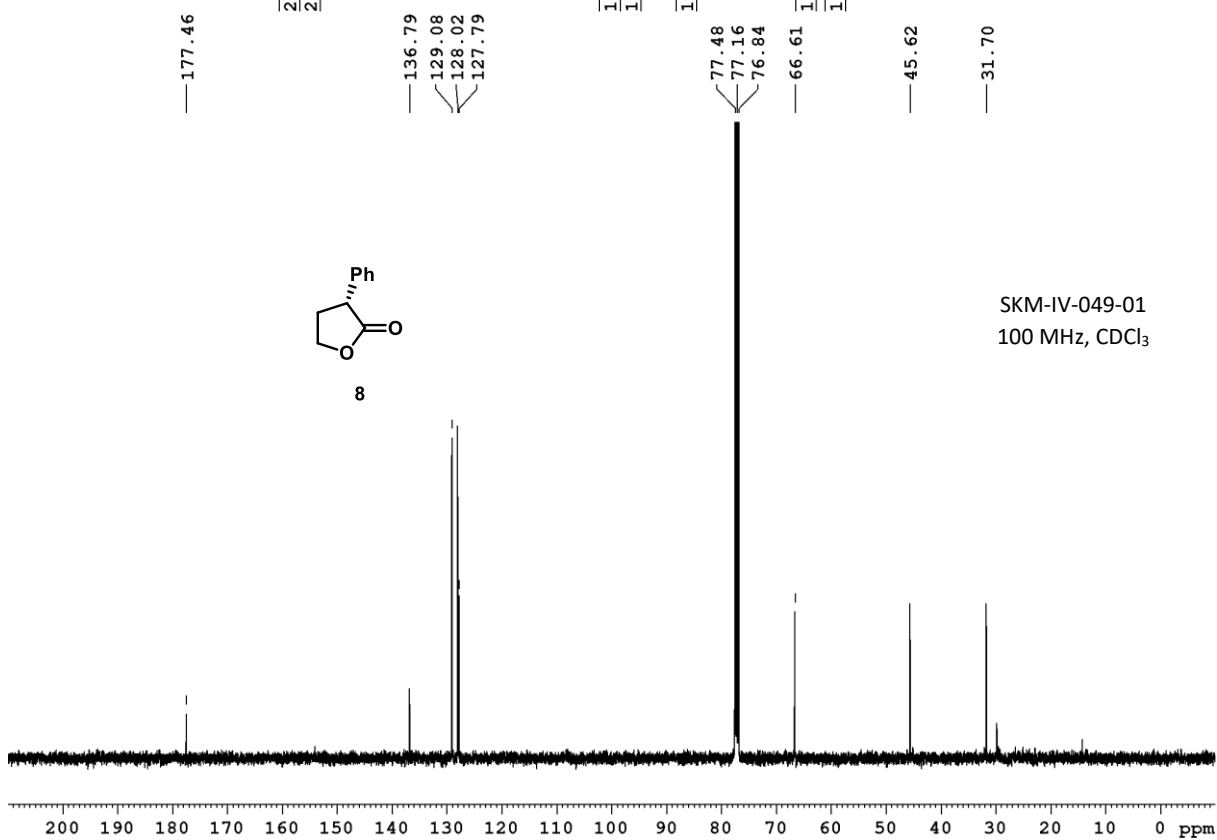

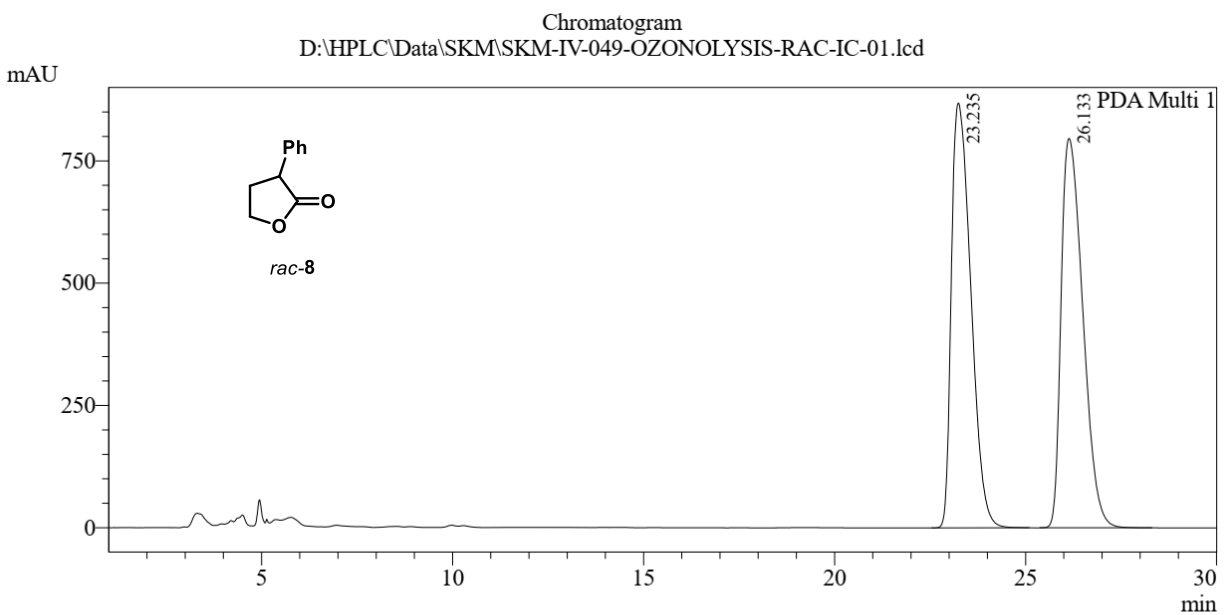

PeakTable

PDA Ch1 210nm 4nm

| Peak# | Ret. Time | Area     | Area %  |
|-------|-----------|----------|---------|
| 1     | 23.235    | 30815757 | 49.504  |
| 2     | 26.133    | 31433433 | 50.496  |
| Total |           | 62249190 | 100.000 |

Daicel Chiralpak IC column (80:20 *n*-Hexane/*i*-PrOH, 1.0 mL/min, 20 °C)

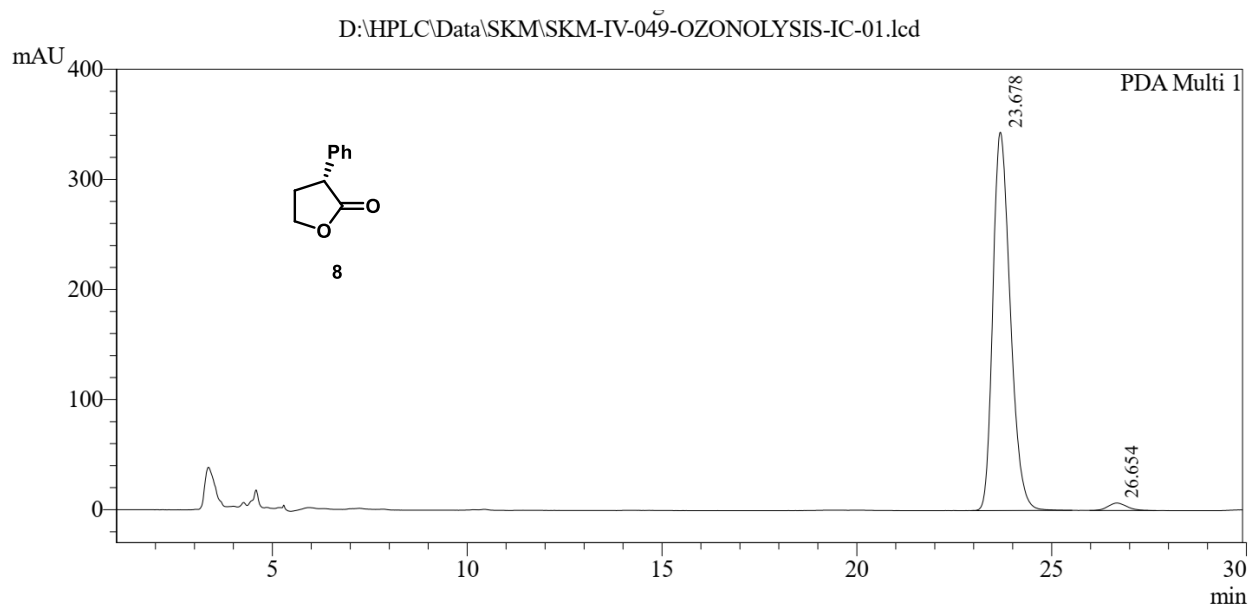

PeakTable

PDA Ch1 210nm 4nm

| Peak# | Ret. Time | Area     | Area %  |
|-------|-----------|----------|---------|
| 1     | 23.678    | 10699807 | 97.936  |
| 2     | 26.654    | 225476   | 2.064   |
| Total |           | 10925283 | 100.000 |

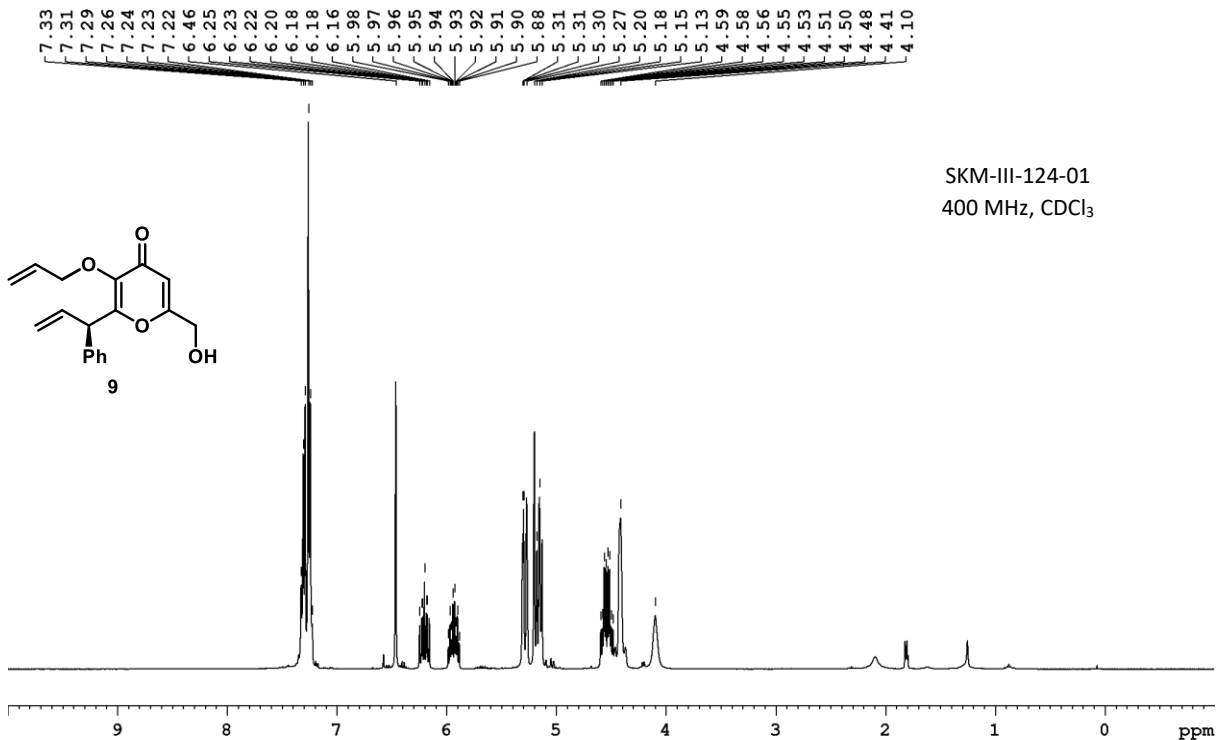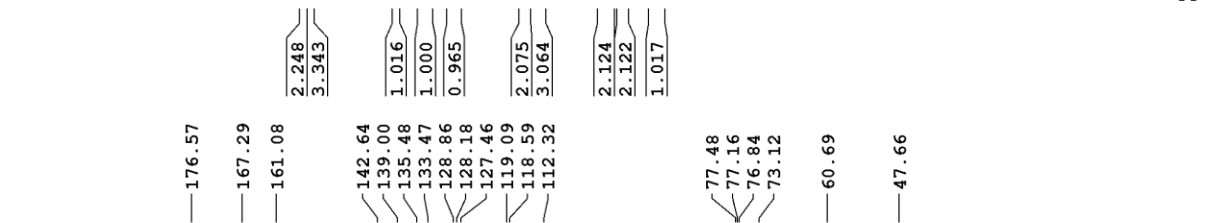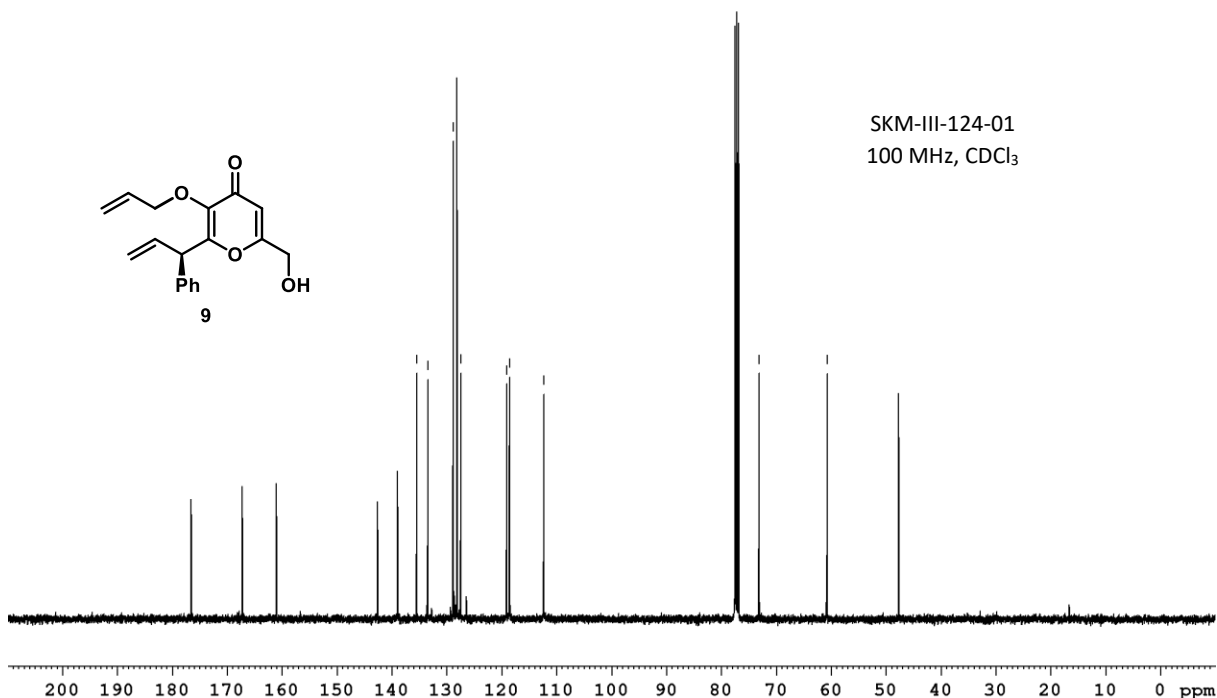

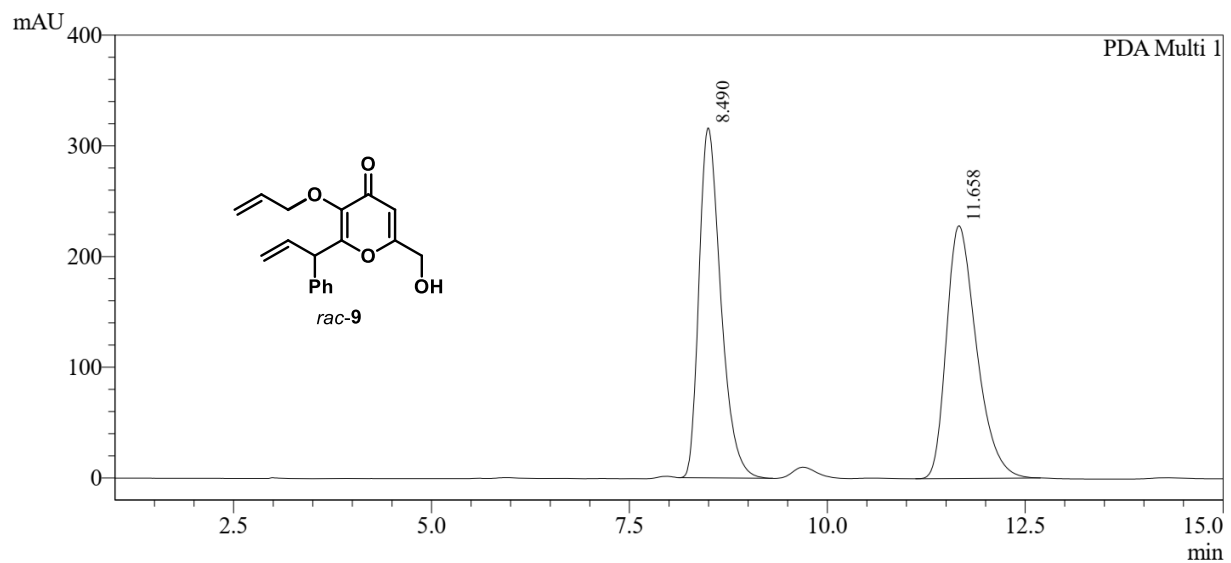

PeakTable

PDA Ch1 257nm 4nm

| Peak# | Ret. Time | Area     | Area %  |
|-------|-----------|----------|---------|
| 1     | 8.490     | 6054124  | 50.012  |
| 2     | 11.658    | 6051216  | 49.988  |
| Total |           | 12105340 | 100.000 |

Daicel Chiralpak AD-H column (90:10 *n*-Hexane/*i*-PrOH, 1.0 mL/min, 20 °C)

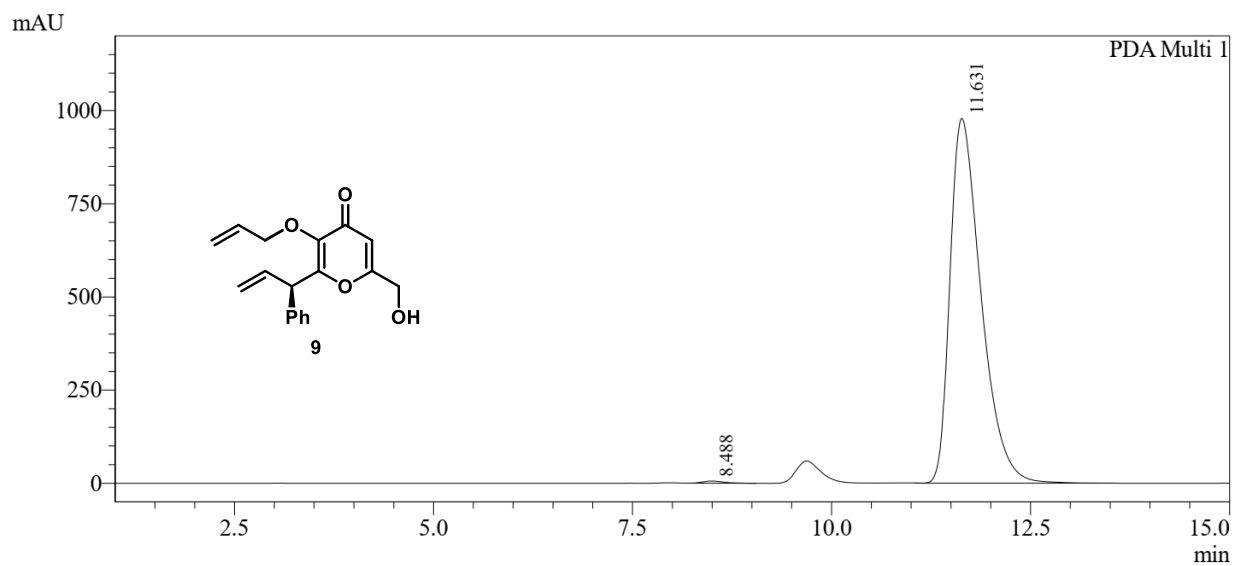

PeakTable

PDA Ch1 257nm 4nm

| Peak# | Ret. Time | Area     | Area %  |
|-------|-----------|----------|---------|
| 1     | 8.488     | 105566   | 0.396   |
| 2     | 11.631    | 26577259 | 99.604  |
| Total |           | 26682824 | 100.000 |

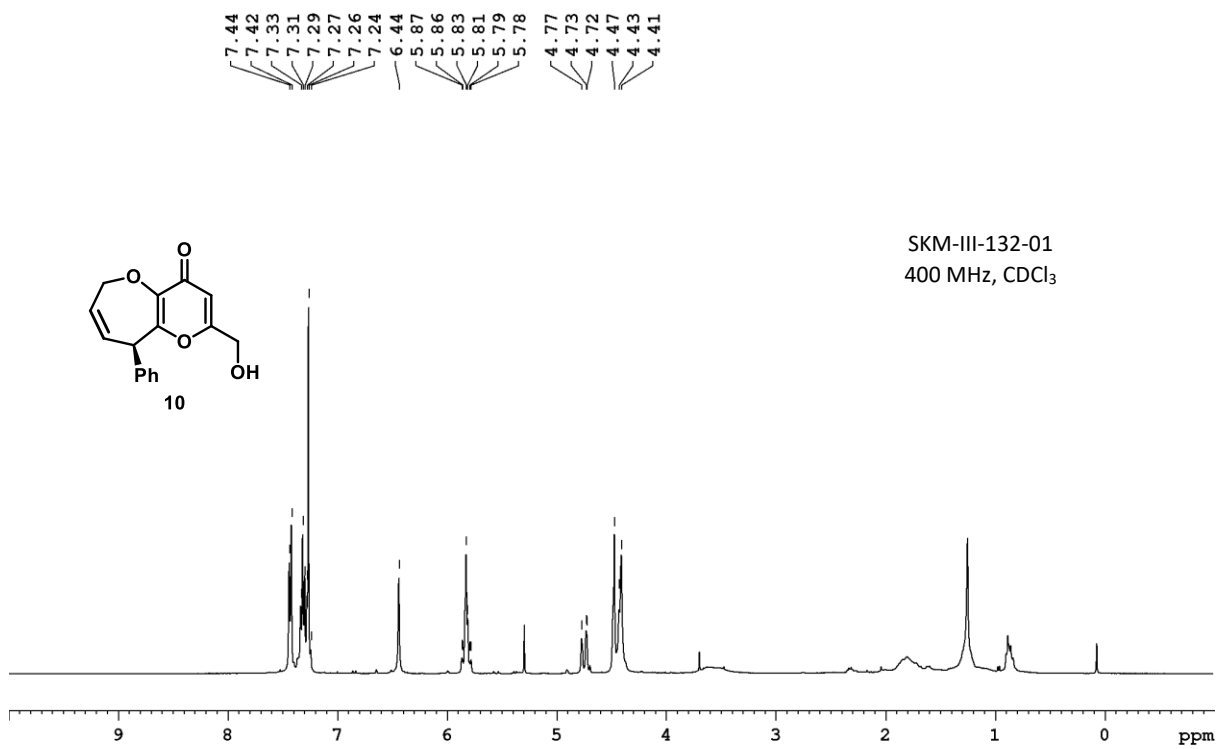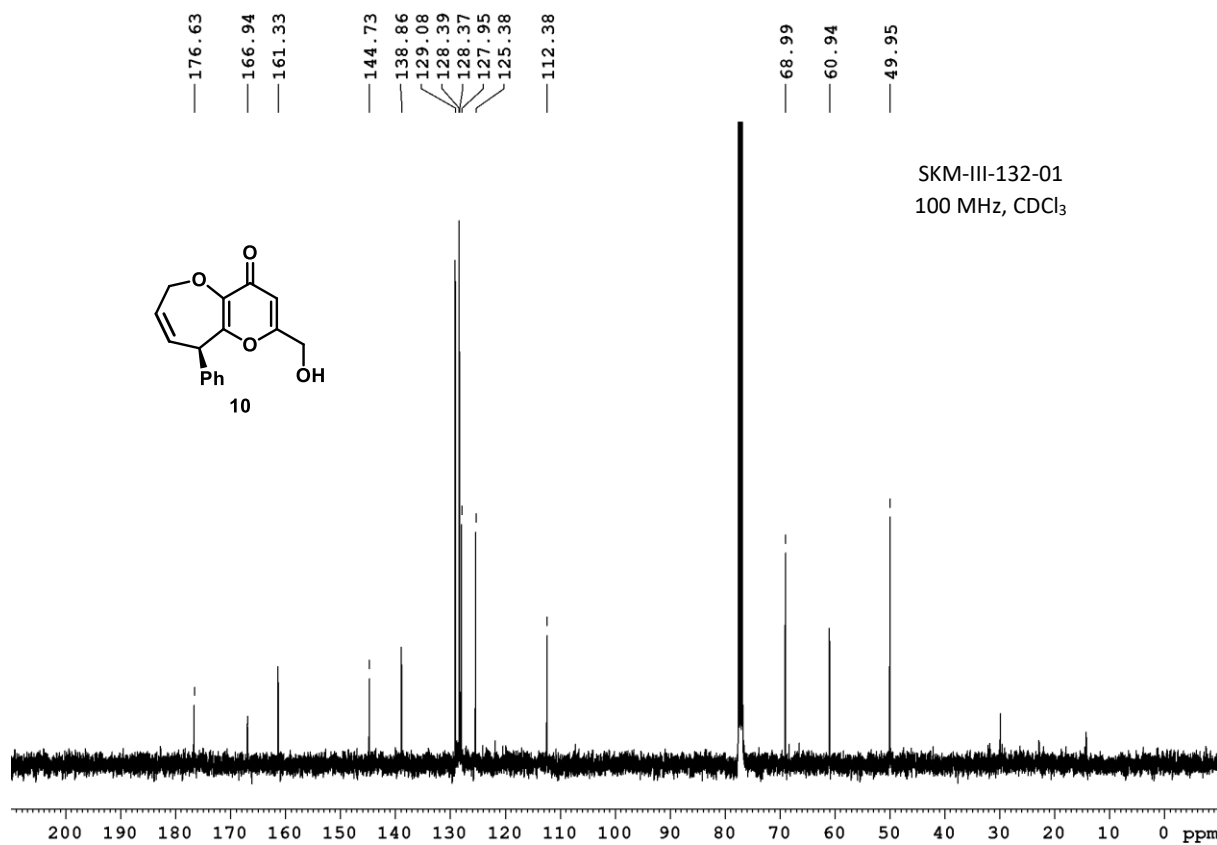



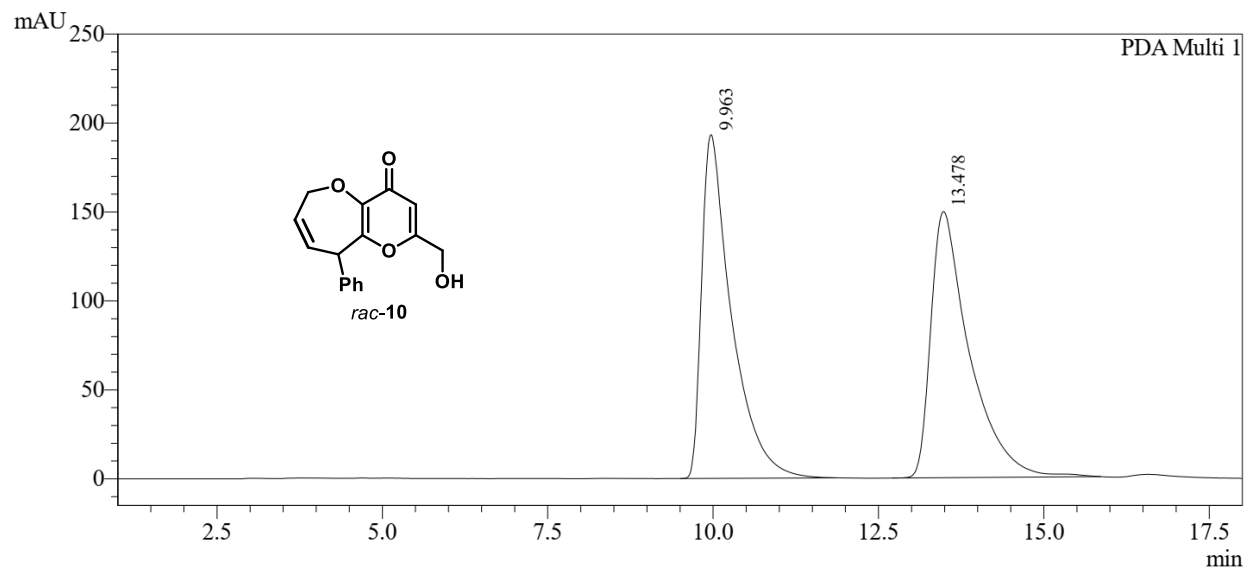

PeakTable

PDA Ch1 259nm 4nm

| Peak# | Ret. Time | Area     | Area %  |
|-------|-----------|----------|---------|
| 1     | 9.963     | 6078716  | 50.015  |
| 2     | 13.478    | 6074964  | 49.985  |
| Total |           | 12153680 | 100.000 |

Daicel Chiralpak AD-H column (85:15 *n*-Hexane/*i*-PrOH, 1.0 mL/min, 20 °C)

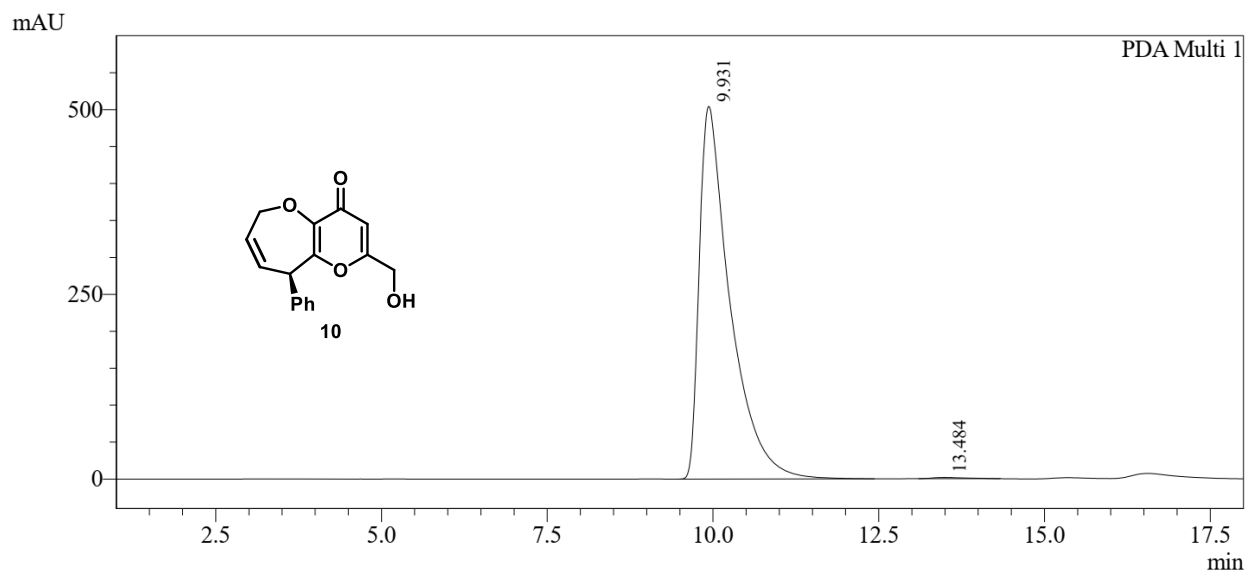

PeakTable

PDA Ch1 259nm 4nm

| Peak# | Ret. Time | Area     | Area %  |
|-------|-----------|----------|---------|
| 1     | 9.931     | 16347226 | 99.635  |
| 2     | 13.484    | 59866    | 0.365   |
| Total |           | 16407092 | 100.000 |

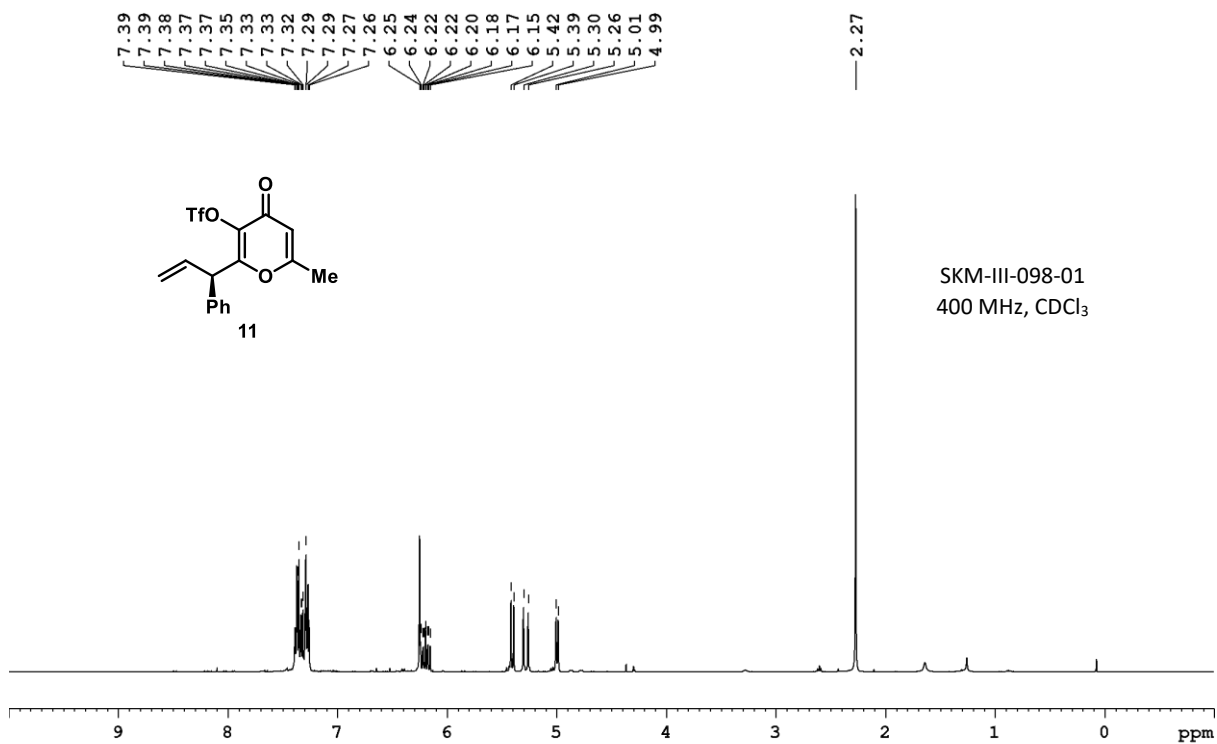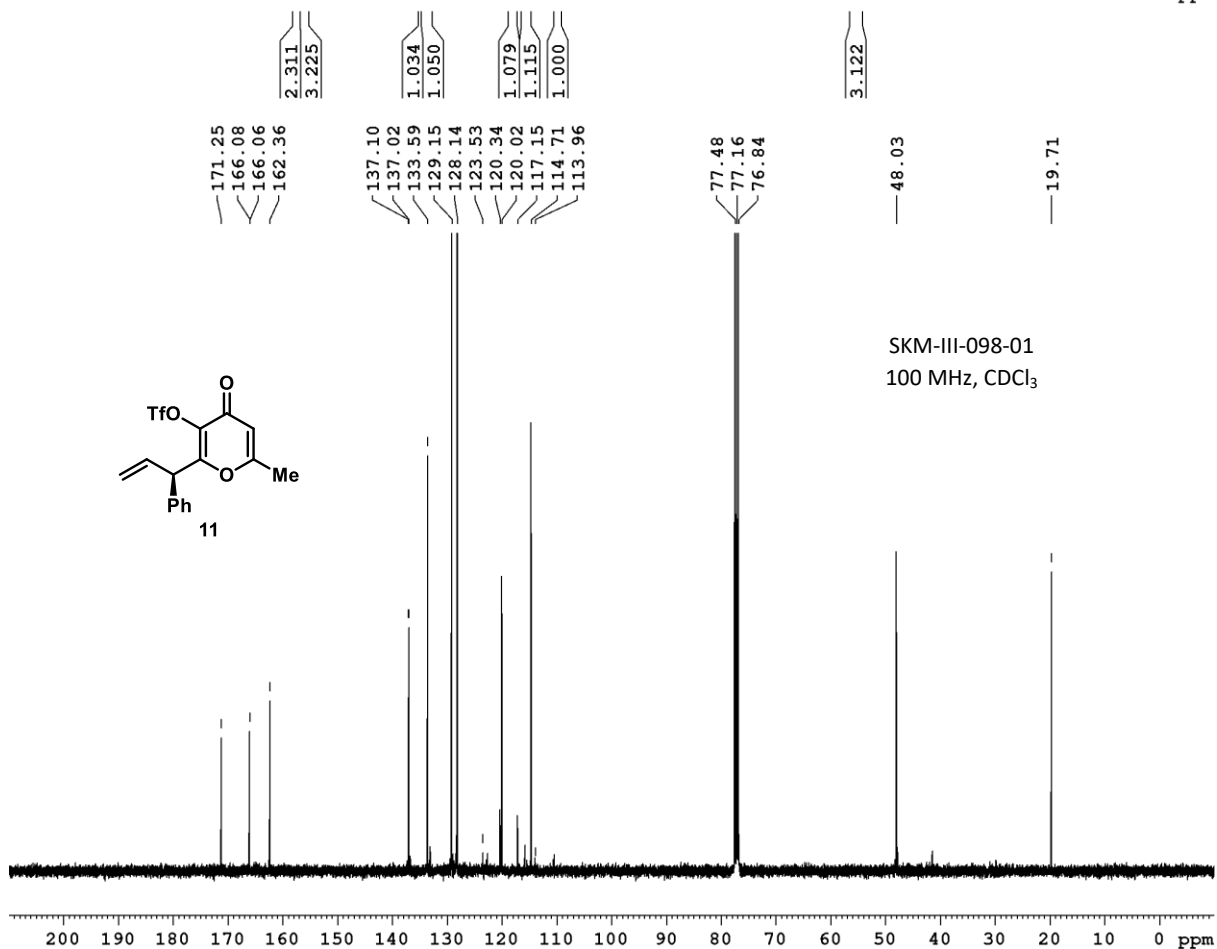

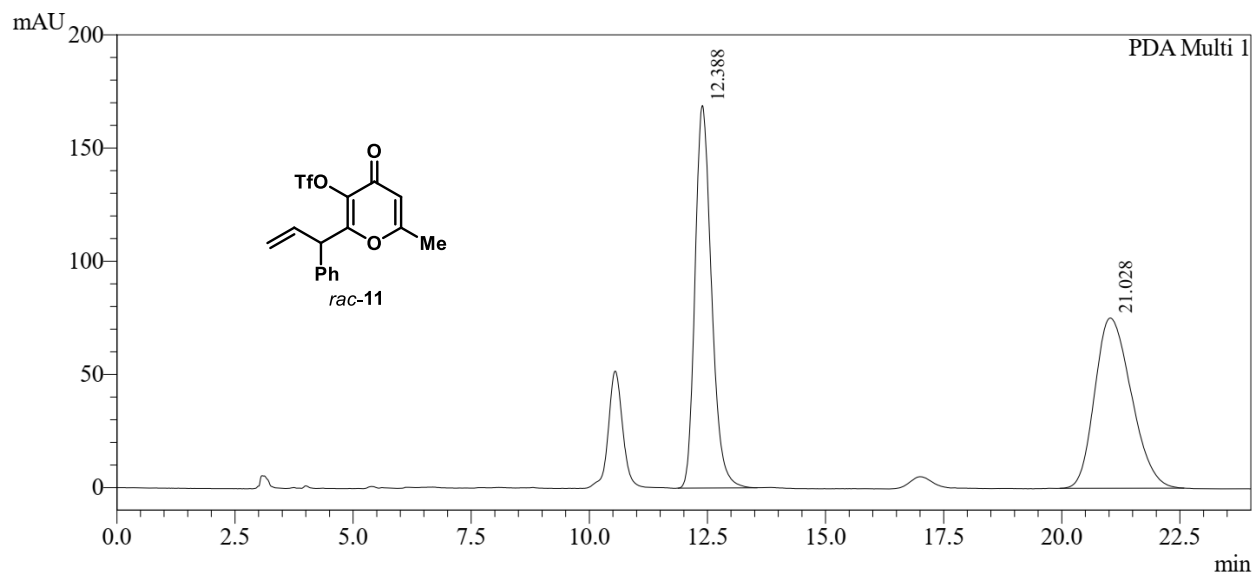

PeakTable

PDA Ch1 221nm 4nm

| Peak# | Ret. Time | Area    | Area %  |
|-------|-----------|---------|---------|
| 1     | 12.388    | 4101190 | 50.301  |
| 2     | 21.028    | 4052139 | 49.699  |
| Total |           | 8153329 | 100.000 |

Daicel Chiralpak IH column (90:10 *n*-Hexane/*i*-PrOH, 1.0 mL/min, 20 °C)

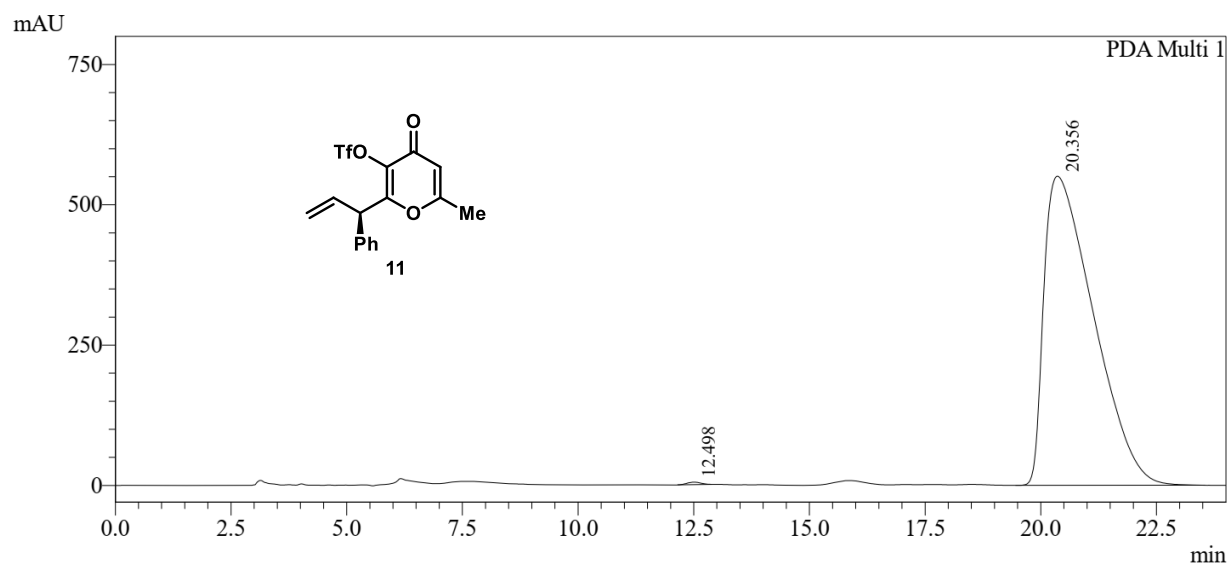

PeakTable

PDA Ch1 221nm 4nm

| Peak# | Ret. Time | Area     | Area %  |
|-------|-----------|----------|---------|
| 1     | 12.498    | 93484    | 0.227   |
| 2     | 20.356    | 41076107 | 99.773  |
| Total |           | 41169591 | 100.000 |

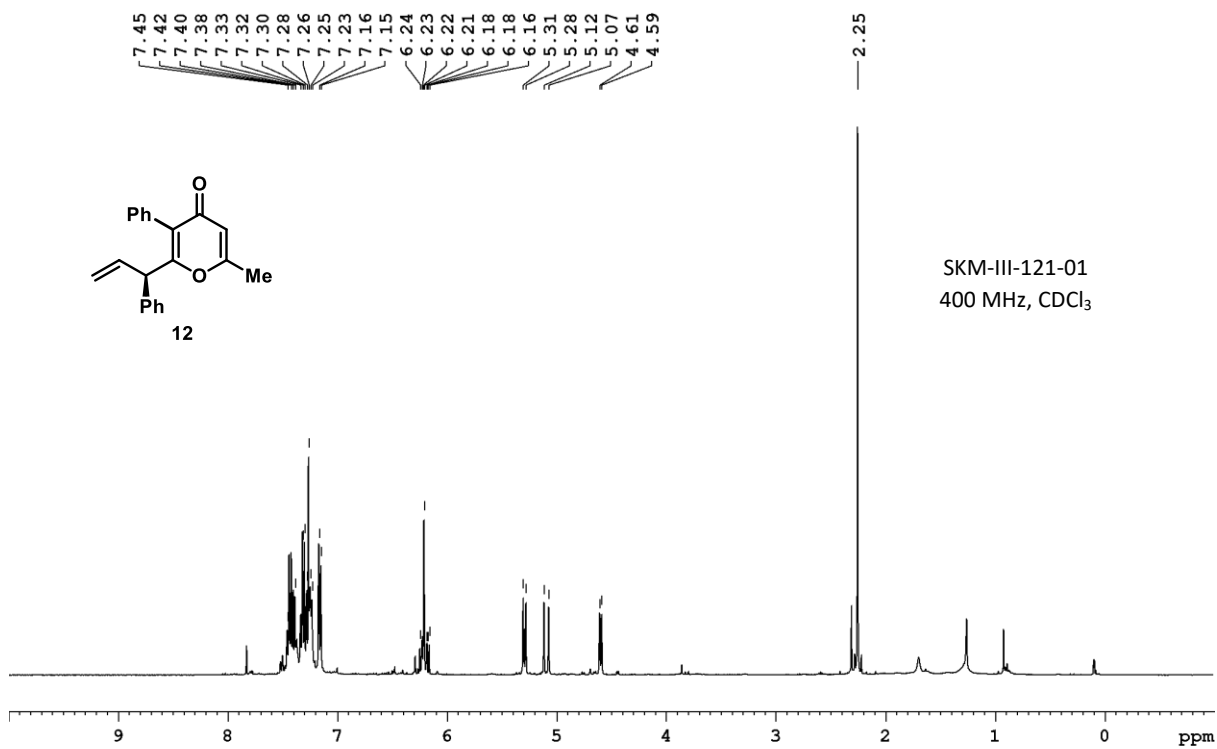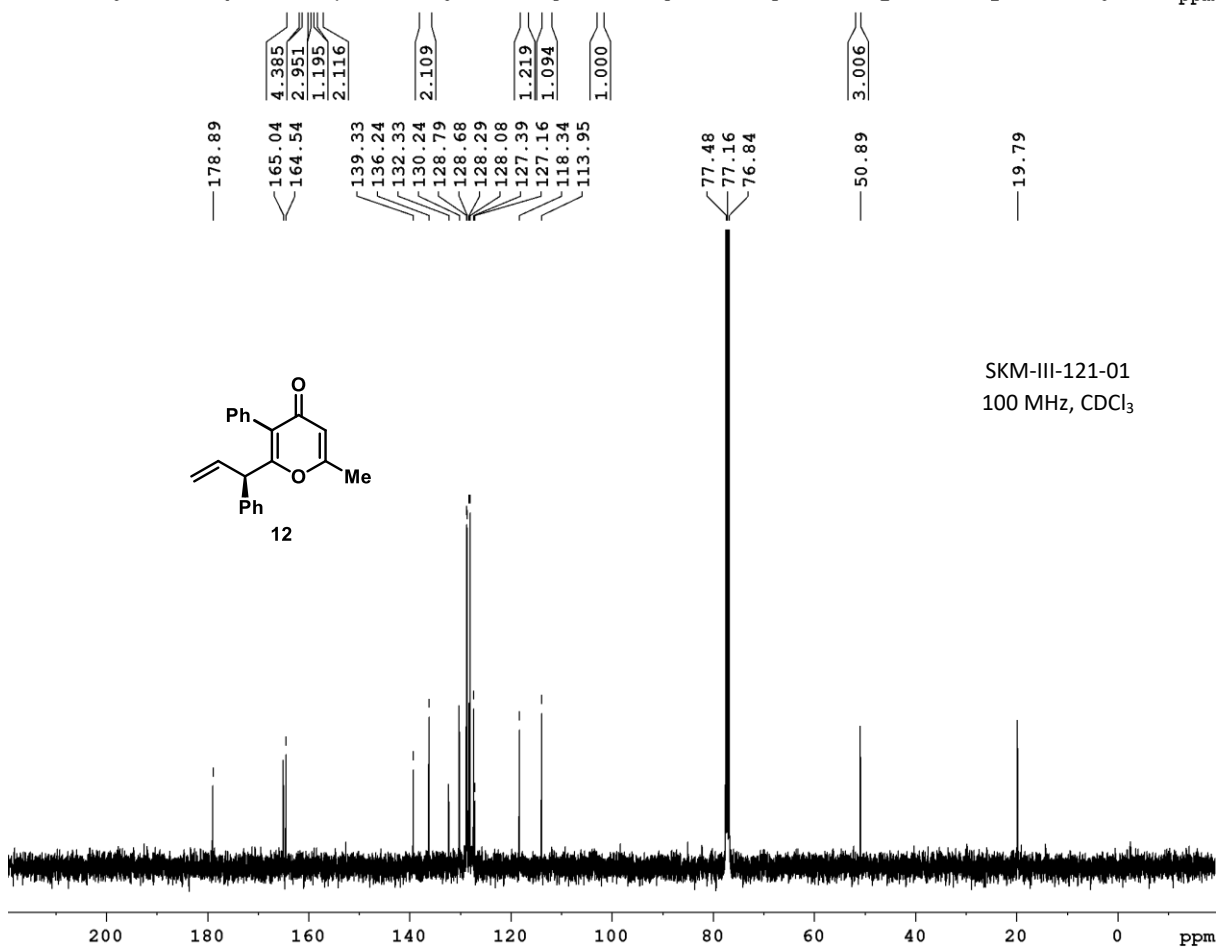

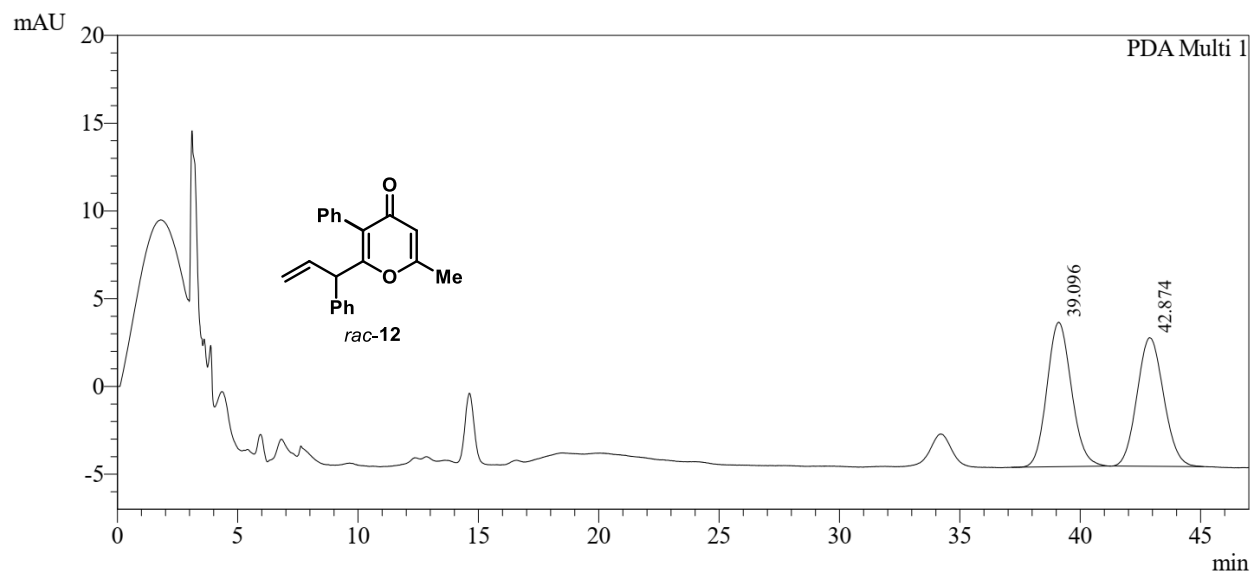

PeakTable

PDA Ch1 224nm 4nm

| Peak# | Ret. Time | Area    | Area %  |
|-------|-----------|---------|---------|
| 1     | 39.096    | 582139  | 50.828  |
| 2     | 42.874    | 563179  | 49.172  |
| Total |           | 1145317 | 100.000 |

Daicel Chiralpak IH column (90:10 *n*-Hexane/*i*-PrOH, 1 mL/min, 20 °C)

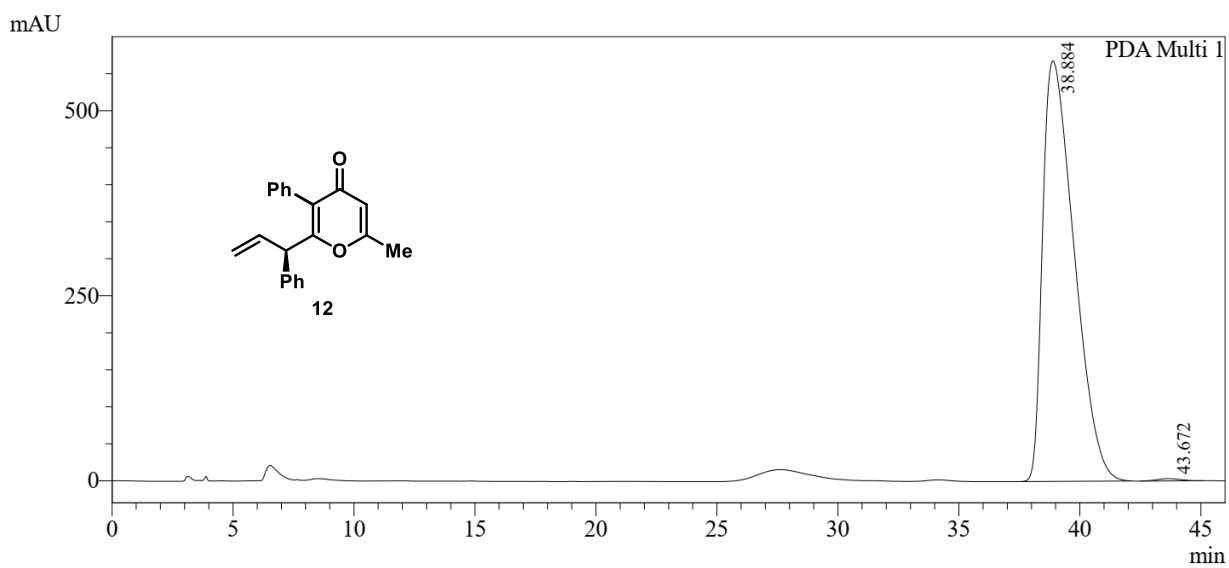

PeakTable

PDA Ch1 224nm 4nm

| Peak# | Ret. Time | Area     | Area %  |
|-------|-----------|----------|---------|
| 1     | 38.884    | 51435075 | 99.604  |
| 2     | 43.672    | 204439   | 0.396   |
| Total |           | 51639513 | 100.000 |

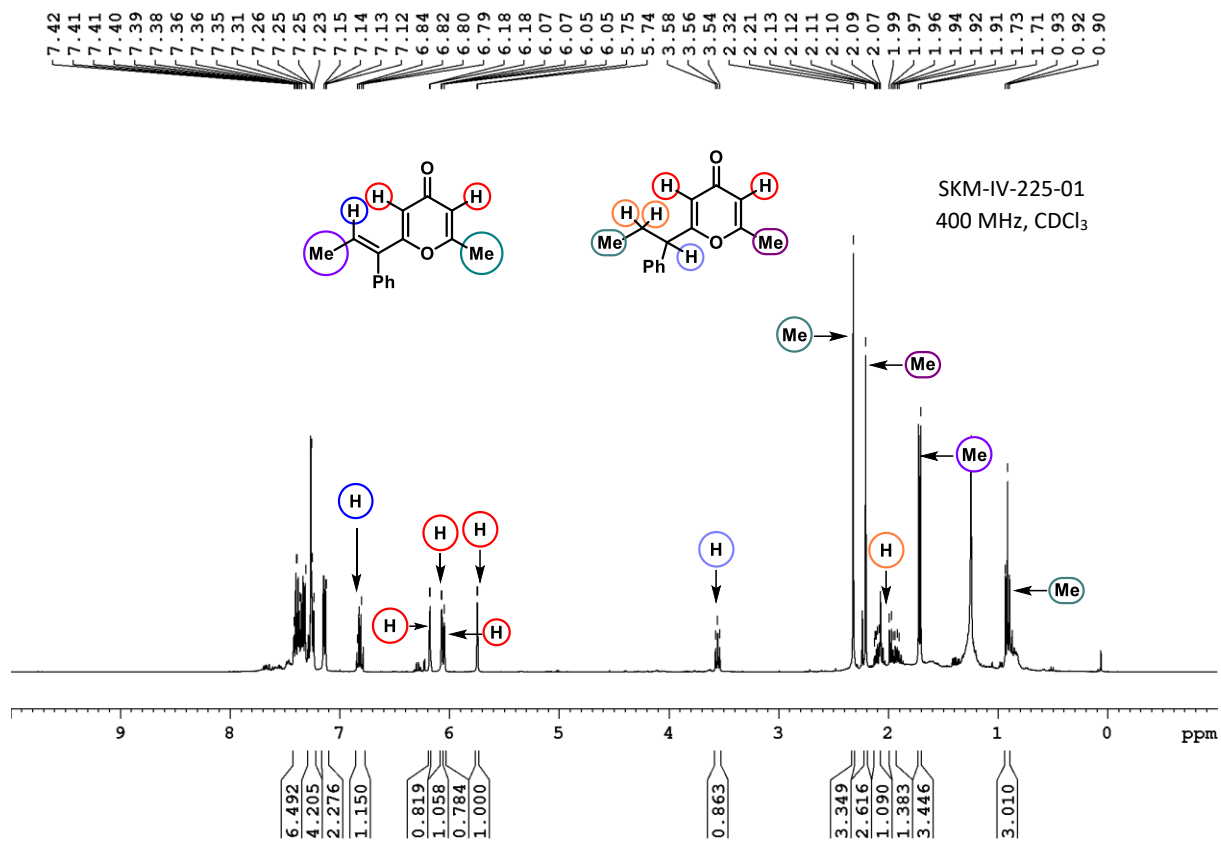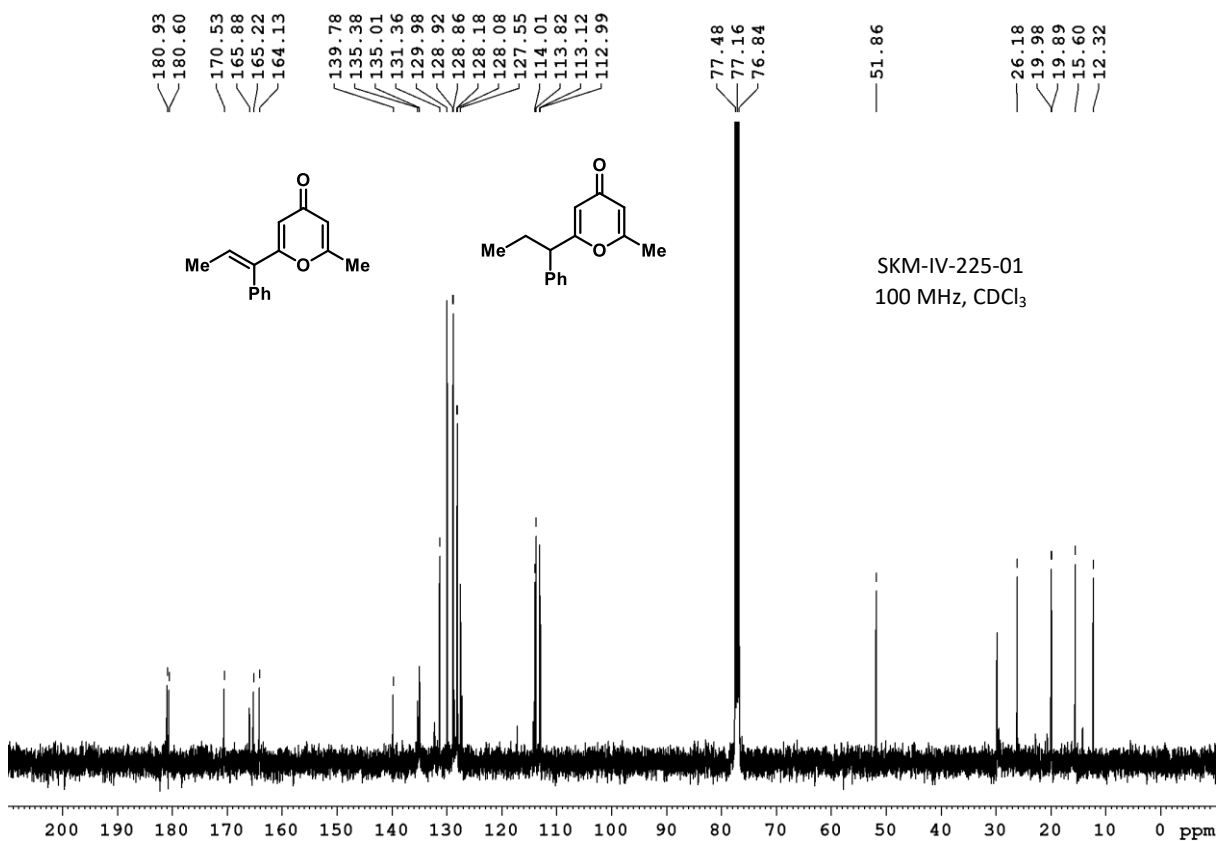

Supplement: d2sc03966d1.pdf [file d2sc03966d1.pdf]
